# Supplementary material for: Comparative oxidative ability of mononuclear and dinuclear high-valent iron–oxo species towards the activation of methane: does the axial/bridge atom modulate the reactivity?
Source: Royal Society of Chemistry journal article supplement (doi:10.1039/d2dt02559k), 2022-11-15
Supplement: d2dt02559k1.pdf [file d2dt02559k1.pdf]

## **Comparative oxidative ability of mononuclear and dinuclear high-valent iron-oxo species towards activation of methane: does the axial/bridge atom modulate the reactivity?**

Mursaleem Ansari\*, and Gopalan Rajaraman\*

*Department of Chemistry, Indian Institute of Technology Bombay, Mumbai 400076, India.*  
*Email: [rajaraman@chem.iitb.ac.in](mailto:rajaraman@chem.iitb.ac.in); [mansaribhu@gmail.com](mailto:mansaribhu@gmail.com)*

**Table S1.** B3LYP-D3 computed optimized energy of possible spin states of species **1**, **2**, **3**, **4**, **4a**, **4b**, and **4c**.

| Spin states                                | Energy(kJ/mol) |
|--------------------------------------------|----------------|
| <b>1</b>                                   |                |
| <sup>5</sup> <b>1</b> <sub>(hs)</sub>      | 43.9           |
| <sup>3</sup> <b>1</b> <sub>(is)</sub>      | 0.0            |
| <sup>1</sup> <b>1</b> <sub>(ls)</sub>      | 114.9          |
| <b>2</b>                                   |                |
| <sup>6</sup> <b>2</b> <sub>(hs)</sub>      | 26.5           |
| <sup>4</sup> <b>2</b> <sub>(hs)</sub>      | 27.9           |
| <sup>4</sup> <b>2</b> <sub>(is)</sub>      | 0.0            |
| <sup>2</sup> <b>2</b> <sub>(is)</sub>      | 6.9            |
| <sup>2</sup> <b>2</b> <sub>(ls)</sub>      | 7.1            |
| <b>3</b>                                   |                |
| <sup>10</sup> <b>3</b> <sub>(hs, hs)</sub> | 101.1          |
| <sup>8</sup> <b>3</b> <sub>(hs, hs)</sub>  | 105.3          |
| <sup>2</sup> <b>3</b> <sub>(hs, hs)</sub>  | 107.8          |
| <sup>6</sup> <b>3</b> <sub>(is, is)</sub>  | 2.9            |
| <sup>4</sup> <b>3</b> <sub>(is, is)</sub>  | 3.3            |
| <sup>2</sup> <b>3</b> <sub>(is, is)</sub>  | 0.0            |
| <b>4</b>                                   |                |
| <sup>10</sup> <b>4</b> <sub>(hs, hs)</sub> | 433.2          |
| <sup>8</sup> <b>4</b> <sub>(hs, hs)</sub>  | 296.7          |
| <sup>2</sup> <b>4</b> <sub>(hs, hs)</sub>  | 0.0            |
| <sup>6</sup> <b>4</b> <sub>(is, is)</sub>  | 88.2           |
| <sup>2</sup> <b>4</b> <sub>(is, is)</sub>  | 55.9           |
| <b>4a</b>                                  |                |
| <sup>6</sup> <b>4a</b> <sub>(hs)</sub>     | 0.0            |
| <sup>4</sup> <b>4a</b> <sub>(hs)</sub>     | 27.5           |
| <sup>4</sup> <b>4a</b> <sub>(is)</sub>     | 9.7            |
| <sup>2</sup> <b>4a</b> <sub>(is)</sub>     | 5.6            |
| <sup>2</sup> <b>4a</b> <sub>(ls)</sub>     | 46.1           |
| <b>4b</b>                                  |                |
| <sup>6</sup> <b>4b</b> <sub>(hs)</sub>     | 130.9          |
| <sup>4</sup> <b>4b</b> <sub>(hs)</sub>     | 47.5           |
| <sup>4</sup> <b>4b</b> <sub>(is)</sub>     | 0.0            |
| <sup>2</sup> <b>4b</b> <sub>(is)</sub>     | 96.1           |
| <sup>2</sup> <b>4b</b> <sub>(ls)</sub>     | 44.3           |
| <b>4c</b>                                  |                |
| <sup>6</sup> <b>4c</b> <sub>(hs)</sub>     | 58.3           |
| <sup>4</sup> <b>4c</b> <sub>(hs)</sub>     | 55.6           |
| <sup>4</sup> <b>4c</b> <sub>(is)</sub>     | 4.0            |
| <sup>2</sup> <b>4c</b> <sub>(is)</sub>     | 0.0            |
| <sup>2</sup> <b>4c</b> <sub>(ls)</sub>     | 36.4           |

**Table S2.** Energy computed using DLPNO-CCSD(T) method for species **1**, **2**, **4a**, **4b**, and **4c**.

| Spin states                            | Energy(kJ/mol) |
|----------------------------------------|----------------|
| <b>1</b>                               |                |
| <sup>5</sup> <b>1</b> <sub>(hs)</sub>  | 6.9            |
| <sup>3</sup> <b>1</b> <sub>(is)</sub>  | 0.0            |
| <sup>1</sup> <b>1</b> <sub>(ls)</sub>  | 99.5           |
| <b>2</b>                               |                |
| <sup>6</sup> <b>2</b> <sub>(hs)</sub>  | 120.6          |
| <sup>4</sup> <b>2</b> <sub>(hs)</sub>  | 37.9           |
| <sup>4</sup> <b>2</b> <sub>(is)</sub>  | 0.0            |
| <sup>2</sup> <b>2</b> <sub>(is)</sub>  | 194.2          |
| <sup>2</sup> <b>2</b> <sub>(ls)</sub>  | 193.5          |
| <b>4a</b>                              |                |
| <sup>6</sup> <b>4a</b> <sub>(hs)</sub> | 0.0            |
| <sup>4</sup> <b>4a</b> <sub>(hs)</sub> | 197.0          |
| <sup>4</sup> <b>4a</b> <sub>(is)</sub> | 112.0          |
| <sup>2</sup> <b>4a</b> <sub>(is)</sub> | 120.9          |
| <sup>2</sup> <b>4a</b> <sub>(ls)</sub> | 104.4          |
| <b>4b</b>                              |                |
| <sup>6</sup> <b>4b</b> <sub>(hs)</sub> | 283.7          |
| <sup>4</sup> <b>4b</b> <sub>(hs)</sub> | 61.7           |
| <sup>4</sup> <b>4b</b> <sub>(is)</sub> | 0.0            |
| <sup>2</sup> <b>4b</b> <sub>(is)</sub> | 9.2            |
| <sup>2</sup> <b>4b</b> <sub>(ls)</sub> | 0.9            |
| <b>4c</b>                              |                |
| <sup>6</sup> <b>4c</b> <sub>(hs)</sub> | 121.0          |
| <sup>4</sup> <b>4c</b> <sub>(hs)</sub> | 5.8            |
| <sup>4</sup> <b>4c</b> <sub>(is)</sub> | 65.4           |
| <sup>2</sup> <b>4c</b> <sub>(is)</sub> | 0.0            |
| <sup>2</sup> <b>4c</b> <sub>(ls)</sub> | 6.9            |

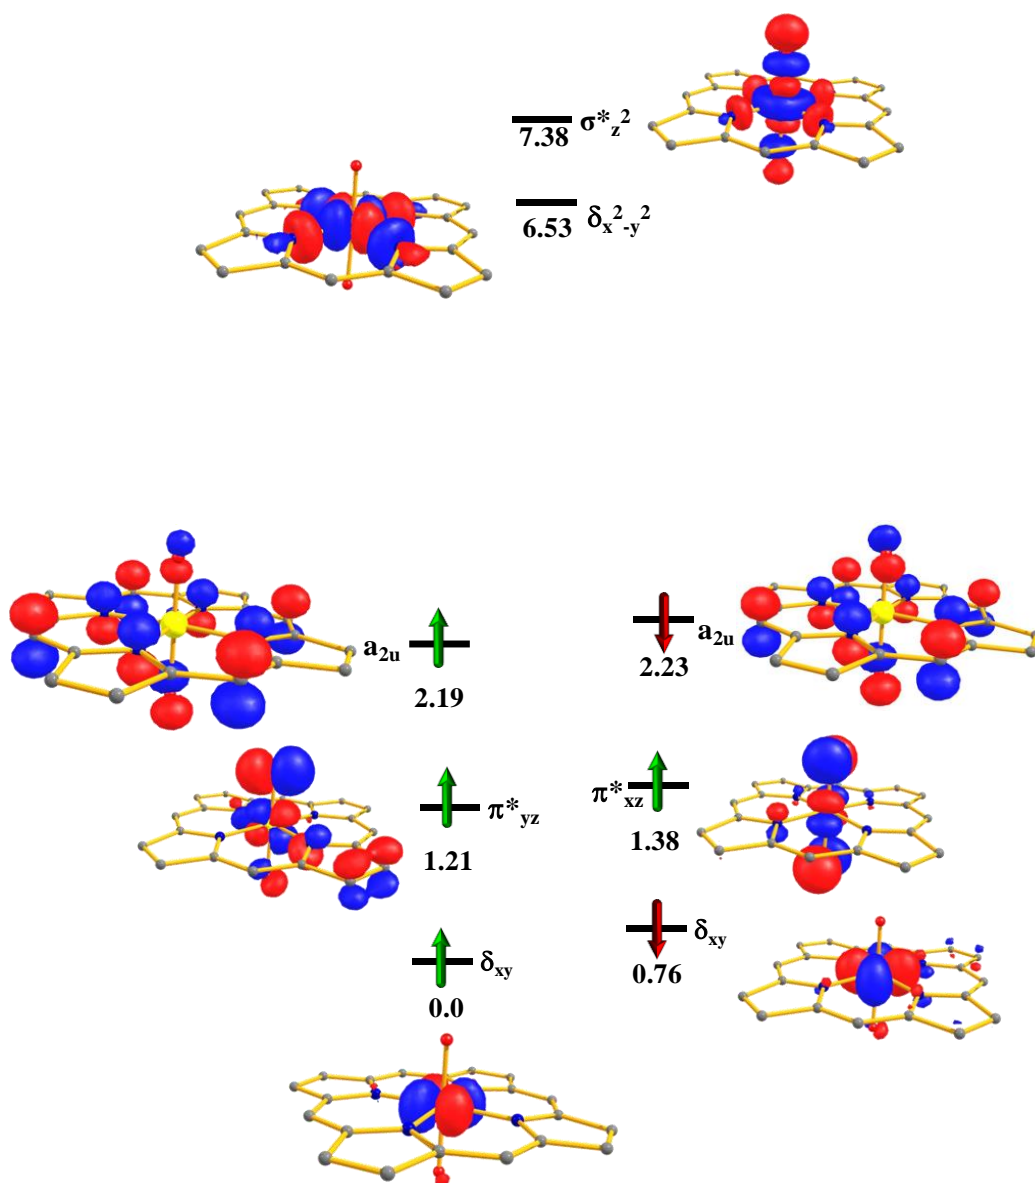

**Figure S1.** Computed Eigen-value plot incorporating energies computed for d-based orbitals for alpha and beta spin of  $^3\mathbf{1}_{(is)}$  species (energies are given in eV).

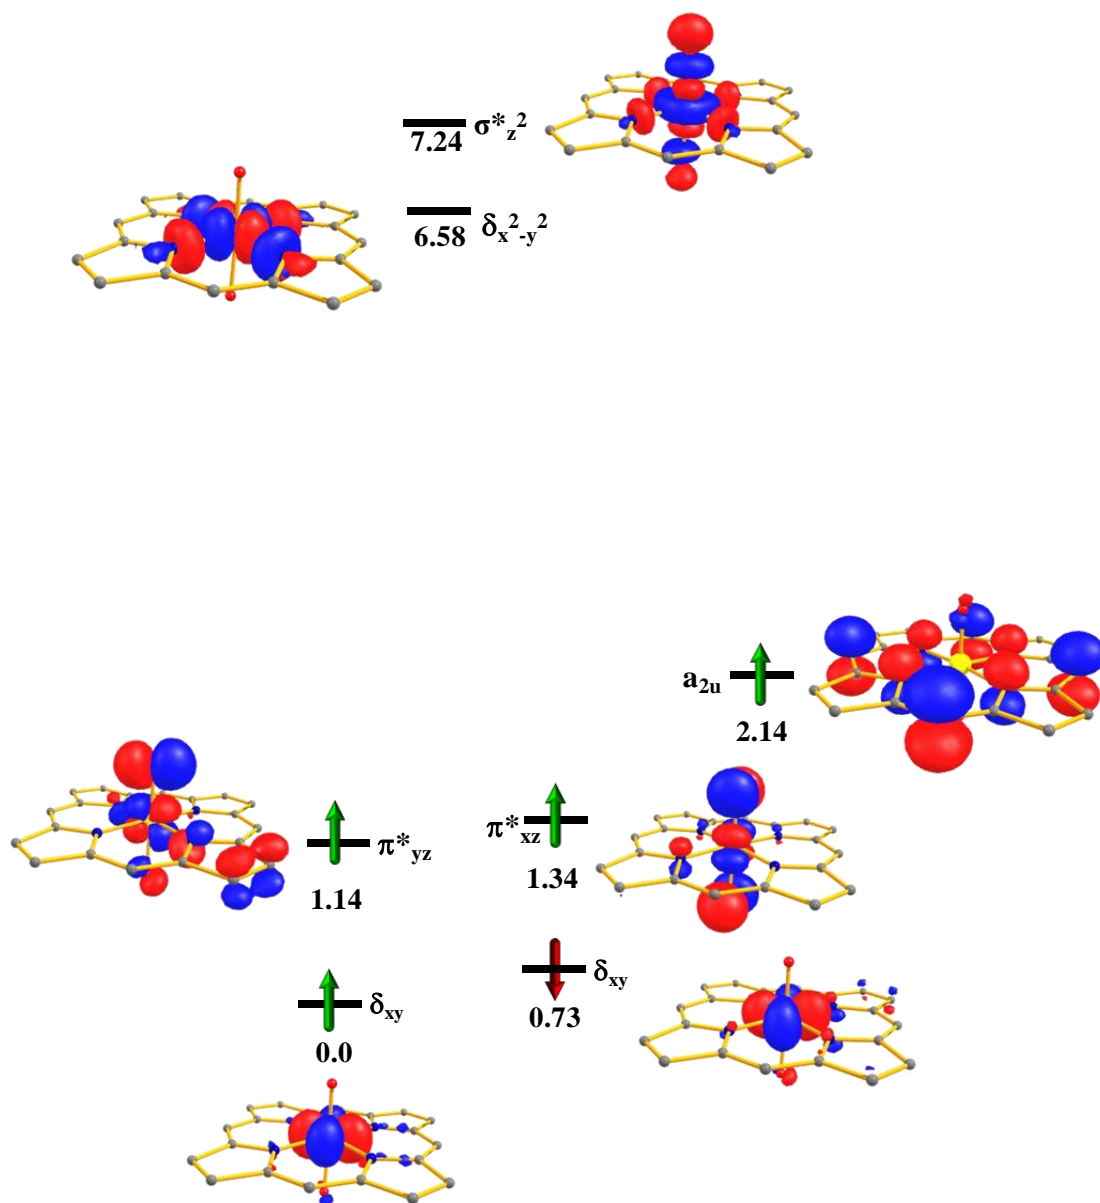

**Figure S2.** Computed Eigen-value plot incorporating energies computed for d-based orbitals for alpha and beta spin of  ${}^42_{(is)}$  species (energies are given in eV).

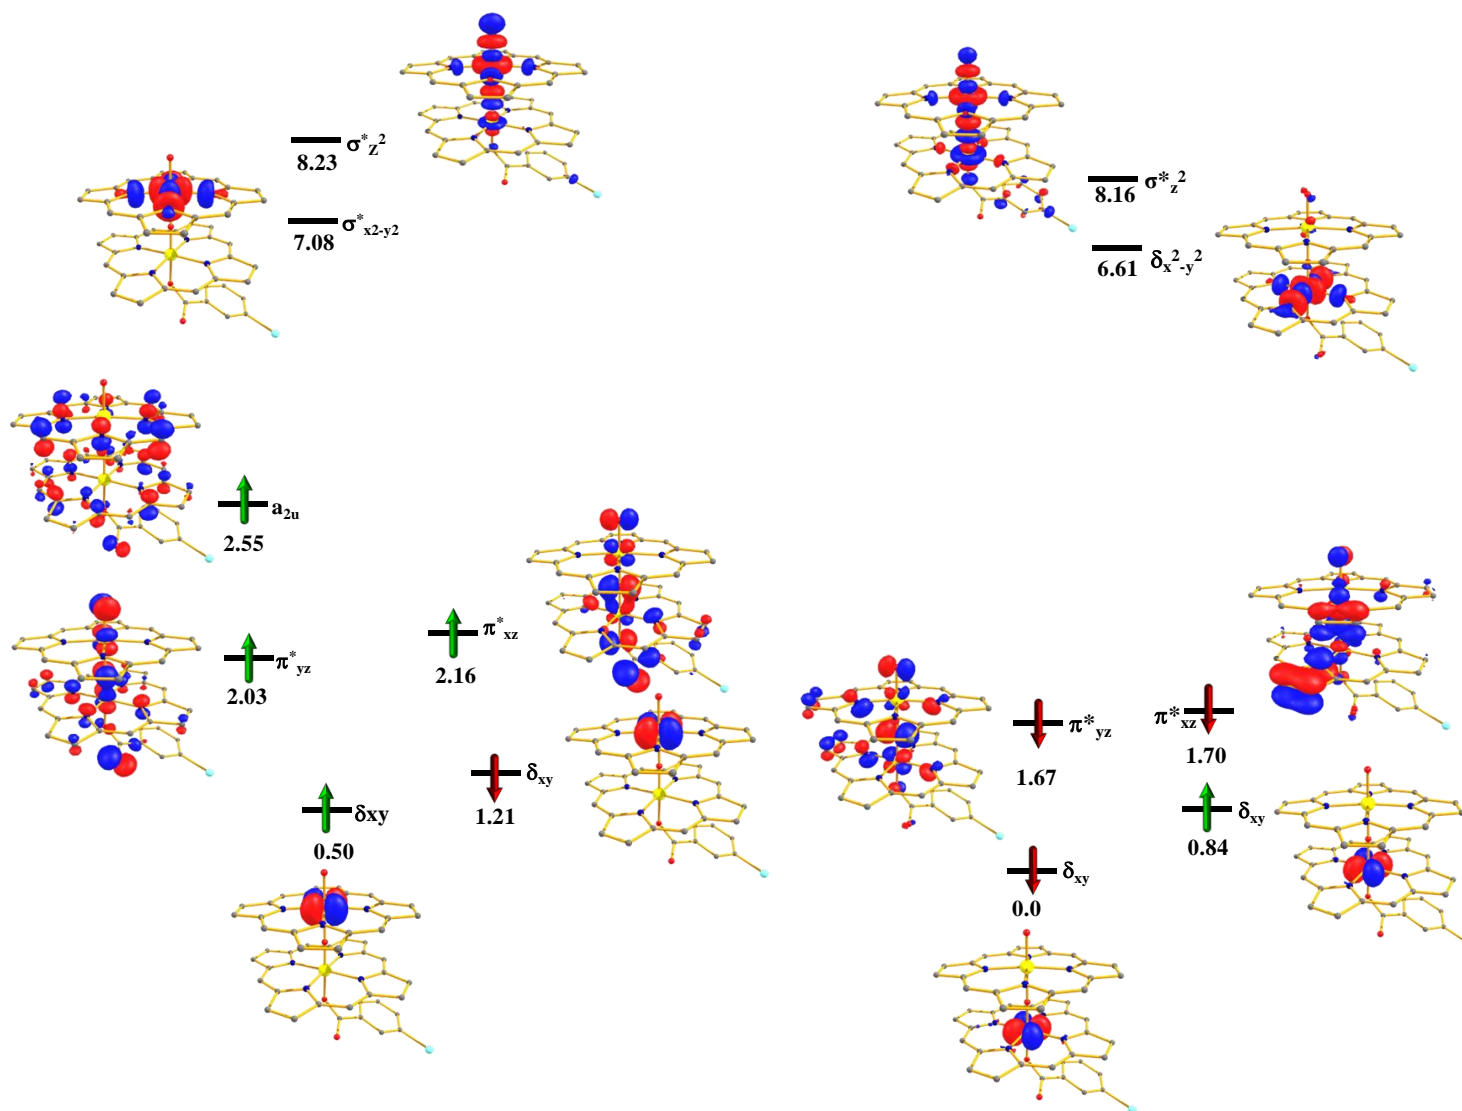

**Figure S3.** Computed Eigen-value plot incorporating energies computed for d-based orbitals for alpha and beta spin of  $^{23}_{(is, is)}$  species (energies are given in eV).

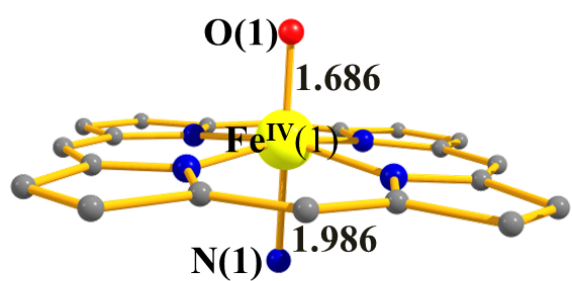

$$\text{Fe}^{\text{IV}}(1)-\text{N}_{\text{avg}} = 2.104$$

$$\angle \text{N}(1)-\text{Fe}^{\text{IV}}(1)-\text{O}(1) = 179.9^\circ$$

(a)

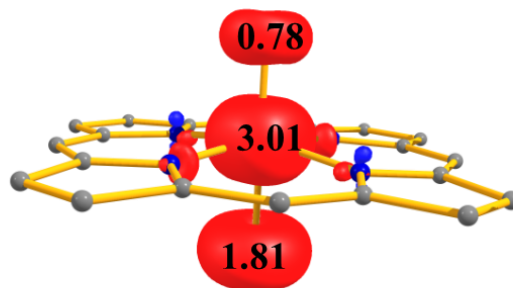

$$\text{Por}(a_{2u}) = -0.605$$

(b)

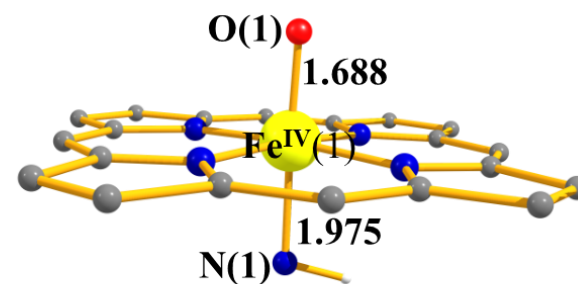

$$\text{Fe}^{\text{IV}}(1)-\text{N}_{\text{avg}} = 2.028$$

$$\angle \text{N}(1)-\text{Fe}^{\text{IV}}(1)-\text{O}(1) = 177.9^\circ$$

(c)

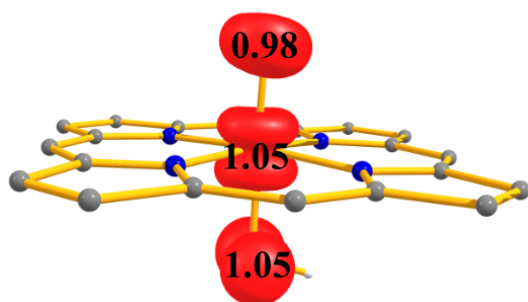

$$\text{Por}(a_{2u}) = 0.257$$

(d)

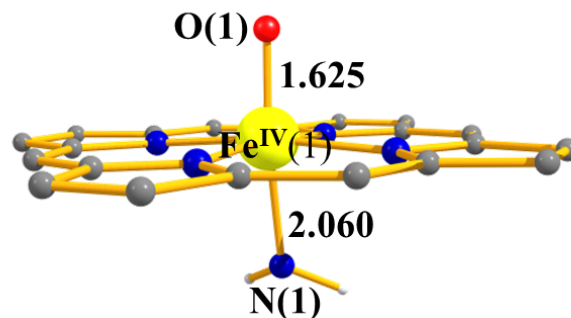

$$\text{Fe}^{\text{IV}}(1)-\text{N}_{\text{avg}} = 2.020$$

$$\angle \text{N}(1)-\text{Fe}^{\text{IV}}(1)-\text{O}(1) = 168.4^\circ$$

(e)

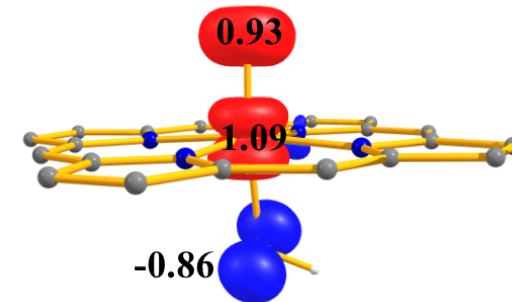

$$\text{Por}(a_{2u}) = 0.549$$

(f)

**Figure S4.** a-b) The optimized structure of  ${}^6\mathbf{4a}_{(hs)}$  and its corresponding spin density plot, c-d) the optimized structure of  ${}^4\mathbf{4b}_{(is)}$  and its corresponding spin density plot, e-f) the optimized structure of  ${}^2\mathbf{4c}_{(is)}$  and its corresponding spin density plot. All the distances are given in Å and angles in  $^\circ$ . All hydrogen atoms are omitted for clarity.

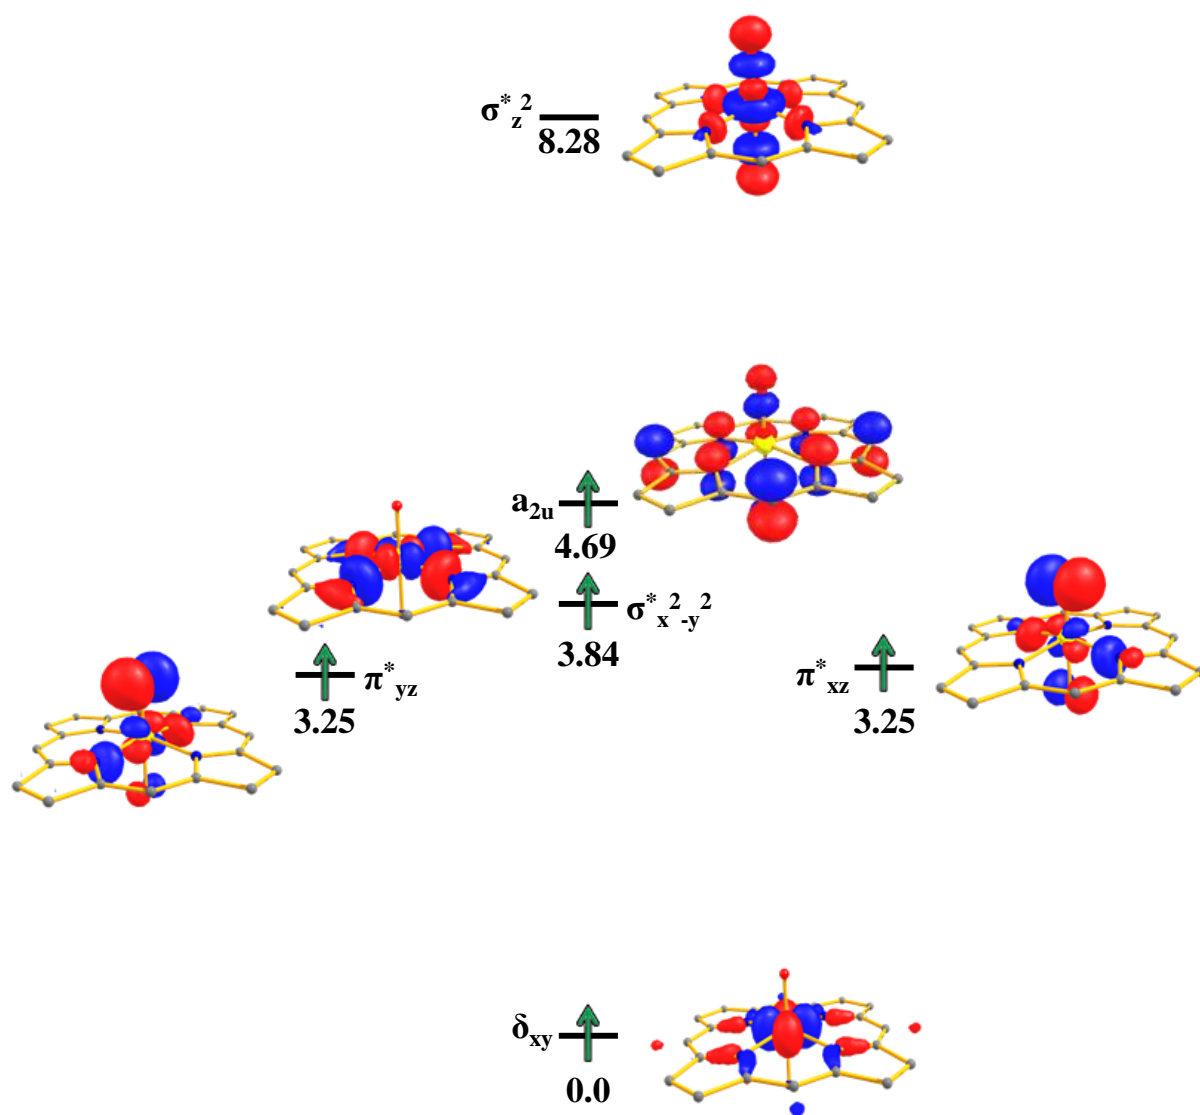

**Figure S5.** Computed Eigen-value plot incorporating energies computed for d-based orbitals for the alpha spin of  ${}^6\mathbf{4a}_{(hs)}$  species (energies are given in eV).



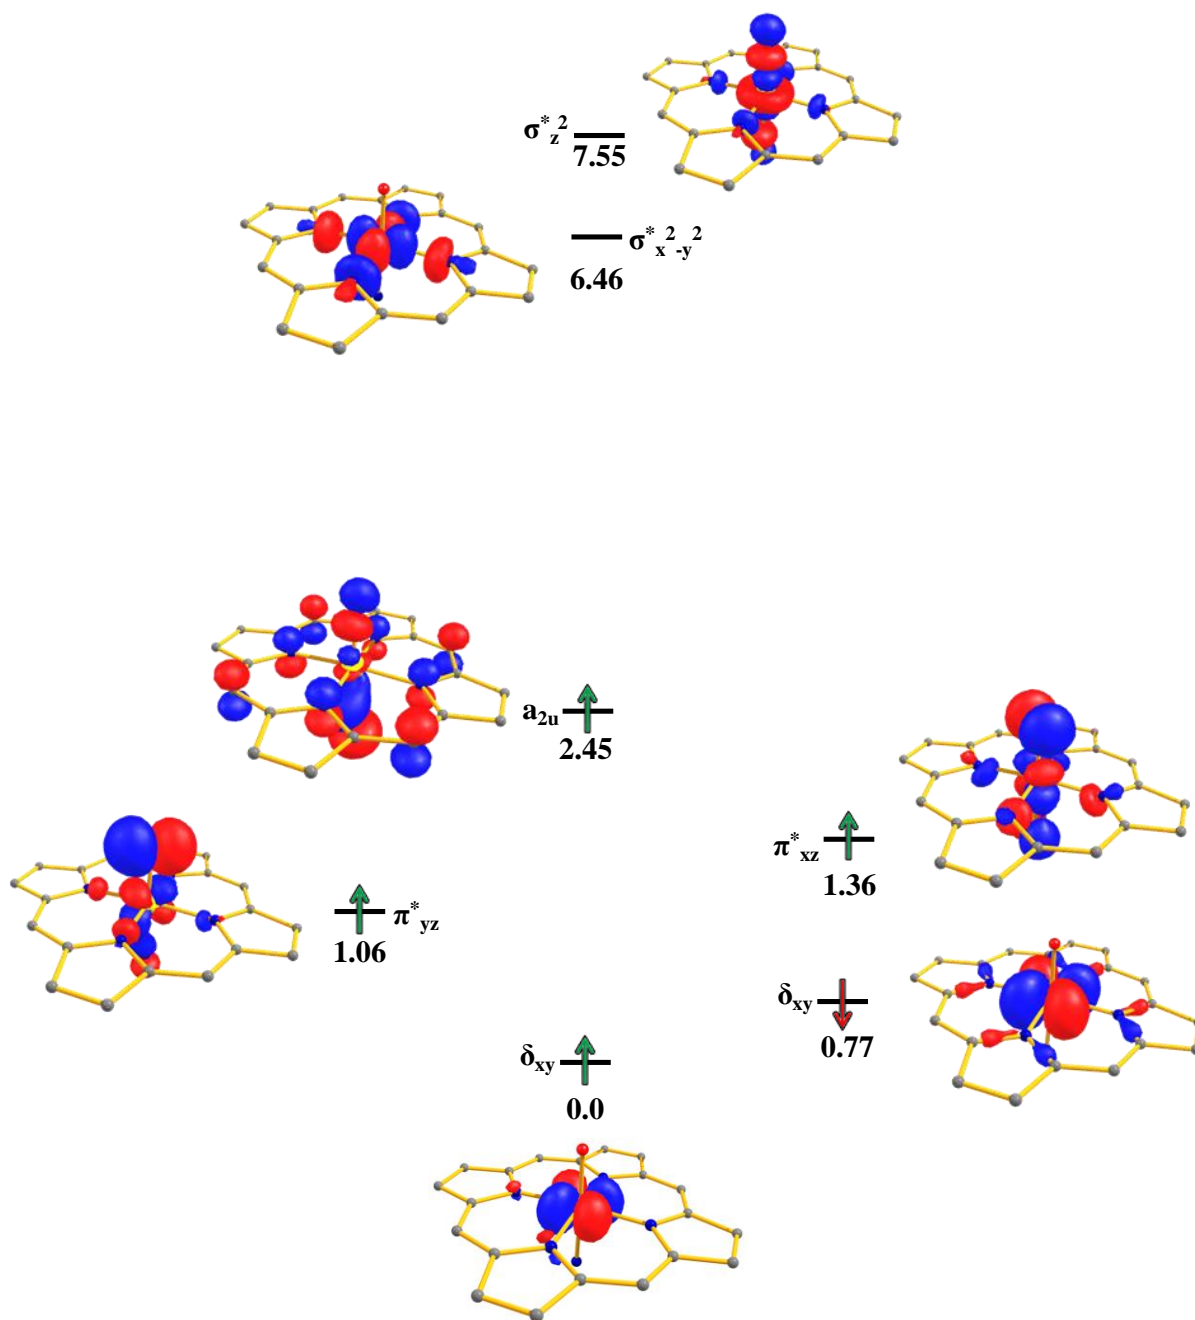

**Figure S6.** Computed Eigen-value plot incorporating energies computed for d-based orbitals for alpha and beta spins of  $4b_{(is)}$  species (energies are given in eV).

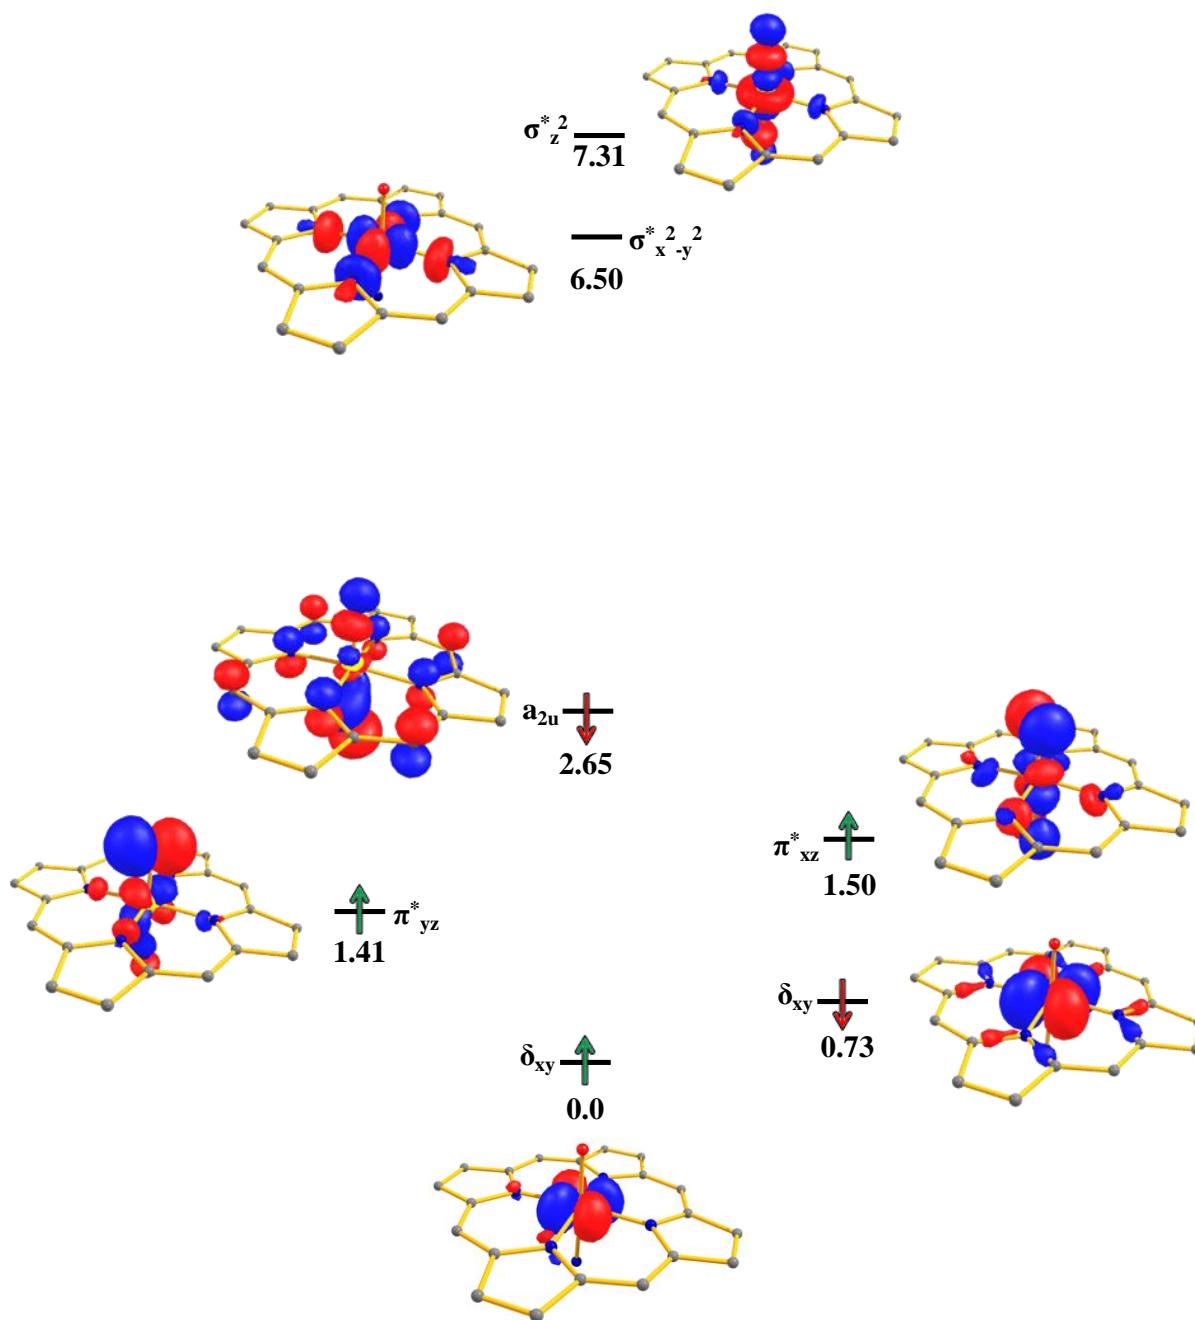

**Figure S7.** Computed Eigen-value plot incorporating energies computed for d-based orbitals for alpha and beta spins of  $24b_{(is)}$  species (energies are given in eV).

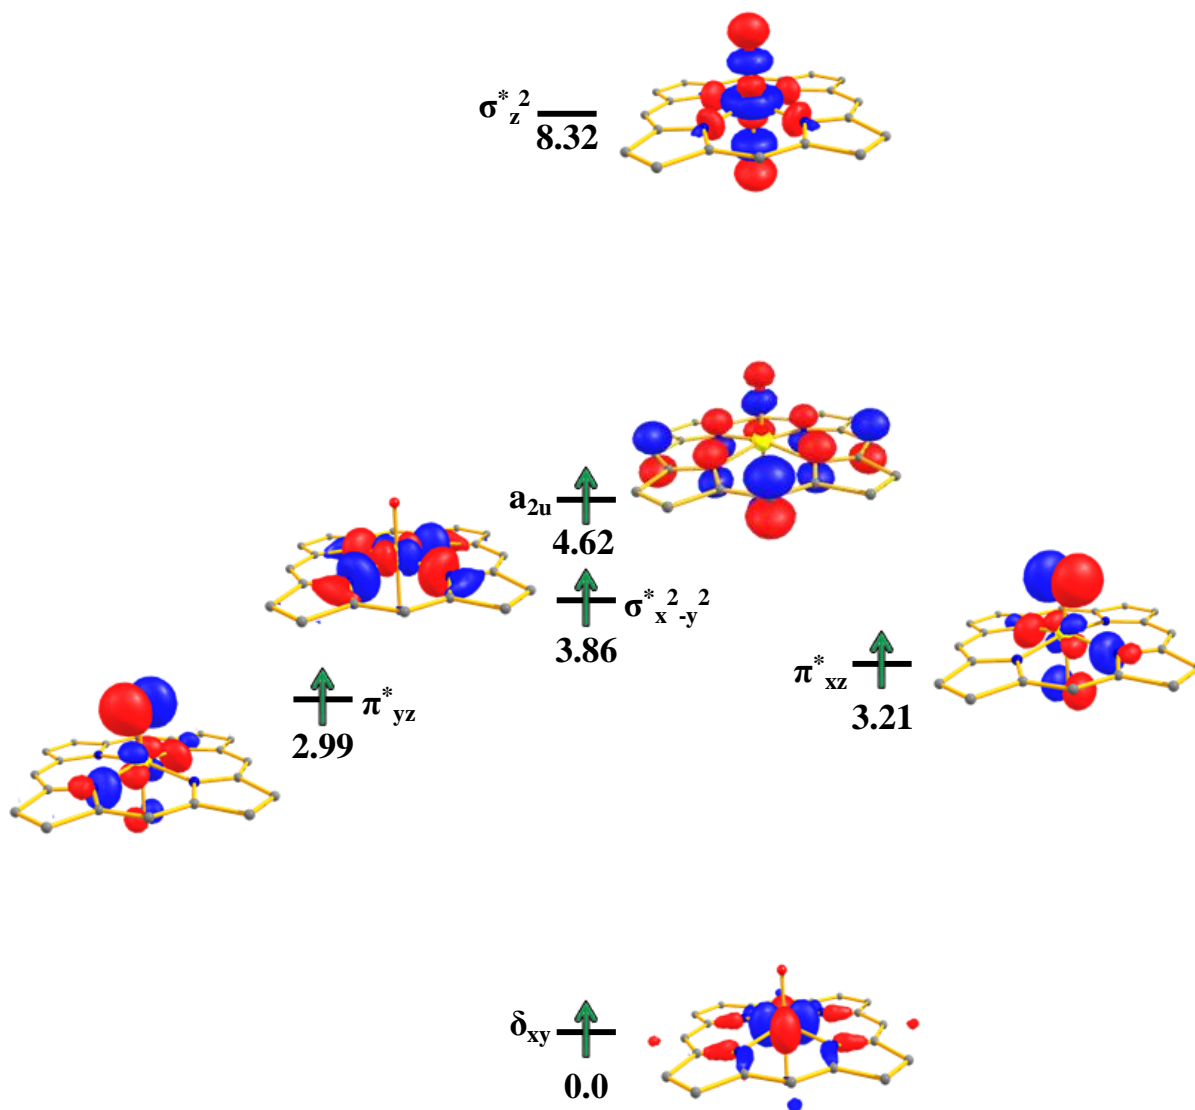

**Figure S8.** Computed Eigen-value plot incorporating energies computed for d-based orbitals for the alpha spin of  ${}^{64}\mathbf{b}_{(\text{ths})}$  species (energies are given in eV).

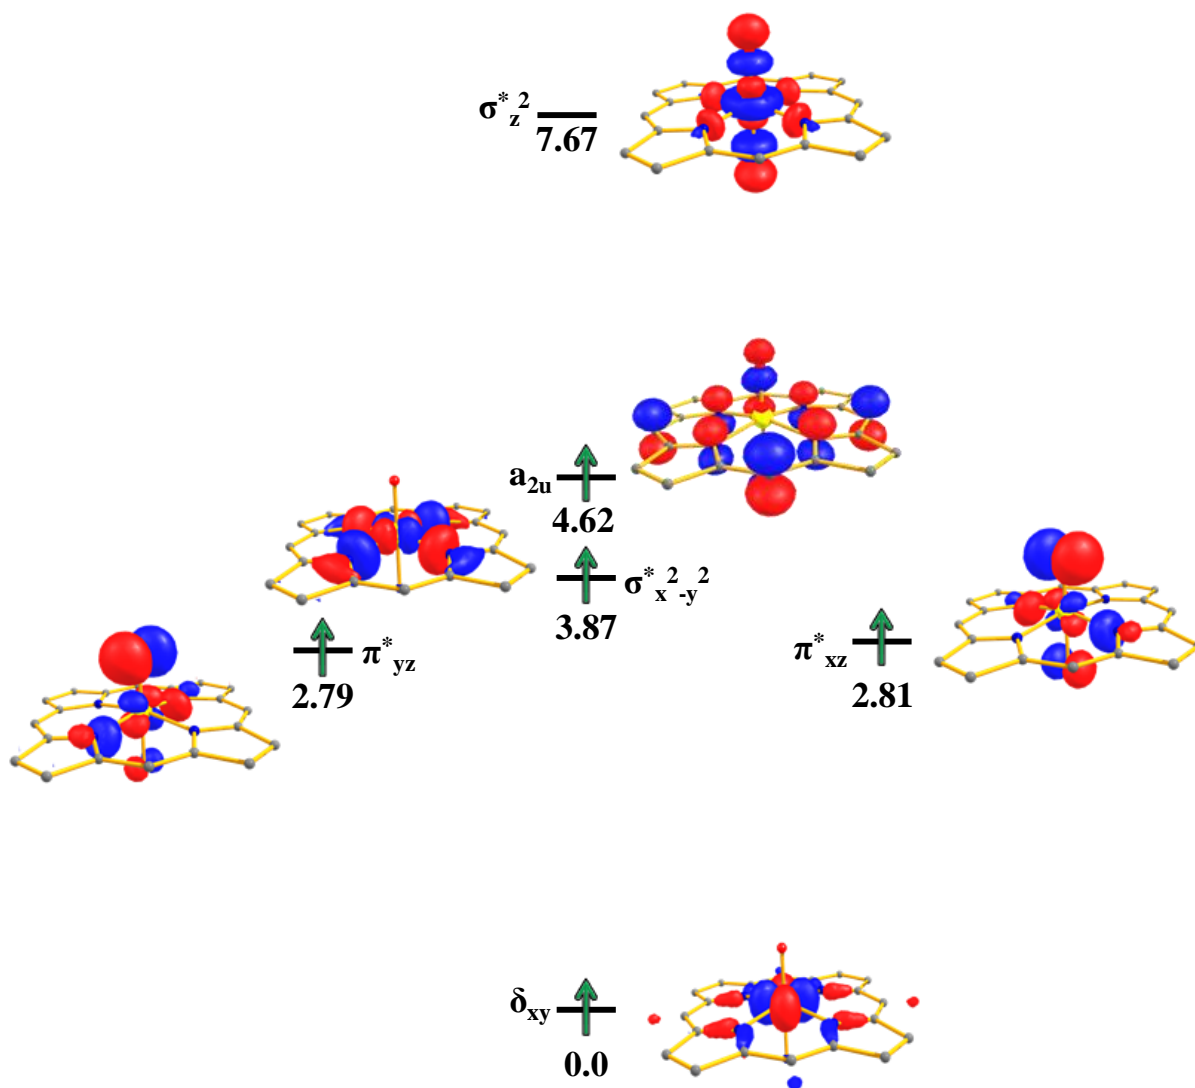

**Figure S9.** Computed Eigen-value plot incorporating energies computed for d-based orbitals for the alpha spin of  ${}^6\mathbf{4c}_{(hs)}$  species (energies are given in eV).

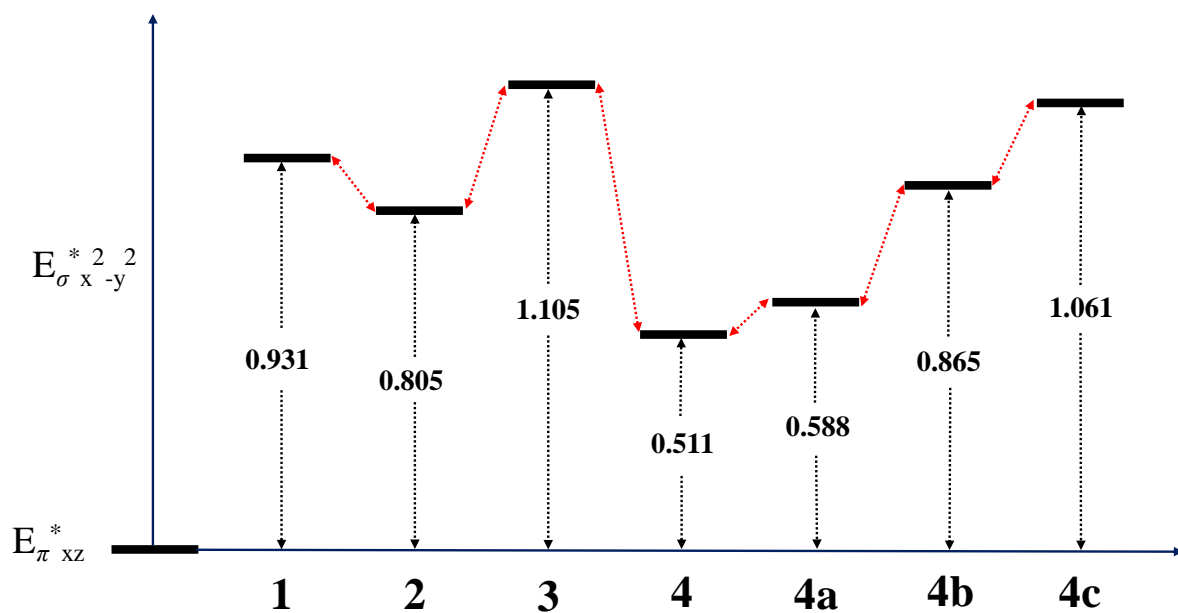

**Figure S10.** We calculated the relative energy of the  $E_{\sigma_{x^2-y^2}}^*$  orbital of all seven species. Here, we have plotted the energy difference between the  $\Delta E(E_{\pi_{xz}}^* - E_{\sigma_{x^2-y^2}}^*)$  versus  $E_{\pi_{xz}}^*$ , and  $E_{\pi_{xz}}^*$  is used as a reference for all species. Here, we have used only high-spin structures for our calculating energy differences.

**Table S3.** B3LYP-D2 computed structural parameters ( $\text{\AA}$ ) of species **4-4c** for a high spin state.

| Species   | $\text{Fe}^{\text{IV}}\text{-O(1)}$ | $\text{Fe}^{\text{IV}}\text{-N}_{\text{ax}}$ |
|-----------|-------------------------------------|----------------------------------------------|
| <b>4</b>  | 1.695                               | 1.920                                        |
| <b>4a</b> | 1.687                               | 1.986                                        |
| <b>4b</b> | 1.680                               | 1.991                                        |
| <b>4c</b> | 1.623                               | 2.097                                        |

**Table S4.** B3LYP-D2 computed spin density and Mulliken charges on the  $a_{2u}$ , O(2)H, N(1) and O(1) atoms for a high spin with the radical up state. The  $\rho$  and  $\sigma$  represent spin density and Mulliken charges, respectively.

| $\rho_{a_{2u}}$ | $\sigma_{a_{2u}}$ | $\rho_{O(2)H}$ | $\sigma_{O(2)H}$ | $\rho_{O(1)}$          | $\sigma_{O(1)}$         |
|-----------------|-------------------|----------------|------------------|------------------------|-------------------------|
| <b>1</b>        |                   |                |                  |                        |                         |
| 0.224           | -0.927            | 0.009          | -0.481           | 0.787                  | -0.376                  |
| <b>2</b>        |                   |                |                  |                        |                         |
| 1.143           | -0.005            | 0.117          | -0.447           | 0.829                  | -0.292                  |
| <b>3</b>        |                   |                |                  |                        |                         |
| 0.675           | -0.217            | -0.002         | -0.321           | 0.681                  | -0.311                  |
| 0.866           | -0.012            |                |                  | 0.035 ( <i>m</i> -CBA) | -1.255 ( <i>m</i> -CBA) |
| $\rho_{a_{2u}}$ | $\sigma_{a_{2u}}$ | $\rho_{N(1)}$  | $\sigma_{N(1)}$  | $\rho_{O(1)}$          | $\sigma_{O(1)}$         |
| <b>4</b>        |                   |                |                  |                        |                         |
| 0.271           | -0.570            | 0.074          | -0.222           | 0.968                  | -0.535                  |
| 0.484           | -0.775            |                |                  | 0.163 ( <i>m</i> -CBA) | -1.255 ( <i>m</i> -CBA) |
| <b>4a</b>       |                   |                |                  |                        |                         |
| -0.605          | -1.738            | 1.812          | -0.191           | 0.783                  | -0.499                  |
| <b>4b</b>       |                   |                |                  |                        |                         |
| 0.257           | -0.866            | 0.861          | -0.256           | 0.861                  | -0.463                  |
| <b>4c</b>       |                   |                |                  |                        |                         |
| 0.549           | -0.350            | 0.828          | -0.176           | 0.716                  | -0.229                  |
|                 |                   |                |                  |                        |                         |

**Table S5.** B3LYP-D2 computed optimized energy with zero-point energy corrections (ZPE) of possible spin states of species **1**.

| Spin states                         | Energy(kJ/mol) |
|-------------------------------------|----------------|
| <b>1</b>                            |                |
| $^5\mathbf{1}_{(hs)}$               | 38.6           |
| $^3\mathbf{1}_{(is)}$               | 0.0            |
| $^1\mathbf{1}_{(ls)}$               | 121.4          |
| <b>1-ts1</b>                        |                |
| $\mathbf{1-}^5\mathbf{ts1}_{(hs)}$  | 46.8           |
| $\mathbf{1-}^3\mathbf{ts1}_{(is)}$  | 0.0            |
| $\mathbf{1-}^1\mathbf{ts1}_{(ls)}$  | 125.4          |
| <b>1-int1</b>                       |                |
| $\mathbf{1-}^7\mathbf{int1}_{(hs)}$ | 21.9           |
| $\mathbf{1-}^5\mathbf{int1}_{(hs)}$ | 22.6           |
| $\mathbf{1-}^5\mathbf{int1}_{(is)}$ | 42.1           |
| $\mathbf{1-}^3\mathbf{int1}_{(is)}$ | 43.2           |
| $\mathbf{1-}^3\mathbf{int1}_{(ls)}$ | 0.0            |
| $\mathbf{1-}^1\mathbf{int1}_{(ls)}$ | 2.5            |
| <b>1-ts2</b>                        |                |
| $\mathbf{1-}^7\mathbf{ts2}_{(hs)}$  | 30.7           |
| $\mathbf{1-}^5\mathbf{ts2}_{(hs)}$  | 7.1            |
| $\mathbf{1-}^5\mathbf{ts2}_{(is)}$  | 32.4           |
| $\mathbf{1-}^3\mathbf{ts2}_{(is)}$  | 36.9           |
| $\mathbf{1-}^3\mathbf{ts2}_{(ls)}$  | 12.2           |
| $\mathbf{1-}^1\mathbf{ts2}_{(ls)}$  | 0.0            |
| <b>1-P</b>                          |                |
| $\mathbf{1-}^5\mathbf{P}_{(hs)}$    | 0.0            |
| $\mathbf{1-}^3\mathbf{P}_{(is)}$    | 54.3           |
| $\mathbf{1-}^1\mathbf{P}_{(ls)}$    | 21.9           |

**Table S6.** B3LYP-D2 computed structural parameters (Å) of species **1**.

| Spin state                                         | Fe <sup>IV</sup> (1)-<br>O(1) | Fe <sup>IV</sup> (1)-<br>N <sub>avg</sub> | Fe <sup>IV</sup> (1)-<br>O(2) | O(1)-<br>H | H-C   | O(1)-<br>C | ∠Fe <sup>IV</sup> (1)-<br>O(1)-H | ∠Fe <sup>IV</sup> (1)-<br>O(1)-C |
|----------------------------------------------------|-------------------------------|-------------------------------------------|-------------------------------|------------|-------|------------|----------------------------------|----------------------------------|
| <b>1</b>                                           |                               |                                           |                               |            |       |            |                                  |                                  |
| <sup>5</sup> <b>1</b> <sub>(hs)</sub>              | 1.689                         | 2.086                                     | 1.911                         | -          | -     | -          | -                                | -                                |
| <sup>3</sup> <b>1</b> <sub>(is)</sub>              | 1.699                         | 2.026                                     | 1.911                         | -          | -     | -          | -                                | -                                |
| <sup>1</sup> <b>1</b> <sub>(ls)</sub>              | 1.700                         | 2.028                                     | 1.886                         | -          | -     | -          | -                                | -                                |
| <b>1-ts1</b>                                       |                               |                                           |                               |            |       |            |                                  |                                  |
| <b>1</b> <sup>-5</sup> <b>ts1</b> <sub>(hs)</sub>  | 1.837                         | 2.084                                     | 1.876                         | 1.077      | 1.525 | 2.602      | 114.6                            | 114.7                            |
| <b>1</b> <sup>-3</sup> <b>ts1</b> <sub>(is)</sub>  | 1.845                         | 2.024                                     | 1.879                         | 1.072      | 1.529 | 2.601      | 114.2                            | 113.7                            |
| <b>1</b> <sup>-1</sup> <b>ts1</b> <sub>(ls)</sub>  | 1.847                         | 2.022                                     | 1.888                         | 1.041      | 1.575 | 2.296      | 115.9                            | 115.5                            |
| <b>1-int1</b>                                      |                               |                                           |                               |            |       |            |                                  |                                  |
| <b>1</b> <sup>-7</sup> <b>int1</b> <sub>(hs)</sub> | 1.969                         | 2.099                                     | 1.941                         | 0.980      | 3.198 | 3.169      | 112.8                            | 117.5                            |
| <b>1</b> <sup>-5</sup> <b>int1</b> <sub>(hs)</sub> | 1.969                         | 2.099                                     | 1.941                         | 0.980      | 3.198 | 3.173      | 112.8                            | 117.4                            |
| <b>1</b> <sup>-5</sup> <b>int1</b> <sub>(is)</sub> | 1.866                         | 2.086                                     | 1.848                         | 0.980      | 3.216 | 3.228      | 109.0                            | 114.3                            |
| <b>1</b> <sup>-3</sup> <b>int1</b> <sub>(is)</sub> | 1.866                         | 2.086                                     | 1.848                         | 0.980      | 3.215 | 3.231      | 109.0                            | 114.2                            |
| <b>1</b> <sup>-3</sup> <b>int1</b> <sub>(ls)</sub> | 1.890                         | 2.024                                     | 1.873                         | 0.981      | 3.034 | 3.214      | 107.3                            | 115.1                            |
| <b>1</b> <sup>-1</sup> <b>int1</b> <sub>(ls)</sub> | 1.891                         | 2.024                                     | 1.873                         | 0.981      | 3.030 | 3.218      | 107.3                            | 115.0                            |
| <b>1-ts2</b>                                       |                               |                                           |                               |            |       |            |                                  |                                  |
| <b>1</b> <sup>-7</sup> <b>ts2</b> <sub>(hs)</sub>  | 2.044                         | 2.097                                     | 1.913                         | 0.980      | 2.568 | 2.254      | 110.3                            | 119.8                            |
| <b>1</b> <sup>-5</sup> <b>ts2</b> <sub>(hs)</sub>  | 1.995                         | 2.098                                     | 1.949                         | 0.980      | 2.541 | 2.378      | 111.1                            | 120.3                            |
| <b>1</b> <sup>-5</sup> <b>ts2</b> <sub>(is)</sub>  | 1.910                         | 2.094                                     | 1.864                         | 0.982      | 2.654 | 2.253      | 109.4                            | 133.1                            |
| <b>1</b> <sup>-3</sup> <b>ts2</b> <sub>(is)</sub>  | 1.914                         | 2.075                                     | 1.871                         | 0.981      | 2.498 | 2.251      | 107.0                            | 120.5                            |
| <b>1</b> <sup>-3</sup> <b>ts2</b> <sub>(ls)</sub>  | 1.944                         | 2.025                                     | 1.857                         | 0.982      | 2.506 | 2.164      | 107.0                            | 121.6                            |
| <b>1</b> <sup>-1</sup> <b>ts2</b> <sub>(ls)</sub>  | 1.913                         | 2.021                                     | 1.876                         | 0.982      | 2.479 | 2.230      | 107.3                            | 118.6                            |
| <b>1-P</b>                                         |                               |                                           |                               |            |       |            |                                  |                                  |
| <b>1</b> <sup>-5</sup> <b>P</b> <sub>(hs)</sub>    | 3.586                         | 2.163                                     | 1.904                         | 0.986      | 2.011 | 1.449      | 29.8                             | 84.2                             |
| <b>1</b> <sup>-3</sup> <b>P</b> <sub>(is)</sub>    | 3.382                         | 2.027                                     | 1.924                         | 0.984      | 2.013 | 1.453      | 37.3                             | 81.6                             |
| <b>1</b> <sup>-1</sup> <b>P</b> <sub>(ls)</sub>    | 2.175                         | 2.016                                     | 1.915                         | 0.979      | 2.036 | 1.462      | 95.6                             | 115.6                            |



**Table S7.** B3LYP-D2 computed spin densities of the complex **1**.

| Spin states                               | Fe <sup>IV</sup> (1) | O(1)  | O(2) | H     | C     |
|-------------------------------------------|----------------------|-------|------|-------|-------|
| <b>1</b>                                  |                      |       |      |       |       |
| <sup>5</sup> <b>1</b> <sub>(hs)</sub>     | 2.98                 | 0.79  | 0.01 | -     | -     |
| <sup>3</sup> <b>1</b> <sub>(is)</sub>     | 1.05                 | 0.97  | 0.08 | -     | -     |
| <sup>1</sup> <b>1</b> <sub>(ls)</sub>     | 0.00                 | 0.00  | 0.00 | -     | -     |
| <b>1-ts1</b>                              |                      |       |      |       |       |
| <b>1-<sup>5</sup>ts1</b> <sub>(hs)</sub>  | 2.81                 | 0.37  | 0.04 | -0.08 | 0.79  |
| <b>1-<sup>3</sup>ts1</b> <sub>(is)</sub>  | 0.88                 | 0.46  | 0.12 | -0.08 | 0.80  |
| <b>1-<sup>1</sup>ts1</b> <sub>(ls)</sub>  | 0.00                 | 0.00  | 0.00 | 0.00  | 0.00  |
| <b>1-int1</b>                             |                      |       |      |       |       |
| <b>1-<sup>7</sup>int1</b> <sub>(hs)</sub> | 4.06                 | 0.28  | 0.32 | 0.00  | 1.17  |
| <b>1-<sup>5</sup>int1</b> <sub>(hs)</sub> | 4.05                 | 0.28  | 0.32 | 0.00  | -1.16 |
| <b>1-<sup>5</sup>int1</b> <sub>(is)</sub> | 2.74                 | 0.05  | 0.08 | 0.00  | 1.17  |
| <b>1-<sup>3</sup>int1</b> <sub>(is)</sub> | 2.73                 | 0.05  | 0.08 | 0.00  | -1.16 |
| <b>1-<sup>3</sup>int1</b> <sub>(ls)</sub> | 0.88                 | 0.09  | 0.11 | 0.00  | 1.16  |
| <b>1-<sup>1</sup>int1</b> <sub>(ls)</sub> | 0.87                 | 0.09  | 0.11 | 0.00  | -1.16 |
| <b>1-ts2</b>                              |                      |       |      |       |       |
| <b>1-<sup>7</sup>ts2</b> <sub>(hs)</sub>  | 4.09                 | 0.21  | 0.35 | 0.00  | 0.81  |
| <b>1-<sup>5</sup>ts2</b> <sub>(hs)</sub>  | 4.00                 | 0.24  | 0.29 | 0.00  | -0.95 |
| <b>1-<sup>5</sup>ts2</b> <sub>(is)</sub>  | 3.01                 | -0.06 | 0.09 | 0.00  | 0.93  |
| <b>1-<sup>3</sup>ts2</b> <sub>(is)</sub>  | 2.56                 | 0.10  | 0.10 | 0.00  | -0.88 |
| <b>1-<sup>3</sup>ts2</b> <sub>(ls)</sub>  | 0.99                 | 0.05  | 0.12 | 0.00  | 0.77  |
| <b>1-<sup>1</sup>ts2</b> <sub>(ls)</sub>  | 0.75                 | 0.07  | 0.09 | 0.00  | -0.86 |
| <b>1-P</b>                                |                      |       |      |       |       |
| <b>1-<sup>5</sup>P</b> <sub>(hs)</sub>    | 3.46                 | 0.00  | 0.17 | 0.00  | 0.00  |
| <b>1-<sup>3</sup>P</b> <sub>(is)</sub>    | 2.30                 | 0.00  | 0.30 | 0.00  | 0.00  |
| <b>1-<sup>1</sup>P</b> <sub>(ls)</sub>    | 0.00                 | 0.00  | 0.00 | 0.00  | 0.00  |

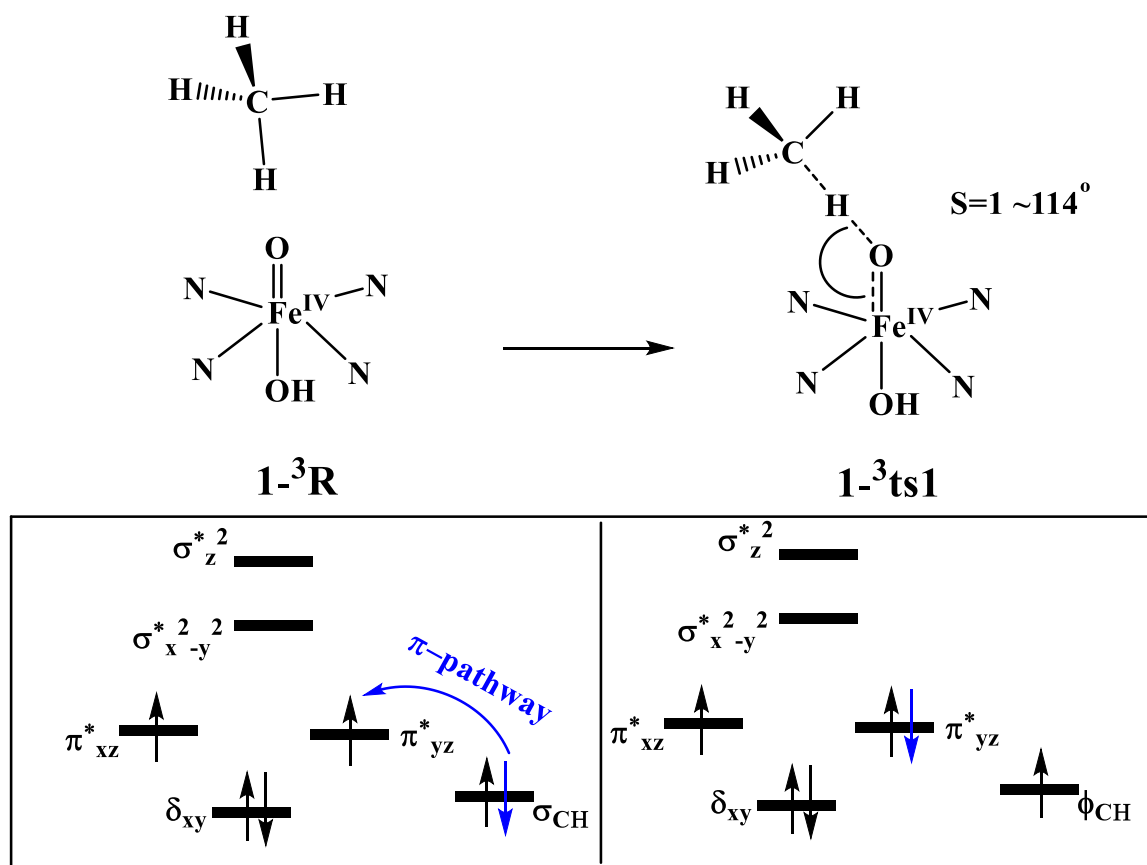

**Figure S11.** Orbitals and their occupancy changes during the hydrogen atom abstraction from methane.

**Table S8.** B3LYP-D2 computed optimized energy with zero-point energy corrections (ZPE) of possible spin states of complex **2**.

| Spin states                            | Energy(kJ/mol) |
|----------------------------------------|----------------|
| <b>2</b>                               |                |
| ${}^6\mathbf{2}_{(hs)}$                | 26.1           |
| ${}^4\mathbf{2}_{(hs)}$                | 27.3           |
| ${}^4\mathbf{2}_{(is)}$                | 0.0            |
| ${}^2\mathbf{2}_{(is)}$                | 6.8            |
| ${}^2\mathbf{2}_{(ls)}$                | 7.8            |
| <b>2-ts1</b>                           |                |
| ${}^2\text{-}{}^6\mathbf{ts1}_{(hs)}$  | 70.8           |
| ${}^2\text{-}{}^4\mathbf{ts1}_{(hs)}$  | 64.2           |
| ${}^2\text{-}{}^4\mathbf{ts1}_{(is)}$  | 24.6           |
| ${}^2\text{-}{}^2\mathbf{ts1}_{(is)}$  | 0.0            |
| ${}^2\text{-}{}^2\mathbf{ts1}_{(ls)}$  | 39.5           |
| <b>2-int1</b>                          |                |
| ${}^2\text{-}{}^6\mathbf{int1}_{(hs)}$ | 57.2           |
| ${}^2\text{-}{}^4\mathbf{int1}_{(hs)}$ | 82.4           |
| ${}^2\text{-}{}^4\mathbf{int1}_{(is)}$ | 0.0            |
| ${}^2\text{-}{}^2\mathbf{int1}_{(is)}$ | 0.6            |
| ${}^2\text{-}{}^2\mathbf{int1}_{(ls)}$ | 49.7           |
| <b>2-ts2</b>                           |                |
| ${}^2\text{-}{}^6\mathbf{ts2}_{(hs)}$  | 61.6           |
| ${}^2\text{-}{}^4\mathbf{ts2}_{(hs)}$  | 128.3          |
| ${}^2\text{-}{}^4\mathbf{ts2}_{(is)}$  | 6.5            |
| ${}^2\text{-}{}^2\mathbf{ts2}_{(is)}$  | 0.0            |
| ${}^2\text{-}{}^2\mathbf{ts2}_{(ls)}$  | 38.5           |
| <b>2-P</b>                             |                |
| ${}^2\text{-}{}^6\mathbf{P}_{(hs)}$    | 0.0            |
| ${}^2\text{-}{}^4\mathbf{P}_{(is)}$    | 70.5           |
| ${}^2\text{-}{}^2\mathbf{P}_{(ls)}$    | 6.4            |

**Table S9.** B3LYP-D2 computed structural parameters (Å) of the complex **2**.

| Spin state                                | Fe <sup>IV</sup> (1)-<br>O(1) | Fe <sup>IV</sup> (1)-<br>N <sub>avg</sub> | Fe <sup>IV</sup> (1)-<br>O(2) | O(1)-<br>H | H-C   | O(1)-<br>C | ∠Fe <sup>IV</sup> (1)-<br>O(1)-H | ∠Fe <sup>IV</sup> (1)-<br>O(1)-C |
|-------------------------------------------|-------------------------------|-------------------------------------------|-------------------------------|------------|-------|------------|----------------------------------|----------------------------------|
| <b>2</b>                                  |                               |                                           |                               |            |       |            |                                  |                                  |
| <sup>6</sup> <b>2</b> <sub>(hs)</sub>     | 1.684                         | 2.083                                     | 1.905                         | -          | -     | -          | -                                | -                                |
| <sup>4</sup> <b>2</b> <sub>(hs)</sub>     | 1.682                         | 2.083                                     | 1.926                         | -          | -     | -          | -                                | -                                |
| <sup>4</sup> <b>2</b> <sub>(is)</sub>     | 1.687                         | 2.019                                     | 1.933                         | -          | -     | -          | -                                | -                                |
| <sup>2</sup> <b>2</b> <sub>(is)</sub>     | 1.661                         | 2.019                                     | 1.971                         |            |       |            |                                  |                                  |
| <sup>2</sup> <b>2</b> <sub>(ls)</sub>     | 1.661                         | 2.019                                     | 1.972                         |            |       |            |                                  |                                  |
| <b>2-ts1</b>                              |                               |                                           |                               |            |       |            |                                  |                                  |
| <b>2-<sup>6</sup>ts1</b> <sub>(hs)</sub>  | 1.788                         | 2.072                                     | 1.827                         | 1.165      | 1.368 | 2.532      | 116.9                            | 118.5                            |
| <b>2-<sup>4</sup>ts1</b> <sub>(hs)</sub>  | 1.785                         | 2.071                                     | 1.824                         | 1.169      | 1.347 | 2.514      | 115.1                            | 114.5                            |
| <b>2-<sup>4</sup>ts1</b> <sub>(is)</sub>  | 1.799                         | 2.008                                     | 1.817                         | 1.178      | 1.349 | 2.526      | 115.4                            | 115.7                            |
| <b>2-<sup>2</sup>ts1</b> <sub>(is)</sub>  | 1.776                         | 2.009                                     | 1.818                         | 1.156      | 1.362 | 2.518      | 114.9                            | 114.0                            |
| <b>2-<sup>2</sup>ts1</b> <sub>(ls)</sub>  | 1.776                         | 2.012                                     | 1.819                         | 1.157      | 1.361 | 2.516      | 115.3                            | 114.3                            |
| <b>2-int1</b>                             |                               |                                           |                               |            |       |            |                                  |                                  |
| <b>2-<sup>6</sup>int1</b> <sub>(hs)</sub> | 1.803                         | 2.072                                     | 1.817                         | 0.994      | 2.042 | 3.024      | 113.8                            | 118.0                            |
| <b>2-<sup>4</sup>int1</b> <sub>(hs)</sub> | 1.799                         | 2.072                                     | 1.819                         | 0.997      | 1.994 | 2.979      | 114.3                            | 116.5                            |
| <b>2-<sup>4</sup>int1</b> <sub>(is)</sub> | 1.799                         | 2.014                                     | 1.811                         | 0.990      | 2.077 | 3.060      | 114.2                            | 116.9                            |
| <b>2-<sup>2</sup>int1</b> <sub>(is)</sub> | 1.795                         | 2.014                                     | 1.813                         | 0.993      | 2.028 | 3.017      | 114.4                            | 116.0                            |
| <b>2-<sup>2</sup>int1</b> <sub>(ls)</sub> | 1.796                         | 2.014                                     | 1.808                         | 1.000      | 1.951 | 2.948      | 114.4                            | 116.8                            |
| <b>2-ts2</b>                              |                               |                                           |                               |            |       |            |                                  |                                  |
| <b>2-<sup>6</sup>ts2</b> <sub>(hs)</sub>  | 1.849                         | 2.074                                     | 1.826                         | 0.983      | 2.523 | 2.738      | 109.7                            | 124.6                            |
| <b>2-<sup>4</sup>ts2</b> <sub>(hs)</sub>  | 1.814                         | 2.071                                     | 1.813                         | 0.983      | 2.368 | 2.842      | 112.8                            | 115.6                            |
| <b>2-<sup>4</sup>ts2</b> <sub>(is)</sub>  | 1.849                         | 2.019                                     | 1.824                         | 0.982      | 2.714 | 2.457      | 111.2                            | 131.8                            |
| <b>2-<sup>2</sup>ts2</b> <sub>(is)</sub>  | 1.813                         | 2.014                                     | 1.810                         | 0.981      | 2.593 | 2.780      | 113.3                            | 118.9                            |
| <b>2-<sup>2</sup>ts2</b> <sub>(ls)</sub>  | 1.851                         | 2.019                                     | 1.826                         | 0.982      | 2.718 | 2.450      | 111.2                            | 131.9                            |
| <b>2-P</b>                                |                               |                                           |                               |            |       |            |                                  |                                  |
| <b>2-<sup>6</sup>P</b> <sub>(hs)</sub>    | 2.369                         | 2.091                                     | 1.841                         | 0.978      | 2.041 | 1.459      | 97.4                             | 120.8                            |
| <b>2-<sup>4</sup>P</b> <sub>(is)</sub>    | 2.380                         | 2.029                                     | 1.885                         | 0.978      | 2.037 | 1.461      | 97.4                             | 117.1                            |
| <b>2-<sup>2</sup>P</b> <sub>(ls)</sub>    | 2.062                         | 2.017                                     | 1.804                         | 0.976      | 2.056 | 1.465      | 107.6                            | 121.6                            |

**Table S10.** B3LYP-D2 computed spin densities of the complex **2**.

| Spin states                         | Fe <sup>IV</sup> (1) | O(1)  | O(2)  | H     | C     | a <sub>2u</sub> |
|-------------------------------------|----------------------|-------|-------|-------|-------|-----------------|
| <b>2</b>                            |                      |       |       |       |       |                 |
| <sup>6</sup> 2 <sub>(hs)</sub>      | 2.91                 | 0.83  | 0.12  | -     | -     | 1.14            |
| <sup>4</sup> 2 <sub>(hs)</sub>      | 3.02                 | 0.77  | -0.14 | -     | -     | -0.66           |
| <sup>4</sup> 2 <sub>(is)</sub>      | 0.99                 | 1.07  | 0.38  | -     | -     | 0.56            |
| <sup>2</sup> 2 <sub>(is)</sub>      | 1.06                 | 0.97  | -0.46 |       |       | -0.59           |
| <sup>2</sup> 2 <sub>(ls)</sub>      | 1.06                 | 0.97  | -0.46 |       |       | -0.59           |
| <b>2-ts1</b>                        |                      |       |       |       |       |                 |
| <sup>2-6</sup> ts1 <sub>(hs)</sub>  | 3.19                 | 0.57  | 0.22  | -0.04 | 0.65  | 0.48            |
| <sup>2-4</sup> ts1 <sub>(hs)</sub>  | 3.29                 | -0.25 | 0.15  | 0.04  | -0.62 | 0.33            |
| <sup>2-4</sup> ts1 <sub>(is)</sub>  | 1.50                 | 0.73  | 0.28  | -0.05 | 0.65  | -0.02           |
| <sup>2-2</sup> ts1 <sub>(is)</sub>  | 1.62                 | -0.15 | 0.22  | 0.04  | -0.65 | -0.15           |
| <sup>2-2</sup> ts1 <sub>(ls)</sub>  | 1.62                 | -0.15 | 0.22  | 0.04  | -0.65 | -0.15           |
| <b>2-int1</b>                       |                      |       |       |       |       |                 |
| <sup>2-6</sup> int1 <sub>(hs)</sub> | 3.28                 | 0.17  | 0.23  | 0.01  | 1.08  | 0.38            |
| <sup>2-4</sup> int1 <sub>(hs)</sub> | 3.29                 | 0.14  | 0.14  | -0.00 | -1.07 | 0.36            |
| <sup>2-4</sup> int1 <sub>(is)</sub> | 1.61                 | 0.32  | 0.25  | -0.00 | 1.09  | -0.06           |
| <sup>2-2</sup> int1 <sub>(is)</sub> | 1.62                 | 0.22  | 0.23  | -0.00 | -1.08 | -0.07           |
| <sup>2-2</sup> int1 <sub>(ls)</sub> | -0.07                | 0.41  | -0.28 | -0.01 | 1.06  | 0.03            |
| <b>2-ts2</b>                        |                      |       |       |       |       |                 |
| <sup>2-6</sup> ts2 <sub>(hs)</sub>  | 3.49                 | -0.02 | 0.25  | 0.02  | 1.05  | 0.37            |
| <sup>2-4</sup> ts2 <sub>(hs)</sub>  | 3.22                 | 0.21  | 0.12  | -0.00 | -1.08 | 0.37            |
| <sup>2-4</sup> ts2 <sub>(is)</sub>  | 1.94                 | 0.06  | 0.29  | -0.02 | 0.99  | -0.13           |
| <sup>2-2</sup> ts2 <sub>(is)</sub>  | 1.51                 | 0.28  | 0.24  | -0.00 | -1.08 | -0.14           |
| <sup>2-2</sup> ts2 <sub>(ls)</sub>  | 1.53                 | 0.29  | 0.22  | -0.00 | -1.08 | -0.12           |
| <b>2-P</b>                          |                      |       |       |       |       |                 |
| <sup>2-6</sup> P <sub>(hs)</sub>    | 4.07                 | 0.03  | 0.42  | 0.00  | 0.03  | 0.48            |
| <sup>2-4</sup> P <sub>(is)</sub>    | 2.61                 | 0.03  | 0.40  | 0.00  | 0.03  | -0.05           |
| <sup>2-2</sup> P <sub>(ls)</sub>    | 0.91                 | 0.00  | 0.14  | 0.00  | 0.00  | -0.05           |

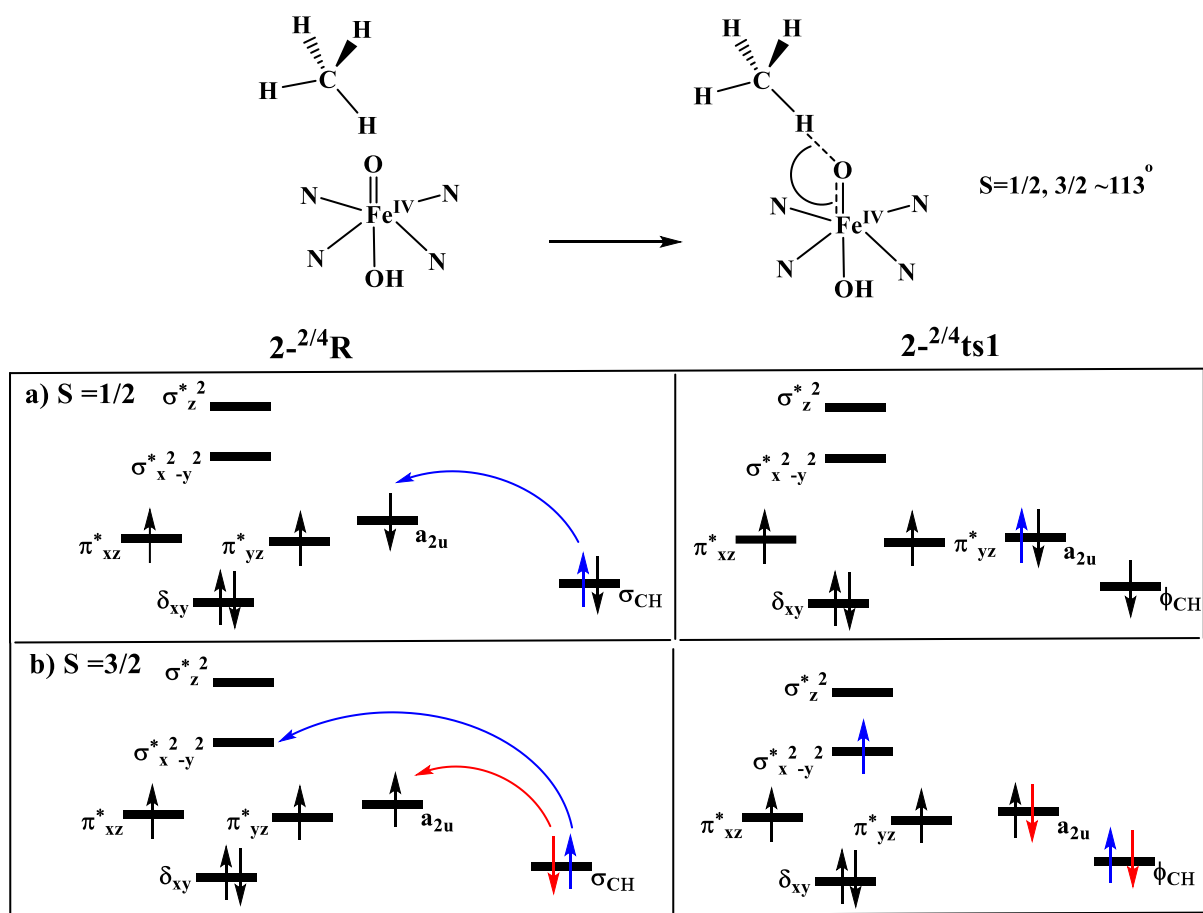

**Figure S12.** Orbitals and their occupancy changes during the hydrogen atom abstraction from methane.

**Table S11.** B3LYP-D2 computed optimized energy with zero-point energy corrections (ZPE) of possible spin states of complex **3**.

| Spin states                                | Energy(kJ/mol) |
|--------------------------------------------|----------------|
| <b>3</b>                                   |                |
| $^{10}\mathbf{3}_{(hs, hs)}$               | 109.3          |
| $^8\mathbf{3}_{(hs, hs)}$                  | 112.4          |
| $^2\mathbf{3}_{(hs, hs)}$                  | 114.5          |
| $^6\mathbf{3}_{(is, is)}$                  | 6.7            |
| $^4\mathbf{3}_{(is, is)}$                  | 6.1            |
| $^2\mathbf{3}_{(is, is)}$                  | 0.0            |
| <b>3-ts1</b>                               |                |
| $\mathbf{3}^{-10}\mathbf{ts1}_{(hs, hs)}$  | 119.3          |
| $\mathbf{3}^{-8}\mathbf{ts1}_{(hs, hs)}$   | 113.7          |
| $\mathbf{3}^{-2}\mathbf{ts1}_{(hs, hs)}$   | 125.8          |
| $\mathbf{3}^{-6}\mathbf{ts1}_{(is, is)}$   | 3.8            |
| $\mathbf{3}^{-4}\mathbf{ts1}_{(is, is)}$   | 2.8            |
| $\mathbf{3}^{-2}\mathbf{ts1}_{(is, is)}$   | 0.0            |
| <b>3-int1</b>                              |                |
| $\mathbf{3}^{-12}\mathbf{int1}_{(hs, hs)}$ | 59.4           |
| $\mathbf{3}^{-10}\mathbf{int1}_{(hs, hs)}$ | 48.8           |
| $\mathbf{3}^{-4}\mathbf{int1}_{(hs, hs)}$  | 79.0           |
| $\mathbf{3}^{-2}\mathbf{int1}_{(hs, hs)}$  | 65.7           |
| $\mathbf{3}^{-8}\mathbf{int1}_{(is, is)}$  | 17.9           |
| $\mathbf{3}^{-6}\mathbf{int1}_{(is, is)}$  | 25.3           |
| $\mathbf{3}^{-4}\mathbf{int1}_{(is, is)}$  | 13.6           |
| $\mathbf{3}^{-2}\mathbf{int1}_{(is, is)}$  | 0.0            |
| <b>3-ts2</b>                               |                |
| $\mathbf{3}^{-12}\mathbf{ts1}_{(hs, hs)}$  | 29.2           |
| $\mathbf{3}^{-10}\mathbf{ts1}_{(hs, hs)}$  | 35.9           |
| $\mathbf{3}^{-4}\mathbf{ts1}_{(hs, hs)}$   | 30.5           |
| $\mathbf{3}^{-2}\mathbf{ts1}_{(hs, hs)}$   | 51.5           |
| $\mathbf{3}^{-8}\mathbf{ts1}_{(is, is)}$   | 25.4           |
| $\mathbf{3}^{-6}\mathbf{ts1}_{(is, is)}$   | 0.3            |
| $\mathbf{3}^{-4}\mathbf{ts1}_{(is, is)}$   | 27.1           |
| $\mathbf{3}^{-2}\mathbf{ts1}_{(is, is)}$   | 0.0            |
| <b>3-P</b>                                 |                |
| $\mathbf{3}^{-10}\mathbf{P}_{(hs, hs)}$    | 62.9           |
| $\mathbf{3}^{-2}\mathbf{P}_{(hs, hs)}$     | 30.6           |
| $\mathbf{3}^{-6}\mathbf{P}_{(is, is)}$     | 7.3            |
| $\mathbf{3}^{-2}\mathbf{P}_{(is, is)}$     | 0.0            |

**Table S12a.** B3LYP-D2 computed structural parameters (Å) of the complex **3**.

| Spin states                                     | Fe <sup>IV</sup> (1)-O(1) | Fe <sup>IV</sup> (1)-N <sub>(porp)</sub> | Fe <sup>IV</sup> (2)-O(2) | Fe <sup>IV</sup> (1)-O(1) | Fe <sup>IV</sup> (2)-O(3) | O(1)-H | H-C   | O(1)-C | ∠Fe <sup>III</sup> (1)-O(1)-C | ∠Fe <sup>III</sup> (1)-O(1)-H | ∠O(1)-H-C | ∠Fe <sup>IV</sup> (1)-O(2)-Fe <sup>IV</sup> (2) |
|-------------------------------------------------|---------------------------|------------------------------------------|---------------------------|---------------------------|---------------------------|--------|-------|--------|-------------------------------|-------------------------------|-----------|-------------------------------------------------|
| <b>3</b>                                        |                           |                                          |                           |                           |                           |        |       |        |                               |                               |           |                                                 |
| <sup>10</sup> <b>3</b> <sub>(hs, hs)</sub>      | 1.650                     | 2.079                                    | 1.992                     | 1.667                     | 1.926                     | -      | -     | -      | -                             | -                             | -         | 178.3                                           |
| <sup>8</sup> <b>3</b> <sub>(hs, hs)</sub>       | 1.650                     | 2.079                                    | 1.989                     | 1.666                     | 1.924                     | -      | -     | -      | -                             | -                             | -         | 177.4                                           |
| <sup>2</sup> <b>3</b> <sub>(hs, hs)</sub>       | 1.645                     | 2.080                                    | 1.968                     | 1.662                     | 1.928                     | -      | -     | -      | -                             | -                             | -         | 179.8                                           |
| <sup>6</sup> <b>3</b> <sub>(is, is)</sub>       | 1.658                     | 2.019                                    | 1.952                     | 1.666                     | 1.929                     | -      | -     | -      | -                             | -                             | -         | 178.8                                           |
| <sup>4</sup> <b>3</b> <sub>(is, is)</sub>       | 1.657                     | 2.019                                    | 1.952                     | 1.664                     | 1.930                     | -      | -     | -      | -                             | -                             | -         | 178.8                                           |
| <sup>2</sup> <b>3</b> <sub>(is, is)</sub>       | 1.656                     | 2.019                                    | 1.917                     | 1.662                     | 1.927                     | -      | -     | -      | -                             | -                             | -         | 179.2                                           |
| <b>3-ts1</b>                                    |                           |                                          |                           |                           |                           |        |       |        |                               |                               |           |                                                 |
| <sup>3-10</sup> <b>ts1</b> <sub>(hs, hs)</sub>  | 1.791                     | 2.076                                    | 1.902                     | 1.682                     | 1.912                     | 1.107  | 1.461 | 2.568  | 116.2                         | 114.9                         | 177.5     | 176.1                                           |
| <sup>3-8</sup> <b>ts1</b> <sub>(hs, hs)</sub>   | 1.792                     | 2.076                                    | 1.894                     | 1.686                     | 1.908                     | 1.108  | 1.458 | 2.566  | 116.0                         | 114.7                         | 177.4     | 176.0                                           |
| <sup>3-2</sup> <b>ts1</b> <sub>(hs, hs)</sub>   | 1.785                     | 2.078                                    | 1.925                     | 1.664                     | 1.916                     | 1.102  | 1.473 | 2.574  | 116.5                         | 115.3                         | 176.5     | 178.1                                           |
| <sup>3-6</sup> <b>ts1</b> <sub>(is, is)</sub>   | 1.787                     | 2.018                                    | 1.883                     | 1.682                     | 1.914                     | 1.104  | 1.468 | 2.573  | 114.6                         | 114.7                         | 178.5     | 176.7                                           |
| <sup>3-4</sup> <b>ts1</b> <sub>(is, is)</sub>   | 1.791                     | 2.017                                    | 1.860                     | 1.699                     | 1.914                     | 1.106  | 1.456 | 2.563  | 113.3                         | 114.0                         | 178.6     | 176.8                                           |
| <sup>3-2</sup> <b>ts1</b> <sub>(is, is)</sub>   | 1.790                     | 2.018                                    | 1.874                     | 1.670                     | 1.922                     | 1.100  | 1.472 | 2.572  | 114.3                         | 114.2                         | 179.5     | 178.7                                           |
| <b>3-int1</b>                                   |                           |                                          |                           |                           |                           |        |       |        |                               |                               |           |                                                 |
| <sup>3-12</sup> <b>int1</b> <sub>(hs, hs)</sub> | 1.843                     | 2.087                                    | 2.083                     | 1.665                     | 1.944                     | 0.979  | 2.265 | 3.175  | 111.4                         | 128.9                         | 153.9     | 177.1                                           |
| <sup>3-10</sup> <b>int1</b> <sub>(hs, hs)</sub> | 1.835                     | 2.087                                    | 2.083                     | 1.665                     | 1.945                     | 0.984  | 2.110 | 3.044  | 114.1                         | 129.0                         | 157.5     | 177.6                                           |
| <sup>3-4</sup> <b>int1</b> <sub>(hs, hs)</sub>  | 1.847                     | 2.089                                    | 2.144                     | 1.654                     | 1.940                     | 0.980  | 2.243 | 3.165  | 110.7                         | 127.3                         | 156.1     | 179.3                                           |
| <sup>3-2</sup> <b>int1</b> <sub>(hs, hs)</sub>  | 1.838                     | 2.087                                    | 2.119                     | 1.655                     | 1.936                     | 0.984  | 2.113 | 3.048  | 113.7                         | 128.4                         | 157.8     | 177.4                                           |
| <sup>3-8</sup> <b>int1</b> <sub>(is, is)</sub>  | 1.883                     | 2.027                                    | 2.092                     | 1.659                     | 1.958                     | 0.981  | 2.280 | 3.228  | 110.9                         | 122.5                         | 162.0     | 178.9                                           |
| <sup>3-6</sup> <b>int1</b> <sub>(is, is)</sub>  | 1.872                     | 2.029                                    | 2.091                     | 1.659                     | 1.954                     | 0.985  | 2.139 | 3.095  | 113.4                         | 123.1                         | 163.1     | 179.9                                           |
| <sup>3-4</sup> <b>int1</b> <sub>(is, is)</sub>  | 1.813                     | 2.017                                    | 1.823                     | 1.723                     | 1.906                     | 0.990  | 2.064 | 3.054  | 112.4                         | 111.2                         | 177.7     | 179.8                                           |
| <sup>3-2</sup> <b>int1</b> <sub>(is, is)</sub>  | 1.826                     | 2.018                                    | 1.713                     | 1.801                     | 1.899                     | 0.9891 | 2.081 | 3.070  | 112.8                         | 112.5                         | 179.5     | 179.9                                           |



**Table S12b.** B3LYP-D2 computed structural parameters (Å) of the complex **3**.

| Spin states                                   | Fe <sup>IV</sup> (1)-O(1) | Fe <sup>IV</sup> (1)-N <sub>(porp)</sub> | Fe <sup>IV</sup> (2)-O(2) | Fe <sup>IV</sup> (1)-O(1) | Fe <sup>IV</sup> (2)-O(3) | O(1)-H | H-C   | O(1)-C | ∠Fe <sup>III</sup> (1)-O(1)-C | ∠Fe <sup>III</sup> (1)-O(1)-H | ∠O(1)-H-C | ∠Fe <sup>IV</sup> (1)-O(2)-Fe <sup>IV</sup> (2) |
|-----------------------------------------------|---------------------------|------------------------------------------|---------------------------|---------------------------|---------------------------|--------|-------|--------|-------------------------------|-------------------------------|-----------|-------------------------------------------------|
| <b>3-ts2</b>                                  |                           |                                          |                           |                           |                           |        |       |        |                               |                               |           |                                                 |
| <b>3-<sup>12</sup>ts2</b> <sub>(hs, hs)</sub> | 1.879                     | 2.082                                    | 1.715                     | 1.946                     | 1.957                     | 0.981  | 2.798 | 2.577  | 127.6                         | 112.1                         | 92.5      | 178.5                                           |
| <b>3-<sup>10</sup>ts2</b> <sub>(hs, hs)</sub> | 1.868                     | 2.085                                    | 2.059                     | 1.667                     | 1.945                     | 0.975  | 2.611 | 2.614  | 114.4                         | 126.3                         | 79.0      | 178.2                                           |
| <b>3-<sup>4</sup>ts2</b> <sub>(hs, hs)</sub>  | 1.885                     | 2.055                                    | 1.938                     | 1.693                     | 2.021                     | 0.981  | 2.646 | 2.643  | 131.2                         | 110.5                         | 79.4      | 176.8                                           |
| <b>3-<sup>2</sup>ts2</b> <sub>(hs, hs)</sub>  | 1.871                     | 2.085                                    | 2.092                     | 1.657                     | 1.935                     | 0.975  | 2.593 | 2.604  | 126.3                         | 113.4                         | 78.5      | 174.0                                           |
| <b>3-<sup>8</sup>ts2</b> <sub>(is, is)</sub>  | 1.887                     | 2.040                                    | 2.023                     | 1.663                     | 1.943                     | 0.979  | 2.801 | 2.427  | 118.8                         | 117.0                         | 102.0     | 177.7                                           |
| <b>3-<sup>6</sup>ts2</b> <sub>(is, is)</sub>  | 1.905                     | 2.025                                    | 2.074                     | 1.661                     | 1.951                     | 0.977  | 2.637 | 2.779  | 112.4                         | 121.3                         | 71.5      | 177.5                                           |
| <b>3-<sup>4</sup>ts2</b> <sub>(is, is)</sub>  | 1.855                     | 2.047                                    | 1.876                     | 1.665                     | 1.918                     | 0.980  | 2.804 | 2.479  | 131.8                         | 113.8                         | 98.9      | 178.6                                           |
| <b>3-<sup>2</sup>ts2</b> <sub>(is, is)</sub>  | 1.911                     | 2.026                                    | 2.021                     | 1.656                     | 1.947                     | 0.978  | 2.660 | 2.797  | 113.4                         | 119.6                         | 87.6      | 176.5                                           |
| <b>3-P</b>                                    |                           |                                          |                           |                           |                           |        |       |        |                               |                               |           |                                                 |
| <b>3-<sup>10</sup>P</b> <sub>(hs, hs)</sub>   | 2.178                     | 2.076                                    | 1.663                     | 2.062                     | 1.910                     | 0.978  | 2.053 | 1.466  | 121.1                         | 102.6                         | 112.7     | 179.2                                           |
| <b>3-<sup>2</sup>P</b> <sub>(hs, hs)</sub>    | 2.320                     | 2.092                                    | 1.768                     | 1.812                     | 2.051                     | 0.978  | 2.044 | 1.462  | 118.9                         | 99.3                          | 112.2     | 175.9                                           |
| <b>3-<sup>6</sup>P</b> <sub>(is, is)</sub>    | 2.263                     | 2.019                                    | 1.898                     | 1.697                     | 1.906                     | 0.977  | 2.046 | 1.465  | 118.4                         | 103.3                         | 112.2     | 179.5                                           |
| <b>3-<sup>2</sup>P</b> <sub>(is, is)</sub>    | 2.281                     | 2.020                                    | 1.846                     | 1.675                     | 1.901                     | 0.977  | 2.045 | 1.465  | 118.6                         | 102.3                         | 112.1     | 179.4                                           |

**Table S13.** B3LYP-D2 computed spin densities of the complex **3**.

| Spin states                                             | Fe <sup>IV</sup> (1) | Fe <sup>IV</sup> (2) | O(1)  | O(2)  | O(3)  | C     | H     | a <sub>2u</sub> |
|---------------------------------------------------------|----------------------|----------------------|-------|-------|-------|-------|-------|-----------------|
| <b>3</b>                                                |                      |                      |       |       |       |       |       |                 |
| <sup>10</sup> <b>3</b> <sub>(hs, hs)</sub>              | 3.08                 | 3.06                 | 0.68  | 0.60  | 0.04  | --    | --    | 0.68            |
| <sup>8</sup> <b>3</b> <sub>(hs, hs)</sub>               | 3.08                 | 3.06                 | 0.62  | 0.69  | -0.01 | --    | --    | -0.42           |
| <sup>2</sup> <b>3</b> <sub>(hs, hs)</sub>               | 3.02                 | -3.08                | 0.70  | -0.65 | -0.02 | --    | --    | 0.74            |
| <sup>6</sup> <b>3</b> <sub>(is, is)</sub>               | 1.02                 | 1.21                 | 0.99  | 0.83  | 0.07  | --    | --    | 0.45            |
| <sup>4</sup> <b>3</b> <sub>(is, is)</sub>               | 1.05                 | 1.24                 | 0.99  | 0.81  | 0.03  | --    | --    | -0.49           |
| <sup>2</sup> <b>3</b> <sub>(is, is)</sub>               | 1.03                 | -1.25                | 1.00  | -0.76 | -0.04 | --    | --    | 0.42            |
| <b>3-ts1</b>                                            |                      |                      |       |       |       |       |       |                 |
| <b>3</b> <sup>-10</sup> <b>ts1</b> <sub>(hs, hs)</sub>  | 2.83                 | 3.00                 | 0.38  | 0.71  | 0.04  | 0.74  | -0.05 | 0.63            |
| <b>3</b> <sup>-8</sup> <b>ts1</b> <sub>(hs, hs)</sub>   | 2.85                 | 3.00                 | 0.38  | 0.71  | -0.00 | 0.73  | -0.06 | -0.52           |
| <b>3</b> <sup>-2</sup> <b>ts1</b> <sub>(hs, hs)</sub>   | 2.78                 | -3.08                | 0.42  | -0.66 | -0.01 | 0.76  | -0.06 | 0.73            |
| <b>3</b> <sup>-6</sup> <b>ts1</b> <sub>(is, is)</sub>   | 0.90                 | 1.16                 | 0.55  | 0.84  | 0.06  | 0.76  | -0.06 | 0.47            |
| <b>3</b> <sup>-4</sup> <b>ts1</b> <sub>(is, is)</sub>   | 0.96                 | 1.14                 | 0.53  | 0.84  | 0.04  | 0.74  | -0.06 | -0.42           |
| <b>3</b> <sup>-2</sup> <b>ts1</b> <sub>(is, is)</sub>   | 0.84                 | -1.21                | 0.55  | -0.76 | -0.04 | 0.77  | -0.07 | 0.44            |
| <b>3-int1</b>                                           |                      |                      |       |       |       |       |       |                 |
| <b>3</b> <sup>-12</sup> <b>int1</b> <sub>(hs, hs)</sub> | 4.04                 | 3.13                 | 0.46  | 0.63  | 0.06  | 1.12  | 0.02  | 0.82            |
| <b>3</b> <sup>-10</sup> <b>int1</b> <sub>(hs, hs)</sub> | 4.02                 | 3.13                 | 0.39  | 0.63  | 0.07  | -1.09 | -0.00 | 0.81            |
| <b>3</b> <sup>-4</sup> <b>int1</b> <sub>(hs, hs)</sub>  | 4.09                 | -3.06                | 0.47  | -0.66 | -0.00 | 1.12  | 0.02  | 0.77            |
| <b>3</b> <sup>-2</sup> <b>int1</b> <sub>(hs, hs)</sub>  | 4.08                 | -3.02                | 0.39  | -0.67 | 0.02  | -1.09 | -0.00 | 0.82            |
| <b>3</b> <sup>-8</sup> <b>int1</b> <sub>(is, is)</sub>  | 2.57                 | 1.29                 | 0.43  | 0.82  | 0.08  | 1.13  | 0.01  | 0.35            |
| <b>3</b> <sup>-6</sup> <b>int1</b> <sub>(is, is)</sub>  | 2.55                 | 1.29                 | 0.36  | 0.81  | 0.08  | -1.11 | 0.01  | 0.35            |
| <b>3</b> <sup>-4</sup> <b>int1</b> <sub>(is, is)</sub>  | 1.00                 | 1.08                 | 0.21  | 0.85  | 0.06  | 1.09  | -0.01 | -0.55           |
| <b>3</b> <sup>-2</sup> <b>int1</b> <sub>(is, is)</sub>  | 1.12                 | -0.95                | 0.11  | 0.62  | -0.07 | -1.09 | 0.00  | 0.29            |
| <b>3-ts2</b>                                            |                      |                      |       |       |       |       |       |                 |
| <b>3</b> <sup>-12</sup> <b>ts2</b> <sub>(hs, hs)</sub>  | 3.32                 | 4.09                 | 0.20  | 0.71  | 0.02  | 1.04  | 0.01  | 0.75            |
| <b>3</b> <sup>-10</sup> <b>ts2</b> <sub>(hs, hs)</sub>  | 3.99                 | 3.16                 | 0.39  | 0.61  | 0.06  | -1.04 | 0.00  | 0.79            |
| <b>3</b> <sup>-4</sup> <b>ts2</b> <sub>(hs, hs)</sub>   | 3.23                 | -2.72                | -0.09 | 0.52  | -0.14 | 1.06  | 0.01  | 0.81            |
| <b>3</b> <sup>-2</sup> <b>ts2</b> <sub>(hs, hs)</sub>   | 4.06                 | -3.03                | 0.39  | -0.65 | 0.02  | -1.02 | 0.00  | 0.82            |
| <b>3</b> <sup>-8</sup> <b>ts2</b> <sub>(is, is)</sub>   | 3.13                 | 1.33                 | 0.07  | 0.77  | -0.01 | 0.83  | 0.02  | 0.54            |
| <b>3</b> <sup>-6</sup> <b>ts2</b> <sub>(is, is)</sub>   | 2.57                 | 1.30                 | 0.36  | 0.80  | 0.08  | -1.04 | 0.00  | 0.31            |
| <b>3</b> <sup>-4</sup> <b>ts2</b> <sub>(is, is)</sub>   | 2.91                 | -1.31                | 0.02  | -0.62 | -0.05 | 1.01  | 0.02  | 0.72            |
| <b>3</b> <sup>-2</sup> <b>ts2</b> <sub>(is, is)</sub>   | 2.59                 | -1.23                | 0.36  | -0.71 | -0.02 | -1.04 | 0.00  | 0.29            |
| <b>3-P</b>                                              |                      |                      |       |       |       |       |       |                 |
| <b>3</b> <sup>-10</sup> <b>P</b> <sub>(hs, hs)</sub>    | 3.37                 | 4.08                 | 0.00  | 0.62  | 0.25  | 0.00  | 0.00  | 0.22            |
| <b>3</b> <sup>-2</sup> <b>P</b> <sub>(hs, hs)</sub>     | 4.00                 | -4.06                | 0.03  | 0.12  | -0.09 | 0.00  | 0.00  | 0.49            |
| <b>3</b> <sup>-6</sup> <b>P</b> <sub>(is, is)</sub>     | 2.72                 | 1.62                 | 0.04  | 0.66  | 0.11  | 0.00  | 0.00  | -0.05           |
| <b>3</b> <sup>-2</sup> <b>P</b> <sub>(is, is)</sub>     | 2.69                 | -1.45                | 0.04  | -0.27 | -0.06 | 0.00  | 0.00  | -0.08           |

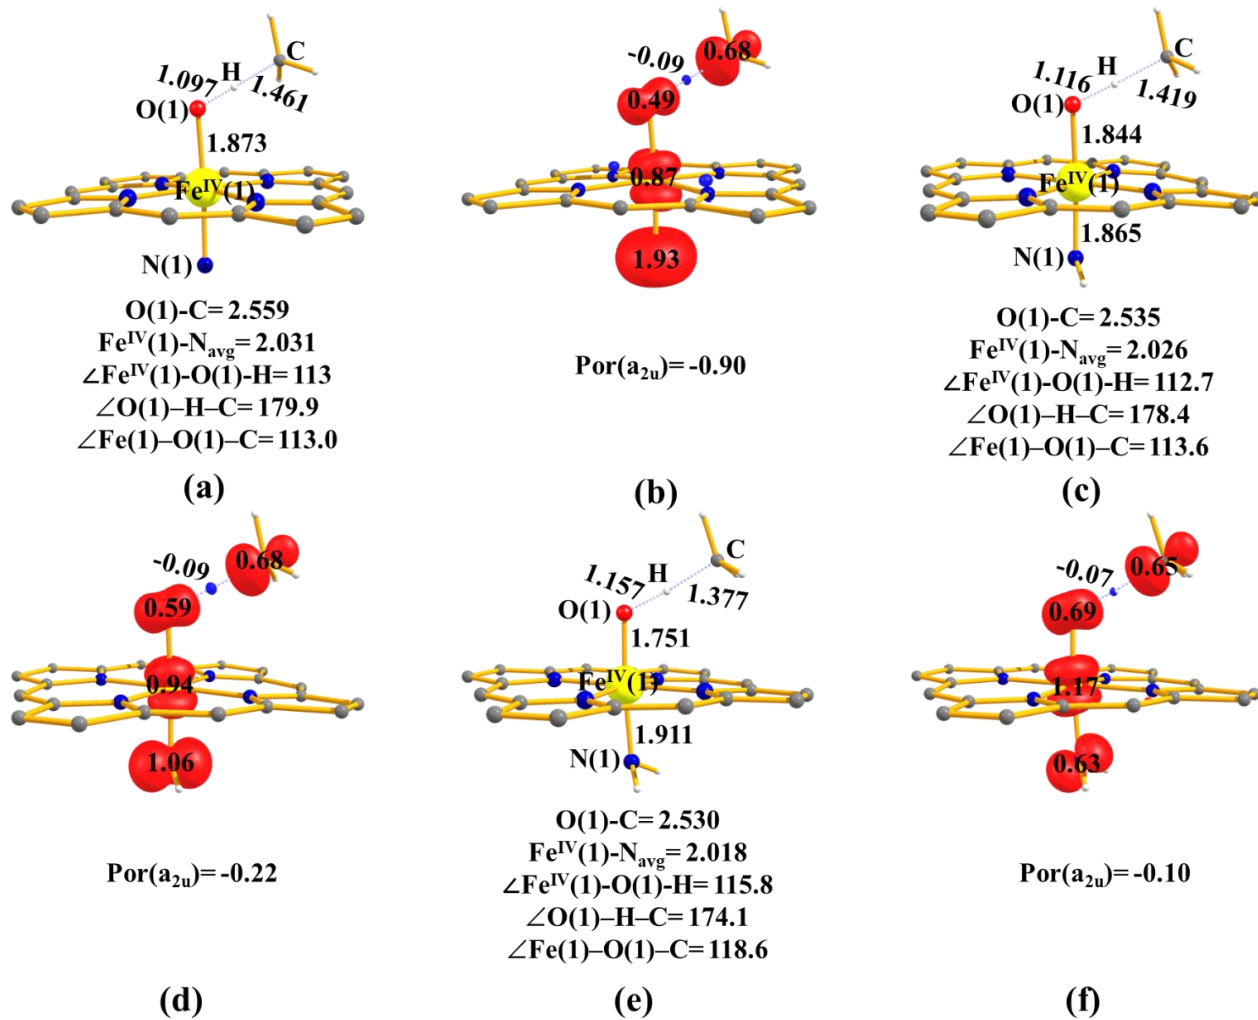

**Figure S13.** The optimized structures and its corresponding spin density plots for a-b)  $4\mathbf{a}\text{-}^4\mathbf{ts1}_{(\text{is})}$ , c-d)  $4\mathbf{b}\text{-}^4\mathbf{ts1}_{(\text{is})}$  e-f), and  $4\mathbf{c}\text{-}^4\mathbf{ts1}_{(\text{is})}$ . All the distances are given in Å and angles in °. All hydrogen atoms (except  $\text{CH}_4$ ) are omitted for clarity.

**Table S14.** B3LYP-D2 computed optimized energy with Gibb's free energy corrections (GFE) of possible spin states of complexes **4a/4b/4c**.

| Spin states                               | Energy(kJ/mol) |
|-------------------------------------------|----------------|
| <b>4a</b>                                 |                |
| <b>4a-<sup>6</sup>R</b> <sub>(hs)</sub>   | 0.0            |
| <b>4a-<sup>4</sup>R</b> <sub>(hs)</sub>   | 26.9           |
| <b>4a-<sup>4</sup>R</b> <sub>(is)</sub>   | 12.2           |
| <b>4a-<sup>2</sup>R</b> <sub>(is)</sub>   | 4.9            |
| <b>4a-<sup>2</sup>R</b> <sub>(ls)</sub>   | 52.6           |
| <b>4a-ts1</b>                             |                |
| <b>4a-<sup>6</sup>ts1</b> <sub>(hs)</sub> | 90.2           |
| <b>4a-<sup>4</sup>ts1</b> <sub>(hs)</sub> | 96.1           |
| <b>4a-<sup>4</sup>ts1</b> <sub>(is)</sub> | 58.4           |
| <b>4a-<sup>2</sup>ts1</b> <sub>(is)</sub> | 65.9           |
| <b>4a-<sup>2</sup>ts1</b> <sub>(ls)</sub> | 79.3           |
| <b>4b</b>                                 |                |
| <b>4b-<sup>6</sup>R</b> <sub>(hs)</sub>   | 122.3          |
| <b>4b-<sup>4</sup>R</b> <sub>(hs)</sub>   | 38.3           |
| <b>4b-<sup>4</sup>R</b> <sub>(is)</sub>   | 0.0            |
| <b>4b-<sup>2</sup>R</b> <sub>(is)</sub>   | 99.3           |
| <b>4b-<sup>2</sup>R</b> <sub>(ls)</sub>   | 44.1           |
| <b>4b-ts1</b>                             |                |
| <b>4b-<sup>6</sup>ts1</b> <sub>(hs)</sub> | 126.9          |
| <b>4b-<sup>4</sup>ts1</b> <sub>(hs)</sub> | 144.7          |
| <b>4b-<sup>4</sup>ts1</b> <sub>(is)</sub> | 88.3           |
| <b>4b-<sup>2</sup>ts1</b> <sub>(is)</sub> | 94.9           |
| <b>4b-<sup>2</sup>ts1</b> <sub>(ls)</sub> | 95.6           |
| <b>4c</b>                                 |                |
| <b>4c-<sup>6</sup>R</b> <sub>(hs)</sub>   | 48.1           |
| <b>4c-<sup>4</sup>R</b> <sub>(hs)</sub>   | 46.1           |
| <b>4c-<sup>4</sup>R</b> <sub>(is)</sub>   | 1.9            |
| <b>4c-<sup>2</sup>R</b> <sub>(is)</sub>   | 0.0            |
| <b>4c-<sup>2</sup>R</b> <sub>(ls)</sub>   | 35.9           |
| <b>4c-ts1</b>                             |                |
| <b>4c-<sup>6</sup>ts1</b> <sub>(hs)</sub> | 198.4          |
| <b>4c-<sup>4</sup>ts1</b> <sub>(hs)</sub> | 163.8          |
| <b>4c-<sup>4</sup>ts1</b> <sub>(is)</sub> | 90.6           |
| <b>4c-<sup>2</sup>ts1</b> <sub>(is)</sub> | 104.9          |
| <b>4c-<sup>2</sup>ts1</b> <sub>(ls)</sub> | 139.8          |

**Table S15.** Computed relative deformation energies in each fragment with respect to the catalyst and interaction energy in the reorganization HATs (**ts1s**) are values for the **1-<sup>3</sup>ts1<sub>(is)</sub>**, **2-<sup>2</sup>ts1<sub>(is)</sub>**, **3-<sup>2</sup>ts1<sub>(is, is)</sub>**, **4-<sup>2</sup>ts1<sub>(is, is)</sub>**, **4a-<sup>4</sup>ts1<sub>(is)</sub>**, **4b-<sup>4</sup>ts1<sub>(is)</sub>**, and **4c-<sup>4</sup>ts1<sub>(is)</sub>**. Note:- All energies (in kJ/mol) have been calculated using hydrogen atom abstraction transition state and reactant from the ground spin state energetics.

| <b>ts1s</b>                                 | $\Delta E_{\text{def}}$ | $\Delta E_{\text{int}}$ | $\Delta E_{\text{act}}$ | $\Delta E^\ddagger$ |
|---------------------------------------------|-------------------------|-------------------------|-------------------------|---------------------|
| <b>1-<sup>3</sup>ts1<sub>(is)</sub></b>     | 147.6                   | -40.7                   | 106.9                   | 108.4               |
| <b>2-<sup>2</sup>ts1<sub>(is)</sub></b>     | 81.2                    | -16.7                   | 64.5                    | 67.8                |
| <b>3-<sup>2</sup>ts1<sub>(is, is)</sub></b> | 124.1                   | -12.7                   | 111.4                   | 113.4               |
| <b>4-<sup>2</sup>ts1<sub>(is, is)</sub></b> | 67.1                    | -23.7                   | 43.4                    | 26.6                |
| <b>4a-<sup>4</sup>ts1<sub>(is)</sub></b>    | 77.5                    | -7.6                    | 69.9                    | 58.4                |
| <b>4b-<sup>4</sup>ts1<sub>(is)</sub></b>    | 147.1                   | -51.8                   | 95.3                    | 88.3                |
| <b>4c-<sup>4</sup>ts1<sub>(is)</sub></b>    | 112.1                   | -20.9                   | 91.2                    | 90.6                |

Where,  $\Delta E_{\text{def}}$ ,  $\Delta E_{\text{int}}$ ,  $\Delta E_{\text{act}}$ , and  $\Delta E^\ddagger$  are a deformation, interaction, activation strain energy, and barrier height of the hydrogen atom abstraction, respectively.

$$\Delta E_{\text{act}} = \Delta E_{\text{def}} + \Delta E_{\text{int}}$$

$$\Delta E_{\text{dis}} = [\{E_{f1(\text{TS})} + E_{f2(\text{TS})}\} - \{E_{f1} + E_{f2}\}]$$

$$\Delta E_{\text{int}} = [E_{(\text{TS})} - \{E_{f1} + E_{f2}\}]$$

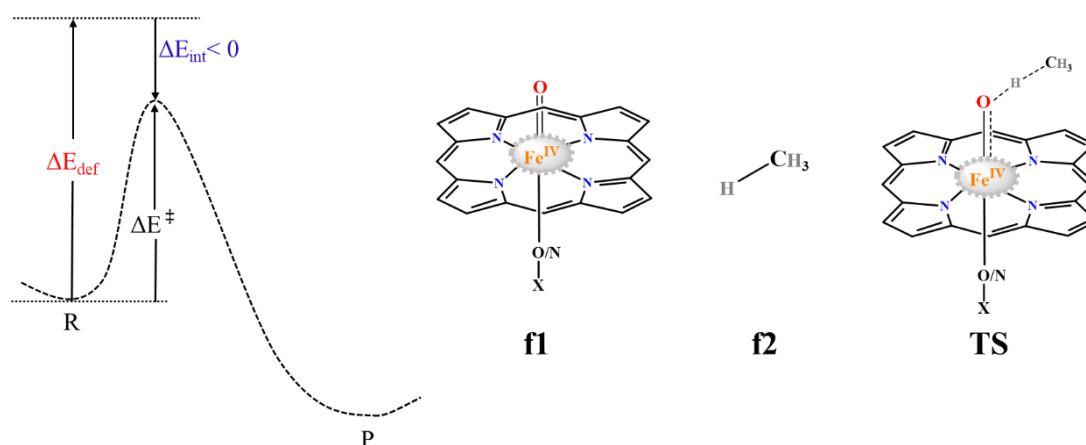

**Figure S14.** Illustration of interaction and distortion energies in the activation strain analysis for hydrogen atom abstraction transition state. Relationship between the barrier  $\Delta E^\ddagger$ , the deformation energy of reactants,  $\Delta E_{\text{def}}$ , and their interaction energy,  $\Delta E_{\text{int}}$ , at the TS:  $\Delta E_{\text{int}} < 0$ .

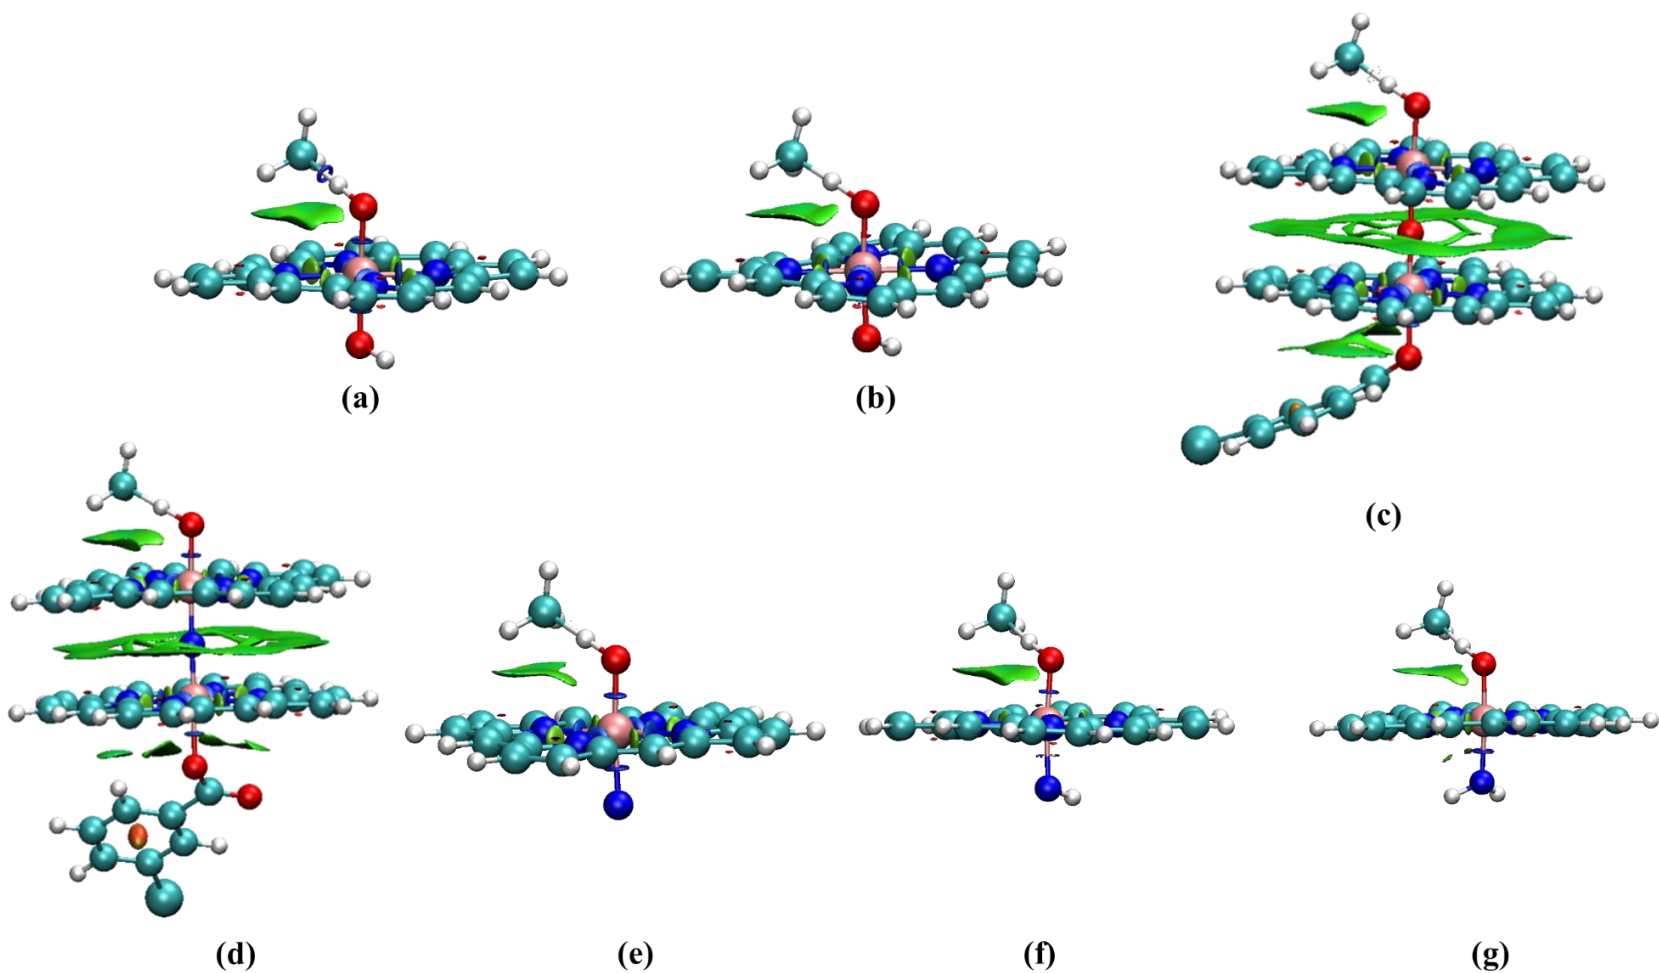

**Figure S15.** Non-covalent interaction (NCI) plots showing the comparison among C–H bond activation transition states (HAT) of a)  ${}^3\mathbf{1}_{(is)}$ , b)  ${}^2\mathbf{2}_{(is)}$ , c)  ${}^2\mathbf{3}_{(is, is)}$ , d)  ${}^2\mathbf{4}_{(is, is)}$ , e)  ${}^4\mathbf{4a}_{(is)}$ , f)  ${}^4\mathbf{4b}_{(is)}$ , and g)  ${}^4\mathbf{4c}_{(is)}$ . Only the non-covalent stabilization interaction between the methyl group and the  $\pi$ -cloud of the porphyrin ring are shown, with the strongest stabilizing interaction between the methyl group and the porphyrin in the NCI plots of the HAT transition states, as indicated by the green colour between hydrogen atom of the methyl and the porphyrin groups.

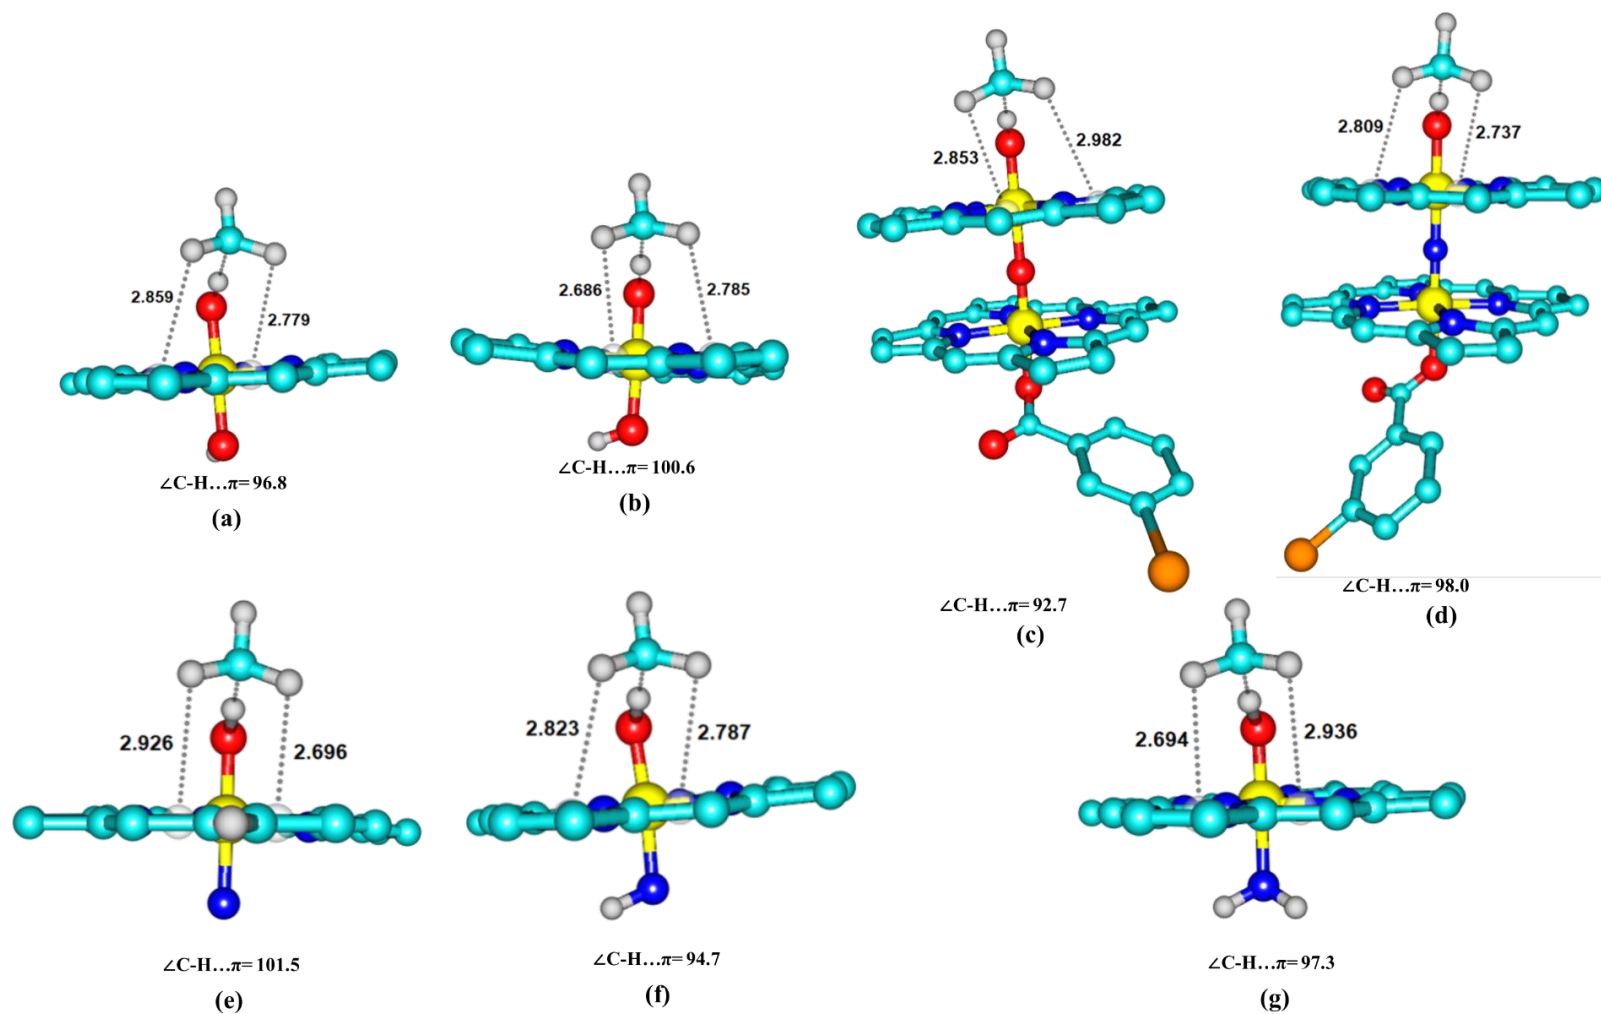

**Figure S16.** Optimized structures of hydrogen abstraction transition states; a)  ${}^3\mathbf{1}_{(is)}$ , b)  ${}^2\mathbf{2}_{(is)}$ , c)  ${}^2\mathbf{3}_{(is, is)}$ , d)  ${}^2\mathbf{4}_{(is, is)}$ , e)  ${}^4\mathbf{4a}_{(is)}$ , f)  ${}^4\mathbf{4b}_{(is)}$ , g)  ${}^4\mathbf{4c}_{(is)}$ , showing the shortest distance between the H atoms of the methyl group and the  $\pi$ -cloud of the porphyrin ring (CH... $\pi$  interactions). (Colour code: Yellow= Fe, Orange= Cl, Red= O, Blue= N, and Cyan= C, Silver= H). All the distances are given in Å angles in  $^\circ$ .

## The source of stabilizing energy between methane and porphyrin ring

The amount of stabilization by methane is analogous in the porphyrin ring and solvent phase with Gibb's free energy corrections. Here, we have used solvent-phase values for calculating the bond distances, Mulliken charge densities, and electrostatic interaction. These Mulliken charge densities are entirely dependent on the theory level. Here, the calculation is not a completely accurate approach for the calculation of interactions energy, however, it gives some insight into electrostatic and other types of interactions between methane and catalyst.

### a) UB3LYP Data for species 1

#### Distances (Å)

|            |       |
|------------|-------|
| O(1)-H1    | 1.072 |
| O(1)-H2    | 2.999 |
| O(1)-H3    | 3.012 |
| O(1)-H4    | 3.009 |
| O(1)-C     | 2.601 |
| Fe(1)-O(1) | 1.689 |

#### Mulliken Charge Densities

|      |        |
|------|--------|
| O(1) | -0.545 |
| C    | -0.476 |
| H1   | 0.199  |
| H2   | 0.143  |
| H3   | 0.134  |
| H4   | 0.133  |

### b) Stabilization Energy by methane

Evaluated as  $E_{ts1} - (E_R + E_{CH_4})$  neglecting counterpoise corrections.

For  $\mathbf{1}^{-3}\mathbf{ts1}_{(is)}$ :  $-2444.012075 - (-2403.531227 - 40.46535673) = -0.0154908$  Hartree = - **40.67** kJ/mol



### c) Electrostatic Interaction

Evaluated (general equation) in kcal/mol from  $E_{el} = 332 \cdot \sum_{A,B} q_A \cdot q_B / R_{AB}$

where the distance between two-point charges  $R_{AB}$  is in Å.

In our case, we include the interactions between C1, H1, and one shorted distance H2 atom from the O1 atom and the oxo ligand.

Evaluated in kJ/mol from

$$E_{el} = 1388 \cdot q_O \left( \frac{q_C}{R_{Oc}} + \sum_n \frac{q_H}{R_{OH}} \right)$$

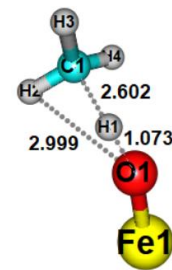

**For 1-<sup>3</sup>ts1<sub>(is)</sub>**:-

$$E_{el} = 1388 \cdot (-0.545) \left[ \left( \frac{-0.476}{2.601} \right) + \left\{ \left( \frac{0.199}{1.072} \right) + \left( \frac{0.143}{2.999} \right) \right\} \right] = 1388 \cdot (-0.16806) \cdot [0.047682084] = -37.93 \text{ kJ/mol}$$

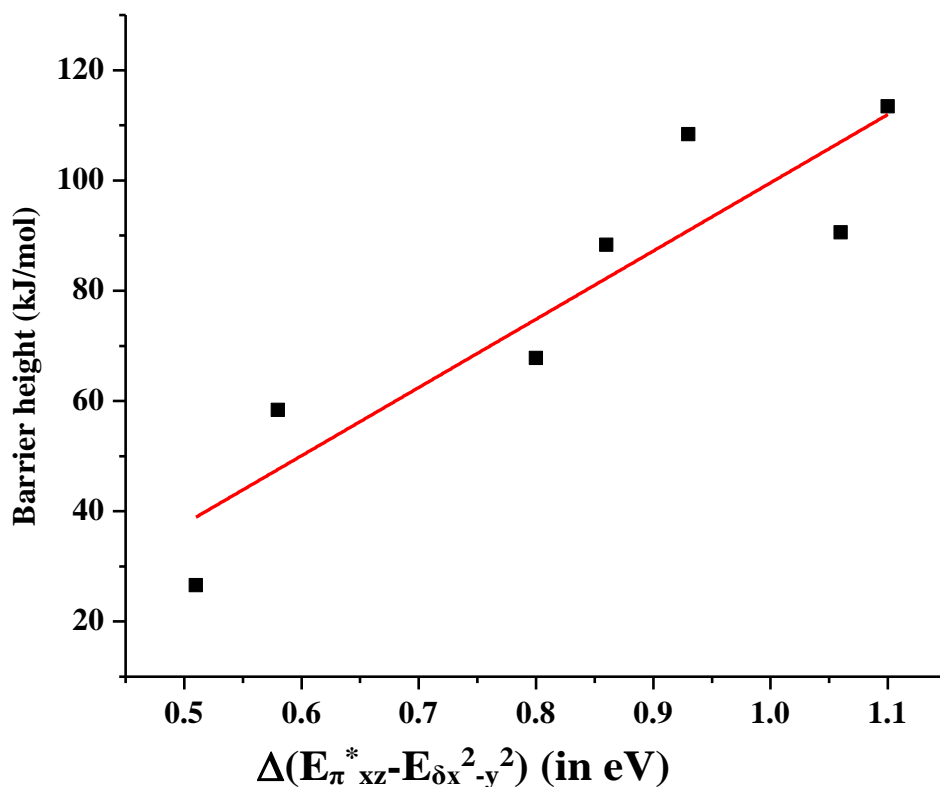

**Figure S17.** Correlation between methane hydroxylation barrier height and  $\Delta E(E_{\pi^*_{xz}} - E_{\delta_{x^2-y^2}})$  gap for the high-spin reactions by all seven species.

**Table S16.** Summary of EDA performed for species **1**, **2**, and **3**. The  $\Delta E$  is given in kJ/mol.

| Species                                                                                                               | EDA [{OH}/[(Por)( <i>m</i> -CBA)Fe <sup>IV</sup> ( $\mu$ -O) + {Fe} + {O}] |                                     |                                  |
|-----------------------------------------------------------------------------------------------------------------------|----------------------------------------------------------------------------|-------------------------------------|----------------------------------|
|                                                                                                                       | $\Delta E_{\text{int}}$ (kJ/mol)                                           | $\Delta E_{\text{steric}}$ (kJ/mol) | $\Delta E_{\text{orb}}$ (kJ/mol) |
| [(HO)Fe <sup>IV</sup> (O)(Por)] <sup>-</sup> ( <b>1</b> )                                                             | -305.2                                                                     | 45.5                                | -350.7                           |
| [(HO)Fe <sup>IV</sup> (O)(Por <sup>•+</sup> )] ( <b>2</b> )                                                           | -658.7                                                                     | 261.6                               | -397.1                           |
| [(Por)( <i>m</i> -CBA)Fe <sup>IV</sup> ( $\mu$ -O)Fe <sup>IV</sup> (O)(Por <sup>•+</sup> )] <sup>-</sup> ( <b>3</b> ) | -338.5                                                                     | 42.1                                | -296.4                           |

## Coordinates

The coordinates are given in xyz-format, and the specific multiplicity/species/spin state pair for each of the calculations is given in parenthesis in the comment line of the structure.

### $[(\text{HO})\text{Fe}^{\text{IV}}(\text{O})(\text{Por})]^-$ (1)

#### $^5\mathbf{1}_{(\text{hs})}$ or $\mathbf{1}^{-5}\mathbf{R}_{(\text{hs})}$

|    |              |              |              |                                                                           |              |              |              |
|----|--------------|--------------|--------------|---------------------------------------------------------------------------|--------------|--------------|--------------|
| Fe | -0.011464000 | 0.003398000  | -0.098650000 | C                                                                         | 3.487044000  | -2.513667000 | 0.000245000  |
| N  | -1.621284000 | -1.317757000 | -0.034122000 | C                                                                         | -2.511559000 | 3.477003000  | 0.000176000  |
| N  | -1.330622000 | 1.607471000  | -0.031649000 | C                                                                         | -2.507902000 | -3.479616000 | 0.000203000  |
| N  | 1.326072000  | -1.602197000 | 0.017996000  | C                                                                         | -3.482203000 | 2.514663000  | -0.015392000 |
| N  | 1.618251000  | 1.312695000  | -0.001101000 | C                                                                         | -3.479555000 | -2.518289000 | -0.015381000 |
| C  | -1.531036000 | -2.686256000 | -0.000192000 | H                                                                         | 2.629337000  | 4.554721000  | 0.035084000  |
| C  | -0.973514000 | 2.931594000  | 0.001995000  | H                                                                         | 2.634121000  | -4.551970000 | 0.035269000  |
| C  | -2.948112000 | -0.968967000 | -0.019655000 | H                                                                         | 4.559290000  | 2.640716000  | 0.008104000  |
| C  | -2.700171000 | 1.525278000  | -0.016505000 | H                                                                         | 4.562067000  | -2.635954000 | 0.007781000  |
| C  | 0.967574000  | -2.930377000 | 0.015102000  | H                                                                         | -2.627457000 | 4.552771000  | 0.006445000  |
| C  | 1.525019000  | 2.683948000  | 0.006957000  | H                                                                         | -2.622681000 | -4.555504000 | 0.006453000  |
| C  | 2.700095000  | -1.524664000 | -0.003034000 | H                                                                         | -4.556994000 | 2.639284000  | -0.024296000 |
| C  | 2.948957000  | 0.968976000  | -0.010321000 | H                                                                         | -4.554214000 | -2.644035000 | -0.024317000 |
| C  | -2.880202000 | -3.243689000 | 0.027030000  | C                                                                         | 0.001565000  | 3.423212000  | 0.010573000  |
| C  | -2.187188000 | 3.742141000  | 0.031092000  | C                                                                         | 0.005162000  | -3.423211000 | 0.010560000  |
| C  | -3.751604000 | -2.187306000 | 0.015435000  | C                                                                         | -3.442104000 | -0.001796000 | -0.027179000 |
| C  | -3.248993000 | 2.877158000  | 0.019959000  | C                                                                         | 3.443443000  | 0.001802000  | -0.026674000 |
| C  | 2.179602000  | -3.740012000 | 0.004255000  | H                                                                         | 0.001505000  | 4.509543000  | 0.022905000  |
| C  | 2.872315000  | 3.243060000  | 0.007217000  | H                                                                         | 0.006232000  | -4.509541000 | 0.022901000  |
| C  | 3.244083000  | -2.876541000 | -0.007293000 | H                                                                         | -4.528272000 | -0.002369000 | -0.037271000 |
| C  | 3.747792000  | 2.189063000  | -0.003987000 | H                                                                         | 4.529683000  | 0.002376000  | -0.021366000 |
| H  | -3.111846000 | -4.300564000 | 0.056703000  | O                                                                         | -0.016849000 | -0.000033000 | -1.767197000 |
| H  | -2.207361000 | 4.823872000  | 0.060888000  | H                                                                         | -0.881133000 | -0.001573000 | 2.160387000  |
| H  | -4.833483000 | -2.214024000 | 0.033121000  | O                                                                         | 0.046968000  | 0.000116000  | 1.842386000  |
| H  | -4.304673000 | 3.115196000  | 0.038736000  |                                                                           |              |              |              |
| H  | 2.198792000  | -4.822197000 | 0.002286000  | $^1\mathbf{1}_{(\text{ls})}$ or $\mathbf{1}^{-1}\mathbf{R}_{(\text{ls})}$ |              |              |              |
| H  | 3.101481000  | 4.300885000  | 0.014018000  | Fe                                                                        | 0.008683000  | 0.000115000  | -0.056581000 |
| H  | 4.299144000  | -3.117864000 | -0.019863000 | N                                                                         | 1.451146000  | 1.419640000  | -0.018309000 |
| H  | 4.829724000  | 2.220019000  | -0.007201000 | N                                                                         | 1.443064000  | -1.427698000 | -0.018412000 |
| C  | -0.341982000 | -3.422894000 | 0.014246000  | N                                                                         | -1.439476000 | 1.426174000  | 0.001485000  |
| C  | 0.336576000  | 3.421815000  | 0.011831000  | N                                                                         | -1.447719000 | -1.417877000 | 0.001302000  |
| C  | 3.444487000  | -0.339629000 | -0.012116000 | C                                                                         | 1.246818000  | 2.780820000  | 0.005756000  |
| C  | -3.442270000 | 0.339435000  | -0.020054000 | C                                                                         | 1.230775000  | -2.787673000 | 0.005968000  |
| H  | -0.446813000 | -4.505153000 | 0.026217000  | C                                                                         | 2.812437000  | 1.223809000  | -0.025741000 |
| H  | 0.444158000  | 4.503768000  | 0.028034000  | C                                                                         | 2.805456000  | -1.239760000 | -0.025685000 |
| H  | 4.526196000  | -0.448015000 | -0.021130000 | C                                                                         | -1.226539000 | 2.789132000  | 0.010459000  |
| H  | -4.524118000 | 0.447020000  | -0.005007000 | C                                                                         | -1.242609000 | -2.782018000 | 0.010122000  |
| O  | 0.016799000  | -0.004835000 | -1.787654000 | C                                                                         | -2.805709000 | 1.240469000  | -0.025518000 |
| H  | 0.844121000  | -0.236214000 | 2.133743000  | C                                                                         | -2.812913000 | -1.224365000 | -0.025701000 |
| O  | -0.045891000 | 0.021165000  | 1.811994000  | C                                                                         | 2.527337000  | 3.470596000  | 0.011886000  |

#### $^3\mathbf{1}_{(\text{is})}$ or $\mathbf{1}^{-3}\mathbf{R}_{(\text{is})}$

|    |              |              |              |   |              |              |              |
|----|--------------|--------------|--------------|---|--------------|--------------|--------------|
| Fe | 0.009950000  | 0.000019000  | -0.067911000 | C | 3.481096000  | -2.527194000 | -0.008651000 |
| N  | 1.440526000  | 1.426831000  | -0.025641000 | C | -2.501489000 | 3.485002000  | -0.001822000 |
| N  | 1.442034000  | -1.425327000 | -0.025680000 | C | -2.521479000 | -3.470623000 | -0.002306000 |
| N  | -1.436711000 | 1.424629000  | -0.002976000 | C | -3.477457000 | 2.527962000  | -0.025100000 |
| N  | -1.435200000 | -1.426119000 | -0.002885000 | C | -3.491962000 | -2.508015000 | -0.025664000 |
| C  | 1.235586000  | 2.788263000  | -0.000181000 | H | 2.643983000  | 4.546169000  | 0.029928000  |
| C  | 1.238522000  | -2.786975000 | -0.000238000 | H | 2.617758000  | -4.561048000 | 0.030467000  |
| C  | 2.803731000  | 1.233306000  | -0.021769000 | H | 4.570614000  | 2.629729000  | -0.010387000 |
| C  | 2.805032000  | -1.230374000 | -0.021808000 | H | 4.555450000  | -2.655803000 | -0.009544000 |
| C  | -1.232949000 | 2.788695000  | 0.005235000  | H | -2.611798000 | 4.561397000  | 0.003232000  |
| C  | -1.230014000 | -2.789980000 | 0.005275000  | H | -2.637951000 | -4.546371000 | 0.002520000  |
| C  | -2.803404000 | 1.231280000  | -0.019301000 | H | -4.551414000 | 2.659179000  | -0.041686000 |
| C  | -2.802108000 | -1.234201000 | -0.019252000 | H | -4.566642000 | -2.633162000 | -0.042523000 |
| C  | 2.514690000  | 3.479016000  | 0.014387000  | C | 0.012266000  | 3.417182000  | 0.019109000  |
| C  | 2.518348000  | -3.476388000 | 0.014465000  | C | -0.007333000 | -3.417041000 | 0.019037000  |
| C  | 3.484395000  | 2.517307000  | 0.000450000  | C | -3.449724000 | 0.009910000  | -0.039497000 |

|   |              |              |              |
|---|--------------|--------------|--------------|
| C | 3.448643000  | -0.009787000 | -0.035732000 |
| H | 0.015550000  | 4.503631000  | 0.030485000  |
| H | -0.010114000 | -4.503491000 | 0.030485000  |
| H | -4.535803000 | 0.013117000  | -0.058215000 |
| H | 4.534958000  | -0.012851000 | -0.039592000 |
| O | 0.002528000  | -0.000502000 | -1.757046000 |
| H | -0.882711000 | -0.003494000 | 2.144720000  |
| O | 0.047527000  | -0.000394000 | 1.828899000  |

### 1<sup>-5</sup>ts1<sub>(hs)</sub>

|    |              |              |              |
|----|--------------|--------------|--------------|
| Fe | -0.090729000 | 0.023624000  | -0.122025000 |
| N  | -1.829591000 | 1.136915000  | -0.055671000 |
| N  | -1.247207000 | -1.744692000 | -0.119222000 |
| N  | 1.052534000  | 1.796463000  | -0.140610000 |
| N  | 1.631624000  | -1.082243000 | -0.237408000 |
| C  | -1.895703000 | 2.510882000  | 0.023758000  |
| C  | -0.743013000 | -3.018785000 | -0.136333000 |
| C  | -3.110796000 | 0.638363000  | 0.039910000  |
| C  | -2.612374000 | -1.819482000 | -0.026588000 |
| C  | 0.550331000  | 3.070209000  | -0.087384000 |
| C  | 1.701108000  | -2.456572000 | -0.261521000 |
| C  | 2.416532000  | 1.871550000  | -0.248757000 |
| C  | 2.910497000  | -0.585198000 | -0.341034000 |
| C  | -3.292905000 | 2.904288000  | 0.153713000  |
| C  | -1.853388000 | -3.965059000 | -0.060818000 |
| C  | -4.038721000 | 1.755068000  | 0.163219000  |
| C  | -3.005529000 | -3.226062000 | 0.006063000  |
| C  | 1.661457000  | 4.016573000  | -0.152915000 |
| C  | 3.099906000  | -2.852250000 | -0.368237000 |
| C  | 2.811355000  | 3.277984000  | -0.253771000 |
| C  | 3.842300000  | -1.701963000 | -0.420092000 |
| H  | -3.640362000 | 3.926214000  | 0.234157000  |
| H  | -1.751421000 | -5.042772000 | -0.056232000 |
| H  | -5.112988000 | 1.656826000  | 0.251896000  |
| H  | -4.024585000 | -3.584845000 | 0.074471000  |
| H  | 1.561225000  | 5.094218000  | -0.130097000 |
| H  | 3.450153000  | -3.875624000 | -0.406094000 |
| H  | 3.830016000  | 3.636973000  | -0.326555000 |
| H  | 4.916895000  | -1.603567000 | -0.503210000 |
| C  | -0.808426000 | 3.392726000  | -0.002825000 |
| C  | 0.616564000  | -3.340143000 | -0.203611000 |
| C  | 3.270503000  | 0.767656000  | -0.341697000 |
| C  | -3.469106000 | -0.715319000 | 0.038695000  |
| H  | -1.051681000 | 4.451363000  | 0.050231000  |
| H  | 0.863060000  | -4.399261000 | -0.218662000 |
| H  | 4.333538000  | 0.980850000  | -0.424351000 |
| H  | -4.532301000 | -0.929408000 | 0.117495000  |
| O  | -0.104084000 | 0.022181000  | 1.714944000  |
| H  | -1.026647000 | 0.358947000  | -2.276357000 |
| H  | 0.830420000  | -0.259900000 | 2.170515000  |
| H  | 2.774465000  | 0.231902000  | 2.453188000  |
| H  | 1.903132000  | -0.575853000 | 3.875443000  |
| H  | 2.393807000  | -1.569981000 | 2.389127000  |
| C  | 2.170163000  | -0.595825000 | 2.818680000  |
| O  | -0.137644000 | 0.049415000  | -1.997779000 |

### 1<sup>-3</sup>ts1<sub>(is)</sub>

|    |              |              |              |
|----|--------------|--------------|--------------|
| Fe | -0.096193000 | 0.003872000  | -0.117632000 |
| N  | -1.345576000 | -1.594189000 | -0.077090000 |
| N  | 1.514788000  | -1.206223000 | -0.217002000 |
| N  | -1.719132000 | 1.219512000  | -0.041409000 |
| N  | 1.143133000  | 1.600133000  | -0.177044000 |
| C  | -2.722715000 | -1.589234000 | -0.014301000 |
| C  | 2.834871000  | -0.841580000 | -0.372622000 |
| C  | -0.955642000 | -2.915728000 | -0.045477000 |
| C  | 1.491537000  | -2.583722000 | -0.172945000 |
| C  | -3.047570000 | 0.853255000  | 0.018810000  |
| C  | 2.511814000  | 1.597500000  | -0.338429000 |
| C  | -1.689066000 | 2.596701000  | 0.024345000  |
| C  | 0.758742000  | 2.921772000  | -0.109666000 |

|   |              |              |              |
|---|--------------|--------------|--------------|
| C | -3.219716000 | -2.953430000 | 0.042779000  |
| C | 3.674449000  | -2.025666000 | -0.411520000 |
| C | -2.126675000 | -3.773548000 | 0.028361000  |
| C | 2.844262000  | -3.103675000 | -0.281016000 |
| C | -3.883534000 | 2.037837000  | 0.109737000  |
| C | 3.010502000  | 2.961716000  | -0.359208000 |
| C | -3.043189000 | 3.115668000  | 0.117522000  |
| C | 1.926581000  | 3.780883000  | -0.212289000 |
| H | -4.266250000 | -3.223427000 | 0.095599000  |
| H | 4.750685000  | -2.011352000 | -0.521883000 |
| H | -2.093189000 | -4.854517000 | 0.064109000  |
| H | 3.099451000  | -4.155130000 | -0.268283000 |
| H | -4.963982000 | 2.023440000  | 0.167364000  |
| H | 4.051978000  | 3.232590000  | -0.472027000 |
| H | -3.293624000 | 4.166496000  | 0.180576000  |
| H | 1.896219000  | 4.862122000  | -0.183365000 |
| C | -3.520660000 | -0.452783000 | 0.015934000  |
| C | 3.304152000  | 0.462564000  | -0.441849000 |
| C | -0.546192000 | 3.384779000  | -0.001332000 |
| C | 0.353920000  | -3.375402000 | -0.080471000 |
| H | -4.596167000 | -0.596390000 | 0.068296000  |
| H | 4.374188000  | 0.605725000  | -0.561618000 |
| H | -0.686250000 | 4.461208000  | 0.048233000  |
| H | 0.501361000  | -4.451617000 | -0.052603000 |
| O | -0.098665000 | -0.012302000 | 1.727397000  |
| H | -1.100578000 | 0.015764000  | -2.266721000 |
| H | 0.878719000  | -0.047164000 | 2.168250000  |
| H | 2.734045000  | 0.779194000  | 2.313494000  |
| H | 2.049355000  | -0.020836000 | 3.839315000  |
| H | 2.636272000  | -1.058629000 | 2.419881000  |
| C | 2.280892000  | -0.094181000 | 2.776659000  |
| O | -0.156872000 | 0.014162000  | -1.996209000 |

### 1<sup>-1</sup>ts1<sub>(ls)</sub>

|    |              |              |              |
|----|--------------|--------------|--------------|
| Fe | -0.075503000 | -0.010560000 | -0.129739000 |
| N  | -1.935718000 | -0.807196000 | 0.004145000  |
| N  | 0.703304000  | -1.862066000 | -0.165463000 |
| N  | -0.859086000 | 1.873068000  | -0.106326000 |
| N  | 1.763834000  | 0.795500000  | -0.231599000 |
| C  | -3.121283000 | -0.107576000 | 0.021161000  |
| C  | 2.035190000  | -2.189953000 | -0.307476000 |
| C  | -2.267313000 | -2.139234000 | 0.061207000  |
| C  | 0.016713000  | -3.056774000 | -0.087911000 |
| C  | -2.202767000 | 2.188628000  | -0.065599000 |
| C  | 2.954712000  | 0.100459000  | -0.342965000 |
| C  | -0.176807000 | 3.071426000  | -0.085109000 |
| C  | 2.105037000  | 2.138495000  | -0.172691000 |
| C  | -4.242420000 | -1.033164000 | 0.100011000  |
| C  | 2.195221000  | -3.635316000 | -0.314154000 |
| C  | -3.713007000 | -2.291656000 | 0.128940000  |
| C  | 0.946677000  | -4.170905000 | -0.174206000 |
| C  | -2.369800000 | 3.631653000  | -0.034826000 |
| C  | 4.070487000  | 1.026002000  | -0.345051000 |
| C  | -1.116271000 | 4.178378000  | -0.041477000 |
| C  | 3.546285000  | 2.284981000  | -0.233543000 |
| H  | -5.282683000 | -0.736222000 | 0.128680000  |
| H  | 3.143545000  | -4.147204000 | -0.412414000 |
| H  | -4.229321000 | -3.241160000 | 0.183342000  |
| H  | 0.659193000  | -5.213519000 | -0.137105000 |
| H  | -3.325861000 | 4.137699000  | -0.002940000 |
| H  | 5.109451000  | 0.732521000  | -0.418325000 |
| H  | -0.835466000 | 5.223329000  | -0.020240000 |
| H  | 4.068044000  | 3.232564000  | -0.203195000 |
| C  | -3.247684000 | 1.274780000  | -0.020699000 |

|   |              |              |              |
|---|--------------|--------------|--------------|
| C | 3.081173000  | -1.280981000 | -0.398941000 |
| C | 1.207794000  | 3.196286000  | -0.102328000 |
| C | -1.359063000 | -3.189902000 | 0.030835000  |
| H | -4.256078000 | 1.679483000  | 0.006556000  |
| H | 4.085765000  | -1.684417000 | -0.491352000 |
| H | 1.621348000  | 4.200561000  | -0.072218000 |
| H | -1.759735000 | -4.198848000 | 0.079987000  |
| O | -0.109969000 | 0.054623000  | 1.716404000  |
| H | -0.089735000 | 0.855154000  | -2.332353000 |
| H | 0.654090000  | 0.600195000  | 2.168146000  |
| H | 2.631092000  | 0.680614000  | 2.470217000  |
| H | 1.668840000  | -0.184743000 | 3.804845000  |
| H | 2.053922000  | -1.045554000 | 2.219573000  |
| C | 1.933819000  | -0.110484000 | 2.751327000  |
| O | -0.305013000 | -0.044860000 | -2.004194000 |

### 1-<sup>7</sup>int1<sub>(hs)</sub>

|    |              |              |              |
|----|--------------|--------------|--------------|
| Fe | -0.158147000 | 0.023544000  | -0.149298000 |
| N  | -2.216979000 | 0.267151000  | 0.021556000  |
| N  | -0.386707000 | -2.079751000 | -0.038621000 |
| N  | 0.113015000  | 2.086466000  | -0.137957000 |
| N  | 1.932059000  | -0.256291000 | -0.364199000 |
| C  | -2.871888000 | 1.470908000  | 0.085232000  |
| C  | 0.617406000  | -3.012520000 | -0.146945000 |
| C  | -3.139309000 | -0.745577000 | 0.115493000  |
| C  | -1.591746000 | -2.734860000 | 0.035882000  |
| C  | -0.890243000 | 3.018182000  | -0.050469000 |
| C  | 2.592044000  | -1.462349000 | -0.378217000 |
| C  | 1.316902000  | 2.739289000  | -0.239898000 |
| C  | 2.859783000  | 0.754323000  | -0.420346000 |
| C  | -4.302630000 | 1.211449000  | 0.215418000  |
| C  | 0.017367000  | -4.342347000 | -0.114928000 |
| C  | -4.466951000 | -0.149555000 | 0.233363000  |
| C  | -1.339397000 | -4.171731000 | -0.003573000 |
| C  | -0.289894000 | 4.348227000  | -0.091680000 |
| C  | 4.024250000  | -1.203612000 | -0.481256000 |
| C  | 1.065329000  | 4.176961000  | -0.207071000 |
| C  | 4.188437000  | 0.158481000  | -0.507527000 |
| H  | -5.066943000 | 1.974561000  | 0.286564000  |
| H  | 0.567345000  | -5.272559000 | -0.178598000 |
| H  | -5.390531000 | -0.706895000 | 0.322835000  |
| H  | -2.103730000 | -4.936947000 | 0.041393000  |
| H  | -0.840793000 | 5.278434000  | -0.038973000 |
| H  | 4.791482000  | -1.966412000 | -0.514418000 |
| H  | 1.829767000  | 4.940871000  | -0.266843000 |
| H  | 5.114703000  | 0.715443000  | -0.564242000 |
| C  | -2.259208000 | 2.731596000  | 0.049656000  |
| C  | 1.982575000  | -2.722953000 | -0.289991000 |
| C  | 2.570171000  | 2.126043000  | -0.370315000 |
| C  | -2.849143000 | -2.116983000 | 0.116731000  |
| H  | -2.924716000 | 3.589391000  | 0.111021000  |
| H  | 2.650194000  | -3.580136000 | -0.337888000 |
| H  | 3.424836000  | 2.795792000  | -0.428258000 |
| H  | -3.704623000 | -2.785096000 | 0.185006000  |
| O  | 0.086190000  | 0.004311000  | 1.804920000  |
| H  | 0.500642000  | -0.356328000 | -2.545510000 |
| H  | 0.098720000  | -0.902046000 | 2.177861000  |
| O  | -0.317136000 | -0.082983000 | -2.081350000 |
| H  | 2.027086000  | 0.189568000  | 2.558621000  |
| H  | 3.328728000  | 0.291147000  | 3.941333000  |
| H  | 3.828950000  | -0.249034000 | 2.218236000  |
| C  | 3.055906000  | 0.072772000  | 2.910372000  |

### 1-<sup>5</sup>int1<sub>(hs)</sub>

|    |              |              |              |
|----|--------------|--------------|--------------|
| Fe | -0.158526000 | 0.023692000  | -0.149262000 |
| N  | -2.215830000 | 0.279124000  | 0.021341000  |
| N  | -0.398540000 | -2.078406000 | -0.037409000 |
| N  | 0.123934000  | 2.084999000  | -0.139658000 |
| N  | 1.930300000  | -0.268280000 | -0.363772000 |
| C  | -2.864130000 | 1.486454000  | 0.084702000  |
| C  | 0.600307000  | -3.016886000 | -0.144998000 |
| C  | -3.143611000 | -0.728539000 | 0.116327000  |
| C  | -1.607224000 | -2.726592000 | 0.037593000  |
| C  | -0.873939000 | 3.022479000  | -0.052329000 |
| C  | 2.583636000  | -1.477928000 | -0.377065000 |
| C  | 1.331574000  | 2.730880000  | -0.241945000 |
| C  | 2.863450000  | 0.737206000  | -0.421281000 |
| C  | -4.296210000 | 1.234869000  | 0.215627000  |
| C  | -0.007244000 | -4.343308000 | -0.112118000 |
| C  | -4.467923000 | -0.125210000 | 0.234468000  |
| C  | -1.363015000 | -4.164935000 | -0.000907000 |
| C  | -0.265996000 | 4.349033000  | -0.094109000 |
| C  | 4.017242000  | -1.227097000 | -0.480659000 |
| C  | 1.088219000  | 4.169968000  | -0.209620000 |
| C  | 4.188814000  | 0.134068000  | -0.508211000 |
| H  | -5.056323000 | 2.002164000  | 0.286747000  |
| H  | 0.537453000  | -5.276665000 | -0.175175000 |
| H  | -5.394468000 | -0.677485000 | 0.324725000  |
| H  | -2.131646000 | -4.925805000 | 0.044591000  |
| H  | -0.811553000 | 5.282397000  | -0.041632000 |
| H  | 4.780314000  | -1.994077000 | -0.513500000 |
| H  | 1.856992000  | 4.929485000  | -0.269731000 |
| H  | 5.118080000  | 0.685941000  | -0.565592000 |
| C  | -2.244485000 | 2.743706000  | 0.048294000  |
| C  | 1.967109000  | -2.735080000 | -0.287983000 |
| C  | 2.581359000  | 2.110519000  | -0.372173000 |
| C  | -2.861087000 | -2.101521000 | 0.118271000  |
| H  | -2.905152000 | 3.605244000  | 0.109467000  |
| H  | 2.629928000  | -3.596018000 | -0.335271000 |
| H  | 3.439710000  | 2.775485000  | -0.430647000 |
| H  | -3.720290000 | -2.764771000 | 0.187242000  |
| O  | 0.086845000  | 0.003447000  | 1.804713000  |
| H  | 0.498963000  | -0.365355000 | -2.544655000 |
| H  | 0.105910000  | -0.903012000 | 2.176987000  |
| O  | -0.316738000 | -0.084843000 | -2.081151000 |
| H  | 2.034257000  | 0.200252000  | 2.556081000  |
| H  | 3.337007000  | 0.302300000  | 3.937276000  |
| H  | 3.830441000  | -0.263183000 | 2.220237000  |
| C  | 3.061844000  | 0.077284000  | 2.908392000  |

### 1-<sup>5</sup>int1<sub>(is)</sub>

|    |              |              |              |
|----|--------------|--------------|--------------|
| Fe | 0.118525000  | -0.004388000 | -0.143213000 |
| N  | 0.203949000  | 2.031251000  | -0.058507000 |
| N  | -2.001786000 | 0.090935000  | -0.302594000 |
| N  | 2.267919000  | -0.080206000 | -0.055510000 |
| N  | 0.052645000  | -2.029096000 | -0.139264000 |
| C  | 1.352376000  | 2.798222000  | 0.000219000  |
| C  | -2.836490000 | -0.987491000 | -0.381392000 |
| C  | -0.877159000 | 2.885628000  | -0.168578000 |
| C  | -2.754838000 | 1.229095000  | -0.360834000 |
| C  | 3.103138000  | 0.997632000  | 0.081790000  |
| C  | -1.093135000 | -2.789384000 | -0.220955000 |
| C  | 3.014499000  | -1.223498000 | 0.064278000  |
| C  | 1.130581000  | -2.881431000 | -0.050522000 |
| C  | 0.976363000  | 4.203106000  | -0.048892000 |
| C  | -4.214182000 | -0.511563000 | -0.504219000 |
| C  | -0.389173000 | 4.256349000  | -0.153806000 |
| C  | -4.163948000 | 0.859032000  | -0.492207000 |

|   |              |              |              |
|---|--------------|--------------|--------------|
| C | 4.470597000  | 0.516339000  | 0.263408000  |
| C | -0.721413000 | -4.198131000 | -0.178871000 |
| C | 4.415460000  | -0.854866000 | 0.253380000  |
| C | 0.642557000  | -4.254950000 | -0.072632000 |
| H | 1.676217000  | 5.028225000  | -0.016284000 |
| H | -5.088955000 | -1.144254000 | -0.584457000 |
| H | -1.019478000 | 5.133646000  | -0.221884000 |
| H | -4.989784000 | 1.555747000  | -0.561019000 |
| H | 5.341996000  | 1.145168000  | 0.396213000  |
| H | -1.423275000 | -5.020878000 | -0.223442000 |
| H | 5.233776000  | -1.553456000 | 0.374901000  |
| H | 1.272586000  | -5.133238000 | -0.015370000 |
| C | 2.671000000  | 2.329092000  | 0.081420000  |
| C | -2.407303000 | -2.318196000 | -0.335579000 |
| C | 2.480864000  | -2.516799000 | 0.043121000  |
| C | -2.224641000 | 2.522290000  | -0.294112000 |
| H | 3.441906000  | 3.092263000  | 0.161094000  |
| H | -3.180622000 | -3.080757000 | -0.393492000 |
| H | 3.189514000  | -3.337506000 | 0.128757000  |
| H | -2.933289000 | 3.344899000  | -0.357246000 |
| O | 0.025993000  | -0.057412000 | 1.720206000  |
| H | 1.162462000  | -0.059864000 | -2.243717000 |
| H | -0.026649000 | 0.859103000  | 2.064002000  |
| O | 0.220111000  | 0.032800000  | -1.988368000 |
| H | -1.964759000 | -0.236945000 | 2.520293000  |
| H | -3.199425000 | -0.211569000 | 3.961766000  |
| H | -3.785341000 | 0.115534000  | 2.210235000  |
| C | -2.977893000 | -0.106361000 | 2.901585000  |

### 1-<sup>3</sup>int1<sub>(is)</sub>

|    |              |              |              |
|----|--------------|--------------|--------------|
| Fe | 0.118677000  | -0.004276000 | -0.142959000 |
| N  | 0.204540000  | 2.031297000  | -0.058697000 |
| N  | -2.001765000 | 0.091636000  | -0.301884000 |
| N  | 2.268025000  | -0.080855000 | -0.055777000 |
| N  | 0.052257000  | -2.028967000 | -0.138970000 |
| C  | 1.353189000  | 2.797864000  | 0.000077000  |
| C  | -2.836643000 | -0.986557000 | -0.381909000 |
| C  | -0.876325000 | 2.886008000  | -0.168372000 |
| C  | -2.754491000 | 1.230019000  | -0.360537000 |
| C  | 3.103490000  | 0.996790000  | 0.081420000  |
| C  | -1.093751000 | -2.788905000 | -0.221258000 |
| C  | 3.014292000  | -1.224312000 | 0.064355000  |
| C  | 1.129888000  | -2.881678000 | -0.050186000 |
| C  | 0.977616000  | 4.202902000  | -0.048692000 |
| C  | -4.214120000 | -0.510283000 | -0.505530000 |
| C  | -0.387914000 | 4.256597000  | -0.153361000 |
| C  | -4.163576000 | 0.860315000  | -0.493029000 |
| C  | 4.470825000  | 0.515177000  | 0.263225000  |
| C  | -0.722479000 | -4.197762000 | -0.179362000 |
| C  | 4.415350000  | -0.856007000 | 0.253412000  |
| C  | 0.641443000  | -4.255030000 | -0.072702000 |
| H  | 1.677762000  | 5.027774000  | -0.016027000 |
| H  | -5.088990000 | -1.142721000 | -0.586666000 |
| H  | -1.017976000 | 5.134091000  | -0.221134000 |
| H  | -4.989217000 | 1.557217000  | -0.562359000 |
| H  | 5.342367000  | 1.143810000  | 0.395988000  |
| H  | -1.424576000 | -5.020283000 | -0.224378000 |
| H  | 5.233469000  | -1.554792000 | 0.375162000  |
| H  | 1.271175000  | -5.133534000 | -0.015459000 |
| C  | 2.671692000  | 2.328349000  | 0.081027000  |
| C  | -2.407752000 | -2.317367000 | -0.336343000 |
| C  | 2.480291000  | -2.517465000 | 0.043493000  |
| C  | -2.223927000 | 2.523069000  | -0.293749000 |
| H  | 3.442803000  | 3.091309000  | 0.160687000  |

|   |              |              |              |
|---|--------------|--------------|--------------|
| H | -3.181195000 | -3.079750000 | -0.394981000 |
| H | 3.188680000  | -3.338379000 | 0.129278000  |
| H | -2.932324000 | 3.345889000  | -0.356959000 |
| O | 0.026716000  | -0.056588000 | 1.720554000  |
| H | 1.161927000  | -0.061431000 | -2.243695000 |
| H | -0.030057000 | 0.859618000  | 2.064452000  |
| O | 0.219768000  | 0.032571000  | -1.988177000 |
| H | -1.967192000 | -0.244474000 | 2.522633000  |
| H | -3.201959000 | -0.203625000 | 3.963421000  |
| H | -3.785835000 | 0.113650000  | 2.209299000  |
| C | -2.980054000 | -0.108861000 | 2.902346000  |

### 1-<sup>3</sup>int1<sub>(ls)</sub>

|    |              |              |              |
|----|--------------|--------------|--------------|
| Fe | -0.138618000 | -0.001761000 | -0.134854000 |
| N  | -2.070454000 | -0.572365000 | 0.032071000  |
| N  | 0.407736000  | -1.942819000 | -0.185686000 |
| N  | -0.673571000 | 1.955065000  | -0.066796000 |
| N  | 1.797266000  | 0.589522000  | -0.295189000 |
| C  | -3.158272000 | 0.266376000  | 0.118183000  |
| C  | 1.692927000  | -2.417836000 | -0.312811000 |
| C  | -2.560054000 | -1.857109000 | 0.079691000  |
| C  | -0.410844000 | -3.045120000 | -0.103064000 |
| C  | -1.967493000 | 2.432367000  | 0.036071000  |
| C  | 2.882516000  | -0.253666000 | -0.423178000 |
| C  | 0.150018000  | 3.066872000  | -0.105167000 |
| C  | 2.298972000  | 1.876914000  | -0.302929000 |
| C  | -4.379761000 | -0.517069000 | 0.221881000  |
| C  | 1.686361000  | -3.872824000 | -0.307904000 |
| C  | -4.009023000 | -1.831246000 | 0.199479000  |
| C  | 0.384082000  | -4.261075000 | -0.176933000 |
| C  | -1.955926000 | 3.882858000  | 0.059232000  |
| C  | 4.102653000  | 0.525721000  | -0.517454000 |
| C  | -0.648069000 | 4.275013000  | -0.025890000 |
| C  | 3.742906000  | 1.843156000  | -0.439068000 |
| H  | -5.373341000 | -0.096113000 | 0.302201000  |
| H  | 2.571057000  | -4.489941000 | -0.392455000 |
| H  | -4.635625000 | -2.711490000 | 0.256826000  |
| H  | -0.021839000 | -5.263087000 | -0.133453000 |
| H  | -2.841062000 | 4.500756000  | 0.134272000  |
| H  | 5.092708000  | 0.101844000  | -0.620687000 |
| H  | -0.244003000 | 5.278751000  | -0.035840000 |
| H  | 4.377031000  | 2.719288000  | -0.470298000 |
| C  | -3.115248000 | 1.654516000  | 0.116300000  |
| C  | 2.837234000  | -1.641007000 | -0.429622000 |
| C  | 1.535250000  | 3.034066000  | -0.210214000 |
| C  | -1.792802000 | -3.011839000 | 0.021701000  |
| H  | -4.063310000 | 2.179817000  | 0.193344000  |
| H  | 3.784280000  | -2.164937000 | -0.522638000 |
| H  | 2.059934000  | 3.984910000  | -0.228413000 |
| H  | -2.314528000 | -3.963343000 | 0.073122000  |
| O  | 0.012795000  | -0.058781000 | 1.749195000  |
| H  | -0.016764000 | 0.844473000  | -2.332038000 |
| H  | 0.300666000  | 0.831525000  | 2.046508000  |
| O  | -0.309136000 | -0.031999000 | -2.000421000 |
| H  | 3.739391000  | 0.304821000  | 2.264507000  |
| H  | 3.317972000  | -0.590498000 | 3.857340000  |
| H  | 2.009980000  | -0.401347000 | 2.495604000  |
| C  | 3.018809000  | -0.232273000 | 2.874583000  |

### 1-<sup>1</sup>int1<sub>(ls)</sub>

|    |              |              |              |
|----|--------------|--------------|--------------|
| Fe | -0.138812000 | -0.001520000 | -0.134633000 |
| N  | -2.078746000 | -0.544185000 | 0.032380000  |
| N  | 0.379810000  | -1.950219000 | -0.182801000 |

|   |              |              |              |
|---|--------------|--------------|--------------|
| N | -0.645541000 | 1.962822000  | -0.069242000 |
| N | 1.805525000  | 0.561664000  | -0.295718000 |
| C | -3.154372000 | 0.310196000  | 0.117247000  |
| C | 1.657959000  | -2.443832000 | -0.310179000 |
| C | -2.586607000 | -1.821698000 | 0.082320000  |
| C | -0.454529000 | -3.040546000 | -0.098715000 |
| C | -1.932496000 | 2.458780000  | 0.032911000  |
| C | 2.878513000  | -0.297143000 | -0.423286000 |
| C | 0.193997000  | 3.062606000  | -0.108414000 |
| C | 2.325621000  | 1.841694000  | -0.305042000 |
| C | -4.386958000 | -0.455520000 | 0.222239000  |
| C | 1.630451000  | -3.898568000 | -0.303758000 |
| C | -4.035046000 | -1.774908000 | 0.202098000  |
| C | 0.322796000  | -4.267899000 | -0.171678000 |
| C | -1.900028000 | 3.908973000  | 0.054928000  |
| C | 4.109648000  | 0.464587000  | -0.519272000 |
| C | -0.586656000 | 4.282179000  | -0.030270000 |
| C | 3.768856000  | 1.787118000  | -0.441967000 |
| H | -5.374419000 | -0.020297000 | 0.301952000  |
| H | 2.506134000  | -4.528427000 | -0.388181000 |
| H | -4.674158000 | -2.646007000 | 0.260995000  |
| H | -0.097452000 | -5.263931000 | -0.126981000 |
| H | -2.776201000 | 4.539597000  | 0.129266000  |
| H | 5.093445000  | 0.026494000  | -0.622909000 |
| H | -0.168228000 | 5.279999000  | -0.040941000 |
| H | 4.415343000  | 2.654101000  | -0.474980000 |
| C | -3.091333000 | 1.697597000  | 0.113624000  |
| C | 2.813276000  | -1.683684000 | -0.428391000 |
| C | 1.578627000  | 3.009791000  | -0.213377000 |
| C | -1.835857000 | -2.987322000 | 0.026241000  |
| H | -4.031773000 | 2.236521000  | 0.189958000  |
| H | 3.752688000  | -2.221206000 | -0.521274000 |
| H | 2.116868000  | 3.953004000  | -0.232429000 |
| H | -2.371026000 | -3.931249000 | 0.079084000  |
| O | 0.010435000  | -0.057260000 | 1.749693000  |
| H | -0.006722000 | 0.839430000  | -2.333442000 |
| H | 0.307936000  | 0.830204000  | 2.045933000  |
| O | -0.310255000 | -0.032602000 | -2.000144000 |
| H | 3.741713000  | 0.289738000  | 2.255570000  |
| H | 3.316703000  | -0.574070000 | 3.864987000  |
| H | 2.011807000  | -0.410606000 | 2.497355000  |
| C | 3.020417000  | -0.236643000 | 2.874037000  |

**1<sup>-7</sup>ts<sub>2</sub>(<sub>hs</sub>)**

|    |              |              |              |
|----|--------------|--------------|--------------|
| Fe | -0.091485000 | 0.046103000  | -0.253202000 |
| N  | 0.635292000  | -1.951929000 | -0.197203000 |
| N  | -2.045362000 | -0.707951000 | -0.014802000 |
| N  | -0.802781000 | 1.982593000  | -0.148721000 |
| N  | 1.878438000  | 0.744525000  | -0.245190000 |
| C  | -0.136048000 | -3.096193000 | -0.122085000 |
| C  | 0.748203000  | -4.248419000 | -0.128289000 |
| H  | 0.422812000  | -5.279767000 | -0.077546000 |
| C  | 2.037103000  | -3.772739000 | -0.199030000 |
| H  | 2.955992000  | -4.344515000 | -0.219906000 |
| C  | 1.958842000  | -2.319520000 | -0.236730000 |
| C  | 3.048181000  | -1.431285000 | -0.278487000 |
| H  | 4.035753000  | -1.885597000 | -0.294034000 |
| C  | 3.012789000  | -0.028688000 | -0.271989000 |
| C  | 4.173558000  | 0.852752000  | -0.259331000 |
| H  | 5.203111000  | 0.519079000  | -0.271742000 |
| C  | 3.704307000  | 2.142806000  | -0.225613000 |
| H  | 4.279485000  | 3.059484000  | -0.203223000 |
| C  | 2.251283000  | 2.070808000  | -0.215043000 |
| C  | 1.369631000  | 3.157511000  | -0.168181000 |

|   |              |              |              |
|---|--------------|--------------|--------------|
| H | 1.825666000  | 4.144392000  | -0.141719000 |
| C | -0.030389000 | 3.123693000  | -0.127331000 |
| C | -0.911311000 | 4.274638000  | -0.017521000 |
| H | -0.581075000 | 5.304884000  | 0.018359000  |
| C | -2.198334000 | 3.798636000  | 0.038624000  |
| H | -3.114567000 | 4.366900000  | 0.133118000  |
| C | -2.124244000 | 2.346135000  | -0.032448000 |
| C | -3.212781000 | 1.464749000  | 0.041136000  |
| H | -4.195493000 | 1.923281000  | 0.118951000  |
| C | -3.179817000 | 0.063853000  | 0.061013000  |
| C | -4.336567000 | -0.819993000 | 0.163581000  |
| H | -5.363523000 | -0.487629000 | 0.243925000  |
| C | -3.865471000 | -2.108426000 | 0.141251000  |
| H | -4.436921000 | -3.026290000 | 0.196902000  |
| C | -2.415664000 | -2.036167000 | 0.023927000  |
| C | -1.535490000 | -3.123893000 | -0.029260000 |
| H | -1.990823000 | -4.110478000 | 0.020588000  |
| O | -0.040257000 | -0.030409000 | 1.788807000  |
| H | -0.384491000 | -0.892229000 | 2.105953000  |
| O | -0.187075000 | -0.090696000 | -2.159369000 |
| H | 0.161123000  | -0.912572000 | -2.559573000 |
| C | 1.942068000  | -0.105671000 | 2.859065000  |
| H | 2.143654000  | 0.874453000  | 2.452584000  |
| H | 1.495289000  | -0.200931000 | 3.841795000  |
| H | 2.283051000  | -0.980483000 | 2.321181000  |

**1<sup>-5</sup>ts<sub>2</sub>(<sub>hs</sub>)**

|    |              |              |              |
|----|--------------|--------------|--------------|
| Fe | -0.104318000 | 0.023738000  | -0.189888000 |
| N  | -0.529014000 | -2.046210000 | -0.045732000 |
| N  | -2.139438000 | 0.451441000  | -0.012102000 |
| N  | 0.352717000  | 2.057067000  | -0.144532000 |
| N  | 1.943295000  | -0.433379000 | -0.354025000 |
| C  | -1.790597000 | -2.590909000 | 0.003717000  |
| C  | -1.667465000 | -4.043864000 | -0.018860000 |
| H  | -2.498392000 | -4.737019000 | 0.011460000  |
| C  | -0.328242000 | -4.336359000 | -0.092029000 |
| H  | 0.137179000  | -5.312818000 | -0.134919000 |
| C  | 0.387914000  | -3.066618000 | -0.119361000 |
| C  | 1.778033000  | -2.897153000 | -0.216856000 |
| H  | 2.371931000  | -3.808343000 | -0.220794000 |
| C  | 2.494524000  | -1.695501000 | -0.301271000 |
| C  | 3.946917000  | -1.566921000 | -0.304986000 |
| H  | 4.641937000  | -2.396146000 | -0.271606000 |
| C  | 4.235478000  | -0.226478000 | -0.334523000 |
| H  | 5.210244000  | 0.243895000  | -0.328252000 |
| C  | 2.964899000  | 0.488202000  | -0.350688000 |
| C  | 2.806034000  | 1.880496000  | -0.310674000 |
| H  | 3.721463000  | 2.467052000  | -0.330525000 |
| C  | 1.608424000  | 2.605722000  | -0.216160000 |
| C  | 1.482532000  | 4.058454000  | -0.176034000 |
| H  | 2.310997000  | 4.754023000  | -0.214759000 |
| C  | 0.144036000  | 4.345209000  | -0.084826000 |
| H  | -0.325268000 | 5.319324000  | -0.034462000 |
| C  | -0.569011000 | 3.073196000  | -0.065454000 |
| C  | -1.958955000 | 2.908331000  | 0.013120000  |
| H  | -2.545261000 | 3.822914000  | 0.065129000  |
| C  | -2.684035000 | 1.709229000  | 0.037588000  |
| C  | -4.136071000 | 1.582540000  | 0.137439000  |
| H  | -4.828118000 | 2.412993000  | 0.193769000  |
| C  | -4.424903000 | 0.243201000  | 0.146721000  |
| H  | -5.397225000 | -0.227782000 | 0.213149000  |
| C  | -3.153323000 | -0.471375000 | 0.054873000  |
| C  | -2.988774000 | -1.862803000 | 0.055762000  |
| H  | -3.902168000 | -2.451386000 | 0.103771000  |

|   |              |              |              |
|---|--------------|--------------|--------------|
| O | 0.037668000  | -0.001630000 | 1.799928000  |
| H | -0.105434000 | -0.904813000 | 2.153312000  |
| O | -0.336079000 | -0.053426000 | -2.124154000 |
| H | 0.498519000  | -0.248267000 | -2.599789000 |
| C | 2.169929000  | -0.015124000 | 2.853759000  |
| H | 2.303126000  | 0.944332000  | 2.376267000  |
| H | 1.728542000  | -0.072888000 | 3.841703000  |
| H | 2.480491000  | -0.913094000 | 2.334639000  |

**1<sup>-5</sup>ts<sub>(is)</sub>**

|    |              |              |               |
|----|--------------|--------------|---------------|
| Fe | 0.087865000  | 0.017979000  | -0.217739000  |
| N  | 1.236299000  | -1.748682000 | -0.170056000  |
| N  | -1.649535000 | -1.129826000 | -0.282144000  |
| N  | -1.062141000 | 1.784998000  | -0.189868000  |
| N  | 1.808137000  | 1.152365000  | 0.053421000   |
| C  | 2.600059000  | -1.809382000 | -0.019501000  |
| C  | 3.001501000  | -3.210767000 | 0.061494000   |
| H  | 4.019266000  | -3.560827000 | 0.179798000   |
| C  | 1.855937000  | -3.961932000 | -0.016858000  |
| H  | 1.764225000  | -5.040150000 | 0.022333000   |
| C  | 0.740287000  | -3.029997000 | -0.151168000  |
| C  | -0.618434000 | -3.369723000 | -0.208750000  |
| C  | -1.717841000 | -2.500173000 | -0.256308000  |
| C  | -3.123006000 | -2.900511000 | -0.270623000  |
| H  | -3.477731000 | -3.923372000 | -0.256932000  |
| C  | -3.867305000 | -1.749945000 | -0.300585000  |
| H  | -4.945665000 | -1.654222000 | -0.3111211000 |
| C  | -2.928079000 | -0.631011000 | -0.302186000  |
| C  | -3.280702000 | 0.725888000  | -0.301506000  |
| C  | -2.429839000 | 1.838951000  | -0.253835000  |
| C  | -2.844972000 | 3.241141000  | -0.245186000  |
| H  | -3.869976000 | 3.587352000  | -0.289423000  |
| C  | -1.702968000 | 3.997114000  | -0.174998000  |
| H  | -1.620245000 | 5.076423000  | -0.148202000  |
| C  | -0.577480000 | 3.065071000  | -0.134639000  |
| C  | 0.780224000  | 3.401421000  | -0.035996000  |
| C  | 1.874931000  | 2.528324000  | 0.035111000   |
| C  | 3.276467000  | 2.927955000  | 0.089104000   |
| H  | 3.628693000  | 3.951763000  | 0.090869000   |
| C  | 4.024508000  | 1.779104000  | 0.123862000   |
| H  | 5.102803000  | 1.687453000  | 0.156748000   |
| C  | 3.092440000  | 0.657562000  | 0.089430000   |
| C  | 3.449631000  | -0.698139000 | 0.074197000   |
| H  | 4.513692000  | -0.911804000 | 0.150123000   |
| H  | 1.014802000  | 4.463581000  | -0.019636000  |
| H  | -0.849308000 | -4.432639000 | -0.185992000  |
| H  | -4.347124000 | 0.939763000  | -0.330741000  |
| O  | 0.204641000  | 0.097089000  | -2.076717000  |
| O  | -0.102774000 | -0.055261000 | 1.681468000   |
| H  | 0.365195000  | 0.707514000  | 2.087032000   |
| H  | 0.589257000  | -0.741463000 | -2.408319000  |
| C  | -1.875231000 | -0.350090000 | 3.040919000   |
| H  | -2.000117000 | -1.312395000 | 2.565018000   |
| H  | -2.358369000 | 0.516923000  | 2.610117000   |
| H  | -1.338928000 | -0.273125000 | 3.980285000   |

**1<sup>-3</sup>ts<sub>(is)</sub>**

|    |              |              |              |
|----|--------------|--------------|--------------|
| Fe | -0.006138000 | 0.070203000  | -0.165643000 |
| N  | 2.118032000  | 0.367270000  | -0.128187000 |
| N  | 0.253509000  | -1.887963000 | -0.281628000 |
| N  | -2.158799000 | -0.216559000 | -0.005617000 |
| N  | -0.294552000 | 2.046810000  | -0.054310000 |
| C  | 2.758629000  | 1.572129000  | -0.058221000 |

|   |              |              |              |
|---|--------------|--------------|--------------|
| C | 4.202183000  | 1.348045000  | -0.078723000 |
| H | 4.957678000  | 2.122552000  | -0.035785000 |
| C | 4.389686000  | -0.009018000 | -0.166106000 |
| H | 5.326811000  | -0.549917000 | -0.207087000 |
| C | 3.060748000  | -0.615954000 | -0.199811000 |
| C | 2.746546000  | -1.976231000 | -0.294599000 |
| C | 1.469941000  | -2.545276000 | -0.327463000 |
| C | 1.227010000  | -3.979106000 | -0.370519000 |
| H | 2.005256000  | -4.729975000 | -0.411099000 |
| C | -0.127569000 | -4.164278000 | -0.341390000 |
| H | -0.677207000 | -5.096500000 | -0.353909000 |
| C | -0.744290000 | -2.847699000 | -0.278328000 |
| C | -2.125804000 | -2.643976000 | -0.205872000 |
| C | -2.798726000 | -1.420930000 | -0.107252000 |
| C | -4.239831000 | -1.194939000 | -0.134471000 |
| H | -4.993818000 | -1.968571000 | -0.209078000 |
| C | -4.431048000 | 0.164410000  | -0.070987000 |
| H | -5.369221000 | 0.704947000  | -0.083426000 |
| C | -3.106648000 | 0.772365000  | -0.002683000 |
| C | -2.791532000 | 2.134599000  | 0.026162000  |
| C | -1.514182000 | 2.706295000  | 0.019353000  |
| C | -1.268009000 | 4.136336000  | 0.114891000  |
| H | -2.045122000 | 4.886380000  | 0.185171000  |
| C | 0.088122000  | 4.319174000  | 0.111285000  |
| H | 0.638656000  | 5.248714000  | 0.177115000  |
| C | 0.705070000  | 3.006735000  | 0.010198000  |
| C | 2.088142000  | 2.796888000  | 0.002706000  |
| H | 2.702480000  | 3.692787000  | 0.057553000  |
| H | -3.623881000 | 2.833905000  | 0.057125000  |
| H | 3.579365000  | -2.674091000 | -0.338579000 |
| H | -2.739550000 | -3.540911000 | -0.247070000 |
| O | -0.095308000 | 0.163242000  | -2.032283000 |
| O | 0.035823000  | 0.030785000  | 1.747919000  |
| H | -0.896062000 | 0.009053000  | 2.056028000  |
| H | -0.240478000 | 1.089213000  | -2.319082000 |
| C | 0.555634000  | -1.866195000 | 2.843384000  |
| H | 1.524090000  | -1.833828000 | 2.365813000  |
| H | -0.231444000 | -2.460278000 | 2.396062000  |
| H | 0.426159000  | -1.438140000 | 3.830753000  |

**1<sup>-3</sup>ts<sub>(is)</sub>**

|    |              |              |              |
|----|--------------|--------------|--------------|
| Fe | -0.087868000 | 0.024684000  | -0.165720000 |
| N  | 1.926894000  | 0.251727000  | -0.272682000 |
| N  | 0.112035000  | -1.996956000 | -0.152666000 |
| N  | -2.088382000 | -0.209410000 | 0.005308000  |
| N  | -0.275434000 | 2.033484000  | -0.107948000 |
| C  | 2.853512000  | -0.766754000 | -0.330458000 |
| C  | 4.194160000  | -0.213220000 | -0.322533000 |
| H  | 5.100153000  | -0.803753000 | -0.357624000 |
| C  | 4.065469000  | 1.148802000  | -0.251490000 |
| H  | 4.844189000  | 1.899593000  | -0.221991000 |
| C  | 2.647419000  | 1.434281000  | -0.216330000 |
| C  | 2.092920000  | 2.704939000  | -0.147450000 |
| H  | 2.776357000  | 3.549210000  | -0.124067000 |
| C  | 0.733054000  | 2.981181000  | -0.105542000 |
| C  | 0.160020000  | 4.310527000  | -0.049821000 |
| H  | 0.736496000  | 5.226291000  | -0.036282000 |
| C  | -1.199248000 | 4.157217000  | -0.016816000 |
| H  | -1.963943000 | 4.921330000  | 0.029852000  |
| C  | -1.465340000 | 2.730574000  | -0.046833000 |
| C  | -2.735309000 | 2.169333000  | 0.004443000  |
| H  | -3.578439000 | 2.853410000  | 0.042658000  |
| C  | -3.019290000 | 0.809894000  | 0.035472000  |
| C  | -4.358569000 | 0.252932000  | 0.097338000  |



|   |              |              |              |
|---|--------------|--------------|--------------|
| H | -5.265519000 | 0.841924000  | 0.132892000  |
| C | -4.223956000 | -1.108933000 | 0.093190000  |
| H | -4.998936000 | -1.863563000 | 0.126977000  |
| C | -2.805387000 | -1.392931000 | 0.027770000  |
| C | -2.251589000 | -2.666268000 | -0.003319000 |
| H | -2.935412000 | -3.509953000 | 0.029738000  |
| C | -0.895402000 | -2.945298000 | -0.089596000 |
| C | -0.323555000 | -4.274671000 | -0.146177000 |
| H | -0.897583000 | -5.191546000 | -0.115515000 |
| C | 1.032478000  | -4.119455000 | -0.252232000 |
| H | 1.795555000  | -4.883467000 | -0.322744000 |
| C | 1.296943000  | -2.691668000 | -0.257270000 |
| C | 2.567064000  | -2.128892000 | -0.340942000 |
| H | 3.409712000  | -2.812162000 | -0.396246000 |
| O | 0.022738000  | 0.018747000  | 1.775680000  |
| H | -0.508928000 | -0.744705000 | 2.091559000  |
| O | -0.220569000 | 0.002081000  | -2.018814000 |
| H | 0.378587000  | 0.697351000  | -2.368007000 |
| C | 1.873002000  | -0.428875000 | 2.806830000  |
| H | 2.308727000  | 0.481938000  | 2.421685000  |
| H | 1.460756000  | -0.441971000 | 3.809680000  |
| H | 2.049280000  | -1.356565000 | 2.277719000  |

### 1-<sup>1</sup>ts<sub>(1s)</sub>

|    |              |              |              |
|----|--------------|--------------|--------------|
| Fe | -0.079100000 | 0.012794000  | -0.143911000 |
| N  | 1.822511000  | 0.678849000  | -0.245711000 |
| N  | 0.558557000  | -1.905721000 | -0.154611000 |
| N  | -1.985610000 | -0.659461000 | -0.002811000 |
| N  | -0.715457000 | 1.931509000  | -0.102911000 |
| C  | 2.952816000  | -0.105700000 | -0.343811000 |
| C  | 4.138204000  | 0.732059000  | -0.342211000 |
| H  | 5.151754000  | 0.358595000  | -0.405011000 |
| C  | 3.711130000  | 2.027002000  | -0.235611000 |
| H  | 4.302909000  | 2.932281000  | -0.199511000 |
| C  | 2.262536000  | 1.988708000  | -0.178711000 |
| C  | 1.443486000  | 3.106198000  | -0.096111000 |
| H  | 1.925456000  | 4.079163000  | -0.058011000 |
| C  | 0.054890000  | 3.076612000  | -0.070411000 |
| C  | -0.799567000 | 4.248298000  | -0.011311000 |
| H  | -0.440504000 | 5.268646000  | 0.021889000  |
| C  | -2.090207000 | 3.797325000  | -0.006811000 |
| H  | -3.006284000 | 4.371902000  | 0.033989000  |
| C  | -2.030812000 | 2.346433000  | -0.054911000 |
| C  | -3.143001000 | 1.515284000  | -0.022111000 |
| H  | -4.117865000 | 1.994553000  | 0.004989000  |
| C  | -3.119315000 | 0.127587000  | 0.009489000  |
| C  | -4.303903000 | -0.712272000 | 0.066789000  |
| H  | -5.319253000 | -0.338808000 | 0.088289000  |
| C  | -3.870629000 | -2.008714000 | 0.083989000  |
| H  | -4.458508000 | -2.916592000 | 0.120489000  |
| C  | -2.420635000 | -1.968619000 | 0.031089000  |
| C  | -1.595285000 | -3.086009000 | 0.007389000  |
| H  | -2.071854000 | -4.061673000 | 0.043889000  |
| C  | -0.211389000 | -3.053024000 | -0.090011000 |
| C  | 0.639268000  | -4.225710000 | -0.170211000 |
| H  | 0.281004000  | -5.246358000 | -0.140711000 |
| C  | 1.923807000  | -3.775838000 | -0.299211000 |
| H  | 2.834985000  | -4.351816000 | -0.393011000 |
| C  | 1.865713000  | -2.324245000 | -0.291011000 |
| C  | 2.975502000  | -1.493897000 | -0.387211000 |
| H  | 3.947466000  | -1.971967000 | -0.471711000 |
| O  | -0.029407000 | 0.067601000  | 1.768089000  |
| H  | -0.405294000 | -0.778650000 | 2.095789000  |
| O  | -0.232495000 | -0.020826000 | -2.013711000 |

|   |             |              |              |
|---|-------------|--------------|--------------|
| H | 0.042686000 | 0.862110000  | -2.343211000 |
| C | 1.918339000 | -0.275638000 | 2.798589000  |
| H | 2.265011000 | 0.677308000  | 2.426089000  |
| H | 1.506548000 | -0.343794000 | 3.799489000  |
| H | 2.147859000 | -1.173008000 | 2.239289000  |

### 1-<sup>5</sup>P<sub>(hs)</sub>

|    |              |              |              |
|----|--------------|--------------|--------------|
| Fe | 0.100195000  | 0.046035000  | -0.755775000 |
| N  | -1.398667000 | -1.421408000 | -0.224078000 |
| N  | -1.391390000 | 1.480989000  | -0.072781000 |
| N  | 1.526132000  | 1.471039000  | -0.010320000 |
| N  | 1.519515000  | -1.443229000 | -0.089731000 |
| C  | -1.196433000 | -2.784920000 | -0.156009000 |
| C  | -2.482782000 | -3.463583000 | -0.087942000 |
| H  | -2.615003000 | -4.536152000 | -0.024343000 |
| C  | -3.448992000 | -2.491499000 | -0.104664000 |
| H  | -4.523141000 | -2.615781000 | -0.054655000 |
| C  | -2.761015000 | -1.210634000 | -0.180847000 |
| C  | -3.386274000 | 0.040585000  | -0.177033000 |
| C  | -2.758920000 | 1.287049000  | -0.137476000 |
| C  | -3.431131000 | 2.576108000  | -0.127200000 |
| H  | -4.503859000 | 2.715709000  | -0.163561000 |
| C  | -2.455628000 | 3.536739000  | -0.059057000 |
| H  | -2.578861000 | 4.611701000  | -0.030544000 |
| C  | -1.176500000 | 2.845472000  | -0.025968000 |
| C  | 0.074616000  | 3.460808000  | 0.050883000  |
| C  | 1.321518000  | 2.829149000  | 0.079287000  |
| C  | 2.604127000  | 3.506424000  | 0.227340000  |
| H  | 2.732366000  | 4.577021000  | 0.322059000  |
| C  | 3.568628000  | 2.534593000  | 0.235171000  |
| H  | 4.639644000  | 2.655869000  | 0.334856000  |
| C  | 2.883122000  | 1.255885000  | 0.090206000  |
| C  | 3.504444000  | 0.004420000  | 0.086138000  |
| C  | 2.877919000  | -1.243704000 | 0.021158000  |
| C  | 3.553405000  | -2.532459000 | 0.098662000  |
| H  | 4.623440000  | -2.667339000 | 0.191955000  |
| C  | 2.581057000  | -3.496741000 | 0.044313000  |
| H  | 2.702886000  | -4.571692000 | 0.084469000  |
| C  | 1.304092000  | -2.804330000 | -0.069997000 |
| C  | 0.048900000  | -3.418362000 | -0.111129000 |
| H  | 0.038100000  | -4.505057000 | -0.068607000 |
| H  | 4.588454000  | -0.00008000  | 0.172978000  |
| H  | -4.473477000 | 0.041413000  | -0.176425000 |
| H  | 0.078454000  | 4.546636000  | 0.106930000  |
| O  | 0.180950000  | 0.156020000  | -2.655485000 |
| O  | -0.929992000 | 0.446382000  | 2.656250000  |
| H  | -1.002833000 | 0.698631000  | 1.705009000  |
| C  | -0.596723000 | -0.959339000 | 2.769741000  |
| H  | 0.231093000  | -1.238988000 | 2.106283000  |
| H  | -0.300758000 | -1.126796000 | 3.812014000  |
| H  | -1.454779000 | -1.607103000 | 2.533028000  |
| H  | -0.348182000 | -0.435892000 | -3.222522000 |

### 1-<sup>3</sup>P<sub>(is)</sub>

|    |              |              |              |
|----|--------------|--------------|--------------|
| Fe | 0.069042000  | 0.084324000  | -0.410934000 |
| N  | -0.379293000 | -1.855361000 | -0.338828000 |
| N  | -1.933068000 | 0.507727000  | -0.081017000 |
| N  | 0.495133000  | 1.996978000  | -0.104813000 |
| N  | 2.037875000  | -0.387579000 | -0.031473000 |
| C  | 0.518215000  | -2.929346000 | -0.294313000 |
| C  | -0.209454000 | -4.184420000 | -0.330701000 |
| H  | 0.262104000  | -5.158021000 | -0.307943000 |
| C  | -1.537528000 | -3.883280000 | -0.370456000 |

|   |              |              |              |
|---|--------------|--------------|--------------|
| H | -2.383571000 | -4.557535000 | -0.385647000 |
| C | -1.653494000 | -2.436282000 | -0.357122000 |
| C | -2.856196000 | -1.766125000 | -0.303121000 |
| C | -2.997962000 | -0.382681000 | -0.179827000 |
| C | -4.239824000 | 0.329843000  | -0.157369000 |
| H | -5.216276000 | -0.133017000 | -0.209880000 |
| C | -3.931575000 | 1.673078000  | -0.070845000 |
| H | -4.608734000 | 2.516334000  | -0.042165000 |
| C | -2.503227000 | 1.774888000  | -0.041909000 |
| C | -1.778096000 | 2.968009000  | -0.020395000 |
| C | -0.404565000 | 3.061630000  | -0.045770000 |
| C | 0.320542000  | 4.319164000  | 0.036493000  |
| H | -0.154941000 | 5.289376000  | 0.092246000  |
| C | 1.647862000  | 4.019622000  | 0.047953000  |
| H | 2.492954000  | 4.691829000  | 0.115341000  |
| C | 1.763649000  | 2.572167000  | -0.024575000 |
| C | 2.960276000  | 1.894713000  | 0.040884000  |
| C | 3.094118000  | 0.504008000  | 0.052616000  |
| C | 4.338379000  | -0.208048000 | 0.128275000  |
| H | 5.311330000  | 0.258994000  | 0.205031000  |
| C | 4.034811000  | -1.552648000 | 0.072464000  |
| H | 4.711516000  | -2.396727000 | 0.093937000  |
| C | 2.607564000  | -1.651779000 | -0.039917000 |
| C | 1.886783000  | -2.841486000 | -0.166364000 |
| H | 2.448631000  | -3.770939000 | -0.147684000 |
| H | 3.869555000  | 2.484955000  | 0.107355000  |
| H | -3.764155000 | -2.360886000 | -0.338177000 |
| H | -2.343498000 | 3.894209000  | 0.022740000  |
| O | 0.118568000  | 0.234882000  | -2.329218000 |
| O | -1.075140000 | -0.139047000 | 2.763845000  |
| H | -1.355870000 | 0.068461000  | 1.843200000  |
| C | -0.212517000 | -1.308711000 | 2.766331000  |
| H | -0.736648000 | -2.207695000 | 2.410359000  |
| H | 0.094684000  | -1.457509000 | 3.806631000  |
| H | 0.679095000  | -1.164173000 | 2.143033000  |
| H | -0.079781000 | -0.623020000 | -2.762202000 |

### 1-<sup>1</sup>P<sub>(ls)</sub>

|    |              |              |              |
|----|--------------|--------------|--------------|
| Fe | -0.054701000 | 0.016561000  | -0.185698000 |
| N  | 1.140518000  | -1.616473000 | -0.151296000 |
| N  | 1.562631000  | 1.207807000  | -0.147228000 |
| N  | -1.671390000 | -1.191796000 | -0.036725000 |
| N  | -1.245306000 | 1.633360000  | -0.099036000 |
| C  | 0.749880000  | -2.945259000 | -0.128438000 |
| C  | 1.584105000  | 2.593546000  | -0.101907000 |
| C  | 2.521360000  | -1.630605000 | -0.257320000 |
| C  | 2.887083000  | 0.811727000  | -0.230893000 |
| C  | -1.689221000 | -2.578839000 | -0.023812000 |
| C  | -0.854964000 | 2.962862000  | -0.062323000 |
| C  | -2.998933000 | -0.796339000 | -0.035600000 |
| C  | -2.629632000 | 1.645078000  | -0.074047000 |
| C  | 1.911901000  | -3.811101000 | -0.203031000 |
| C  | 2.953515000  | 3.074538000  | -0.132307000 |
| C  | 3.008352000  | -2.997425000 | -0.286690000 |
| C  | 3.759171000  | 1.972754000  | -0.215412000 |
| C  | -3.057879000 | -3.061086000 | 0.009866000  |
| C  | -2.020212000 | 3.826552000  | -0.021723000 |
| C  | -3.867487000 | -1.959083000 | -0.002225000 |
| C  | -3.118463000 | 3.011357000  | -0.032053000 |
| H  | 1.872504000  | -4.892860000 | -0.203874000 |
| H  | 3.238270000  | 4.118587000  | -0.104995000 |
| H  | 4.051228000  | -3.276227000 | -0.366565000 |
| H  | 4.839574000  | 1.928821000  | -0.266552000 |
| H  | -3.340392000 | -4.105934000 | 0.027153000  |

|   |              |              |              |
|---|--------------|--------------|--------------|
| H | -1.982217000 | 4.907931000  | 0.009169000  |
| H | -4.949103000 | -1.916746000 | 0.005742000  |
| H | -4.164710000 | 3.287996000  | -0.008884000 |
| C | -0.563898000 | -3.392036000 | -0.054886000 |
| C | 0.460870000  | 3.408238000  | -0.059866000 |
| C | -3.442408000 | 0.518377000  | -0.061196000 |
| C | 3.330671000  | -0.502337000 | -0.295673000 |
| H | -0.724922000 | -4.466988000 | -0.043224000 |
| H | 0.624020000  | 4.482646000  | -0.031142000 |
| H | -4.517233000 | 0.681134000  | -0.050940000 |
| H | 4.403600000  | -0.661699000 | -0.368179000 |
| O | -0.074183000 | -0.096101000 | 1.986642000  |
| H | -0.339318000 | 0.857382000  | -2.387944000 |
| H | -0.469105000 | -0.990960000 | 2.032434000  |
| O | -0.081183000 | -0.045512000 | -2.100133000 |
| C | 1.236019000  | -0.054037000 | 2.634772000  |
| H | 1.135468000  | -0.262328000 | 3.708811000  |
| H | 1.922189000  | -0.759600000 | 2.157747000  |
| H | 1.601130000  | 0.959600000  | 2.475915000  |

### [(OH)(Por<sup>•+</sup>)Fe<sup>IV</sup>=O] (2)

#### <sup>6</sup>2<sub>(hs)</sub> or 2-<sup>6</sup>R<sub>(hs)</sub>

|    |              |              |              |
|----|--------------|--------------|--------------|
| Fe | 0.009194000  | -0.007580000 | -0.103324000 |
| N  | 1.955014000  | 0.735383000  | -0.015622000 |
| N  | 0.741319000  | -1.943229000 | -0.041669000 |
| N  | -0.735663000 | 1.938044000  | 0.027562000  |
| N  | -1.953079000 | -0.726816000 | -0.040813000 |
| C  | 2.319876000  | 2.060622000  | 0.002269000  |
| C  | -0.014829000 | -3.089057000 | -0.012843000 |
| C  | 3.102646000  | -0.015744000 | -0.004687000 |
| C  | 2.063714000  | -2.309914000 | -0.006779000 |
| C  | 0.019931000  | 3.088328000  | 0.025441000  |
| C  | -2.311981000 | -2.051345000 | -0.013531000 |
| C  | -2.061556000 | 2.310288000  | 0.002337000  |
| C  | -3.107497000 | 0.021570000  | -0.022404000 |
| C  | 3.773072000  | 2.154731000  | 0.017564000  |
| C  | 0.872481000  | -4.243273000 | 0.030139000  |
| C  | 4.255821000  | 0.874158000  | 0.014772000  |
| C  | 2.153783000  | -3.762971000 | 0.034517000  |
| C  | -0.865477000 | 4.239855000  | 0.013926000  |
| C  | -3.764472000 | -2.151099000 | 0.017439000  |
| C  | -2.149385000 | 3.759956000  | -0.000992000 |
| C  | -4.255081000 | -0.873117000 | 0.010129000  |
| H  | 4.333846000  | 3.078506000  | 0.032983000  |
| H  | 0.546275000  | -5.273236000 | 0.058379000  |
| H  | 5.286917000  | 0.550386000  | 0.026291000  |
| H  | 3.076300000  | -4.324995000 | 0.067203000  |
| H  | -0.539506000 | 5.270324000  | 0.013113000  |
| H  | -4.320222000 | -3.077708000 | 0.042946000  |
| H  | -3.071134000 | 4.324070000  | -0.016181000 |
| H  | -5.287899000 | -0.555274000 | 0.030170000  |
| C  | 1.421848000  | 3.132032000  | 0.019127000  |
| C  | -1.413793000 | -3.127150000 | -0.008681000 |
| C  | -3.144432000 | 1.419527000  | -0.018905000 |
| C  | 3.141539000  | -1.416508000 | 0.002318000  |
| H  | 1.863955000  | 4.124629000  | 0.025825000  |
| H  | -1.861103000 | -4.117191000 | 0.014639000  |
| H  | -4.132096000 | 1.872371000  | -0.023972000 |
| H  | 4.130992000  | -1.864894000 | 0.026273000  |
| O  | 0.033627000  | 0.031218000  | -1.787189000 |
| H  | -0.586185000 | 0.606498000  | 2.181643000  |
| O  | -0.027323000 | -0.101896000 | 1.798935000  |

#### <sup>4</sup>2<sub>(hs)</sub> or 2-<sup>4</sup>R<sub>(hs)</sub>

|    |              |              |              |
|----|--------------|--------------|--------------|
| Fe | -0.014977000 | 0.006651000  | -0.119273000 |
| N  | -1.677666000 | -1.239952000 | -0.034554000 |

|   |              |              |              |
|---|--------------|--------------|--------------|
| N | -1.247981000 | 1.668345000  | -0.030500000 |
| N | 1.241651000  | -1.659506000 | 0.025460000  |
| N | 1.675803000  | -1.230464000 | -0.017816000 |
| C | -1.663593000 | -2.612327000 | 0.006453000  |
| C | -0.835636000 | 2.976280000  | -0.004591000 |
| C | -2.987348000 | -0.832755000 | -0.007058000 |
| C | -2.620055000 | 1.658382000  | -0.016613000 |
| C | 0.829092000  | -2.972864000 | 0.014294000  |
| C | 1.656984000  | 2.604505000  | 0.010501000  |
| C | 2.619425000  | -1.656076000 | -0.002883000 |
| C | 2.991581000  | 0.830300000  | -0.006843000 |
| C | -3.034111000 | -3.102629000 | 0.049644000  |
| C | -2.004847000 | 3.844119000  | 0.018744000  |
| C | -3.850829000 | -2.004443000 | 0.041992000  |
| C | -3.105864000 | 3.030888000  | 0.011435000  |
| C | 1.995972000  | -3.839040000 | -0.005699000 |
| C | 3.025576000  | 3.099362000  | 0.038346000  |
| C | 3.099531000  | -3.027369000 | -0.017008000 |
| C | 3.848610000  | 2.005422000  | 0.026026000  |
| H | -3.318333000 | -4.144675000 | 0.086421000  |
| H | -1.973434000 | 4.924148000  | 0.042050000  |
| H | -4.930850000 | -1.976673000 | 0.070942000  |
| H | -4.147499000 | 3.318479000  | 0.027860000  |
| H | 1.963281000  | -4.919310000 | -0.013512000 |
| H | 3.305049000  | 4.143066000  | 0.064082000  |
| H | 4.140362000  | -3.317937000 | -0.035499000 |
| H | 4.929065000  | 1.983733000  | 0.040675000  |
| C | -0.506051000 | -3.398081000 | 0.015147000  |
| C | 0.500516000  | 3.394654000  | 0.011588000  |
| C | 3.415133000  | -0.503594000 | -0.013861000 |
| C | -3.410844000 | 0.502699000  | -0.009003000 |
| H | -0.660420000 | -4.473555000 | 0.025902000  |
| H | 0.661337000  | 4.469031000  | 0.033911000  |
| H | 4.489433000  | -0.665102000 | -0.021930000 |
| H | -4.485561000 | 0.660983000  | 0.011874000  |
| O | 0.012637000  | -0.011925000 | -1.801326000 |
| H | 0.784126000  | -0.387066000 | 2.161856000  |
| O | -0.023795000 | 0.040914000  | 1.806911000  |

$42_{(is)}$  or  $2\text{-}^4\mathbf{R}_{(is)}$

|    |              |              |              |
|----|--------------|--------------|--------------|
| Fe | -0.017789000 | 0.004226000  | -0.083052000 |
| N  | -1.251200000 | -1.584320000 | -0.026557000 |
| N  | -1.600991000 | 1.238949000  | 0.009878000  |
| N  | 1.591828000  | -1.232738000 | -0.044557000 |
| N  | 1.236326000  | 1.593362000  | 0.022365000  |
| C  | -0.885925000 | -2.913987000 | -0.000263000 |
| C  | -1.575607000 | 2.621182000  | 0.040315000  |
| C  | -2.630155000 | -1.565624000 | -0.018679000 |
| C  | -2.933998000 | 0.882243000  | -0.020493000 |
| C  | 1.565128000  | -2.613065000 | -0.003394000 |
| C  | 0.874908000  | 2.926077000  | 0.057196000  |
| C  | 2.928514000  | -0.874229000 | -0.058817000 |
| C  | 2.617877000  | 1.575074000  | -0.041766000 |
| C  | -2.067255000 | -3.754172000 | 0.020002000  |
| C  | -2.927274000 | 3.142913000  | 0.025186000  |
| C  | -3.147172000 | -2.919464000 | 0.007942000  |
| C  | -3.767190000 | 2.067604000  | -0.015300000 |
| C  | 2.916741000  | -3.134418000 | 0.012247000  |
| C  | 2.054692000  | 3.763101000  | 0.031569000  |
| C  | 3.759235000  | -2.060324000 | -0.024939000 |
| C  | 3.133976000  | 2.926538000  | -0.034477000 |
| H  | -2.049657000 | -4.834297000 | 0.042399000  |
| H  | -3.177362000 | 4.193945000  | 0.042519000  |
| H  | -4.197195000 | -3.174006000 | 0.019402000  |
| H  | -4.847423000 | 2.056101000  | -0.035830000 |
| H  | 3.166211000  | -4.185193000 | 0.046541000  |
| H  | 2.040190000  | 4.843302000  | 0.053930000  |
| H  | 4.839737000  | -2.050924000 | -0.025032000 |
| H  | 4.183140000  | 3.182028000  | -0.074525000 |
| C  | 0.416936000  | -3.390819000 | 0.004197000  |
| C  | -0.430441000 | 3.400806000  | 0.079122000  |
| C  | 3.402135000  | 0.428603000  | -0.084795000 |
| C  | -3.412616000 | -0.420224000 | -0.027016000 |
| H  | 0.549252000  | -4.467839000 | 0.021869000  |

|   |              |              |              |
|---|--------------|--------------|--------------|
| H | -0.564698000 | 4.477379000  | 0.106614000  |
| H | 4.478128000  | 0.565348000  | -0.119492000 |
| H | -4.489560000 | -0.553448000 | -0.030447000 |
| O | -0.060067000 | 0.089899000  | -1.767647000 |
| H | 0.946755000  | 0.180031000  | 2.167959000  |
| O | 0.109842000  | -0.211896000 | 1.833711000  |

$22_{(is)}$  or  $2\text{-}^2\mathbf{R}_{(is)}$

|    |              |              |              |
|----|--------------|--------------|--------------|
| Fe | 0.025274000  | 0.013000000  | -0.108233000 |
| N  | 1.500081000  | 1.364765000  | 0.015495000  |
| N  | 1.376687000  | -1.474863000 | -0.031624000 |
| N  | -1.352151000 | 1.495473000  | 0.011726000  |
| N  | -1.481554000 | -1.348591000 | -0.012985000 |
| C  | 1.366149000  | 2.740055000  | 0.043185000  |
| C  | 1.118285000  | -2.827325000 | -0.010864000 |
| C  | 2.856463000  | 1.114849000  | 0.006008000  |
| C  | 2.752743000  | -1.347067000 | -0.026919000 |
| C  | -1.098240000 | 2.855648000  | 0.024762000  |
| C  | -1.345678000 | -2.727290000 | 0.011786000  |
| C  | -2.727201000 | 1.365824000  | -0.035716000 |
| C  | -2.846886000 | -1.097474000 | -0.025601000 |
| C  | 2.670707000  | 3.366703000  | 0.056021000  |
| C  | 2.362093000  | -3.572397000 | -0.001611000 |
| C  | 3.593934000  | 2.359874000  | 0.031479000  |
| C  | 3.373607000  | -2.656193000 | -0.012361000 |
| C  | -2.341699000 | 3.593546000  | -0.002851000 |
| C  | -2.652837000 | -3.351187000 | 0.025090000  |
| C  | -3.350177000 | 2.671325000  | -0.042542000 |
| C  | -3.577663000 | -2.347496000 | 0.000332000  |
| H  | 2.836783000  | 4.434126000  | 0.079566000  |
| H  | 2.428481000  | -4.650739000 | 0.014859000  |
| H  | 4.671958000  | 2.432913000  | 0.032113000  |
| H  | 4.440350000  | -2.827865000 | -0.005219000 |
| H  | -2.414615000 | 4.671611000  | 0.004379000  |
| H  | -2.819041000 | -4.418647000 | 0.047332000  |
| H  | -4.417018000 | 2.840233000  | -0.073225000 |
| H  | -4.655460000 | -2.425005000 | -0.000475000 |
| C  | 0.163136000  | 3.431416000  | 0.049828000  |
| C  | -0.142670000 | -3.409958000 | 0.004492000  |
| C  | -3.421531000 | 0.160599000  | -0.054090000 |
| C  | 3.440608000  | -0.145733000 | -0.016688000 |
| H  | 0.214161000  | 4.515289000  | 0.064564000  |
| H  | -0.186882000 | -4.494104000 | 0.016159000  |
| H  | -4.505008000 | 0.213171000  | -0.079659000 |
| H  | 4.524727000  | -0.191081000 | -0.016328000 |
| O  | -0.015221000 | 0.013470000  | -1.769247000 |
| H  | -0.983998000 | 0.146227000  | 2.154683000  |
| O  | -0.141258000 | -0.251959000 | 1.838569000  |

$22_{(ls)}$  or  $2\text{-}^2\mathbf{R}_{(ls)}$

|    |              |              |              |
|----|--------------|--------------|--------------|
| Fe | -0.017789000 | 0.004226000  | -0.083052000 |
| N  | -1.251200000 | -1.584320000 | -0.026557000 |
| N  | -1.600991000 | 1.238949000  | 0.009878000  |
| N  | 1.591828000  | -1.232738000 | -0.044557000 |
| N  | 1.236326000  | 1.593362000  | 0.022365000  |
| C  | -0.885925000 | -2.913987000 | -0.000263000 |
| C  | -1.575607000 | 2.621182000  | 0.040315000  |
| C  | -2.630155000 | -1.565624000 | -0.018679000 |
| C  | -2.933998000 | 0.882243000  | -0.020493000 |
| C  | 1.565128000  | -2.613065000 | -0.003394000 |
| C  | 0.874908000  | 2.926077000  | 0.057196000  |
| C  | 2.928514000  | -0.874229000 | -0.058817000 |
| C  | 2.617877000  | 1.575074000  | -0.041766000 |
| C  | -2.067255000 | -3.754172000 | 0.020002000  |
| C  | -2.927274000 | 3.142913000  | 0.025186000  |
| C  | -3.147172000 | -2.919464000 | 0.007942000  |
| C  | -3.767190000 | 2.067604000  | -0.015300000 |
| C  | 2.916741000  | -3.134418000 | 0.012247000  |
| C  | 2.054692000  | 3.763101000  | 0.031569000  |
| C  | 3.759235000  | -2.060324000 | -0.024939000 |
| C  | 3.133976000  | 2.926538000  | -0.034477000 |
| H  | -2.049657000 | -4.834297000 | 0.042399000  |
| H  | -3.177362000 | 4.193945000  | 0.042519000  |
| H  | -4.197195000 | -3.174006000 | 0.019402000  |
| H  | -4.847423000 | 2.056101000  | -0.035830000 |
| H  | 3.166211000  | -4.185193000 | 0.046541000  |
| H  | 2.040190000  | 4.843302000  | 0.053930000  |
| H  | 4.839737000  | -2.050924000 | -0.025032000 |
| H  | 4.183140000  | 3.182028000  | -0.074525000 |
| C  | 0.416936000  | -3.390819000 | 0.004197000  |
| C  | -0.430441000 | 3.400806000  | 0.079122000  |
| C  | 3.402135000  | 0.428603000  | -0.084795000 |
| C  | -3.412616000 | -0.420224000 | -0.027016000 |
| H  | 0.549252000  | -4.467839000 | 0.021869000  |

|   |              |              |              |
|---|--------------|--------------|--------------|
| H | -3.177362000 | 4.193945000  | 0.042519000  |
| H | -4.197195000 | -3.174006000 | 0.019402000  |
| H | -4.847423000 | 2.056101000  | -0.035830000 |
| H | 3.166211000  | -4.185193000 | 0.046541000  |
| H | 2.040190000  | 4.843302000  | 0.053930000  |
| H | 4.839737000  | -2.050924000 | -0.025032000 |
| H | 4.183140000  | 3.182028000  | -0.074525000 |
| C | 0.416936000  | -3.390819000 | 0.004197000  |
| C | -0.430441000 | 3.400806000  | 0.079122000  |
| C | 3.402135000  | 0.428603000  | -0.084795000 |
| C | -3.412616000 | -0.420224000 | -0.027016000 |
| H | 0.549252000  | -4.467839000 | 0.021869000  |
| H | -0.564698000 | 4.477379000  | 0.106614000  |
| H | 4.478128000  | 0.565348000  | -0.119492000 |
| H | -4.489560000 | -0.553448000 | -0.030447000 |
| O | -0.060067000 | 0.089899000  | -1.767647000 |
| H | 0.946755000  | 0.180031000  | 2.167959000  |
| O | 0.109842000  | -0.211896000 | 1.833711000  |

## 2-<sup>6</sup>ts1<sub>(hs)</sub>

|    |              |              |              |
|----|--------------|--------------|--------------|
| Fe | -0.131938000 | 0.019425000  | -0.131155000 |
| N  | -0.792243000 | -1.953405000 | -0.179442000 |
| N  | 1.845187000  | -0.681928000 | -0.201604000 |
| N  | -2.049305000 | 0.684710000  | -0.000144000 |
| N  | 0.580982000  | 1.969061000  | -0.166708000 |
| C  | -2.111043000 | -2.348885000 | -0.092756000 |
| C  | 2.971622000  | 0.104516000  | -0.330595000 |
| C  | -0.004586000 | -3.089555000 | -0.129197000 |
| C  | 2.244497000  | -2.002421000 | -0.197083000 |
| C  | -3.185925000 | -0.098582000 | 0.035509000  |
| C  | 1.896345000  | 2.361208000  | -0.288629000 |
| C  | -2.439602000 | 2.009035000  | 0.076278000  |
| C  | -0.196849000 | 3.098549000  | -0.088488000 |
| C  | -2.161451000 | -3.798770000 | -0.027407000 |
| C  | 4.136972000  | -0.758383000 | -0.384802000 |
| C  | -0.869333000 | -4.252870000 | -0.046183000 |
| C  | 3.691752000  | -2.051984000 | -0.297720000 |
| C  | -4.34597000  | 0.769718000  | 0.145478000  |
| C  | 1.950786000  | 3.814805000  | -0.290798000 |
| C  | -3.888464000 | 2.059356000  | 0.172641000  |
| C  | 0.664903000  | 4.267831000  | -0.165553000 |
| H  | -3.070788000 | -4.379270000 | 0.039406000  |
| H  | 5.155680000  | -0.409457000 | -0.479260000 |
| H  | -0.521260000 | -5.275212000 | 0.000233000  |
| H  | 4.276671000  | -2.960862000 | -0.313824000 |
| H  | -5.368492000 | 0.423751000  | 0.192973000  |
| H  | 2.857647000  | 4.396871000  | -0.375961000 |
| H  | -4.466440000 | 2.969751000  | 0.245981000  |
| H  | 0.318669000  | 5.291163000  | -0.130371000 |
| C  | -3.211056000 | -1.490997000 | -0.019742000 |
| C  | 2.991379000  | 1.500982000  | -0.368423000 |
| C  | -1.589270000 | 3.111860000  | 0.035354000  |
| C  | 1.389703000  | -3.106920000 | -0.143862000 |
| H  | -4.188348000 | -1.960537000 | 0.032600000  |
| H  | 3.967616000  | 1.966584000  | -0.463099000 |
| H  | -2.061326000 | 4.087789000  | 0.091788000  |
| H  | 1.862600000  | -4.083918000 | -0.123751000 |
| O  | -0.080558000 | -0.010877000 | 1.656184000  |
| H  | 0.971767000  | -0.072224000 | 2.153092000  |
| O  | -0.071733000 | 0.043349000  | -1.957783000 |
| H  | -0.016262000 | -0.863569000 | -2.330991000 |
| H  | 2.621879000  | 0.852887000  | 2.431171000  |
| H  | 1.881074000  | -0.061180000 | 3.851907000  |
| H  | 2.665257000  | -0.982815000 | 2.459935000  |
| C  | 2.176955000  | -0.070767000 | 2.802024000  |

## 2-<sup>4</sup>ts1<sub>(hs)</sub>

|    |              |              |              |
|----|--------------|--------------|--------------|
| Fe | -0.082084000 | 0.022755000  | -0.123765000 |
| N  | -1.101273000 | -1.807246000 | -0.174107000 |
| N  | 1.719206000  | -0.980561000 | -0.185629000 |
| N  | -1.906929000 | 1.004874000  | 0.004242000  |
| N  | 0.920839000  | 1.812629000  | -0.160123000 |

|   |              |              |              |
|---|--------------|--------------|--------------|
| C | -2.469348000 | -1.975258000 | -0.079272000 |
| C | 2.965555000  | -0.403465000 | -0.334718000 |
| C | -0.513048000 | -3.053978000 | -0.109132000 |
| C | 1.884693000  | -2.354436000 | -0.172113000 |
| C | -3.155158000 | 0.423004000  | 0.031412000  |
| C | 2.280922000  | 1.991831000  | -0.309279000 |
| C | -2.067024000 | 2.369833000  | 0.066417000  |
| C | 0.329691000  | 3.059542000  | -0.096465000 |
| C | -2.757359000 | -3.395984000 | 0.001016000  |
| C | 3.962345000  | -1.455542000 | -0.385868000 |
| C | -1.557352000 | -4.057532000 | -0.013293000 |
| C | 3.301037000  | -2.651119000 | -0.278765000 |
| C | -4.156023000 | 1.474468000  | 0.125220000  |
| C | 2.563357000  | 3.415919000  | -0.335341000 |
| C | -3.488317000 | 2.668869000  | 0.148537000  |
| C | 1.367542000  | 4.069934000  | -0.200985000 |
| H | -3.749820000 | -3.817887000 | 0.074788000  |
| H | 5.024920000  | -1.289085000 | -0.493922000 |
| H | -1.382932000 | -5.122738000 | 0.044478000  |
| H | 3.719859000  | -3.647577000 | -0.288839000 |
| H | -5.222839000 | 1.305327000  | 0.166108000  |
| H | 3.549526000  | 3.845088000  | -0.443320000 |
| H | -3.904022000 | 3.664652000  | 0.211025000  |
| H | 1.189831000  | 5.135932000  | -0.180396000 |
| C | -3.411696000 | -0.947446000 | -0.012895000 |
| C | 3.222816000  | 0.966532000  | -0.393610000 |
| C | -1.036718000 | 3.310681000  | 0.024565000  |
| C | 0.861203000  | -3.300184000 | -0.117149000 |
| H | -4.453230000 | -1.248521000 | 0.041015000  |
| H | 4.260551000  | 1.263383000  | -0.506993000 |
| H | -1.333155000 | 4.354064000  | 0.068259000  |
| H | 1.166911000  | -4.341492000 | -0.090548000 |
| O | -0.138684000 | -0.052171000 | 1.659044000  |
| H | 0.901727000  | -0.140304000 | 2.185392000  |
| O | -0.210799000 | 0.056830000  | -1.943847000 |
| H | -0.696039000 | -0.720759000 | -2.295873000 |
| H | 2.583734000  | 0.746810000  | 2.299502000  |
| H | 1.854708000  | 0.008599000  | 3.825229000  |
| H | 2.547486000  | -1.077755000 | 2.503141000  |
| C | 2.114539000  | -0.114759000 | 2.772815000  |

## 2-<sup>4</sup>ts1<sub>(is)</sub> ( $\pi$ -pathway)

|    |              |              |              |
|----|--------------|--------------|--------------|
| Fe | -0.121676000 | 0.012260000  | -0.125235000 |
| N  | -1.149124000 | -1.713152000 | -0.113532000 |
| N  | 1.607817000  | -1.038249000 | -0.210660000 |
| N  | -1.820472000 | 1.038709000  | 0.000418000  |
| N  | 0.929484000  | 1.727368000  | -0.179701000 |
| C  | -2.524690000 | -1.852837000 | -0.143123000 |
| C  | 2.873344000  | -0.523955000 | -0.434176000 |
| C  | -0.627430000 | -2.992238000 | 0.021108000  |
| C  | 1.756105000  | -2.405839000 | -0.068407000 |
| C  | -3.104729000 | 0.528320000  | -0.050403000 |
| C  | 2.284660000  | 1.861203000  | -0.420715000 |
| C  | -1.947461000 | 2.409595000  | 0.152670000  |
| C  | 0.427317000  | 3.001851000  | -0.027667000 |
| C  | -2.874694000 | -3.254370000 | -0.061616000 |
| C  | 3.840494000  | -1.597662000 | -0.423091000 |
| C  | -1.707050000 | -3.954484000 | 0.054734000  |
| C  | 3.154026000  | -2.756682000 | -0.181692000 |
| C  | -4.062726000 | 1.606724000  | 0.075141000  |
| C  | 2.640564000  | 3.265171000  | -0.419774000 |
| C  | -3.350081000 | 2.762908000  | 0.214831000  |
| C  | 1.497200000  | 3.968099000  | -0.163736000 |
| H  | -3.887449000 | -3.631045000 | -0.071829000 |
| H  | 4.902302000  | -1.463539000 | -0.572787000 |
| H  | -1.568409000 | -5.021957000 | 0.150326000  |
| H  | 3.539197000  | -3.763436000 | -0.104868000 |
| H  | -5.134913000 | 1.472681000  | 0.064896000  |
| H  | 3.640068000  | 3.641284000  | -0.585138000 |
| H  | -3.718942000 | 3.771559000  | 0.333831000  |
| H  | 1.367128000  | 5.037889000  | -0.084480000 |
| C  | -3.438712000 | -0.811303000 | -0.152955000 |
| C  | 3.187150000  | 0.820253000  | -0.564156000 |
| C  | -0.908452000 | 3.322561000  | 0.165578000  |

|   |              |              |              |
|---|--------------|--------------|--------------|
| C | 0.717550000  | -3.315867000 | 0.071065000  |
| H | -4.492286000 | -1.066895000 | -0.176433000 |
| H | 4.226545000  | 1.077356000  | -0.736788000 |
| H | -1.162492000 | 4.370852000  | 0.277465000  |
| H | 0.978398000  | -4.363559000 | 0.173157000  |
| O | -0.062599000 | -0.012439000 | 1.673365000  |
| H | 1.017129000  | -0.036859000 | 2.143837000  |
| O | -0.109856000 | 0.035345000  | -1.942499000 |
| H | -0.041230000 | -0.869306000 | -2.317433000 |
| H | 2.710623000  | 0.844242000  | 2.237894000  |
| H | 2.033072000  | 0.065615000  | 3.762771000  |
| H | 2.680960000  | -0.982818000 | 2.394950000  |
| C | 2.247546000  | -0.029248000 | 2.697074000  |

### 2-<sup>4</sup>ts1<sub>(is)</sub> (δ-pathway)

|    |              |              |              |
|----|--------------|--------------|--------------|
| Fe | -0.082075000 | 0.022765000  | -0.123739000 |
| N  | -1.101423000 | -1.807163000 | -0.174134000 |
| N  | 1.719122000  | -0.980699000 | -0.185639000 |
| N  | -1.906837000 | 1.005024000  | 0.004228000  |
| N  | 0.920989000  | 1.812551000  | -0.160086000 |
| C  | -2.469512000 | -1.975065000 | -0.079323000 |
| C  | 2.965516000  | -0.403706000 | -0.334749000 |
| C  | -0.513297000 | -3.053940000 | -0.109124000 |
| C  | 1.884498000  | -2.354587000 | -0.172088000 |
| C  | -3.155114000 | 0.423254000  | 0.031374000  |
| C  | 2.281078000  | 1.991644000  | -0.309329000 |
| C  | -2.066823000 | 2.369993000  | 0.066450000  |
| C  | 0.329943000  | 3.059514000  | -0.096433000 |
| C  | -2.757639000 | -3.395766000 | 0.000977000  |
| C  | 3.962221000  | -1.455865000 | -0.385880000 |
| C  | -1.557683000 | -4.057410000 | -0.013293000 |
| C  | 3.300818000  | -2.651386000 | -0.278738000 |
| C  | -4.155896000 | 1.474796000  | 0.125207000  |
| C  | 2.563624000  | 3.415708000  | -0.335435000 |
| C  | -3.488093000 | 2.669142000  | 0.148570000  |
| C  | 1.367868000  | 4.069821000  | -0.201025000 |
| H  | -3.750134000 | -3.817590000 | 0.074732000  |
| H  | 5.024809000  | -1.289496000 | -0.493946000 |
| H  | -1.383347000 | -5.122629000 | 0.044497000  |
| H  | 3.719560000  | -3.647877000 | -0.288790000 |
| H  | -5.222725000 | 1.305740000  | 0.166078000  |
| H  | 3.549820000  | 3.844797000  | -0.443476000 |
| H  | -3.903717000 | 3.664957000  | 0.211086000  |
| H  | 1.190242000  | 5.135833000  | -0.180449000 |
| C  | -3.411773000 | -0.947172000 | -0.012957000 |
| C  | 3.222886000  | 0.966269000  | -0.393675000 |
| C  | -1.036444000 | 3.310761000  | 0.024619000  |
| C  | 0.860934000  | -3.300254000 | -0.117114000 |
| H  | -4.453334000 | -1.248157000 | 0.040937000  |
| H  | 4.260641000  | 1.263034000  | -0.507097000 |
| H  | -1.332799000 | 4.354167000  | 0.068327000  |
| H  | 1.166561000  | -4.341585000 | -0.090488000 |
| O  | -0.138678000 | -0.052240000 | 1.659062000  |
| H  | 0.901728000  | -0.140377000 | 2.185426000  |
| O  | -0.210795000 | 0.056870000  | -1.943827000 |
| H  | -0.696117000 | -0.720702000 | -2.295785000 |
| H  | 2.583719000  | 0.746748000  | 2.299611000  |
| H  | 1.854633000  | 0.008512000  | 3.825296000  |
| H  | 2.547485000  | -1.077821000 | 2.503235000  |
| C  | 2.114512000  | -0.114832000 | 2.772892000  |

### 2-<sup>2</sup>ts1<sub>(is)</sub>

|    |              |              |              |
|----|--------------|--------------|--------------|
| Fe | -0.094114000 | 0.013192000  | -0.117637000 |
| N  | 0.976668000  | -1.694896000 | -0.199010000 |
| N  | 1.591738000  | 1.072570000  | -0.199835000 |
| N  | -1.795448000 | -1.074981000 | -0.031533000 |
| N  | -1.169354000 | 1.706964000  | -0.069654000 |
| C  | 0.497050000  | -2.982166000 | -0.017736000 |
| C  | 1.710007000  | 2.446744000  | -0.074994000 |
| C  | 2.337361000  | -1.807745000 | -0.423383000 |
| C  | 2.867457000  | 0.587525000  | -0.442023000 |
| C  | -1.894990000 | -2.444013000 | 0.137972000  |

|   |              |              |              |
|---|--------------|--------------|--------------|
| C | -0.678575000 | 2.991582000  | 0.035250000  |
| C | -3.085798000 | -0.584014000 | -0.066687000 |
| C | -2.545590000 | 1.811046000  | -0.122489000 |
| C | 1.588988000  | -3.923862000 | -0.127966000 |
| C | 3.098466000  | 2.827177000  | -0.207265000 |
| C | 2.720179000  | -3.201927000 | -0.391950000 |
| C | 3.808445000  | 1.684014000  | -0.450166000 |
| C | -3.290400000 | -2.822574000 | 0.206909000  |
| C | -1.778744000 | 3.934585000  | 0.048644000  |
| C | -4.024296000 | -1.678099000 | 0.066920000  |
| C | -2.928891000 | 3.207644000  | -0.063661000 |
| H | 1.482690000  | -4.994463000 | -0.026095000 |
| H | 3.460228000  | 3.843451000  | -0.143732000 |
| H | 3.728221000  | -3.561357000 | -0.541873000 |
| H | 4.870720000  | 1.573552000  | -0.614861000 |
| H | -3.641723000 | -3.836356000 | 0.335691000  |
| H | -1.662489000 | 5.006341000  | 0.122892000  |
| H | -5.098754000 | -1.562937000 | 0.066266000  |
| H | -3.949764000 | 3.560840000  | -0.091107000 |
| C | -0.831345000 | -3.331934000 | 0.168628000  |
| C | 0.661479000  | 3.340345000  | 0.069911000  |
| C | -3.439317000 | 0.753894000  | -0.148458000 |
| C | 3.216244000  | -0.746065000 | -0.574010000 |
| H | -1.059281000 | -4.384301000 | 0.297358000  |
| H | 0.906674000  | 4.393328000  | 0.153387000  |
| H | -4.497005000 | 0.992075000  | -0.174093000 |
| H | 4.261011000  | -0.977629000 | -0.749172000 |
| O | -0.096901000 | -0.051439000 | 1.658107000  |
| H | -0.429061000 | -0.888526000 | -2.286523000 |
| H | 0.949212000  | -0.013178000 | 2.149323000  |
| H | 2.546236000  | 1.045352000  | 2.425790000  |
| H | 1.990123000  | -0.111706000 | 3.750415000  |
| H | 2.711256000  | -0.767615000 | 2.183170000  |
| C | 2.198056000  | 0.047943000  | 2.691511000  |
| O | -0.225758000 | 0.002929000  | -1.931582000 |

### 2-<sup>2</sup>ts1<sub>(ls)</sub>

|    |              |              |              |
|----|--------------|--------------|--------------|
| Fe | 0.089784000  | 0.011802000  | -0.119765000 |
| N  | 1.851561000  | 0.990281000  | 0.008417000  |
| N  | -0.891791000 | 1.749811000  | -0.178459000 |
| N  | 1.083850000  | -1.752143000 | -0.140484000 |
| N  | -1.656903000 | -0.975306000 | -0.196275000 |
| C  | 3.115031000  | 0.434608000  | -0.017490000 |
| C  | -2.246458000 | 1.933965000  | -0.392970000 |
| C  | 2.020821000  | 2.353450000  | 0.129237000  |
| C  | -0.337913000 | 3.011130000  | -0.050568000 |
| C  | 2.457058000  | -1.929112000 | -0.126517000 |
| C  | -2.910679000 | -0.425608000 | -0.401340000 |
| C  | 0.523143000  | -3.013451000 | -0.029364000 |
| C  | -1.839630000 | -2.345468000 | -0.095184000 |
| C  | 4.109677000  | 1.482935000  | 0.096637000  |
| C  | -2.549374000 | 3.348541000  | -0.399424000 |
| C  | 3.434728000  | 2.665199000  | 0.197615000  |
| C  | -1.375490000 | 4.011384000  | -0.176544000 |
| C  | 2.762693000  | -3.340816000 | -0.051709000 |
| C  | -3.905559000 | -1.473410000 | -0.406574000 |
| C  | 1.571526000  | -4.007950000 | 0.019986000  |
| C  | -3.247693000 | -2.655104000 | -0.203311000 |
| H  | 5.176747000  | 1.312464000  | 0.102672000  |
| H  | -3.537674000 | 3.759359000  | -0.548491000 |
| H  | 3.834781000  | 3.664115000  | 0.296392000  |
| H  | -1.204866000 | 5.076474000  | -0.112116000 |
| H  | 3.763894000  | -3.747094000 | -0.035668000 |
| H  | -4.964352000 | -1.307384000 | -0.545097000 |
| H  | 1.399217000  | -5.071807000 | 0.099461000  |
| H  | -3.657562000 | -3.653649000 | -0.151077000 |
| C  | 3.403717000  | -0.917158000 | -0.103416000 |
| C  | -3.188046000 | 0.926257000  | -0.519176000 |
| C  | -0.833509000 | -3.291984000 | 0.010191000  |
| C  | 1.006222000  | 3.296026000  | 0.123339000  |
| H  | 4.448252000  | -1.208767000 | -0.100994000 |
| H  | -4.220376000 | 1.217335000  | -0.678161000 |
| H  | -1.130128000 | -4.332216000 | 0.087985000  |
| H  | 1.289065000  | 4.338963000  | 0.214351000  |

|   |              |              |              |
|---|--------------|--------------|--------------|
| O | 0.110672000  | -0.043567000 | 1.655879000  |
| H | -0.928932000 | -0.079001000 | 2.162695000  |
| O | 0.201438000  | 0.054875000  | -1.935258000 |
| H | 0.535247000  | -0.786467000 | -2.313426000 |
| H | -2.604435000 | 0.854433000  | 2.224338000  |
| H | -2.618245000 | -0.966966000 | 2.458747000  |
| H | -1.931727000 | 0.124735000  | 3.778935000  |
| C | -2.168126000 | -0.010158000 | 2.722582000  |

### 2<sup>-6</sup>int1<sub>(hs)</sub>

|    |              |              |              |
|----|--------------|--------------|--------------|
| Fe | 0.075902000  | 0.006397000  | 0.187538000  |
| N  | -1.868853000 | -0.504132000 | -0.369221000 |
| N  | -0.412550000 | 2.010154000  | -0.132045000 |
| N  | 2.108169000  | 0.501045000  | 0.050077000  |
| N  | 0.639441000  | -2.003047000 | -0.135864000 |
| C  | -2.372817000 | -1.787443000 | -0.462060000 |
| C  | -3.808167000 | -1.718628000 | -0.655916000 |
| H  | -4.457860000 | -2.575810000 | -0.763546000 |
| C  | -4.149655000 | -0.390133000 | -0.684410000 |
| H  | -5.131646000 | 0.042128000  | -0.815195000 |
| C  | -2.928908000 | 0.370087000  | -0.505131000 |
| C  | -2.837667000 | 1.766207000  | -0.471828000 |
| C  | -1.679263000 | 2.525692000  | -0.318079000 |
| C  | -1.596127000 | 3.976851000  | -0.374991000 |
| H  | -2.439714000 | 4.638242000  | -0.514060000 |
| C  | -0.275091000 | 4.308556000  | -0.242578000 |
| H  | 0.169369000  | 5.293775000  | -0.251201000 |
| C  | 0.467377000  | 3.064689000  | -0.102413000 |
| C  | 1.858486000  | 2.961056000  | 0.013284000  |
| C  | 2.616052000  | 1.796620000  | 0.069454000  |
| C  | 4.058235000  | 1.722659000  | 0.166134000  |
| H  | 4.714595000  | 2.580213000  | 0.211902000  |
| C  | 4.406648000  | 0.395398000  | 0.192383000  |
| H  | 5.398690000  | -0.027930000 | 0.263093000  |
| C  | 3.185892000  | -0.377809000 | 0.112284000  |
| C  | 3.084616000  | -1.765709000 | 0.098340000  |
| C  | 1.911268000  | -2.522016000 | -0.017062000 |
| C  | 1.840208000  | -3.972364000 | -0.053973000 |
| H  | 2.692659000  | -4.633311000 | 0.016078000  |
| C  | 0.519675000  | -4.308484000 | -0.193470000 |
| H  | 0.087198000  | -5.296963000 | -0.259627000 |
| C  | -0.235184000 | -3.068666000 | -0.245025000 |
| C  | -1.617603000 | -2.962659000 | -0.393423000 |
| H  | -2.168559000 | -3.894756000 | -0.475721000 |
| H  | 4.014472000  | -2.321213000 | 0.169700000  |
| H  | -3.765681000 | 2.313890000  | -0.605123000 |
| H  | 2.410472000  | 3.895751000  | 0.036050000  |
| O  | 0.902002000  | 0.253459000  | -1.925439000 |
| O  | -0.095671000 | -0.065727000 | 2.021011000  |
| H  | -0.913915000 | -0.107881000 | 2.557971000  |
| C  | -3.138286000 | -0.120675000 | 2.821709000  |
| H  | -3.216654000 | -0.919237000 | 2.093020000  |
| H  | -3.201587000 | -0.337470000 | 3.882989000  |
| H  | -3.095391000 | 0.906746000  | 2.477565000  |
| H  | 1.357871000  | -0.611858000 | -2.074477000 |

### 2<sup>-4</sup>int1<sub>(hs)</sub>

|    |              |              |              |
|----|--------------|--------------|--------------|
| Fe | 0.126594000  | 0.020619000  | -0.124179000 |
| N  | -1.879176000 | -0.515223000 | -0.220849000 |
| N  | -0.406102000 | 2.008927000  | -0.174527000 |
| N  | 2.120043000  | 0.526033000  | 0.043972000  |
| N  | 0.648073000  | -2.000777000 | -0.193205000 |
| C  | -2.380041000 | -1.803919000 | -0.257733000 |
| C  | -3.822832000 | -1.735668000 | -0.388418000 |
| H  | -4.476048000 | -2.595476000 | -0.438665000 |
| C  | -4.164524000 | -0.409267000 | -0.458025000 |
| H  | -5.150634000 | 0.019208000  | -0.569224000 |
| C  | -2.939204000 | 0.359541000  | -0.363031000 |
| C  | -2.847725000 | 1.751984000  | -0.392621000 |
| C  | -1.683002000 | 2.513401000  | -0.301935000 |
| C  | -1.612100000 | 3.964865000  | -0.301203000 |
| H  | -2.465953000 | 4.621645000  | -0.390454000 |

|   |              |              |              |
|---|--------------|--------------|--------------|
| C | -0.293337000 | 4.306790000  | -0.166674000 |
| H | 0.137969000  | 5.297065000  | -0.126363000 |
| C | 0.468189000  | 3.071536000  | -0.086484000 |
| C | 1.852839000  | 2.977899000  | 0.053844000  |
| C | 2.613511000  | 1.809860000  | 0.111385000  |
| C | 4.061698000  | 1.745693000  | 0.226514000  |
| H | 4.710276000  | 2.607205000  | 0.300270000  |
| C | 4.411892000  | 0.422662000  | 0.217184000  |
| H | 5.401990000  | -0.006049000 | 0.282077000  |
| C | 3.184035000  | -0.347145000 | 0.097446000  |
| C | 3.094908000  | -1.738028000 | 0.044386000  |
| C | 1.930549000  | -2.499862000 | -0.065397000 |
| C | 1.860201000  | -3.948509000 | -0.011738000 |
| H | 2.717420000  | -4.600840000 | 0.077915000  |
| C | 0.536612000  | -4.297170000 | -0.075713000 |
| H | 0.106728000  | -5.288580000 | -0.049221000 |
| C | -0.229578000 | -3.068765000 | -0.173161000 |
| C | -1.621002000 | -2.974287000 | -0.215725000 |
| H | -2.171290000 | -3.909837000 | -0.224252000 |
| H | 4.027691000  | -2.287893000 | 0.119720000  |
| H | -3.780382000 | 2.297410000  | -0.495940000 |
| H | 2.397860000  | 3.914696000  | 0.112906000  |
| O | 0.237538000  | 0.041114000  | -1.939983000 |
| O | 0.036330000  | -0.053812000 | 1.671951000  |
| H | -0.886838000 | -0.166534000 | 2.032725000  |
| C | -2.692006000 | -0.028761000 | 2.869684000  |
| H | -3.158662000 | -0.798055000 | 2.264421000  |
| H | -2.342859000 | -0.258576000 | 3.871203000  |
| H | -2.739187000 | 1.003254000  | 2.539069000  |
| H | 0.435161000  | -0.852978000 | -2.296539000 |

### 2<sup>-4</sup>int1<sub>(is)</sub>

|    |              |              |              |
|----|--------------|--------------|--------------|
| Fe | 0.140180000  | 0.008559000  | -0.126805000 |
| N  | 0.808211000  | 1.897304000  | -0.104642000 |
| N  | 2.017834000  | -0.673638000 | 0.045909000  |
| N  | -0.543505000 | -1.894918000 | -0.246893000 |
| N  | -1.768678000 | 0.676687000  | -0.222208000 |
| C  | 0.042493000  | 3.047655000  | -0.099635000 |
| C  | 0.907789000  | 4.208774000  | -0.072667000 |
| H  | 0.555746000  | 5.230411000  | -0.066137000 |
| C  | 2.193349000  | 3.749478000  | -0.060657000 |
| H  | 3.112532000  | 4.317071000  | -0.037606000 |
| C  | 2.127599000  | 2.302683000  | -0.067731000 |
| C  | 3.229851000  | 1.468444000  | 0.008287000  |
| C  | 3.169688000  | 0.087348000  | 0.081990000  |
| C  | 4.321575000  | -0.778490000 | 0.223335000  |
| H  | 5.342734000  | -0.429187000 | 0.277056000  |
| C  | 3.855232000  | -2.060899000 | 0.274354000  |
| H  | 4.415861000  | -2.979243000 | 0.374534000  |
| C  | 2.413821000  | -1.993889000 | 0.152657000  |
| C  | 1.580168000  | -3.098193000 | 0.101822000  |
| C  | 0.209100000  | -3.047864000 | -0.090740000 |
| C  | -0.653998000 | -4.204713000 | -0.165678000 |
| H  | -0.311865000 | -5.226085000 | -0.079104000 |
| C  | -1.928219000 | -3.746658000 | -0.355948000 |
| H  | -2.841101000 | -4.316686000 | -0.453963000 |
| C  | -1.861677000 | -2.302955000 | -0.389042000 |
| C  | -2.960545000 | -1.465126000 | -0.492032000 |
| C  | -2.911488000 | -0.082915000 | -0.410217000 |
| C  | -4.065749000 | 0.784304000  | -0.474592000 |
| H  | -5.080711000 | 0.438968000  | -0.610008000 |
| C  | -3.613205000 | 2.067571000  | -0.336119000 |
| H  | -4.181548000 | 2.986639000  | -0.344244000 |
| C  | -2.175262000 | 1.999177000  | -0.200147000 |
| C  | -1.340320000 | 3.102236000  | -0.123152000 |
| H  | -1.804311000 | 4.082358000  | -0.114983000 |
| H  | -3.933819000 | -1.926642000 | -0.617697000 |
| H  | 4.209695000  | 1.931706000  | 0.041180000  |
| H  | 2.036740000  | -4.076708000 | 0.201919000  |
| O  | 0.249816000  | 0.048346000  | -1.934327000 |
| O  | 0.017085000  | -0.046996000 | 1.667750000  |
| H  | -0.902796000 | 0.071982000  | 2.016528000  |
| C  | -2.796918000 | 0.028341000  | 2.867709000  |
| H  | -2.458811000 | 0.201122000  | 3.883951000  |

|   |              |              |              |
|---|--------------|--------------|--------------|
| H | -2.873632000 | -0.984958000 | 2.488215000  |
| H | -3.183457000 | 0.848155000  | 2.272447000  |
| H | 0.062099000  | -0.826112000 | -2.338485000 |

**2<sup>-2</sup>int1<sub>(is)</sub>**

|    |              |              |              |
|----|--------------|--------------|--------------|
| Fe | 0.132158000  | 0.010494000  | -0.123863000 |
| N  | 0.800429000  | 1.899495000  | -0.102439000 |
| N  | 2.016071000  | -0.672792000 | 0.040244000  |
| N  | -0.546045000 | -1.893903000 | -0.239443000 |
| N  | -1.770167000 | 0.675637000  | -0.220416000 |
| C  | 0.035320000  | 3.049296000  | -0.082708000 |
| C  | 0.900763000  | 4.210454000  | -0.059390000 |
| H  | 0.548962000  | 5.232071000  | -0.043420000 |
| C  | 2.186328000  | 3.750989000  | -0.066839000 |
| H  | 3.105758000  | 4.318489000  | -0.052693000 |
| C  | 2.120544000  | 2.304043000  | -0.079985000 |
| C  | 3.224124000  | 1.470442000  | -0.017598000 |
| C  | 3.166792000  | 0.089200000  | 0.061731000  |
| C  | 4.320491000  | -0.774635000 | 0.203839000  |
| H  | 5.341826000  | -0.424388000 | 0.247318000  |
| C  | 3.854977000  | -2.056585000 | 0.272879000  |
| H  | 4.416687000  | -2.973533000 | 0.379712000  |
| C  | 2.412497000  | -1.991027000 | 0.159712000  |
| C  | 1.577407000  | -3.095288000 | 0.122823000  |
| C  | 0.206791000  | -3.045780000 | -0.072909000 |
| C  | -0.655058000 | -4.203401000 | -0.151462000 |
| H  | -0.313116000 | -5.224241000 | -0.057990000 |
| C  | -1.927478000 | -3.747103000 | -0.357664000 |
| H  | -2.838721000 | -4.318310000 | -0.463720000 |
| C  | -1.861603000 | -2.303456000 | -0.395064000 |
| C  | -2.959587000 | -1.465790000 | -0.509244000 |
| C  | -2.911335000 | -0.084144000 | -0.420630000 |
| C  | -4.066518000 | 0.781640000  | -0.479826000 |
| H  | -5.080320000 | 0.436010000  | -0.622949000 |
| C  | -3.617260000 | 2.064179000  | -0.324036000 |
| H  | -4.187642000 | 2.982020000  | -0.323593000 |
| C  | -2.179880000 | 1.997647000  | -0.184527000 |
| C  | -1.347900000 | 3.101950000  | -0.097174000 |
| H  | -1.814025000 | 4.080892000  | -0.078691000 |
| H  | -3.931723000 | -1.926982000 | -0.644417000 |
| H  | 4.203705000  | 1.934975000  | 0.004634000  |
| H  | 2.033257000  | -4.073294000 | 0.230921000  |
| O  | 0.264720000  | 0.042518000  | -1.931806000 |
| O  | 0.029006000  | -0.047037000 | 1.667936000  |
| H  | -0.892294000 | 0.043466000  | 2.029362000  |
| C  | -2.752846000 | 0.018989000  | 2.836275000  |
| H  | -2.404813000 | 0.167499000  | 3.853152000  |
| H  | -2.866262000 | -0.986567000 | 2.445553000  |
| H  | -3.131900000 | 0.856160000  | 2.260961000  |
| H  | 0.163286000  | -0.849749000 | -2.327567000 |

**2<sup>-2</sup>int1<sub>(ls)</sub>**

|    |              |              |              |
|----|--------------|--------------|--------------|
| Fe | -0.129132000 | 0.014235000  | -0.125856000 |
| N  | -2.033336000 | -0.607936000 | 0.048011000  |
| N  | 0.487995000  | -1.916445000 | -0.242428000 |
| N  | -0.733883000 | 1.920202000  | -0.113296000 |
| N  | 1.794721000  | 0.612442000  | -0.215862000 |
| C  | -3.158033000 | 0.190794000  | 0.085909000  |
| C  | 1.790917000  | -2.371296000 | -0.375941000 |
| C  | -2.474562000 | -1.913398000 | 0.150414000  |
| C  | -0.305949000 | -3.043104000 | -0.096874000 |
| C  | -2.039968000 | 2.369642000  | -0.080075000 |
| C  | 2.914851000  | -0.186806000 | -0.385676000 |
| C  | 0.067351000  | 3.046082000  | -0.121134000 |
| C  | 2.248337000  | 1.920939000  | -0.198666000 |
| C  | -4.340141000 | -0.634613000 | 0.227380000  |
| C  | 1.807040000  | -3.816980000 | -0.349317000 |
| C  | -3.918146000 | -1.932275000 | 0.273696000  |
| C  | 0.515911000  | -4.230302000 | -0.171615000 |
| C  | -2.058884000 | 3.818186000  | -0.088474000 |
| C  | 4.098565000  | 0.639708000  | -0.441308000 |
| C  | -0.759322000 | 4.235472000  | -0.106936000 |

|   |              |              |              |
|---|--------------|--------------|--------------|
| C | 3.688791000  | 1.938995000  | -0.318047000 |
| H | -5.348729000 | -0.250644000 | 0.282600000  |
| H | 2.699917000  | -4.418662000 | -0.442702000 |
| H | -4.509880000 | -2.831262000 | 0.371006000  |
| H | 0.137123000  | -5.239337000 | -0.092677000 |
| H | -2.959161000 | 4.415585000  | -0.070779000 |
| H | 5.102669000  | 0.259108000  | -0.562863000 |
| H | -0.374521000 | 5.245260000  | -0.111510000 |
| H | 4.288709000  | 2.837817000  | -0.326514000 |
| C | -3.169364000 | 1.573524000  | 0.006203000  |
| C | 2.918564000  | -1.570232000 | -0.465381000 |
| C | 1.451609000  | 3.053057000  | -0.138199000 |
| C | -1.678679000 | -3.045586000 | 0.092708000  |
| H | -4.132584000 | 2.070822000  | 0.038006000  |
| H | 3.877406000  | -2.063637000 | -0.581254000 |
| H | 1.949442000  | 4.016570000  | -0.136560000 |
| H | -2.169076000 | -4.008338000 | 0.186869000  |
| O | -0.030732000 | -0.065315000 | 1.665832000  |
| H | 0.894078000  | 0.035042000  | 2.035329000  |
| O | -0.265007000 | 0.040301000  | -1.929380000 |
| H | -0.101064000 | -0.844141000 | -2.324673000 |
| H | 2.819884000  | -0.983503000 | 2.517441000  |
| H | 3.067211000  | 0.853078000  | 2.269926000  |
| H | 2.292528000  | 0.216452000  | 3.860197000  |
| C | 2.664596000  | 0.035189000  | 2.856970000  |

**2<sup>-6</sup>ts2<sub>(hs)</sub>**

|    |              |              |              |
|----|--------------|--------------|--------------|
| Fe | -0.107232000 | 0.013271000  | -0.185541000 |
| N  | -2.176519000 | 0.047725000  | -0.071924000 |
| N  | -0.149785000 | -2.069878000 | -0.054037000 |
| N  | -0.064035000 | 2.074356000  | -0.145557000 |
| N  | 1.959141000  | -0.054721000 | -0.337494000 |
| C  | -2.954953000 | 1.187253000  | 0.027137000  |
| C  | 0.943782000  | -2.907818000 | -0.178092000 |
| C  | -3.007006000 | -1.049928000 | 0.070724000  |
| C  | -1.284423000 | -2.856215000 | 0.016006000  |
| C  | -1.153428000 | 2.912402000  | -0.060138000 |
| C  | 2.742464000  | -1.187773000 | -0.376557000 |
| C  | 1.073761000  | 2.851395000  | -0.192305000 |
| C  | 2.791068000  | 1.043255000  | -0.355770000 |
| C  | -4.339439000 | 0.788073000  | 0.195217000  |
| C  | 0.478440000  | -4.281971000 | -0.151945000 |
| C  | -4.371483000 | -0.581676000 | 0.222222000  |
| C  | -0.886314000 | -4.250585000 | -0.032078000 |
| C  | -0.683521000 | 4.288074000  | -0.050772000 |
| C  | 4.137598000  | -0.786786000 | -0.446790000 |
| C  | 0.682618000  | 4.250326000  | -0.130528000 |
| C  | 4.166985000  | 0.582565000  | -0.431175000 |
| H  | -5.167777000 | 1.475655000  | 0.292616000  |
| H  | 1.120740000  | -5.148259000 | -0.225533000 |
| H  | -5.230866000 | -1.225541000 | 0.345778000  |
| H  | -1.570818000 | -5.086072000 | 0.010640000  |
| H  | -1.324436000 | 5.156329000  | 0.009816000  |
| H  | 4.972747000  | -1.471343000 | -0.494580000 |
| H  | 1.372826000  | 5.082002000  | -0.148611000 |
| H  | 5.031021000  | 1.231073000  | -0.464946000 |
| C  | -2.484906000 | 2.500962000  | 0.011025000  |
| C  | 2.271164000  | -2.500122000 | -0.315531000 |
| C  | 2.381659000  | 2.376436000  | -0.290265000 |
| C  | -2.595506000 | -2.382998000 | 0.090389000  |
| H  | -3.232886000 | 3.283742000  | 0.087290000  |
| H  | 3.015525000  | -3.287707000 | -0.377258000 |
| H  | 3.167416000  | 3.124941000  | -0.316022000 |
| H  | -3.377678000 | -3.130938000 | 0.173196000  |
| O  | 0.048651000  | 0.043479000  | 1.650821000  |
| H  | 0.213927000  | -0.860384000 | 2.000761000  |
| O  | -0.212235000 | -0.048849000 | -2.006773000 |
| H  | -1.135611000 | -0.071426000 | -2.340197000 |
| H  | 2.114992000  | 1.086503000  | 2.848771000  |
| H  | 2.302078000  | -0.325405000 | 4.075732000  |
| H  | 2.854145000  | -0.534333000 | 2.287726000  |
| C  | 2.423064000  | 0.074581000  | 3.074159000  |

**2<sup>-4</sup>ts2<sub>(hs)</sub>**

|    |              |              |              |
|----|--------------|--------------|--------------|
| Fe | 0.099045000  | -0.020884000 | -0.132200000 |
| N  | 1.940814000  | 0.957392000  | -0.089501000 |
| N  | -0.856729000 | 1.840358000  | -0.089858000 |
| N  | 1.065150000  | -1.842165000 | -0.054995000 |
| N  | -1.719527000 | -0.946713000 | -0.276448000 |
| C  | 3.171900000  | 0.336863000  | 0.011584000  |
| C  | -2.211250000 | 2.046881000  | -0.268792000 |
| C  | 2.140508000  | 2.321550000  | 0.015531000  |
| C  | -0.238444000 | 3.077270000  | -0.060738000 |
| C  | 2.426046000  | -2.046003000 | 0.009187000  |
| C  | -2.948712000 | -0.332316000 | -0.402844000 |
| C  | 0.446903000  | -3.072258000 | -0.063359000 |
| C  | -1.923333000 | -2.312687000 | -0.260207000 |
| C  | 4.195524000  | 1.357533000  | 0.141190000  |
| C  | -2.462999000 | 3.475703000  | -0.307510000 |
| C  | 3.563807000  | 2.573271000  | 0.145099000  |
| C  | -1.254078000 | 4.107463000  | -0.176220000 |
| C  | 2.681017000  | -3.476801000 | 0.051631000  |
| C  | -3.975169000 | -1.356108000 | -0.475278000 |
| C  | 1.466190000  | -4.106531000 | 0.009147000  |
| C  | -3.347413000 | -2.569868000 | -0.382482000 |
| H  | 5.253756000  | 1.156214000  | 0.230497000  |
| H  | -3.438900000 | 3.924033000  | -0.430499000 |
| H  | 4.007324000  | 3.554695000  | 0.237270000  |
| H  | -1.054421000 | 5.169809000  | -0.173368000 |
| H  | 3.663146000  | -3.924951000 | 0.105697000  |
| H  | -5.032999000 | -1.158659000 | -0.576374000 |
| H  | 1.264753000  | -5.168405000 | 0.021057000  |
| H  | -3.793640000 | -3.554188000 | -0.398761000 |
| C  | 3.393006000  | -1.041358000 | 0.034346000  |
| C  | -3.172088000 | 1.044133000  | -0.406091000 |
| C  | -0.929183000 | -3.285208000 | -0.151434000 |
| C  | 1.138152000  | 3.293145000  | 0.013426000  |
| H  | 4.427220000  | -1.363520000 | 0.103841000  |
| H  | -4.200958000 | 1.369312000  | -0.523633000 |
| H  | -1.261629000 | -4.318504000 | -0.150647000 |
| H  | 1.465557000  | 4.326912000  | 0.061916000  |
| O  | 0.075873000  | -0.014961000 | 1.682583000  |
| H  | -0.452615000 | 0.726610000  | 2.055055000  |
| O  | 0.192307000  | 0.041104000  | -1.942410000 |
| H  | 0.991267000  | 0.529659000  | -2.240667000 |
| H  | -2.447957000 | -1.060082000 | 2.323742000  |
| H  | -2.173447000 | -0.097794000 | 3.912934000  |
| H  | -2.907456000 | 0.750892000  | 2.400657000  |
| C  | -2.499980000 | -0.133062000 | 2.879268000  |

### 2<sup>-4</sup>ts2<sub>(is)</sub>

|    |              |              |              |
|----|--------------|--------------|--------------|
| Fe | -0.116650000 | 0.014711000  | -0.162698000 |
| N  | 1.723890000  | -0.849554000 | -0.347789000 |
| N  | 0.744977000  | 1.835084000  | -0.170231000 |
| N  | -0.946573000 | -1.822640000 | -0.008662000 |
| N  | -1.926491000 | 0.851337000  | -0.028052000 |
| C  | 2.012130000  | -2.203366000 | -0.301364000 |
| C  | 0.094086000  | 3.050382000  | -0.107401000 |
| C  | 2.940353000  | -0.190317000 | -0.387424000 |
| C  | 2.095963000  | 2.115341000  | -0.259979000 |
| C  | -0.288157000 | -3.042866000 | -0.070917000 |
| C  | -2.207981000 | 2.205281000  | -0.004727000 |
| C  | -2.300545000 | -2.110549000 | 0.047526000  |
| C  | -3.142313000 | 0.195423000  | 0.042533000  |
| C  | 3.444343000  | -2.397398000 | -0.355820000 |
| C  | 1.062620000  | 4.126156000  | -0.146700000 |
| C  | 4.016182000  | -1.156207000 | -0.409532000 |
| C  | 2.297127000  | 3.549713000  | -0.239998000 |
| C  | -1.254379000 | -4.116938000 | -0.016501000 |
| C  | -3.639422000 | 2.402909000  | 0.072021000  |
| C  | -2.493133000 | -3.542915000 | 0.054214000  |
| C  | -4.215336000 | 1.164750000  | 0.099802000  |
| H  | 3.930115000  | -3.362671000 | -0.343775000 |
| H  | 0.809513000  | 5.176030000  | -0.110416000 |
| H  | 5.065220000  | -0.899659000 | -0.447648000 |
| H  | 3.263565000  | 4.030015000  | -0.295818000 |
| H  | -0.999358000 | -5.166778000 | -0.041616000 |
| H  | -4.119298000 | 3.370586000  | 0.102500000  |

|   |              |              |              |
|---|--------------|--------------|--------------|
| H | -3.458043000 | -4.027275000 | 0.099358000  |
| H | -5.263813000 | 0.909851000  | 0.157745000  |
| C | 1.080186000  | -3.223867000 | -0.190490000 |
| C | -1.277473000 | 3.229459000  | -0.035316000 |
| C | -3.323415000 | -1.176858000 | 0.075891000  |
| C | 3.116231000  | 1.184092000  | -0.362316000 |
| H | 1.450446000  | -4.243221000 | -0.196210000 |
| H | -1.650129000 | 4.247236000  | -0.002173000 |
| H | -4.340987000 | -1.548082000 | 0.126119000  |
| H | 4.132797000  | 1.558822000  | -0.410368000 |
| O | 0.142341000  | 0.008053000  | 1.668083000  |
| H | 0.502424000  | -0.398841000 | -2.439909000 |
| H | -0.211021000 | -0.813908000 | 2.075031000  |
| O | -0.268848000 | -0.003210000 | -1.980967000 |
| H | 2.336495000  | 0.980967000  | 2.545693000  |
| H | 1.709812000  | -0.009428000 | 4.010550000  |
| H | 2.515542000  | -0.878509000 | 2.548955000  |
| C | 2.183109000  | 0.030117000  | 3.036222000  |

### 2<sup>-2</sup>ts2<sub>(is)</sub>

|    |              |              |              |
|----|--------------|--------------|--------------|
| Fe | -0.098065000 | 0.018191000  | -0.133783000 |
| N  | 0.577196000  | -1.890449000 | -0.097246000 |
| N  | 1.780313000  | 0.681988000  | -0.293942000 |
| N  | -2.004452000 | -0.675569000 | -0.069954000 |
| N  | -0.778195000 | 1.901709000  | -0.052776000 |
| C  | -0.186528000 | -3.045777000 | -0.015594000 |
| C  | 2.192470000  | 2.001685000  | -0.265509000 |
| C  | 1.889186000  | -2.301268000 | -0.269158000 |
| C  | 2.923702000  | -0.082104000 | -0.437800000 |
| C  | -2.408234000 | -1.997025000 | 0.038259000  |
| C  | -0.013644000 | 3.051471000  | -0.043622000 |
| C  | -3.156293000 | 0.090790000  | -0.011560000 |
| C  | -2.098666000 | 2.307417000  | -0.004214000 |
| C  | 0.675277000  | -4.203808000 | -0.092395000 |
| C  | 3.631859000  | 2.066494000  | -0.401254000 |
| C  | 1.952980000  | -3.745225000 | -0.254585000 |
| C  | 4.081725000  | 0.781782000  | -0.514954000 |
| C  | -3.850361000 | -2.059241000 | 0.129416000  |
| C  | -0.876570000 | 4.211836000  | 0.028513000  |
| C  | -4.311507000 | -0.773116000 | 0.093669000  |
| C  | -2.162572000 | 3.753266000  | 0.046710000  |
| H  | 0.327483000  | -5.225836000 | -0.044099000 |
| H  | 4.202513000  | 2.984042000  | -0.408913000 |
| H  | 2.864262000  | -4.315733000 | -0.363610000 |
| H  | 5.097166000  | 0.430438000  | -0.629015000 |
| H  | -4.416402000 | -2.975763000 | 0.215477000  |
| H  | -0.523687000 | 5.232926000  | 0.051062000  |
| H  | -5.331919000 | -0.421519000 | 0.147728000  |
| H  | -3.080887000 | 4.321084000  | 0.091130000  |
| C  | -1.568671000 | -3.098978000 | 0.066487000  |
| C  | 1.366993000  | 3.105097000  | -0.131992000 |
| C  | -3.205339000 | 1.475132000  | 0.000739000  |
| C  | 2.980798000  | -1.465494000 | -0.437194000 |
| H  | -2.029013000 | -4.078238000 | 0.138719000  |
| H  | 1.834198000  | 4.083602000  | -0.118857000 |
| H  | -4.183249000 | 1.941677000  | 0.046311000  |
| H  | 3.953824000  | -1.928453000 | -0.559279000 |
| O  | -0.057203000 | 0.029447000  | 1.679084000  |
| H  | -1.035650000 | -0.396576000 | -2.258526000 |
| H  | 0.308097000  | -0.798686000 | 2.059010000  |
| O  | -0.188343000 | -0.018253000 | -1.938313000 |
| H  | 2.524747000  | 0.923107000  | 2.283496000  |
| H  | 2.117492000  | 0.006604000  | 3.869943000  |
| H  | 2.813277000  | -0.921747000 | 2.387172000  |
| C  | 2.484692000  | 0.002533000  | 2.849682000  |

### 2<sup>-2</sup>ts2<sub>(ls)</sub>

|    |              |              |              |
|----|--------------|--------------|--------------|
| Fe | -0.117282000 | 0.010145000  | -0.128039000 |
| N  | -0.168060000 | -2.011814000 | -0.042028000 |
| N  | 1.885764000  | -0.060388000 | -0.345586000 |
| N  | -2.125498000 | 0.066165000  | -0.010551000 |
| N  | -0.045896000 | 2.014941000  | -0.105687000 |



|   |              |              |              |
|---|--------------|--------------|--------------|
| C | -1.301598000 | -2.802911000 | 0.050335000  |
| C | 2.755997000  | 1.019862000  | -0.344315000 |
| C | 0.903393000  | -2.879410000 | -0.182734000 |
| C | 2.678054000  | -1.198216000 | -0.416454000 |
| C | -2.982183000 | -1.012616000 | 0.079691000  |
| C | 1.086907000  | 2.807249000  | -0.132931000 |
| C | -2.915583000 | 1.197090000  | -0.003248000 |
| C | -1.125990000 | 2.875699000  | -0.056303000 |
| C | -0.925345000 | -4.198324000 | 0.009111000  |
| C | 4.116797000  | 0.548944000  | -0.450002000 |
| C | 0.432805000  | -4.245690000 | -0.137574000 |
| C | 4.068918000  | -0.817112000 | -0.499678000 |
| C | -4.352939000 | -0.545151000 | 0.133261000  |
| C | 0.707186000  | 4.203219000  | -0.082865000 |
| C | -4.311899000 | 0.817935000  | 0.078419000  |
| C | -0.657181000 | 4.245300000  | -0.041112000 |
| H | -1.625271000 | -5.019305000 | 0.070996000  |
| H | 4.984011000  | 1.193130000  | -0.474194000 |
| H | 1.071945000  | -5.113301000 | -0.218463000 |
| H | 4.888825000  | -1.517355000 | -0.572102000 |
| H | -5.215160000 | -1.192572000 | 0.204497000  |
| H | 1.407925000  | 5.025813000  | -0.090134000 |
| H | -5.133419000 | 1.519635000  | 0.097808000  |
| H | -1.304393000 | 5.109798000  | -0.003720000 |
| C | -2.606684000 | -2.344666000 | 0.120678000  |
| C | 2.390584000  | 2.351836000  | -0.237507000 |
| C | -2.459213000 | 2.503989000  | -0.026214000 |
| C | 2.226132000  | -2.506441000 | -0.355724000 |
| H | -3.394713000 | -3.086426000 | 0.190276000  |
| H | 3.183009000  | 3.091980000  | -0.248756000 |
| H | -3.200096000 | 3.295452000  | -0.001081000 |
| H | 2.964412000  | -3.296646000 | -0.436569000 |
| O | 0.015142000  | 0.048550000  | 1.679721000  |
| H | 0.213742000  | -0.827410000 | 2.074332000  |
| O | -0.313394000 | -0.038924000 | -1.926964000 |
| H | 0.547021000  | 0.071867000  | -2.386153000 |
| H | 2.325896000  | 1.037376000  | 2.534280000  |
| H | 2.211618000  | -0.323846000 | 3.818434000  |
| H | 3.078493000  | -0.639235000 | 2.178262000  |
| C | 2.539729000  | 0.024074000  | 2.844534000  |

### 2-<sup>6</sup>P<sub>(hs)</sub>

|    |              |              |              |
|----|--------------|--------------|--------------|
| Fe | -0.070750000 | 0.008655000  | -0.429774000 |
| N  | 1.638911000  | -1.184250000 | -0.151166000 |
| N  | -1.239233000 | -1.683422000 | -0.021062000 |
| N  | -1.752965000 | 1.188251000  | -0.064257000 |
| N  | 1.134403000  | 1.687756000  | -0.165369000 |
| C  | 2.947574000  | -0.742443000 | -0.187047000 |
| C  | 3.835610000  | -1.891709000 | -0.159984000 |
| H  | 4.915202000  | -1.836755000 | -0.176901000 |
| C  | 3.047665000  | -3.011222000 | -0.108365000 |
| H  | 3.360693000  | -4.045511000 | -0.076241000 |
| C  | 1.665307000  | -2.564128000 | -0.104474000 |
| C  | 0.543156000  | -3.394388000 | -0.057813000 |
| C  | -0.794503000 | -2.995449000 | -0.032791000 |
| C  | -1.942131000 | -3.881271000 | -0.008145000 |
| H  | -1.886461000 | -4.960892000 | -0.007465000 |
| C  | -3.064649000 | -3.093935000 | 0.007793000  |
| H  | -4.098378000 | -3.409863000 | 0.024298000  |
| C  | -2.623807000 | -1.712605000 | -0.004379000 |
| C  | -3.455541000 | -0.591485000 | 0.015622000  |
| C  | -3.056007000 | 0.746220000  | 0.010134000  |
| C  | -3.941395000 | 1.895983000  | 0.110291000  |
| H  | -5.018579000 | 1.839634000  | 0.181856000  |
| C  | -3.152269000 | 3.014172000  | 0.106598000  |
| H  | -3.460206000 | 4.048266000  | 0.173452000  |
| C  | -1.772603000 | 2.565326000  | 0.000565000  |
| C  | -0.649195000 | 3.392790000  | -0.021463000 |
| C  | 0.687823000  | 2.994234000  | -0.089309000 |
| C  | 1.834864000  | 3.882492000  | -0.075283000 |
| H  | 1.777659000  | 4.960640000  | -0.019860000 |
| C  | 2.958516000  | 3.098923000  | -0.136748000 |
| H  | 3.991991000  | 3.416342000  | -0.139981000 |
| C  | 2.517362000  | 1.717732000  | -0.187833000 |

|   |              |              |               |
|---|--------------|--------------|---------------|
| C | 3.348094000  | 0.594809000  | -0.2111759000 |
| H | 4.417416000  | 0.782048000  | -0.229139000  |
| H | -0.832459000 | 4.461462000  | 0.035441000   |
| H | 0.730547000  | -4.463665000 | -0.044067000  |
| H | -4.523873000 | -0.780554000 | 0.054210000   |
| O | -0.129621000 | -0.027826000 | -2.270447000  |
| O | -0.039990000 | -0.031728000 | 1.938994000   |
| H | -0.492434000 | -0.891415000 | 2.056636000   |
| C | 1.220642000  | 0.032314000  | 2.671758000   |
| H | 1.702070000  | 0.949962000  | 2.335628000   |
| H | 1.033152000  | 0.079185000  | 3.751239000   |
| H | 1.863680000  | -0.820046000 | 2.427999000   |
| H | 0.321495000  | 0.526060000  | -2.932579000  |

### 2-<sup>4</sup>P<sub>(ls)</sub>

|    |              |              |              |
|----|--------------|--------------|--------------|
| Fe | -0.054190000 | 0.016121000  | -0.309739000 |
| N  | 1.409361000  | 1.407935000  | -0.130273000 |
| N  | 1.341074000  | -1.443550000 | -0.173908000 |
| N  | -1.509292000 | -1.387444000 | -0.010251000 |
| N  | -1.445645000 | 1.469099000  | -0.100202000 |
| C  | 1.243614000  | 2.781387000  | -0.086770000 |
| C  | 2.536888000  | 3.432279000  | -0.107436000 |
| H  | 2.683077000  | 4.502725000  | -0.077365000 |
| C  | 3.480919000  | 2.446058000  | -0.177323000 |
| H  | 4.556466000  | 2.545471000  | -0.215541000 |
| C  | 2.773769000  | 1.182815000  | -0.197123000 |
| C  | 3.381993000  | -0.061702000 | -0.260504000 |
| C  | 2.714344000  | -1.277634000 | -0.248878000 |
| C  | 3.362986000  | -2.569935000 | -0.275996000 |
| H  | 4.432309000  | -2.716291000 | -0.332498000 |
| C  | 2.376405000  | -3.515428000 | -0.217814000 |
| H  | 2.475280000  | -4.591682000 | -0.218671000 |
| C  | 1.115068000  | -2.810002000 | -0.157249000 |
| C  | -0.126661000 | -3.426058000 | -0.087025000 |
| C  | -1.344149000 | -2.764454000 | -0.029543000 |
| C  | -2.636977000 | -3.413120000 | 0.000518000  |
| H  | -2.784125000 | -4.483868000 | -0.001295000 |
| C  | -3.582139000 | -2.424650000 | 0.017048000  |
| H  | -4.658252000 | -2.524173000 | 0.033174000  |
| C  | -2.877283000 | -1.161270000 | 0.000695000  |
| C  | -3.486587000 | 0.084537000  | -0.009174000 |
| C  | -2.819201000 | 1.301087000  | -0.037970000 |
| C  | -3.467554000 | 2.593185000  | 0.027324000  |
| H  | -4.537264000 | 2.738151000  | 0.080455000  |
| C  | -2.479703000 | 3.538664000  | 0.023301000  |
| H  | -2.577538000 | 4.613940000  | 0.071589000  |
| C  | -1.217855000 | 2.834187000  | -0.048407000 |
| C  | 0.027098000  | 3.446353000  | -0.047747000 |
| H  | 0.050669000  | 4.530340000  | -0.011665000 |
| H  | -4.570738000 | 0.110966000  | 0.019643000  |
| H  | 4.465121000  | -0.087201000 | -0.315253000 |
| H  | -0.146464000 | -4.510660000 | -0.091517000 |
| O  | -0.115522000 | -0.020149000 | -2.193448000 |
| O  | -0.053280000 | -0.047085000 | 2.069609000  |
| H  | -0.583785000 | -0.862254000 | 2.174815000  |
| C  | 1.244549000  | -0.155522000 | 2.732270000  |
| H  | 1.119517000  | -0.195596000 | 3.821058000  |
| H  | 1.786669000  | 0.746707000  | 2.451156000  |
| H  | 1.795863000  | -1.031127000 | 2.373312000  |
| H  | -0.633080000 | 0.646332000  | -2.688197000 |

### 2-<sup>2</sup>P<sub>(ls)</sub>

|    |              |              |              |
|----|--------------|--------------|--------------|
| Fe | -0.055436000 | 0.018677000  | -0.178547000 |
| N  | 1.221623000  | 1.571371000  | -0.137383000 |
| N  | 1.530086000  | -1.230721000 | -0.176268000 |
| N  | -1.328432000 | -1.552403000 | -0.029118000 |
| N  | -1.636544000 | 1.258640000  | -0.030073000 |
| C  | 0.866449000  | 2.910018000  | -0.105697000 |
| C  | 2.055063000  | 3.735377000  | -0.148771000 |
| H  | 2.048332000  | 4.816130000  | -0.134360000 |
| C  | 3.129161000  | 2.892402000  | -0.213227000 |
| H  | 4.179656000  | 3.142166000  | -0.261765000 |

|   |              |              |              |
|---|--------------|--------------|--------------|
| C | 2.607576000  | 1.542782000  | -0.208213000 |
| C | 3.381128000  | 0.391824000  | -0.255161000 |
| C | 2.875875000  | -0.900148000 | -0.238492000 |
| C | 3.678887000  | -2.102721000 | -0.263877000 |
| H | 4.758589000  | -2.116792000 | -0.312446000 |
| C | 2.814676000  | -3.161333000 | -0.216704000 |
| H | 3.044097000  | -4.217628000 | -0.220994000 |
| C | 1.474634000  | -2.616102000 | -0.166188000 |
| C | 0.319611000  | -3.383902000 | -0.117451000 |
| C | -0.976253000 | -2.891809000 | -0.074339000 |
| C | -2.168210000 | -3.714277000 | -0.092073000 |
| H | -2.165215000 | -4.794755000 | -0.122634000 |
| C | -3.240196000 | -2.866381000 | -0.079681000 |
| H | -4.292690000 | -3.111799000 | -0.095670000 |
| C | -2.713734000 | -1.518309000 | -0.049538000 |
| C | -3.484522000 | -0.365971000 | -0.041614000 |
| C | -2.977341000 | 0.924456000  | -0.030151000 |
| C | -3.787917000 | 2.126857000  | -0.010892000 |
| H | -4.868680000 | 2.135768000  | -0.006204000 |
| C | -2.926989000 | 3.186008000  | -0.003268000 |
| H | -3.156889000 | 4.242081000  | 0.007208000  |
| C | -1.583363000 | 2.638980000  | -0.022987000 |
| C | -0.428018000 | 3.404730000  | -0.048393000 |
| H | -0.546012000 | 4.483360000  | -0.035316000 |
| H | -4.563084000 | -0.482343000 | -0.052173000 |
| H | 4.458173000  | 0.510693000  | -0.307205000 |
| H | 0.441133000  | -4.462143000 | -0.133359000 |
| O | -0.179347000 | 0.016501000  | -1.979095000 |
| O | -0.033515000 | -0.029970000 | 1.883181000  |
| H | -0.738736000 | -0.640648000 | 2.173064000  |
| C | 1.213865000  | -0.188942000 | 2.635518000  |
| H | 1.031277000  | 0.035566000  | 3.691134000  |
| H | 1.899549000  | 0.536555000  | 2.202353000  |
| H | 1.615022000  | -1.198578000 | 2.506042000  |
| H | 0.710281000  | 0.155046000  | -2.371057000 |

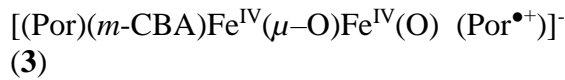

<sup>10</sup>3<sub>(hs, hs)</sub> Or 3-<sup>10</sup>R<sub>(hs, hs)</sub>

|    |               |              |              |
|----|---------------|--------------|--------------|
| Fe | -2.402265000  | 0.104296000  | 1.508908000  |
| N  | -1.359120000  | 1.748731000  | 2.244217000  |
| N  | -1.163243000  | -1.146440000 | 2.617968000  |
| N  | -3.125961000  | -1.557672000 | 0.486137000  |
| N  | -3.3111034000 | 1.338238000  | 0.101156000  |
| C  | -1.561900000  | 3.068320000  | 1.876857000  |
| C  | -0.710483000  | 3.917761000  | 2.695718000  |
| H  | -0.662764000  | 4.994467000  | 2.619725000  |
| C  | -0.005670000  | 3.096346000  | 3.530910000  |
| H  | 0.726806000   | 3.370491000  | 4.277099000  |
| C  | -0.414287000  | 1.730940000  | 3.233158000  |
| C  | 0.100317000   | 0.576569000  | 3.844143000  |
| C  | -0.235791000  | -0.740272000 | 3.563039000  |
| C  | 0.339024000   | -1.919940000 | 4.191277000  |
| H  | 1.095177000   | -1.897527000 | 4.962614000  |
| C  | -0.244922000  | -3.010948000 | 3.610291000  |
| H  | -0.064536000  | -4.056068000 | 3.818899000  |
| C  | -1.185378000  | -2.514537000 | 2.615921000  |
| C  | -1.972255000  | -3.313492000 | 1.771697000  |
| C  | -2.856609000  | -2.880610000 | 0.793547000  |
| C  | -3.630967000  | -3.734198000 | -0.094592000 |
| H  | -3.609332000  | -4.814225000 | -0.080485000 |
| C  | -4.343074000  | -2.912666000 | -0.923339000 |
| H  | -5.023667000  | -3.189798000 | -1.716051000 |
| C  | -4.012226000  | -1.543078000 | -0.555795000 |
| C  | -4.497629000  | -0.390124000 | -1.192590000 |
| C  | -4.175559000  | 0.927921000  | -0.899325000 |
| C  | -4.664037000  | 2.102329000  | -1.605465000 |
| H  | -5.351431000  | 2.075531000  | -2.438559000 |
| C  | -4.079286000  | 3.193643000  | -1.025240000 |
| H  | -4.201358000  | 4.235380000  | -1.286663000 |
| C  | -3.222837000  | 2.702388000  | 0.044545000  |

|    |              |              |              |
|----|--------------|--------------|--------------|
| C  | -2.415935000 | 3.499633000  | 0.871412000  |
| Fe | 0.301701000  | -0.073122000 | -0.949255000 |
| N  | 0.744150000  | 1.946235000  | -0.666864000 |
| N  | -0.987128000 | 0.422329000  | -2.488707000 |
| N  | -0.066509000 | -2.088379000 | -1.251217000 |
| N  | 1.681399000  | -0.560493000 | 0.534096000  |
| C  | 1.584543000  | 2.470021000  | 0.297845000  |
| C  | 1.565764000  | 3.918821000  | 0.196310000  |
| H  | 2.131305000  | 4.587266000  | 0.829303000  |
| C  | 0.706899000  | 4.240193000  | -0.820963000 |
| H  | 0.439020000  | 5.222894000  | -1.182953000 |
| C  | 0.185238000  | 2.989983000  | -1.350271000 |
| C  | -0.760506000 | 2.870536000  | -2.385490000 |
| C  | -1.298722000 | 1.702090000  | -2.909892000 |
| C  | -2.276671000 | 1.610908000  | -3.982742000 |
| H  | -2.701561000 | 2.458095000  | -4.501447000 |
| C  | -2.533718000 | 0.281597000  | -4.181713000 |
| H  | -3.206168000 | -0.168255000 | -4.898446000 |
| C  | -1.718992000 | -0.458532000 | -3.229364000 |
| C  | -1.691454000 | -1.858773000 | -3.086992000 |
| C  | -0.932836000 | -2.605939000 | -2.195957000 |
| C  | -0.908411000 | -4.058407000 | -2.100830000 |
| H  | -1.489954000 | -4.724243000 | -2.721825000 |
| C  | -0.026779000 | -4.381890000 | -1.107863000 |
| H  | 0.260706000  | -5.364907000 | -0.763182000 |
| C  | 0.497321000  | -3.131241000 | -0.579201000 |
| C  | 1.443039000  | -3.010887000 | 0.452134000  |
| C  | 1.992451000  | -1.840184000 | 0.961049000  |
| C  | 2.973775000  | -1.749452000 | 2.027184000  |
| H  | 3.404253000  | -2.597199000 | 2.539908000  |
| C  | 3.223499000  | -0.419804000 | 2.234691000  |
| H  | 3.904909000  | 0.028516000  | 2.943467000  |
| C  | 2.397187000  | 0.321313000  | 1.298208000  |
| C  | 2.338283000  | 1.720229000  | 1.193136000  |
| H  | -1.112167000 | 3.800917000  | -2.820677000 |
| H  | -2.333151000 | -2.419185000 | -3.759742000 |
| H  | 2.965796000  | 2.277305000  | 1.881226000  |
| H  | 1.797566000  | -3.938738000 | 0.889102000  |
| H  | -2.453678000 | 4.569726000  | 0.693693000  |
| H  | -5.187294000 | -0.548681000 | -2.015615000 |
| H  | 0.855337000  | 0.731830000  | 4.608259000  |
| H  | -1.864044000 | -4.387276000 | 1.886628000  |
| O  | -0.933636000 | 0.033296000  | 0.164377000  |
| O  | -3.624127000 | 0.168877000  | 2.617086000  |
| O  | 1.702730000  | -0.182425000 | -2.267196000 |
| C  | 2.841142000  | -0.870804000 | -2.092719000 |
| O  | 2.952790000  | -2.100878000 | -2.271128000 |
| C  | 4.008186000  | -0.043612000 | -1.638198000 |
| C  | 3.961432000  | 1.357782000  | -1.666655000 |
| C  | 5.141126000  | -0.700984000 | -1.130653000 |
| C  | 5.043414000  | 2.103871000  | -1.188904000 |
| H  | 3.068582000  | 1.837359000  | -2.045946000 |
| C  | 6.190106000  | 0.065701000  | -0.645755000 |
| H  | 5.163128000  | -1.783138000 | -1.119537000 |
| C  | 6.172299000  | 1.459414000  | -0.664045000 |
| H  | 5.009637000  | 3.188377000  | -1.213568000 |
| H  | 7.014057000  | 2.023883000  | -0.281127000 |
| Cl | 7.670639000  | -0.789395000 | 0.063012000  |

<sup>8</sup>3<sub>(hs, hs)</sub> or 3-<sup>8</sup>R<sub>(hs, hs)</sub>

|    |              |              |             |
|----|--------------|--------------|-------------|
| Fe | -2.410587629 | 0.114056289  | 1.500364877 |
| N  | -1.398249374 | 1.787964562  | 2.212063270 |
| N  | -1.164737366 | -1.097882186 | 2.646777120 |
| N  | -3.102498180 | -1.576945667 | 0.504463186 |
| N  | -3.323445853 | 1.306648115  | 0.059641023 |
| C  | -1.611885738 | 3.095611843  | 1.812834406 |
| C  | -0.768437619 | 3.972450527  | 2.612536341 |
| H  | -0.730939781 | 5.047509929  | 2.511099593 |
| C  | -0.055567180 | 3.177432240  | 3.465683988 |
| H  | 0.674288927  | 3.475396327  | 4.205287347 |
| C  | -0.451982577 | 1.800962473  | 3.200128054 |
| C  | 0.075526788  | 0.666704838  | 3.836914285 |
| C  | -0.242683667 | -0.659950531 | 3.581522295 |
| C  | 0.356284601  | -1.819796431 | 4.226344919 |

|    |              |              |              |
|----|--------------|--------------|--------------|
| H  | 1.113811104  | -1.771158803 | 4.995177585  |
| C  | -0.206867593 | -2.930000526 | 3.662181825  |
| H  | -0.005832216 | -3.968434945 | 3.884872047  |
| C  | -1.159214936 | -2.466019702 | 2.662064210  |
| C  | -1.929207362 | -3.291906476 | 1.828487966  |
| C  | -2.814493155 | -2.889057987 | 0.838364667  |
| C  | -3.571391948 | -3.771442428 | -0.038033653 |
| H  | -3.533294504 | -4.850566175 | -0.002733163 |
| C  | -4.291613064 | -2.977023581 | -0.885349183 |
| H  | -4.964588838 | -3.279155686 | -1.675441376 |
| C  | -3.983450588 | -1.595076862 | -0.542080882 |
| C  | -4.484964382 | -0.462199824 | -1.201828918 |
| C  | -4.179897624 | 0.865085245  | -0.933793915 |
| C  | -4.682749935 | 2.019386013  | -1.664232761 |
| H  | -5.368393810 | 1.966701110  | -2.497586766 |
| C  | -4.113913957 | 3.129427745  | -1.104962552 |
| H  | -4.250117328 | 4.164266855  | -1.386136676 |
| C  | -3.253942549 | 2.670877884  | -0.022617615 |
| C  | -2.464632051 | 3.496019814  | 0.793447028  |
| Fe | 0.305279729  | -0.082820874 | -0.938049755 |
| N  | 0.678134787  | 1.960242364  | -0.749128402 |
| N  | -1.016056556 | 0.298853375  | -2.481246810 |
| N  | 0.004692982  | -2.119313950 | -1.142810398 |
| N  | 1.714318081  | -0.455813231 | 0.556096924  |
| C  | 1.501520796  | 2.554897498  | 0.189258688  |
| C  | 1.429048770  | 3.996883477  | 0.025785338  |
| H  | 1.972220625  | 4.712008277  | 0.626624499  |
| C  | 0.557779846  | 4.242386440  | -1.001898398 |
| H  | 0.252915119  | 5.197984009  | -1.404787073 |
| C  | 0.080260264  | 2.951955312  | -1.474009691 |
| C  | -0.867980353 | 2.754766925  | -2.496192939 |
| C  | -1.368822039 | 1.546841123  | -2.962001948 |
| C  | -2.339751597 | 1.372486924  | -4.031745891 |
| H  | -2.790646439 | 2.179750908  | -4.590647698 |
| C  | -2.547218448 | 0.027321314  | -4.172068923 |
| H  | -3.199332790 | -0.478363448 | -4.870109934 |
| C  | -1.709892111 | -0.639158549 | -3.185022779 |
| C  | -1.629181394 | -2.031081857 | -2.983363045 |
| C  | -0.841464752 | -2.708947176 | -2.064524362 |
| C  | -0.756990716 | -4.154557331 | -1.911826694 |
| H  | -1.311339371 | -4.867589648 | -2.504656844 |
| C  | 0.141830658  | -4.401775956 | -0.912658751 |
| H  | 0.472106511  | -5.357509269 | -0.531594277 |
| C  | 0.615657020  | -3.110423900 | -0.436578861 |
| C  | 1.561425867  | -2.913037289 | 0.584705389  |
| C  | 2.069415520  | -1.703527855 | 1.040256663  |
| C  | 3.044403784  | -1.530229984 | 2.102680036  |
| H  | 3.504682652  | -2.338213152 | 2.652462542  |
| C  | 3.245194482  | -0.184454164 | 2.250506373  |
| H  | 3.907591537  | 0.319402533  | 2.939755628  |
| C  | 2.394401743  | 0.483545124  | 1.280668845  |
| C  | 2.282888184  | 1.874293660  | 1.114634292  |
| H  | -1.253222618 | 3.652074302  | -2.970223976 |
| H  | -2.248579892 | -2.643497893 | -3.630935427 |
| H  | 2.885928909  | 2.484405087  | 1.779101965  |
| H  | 1.948338168  | -3.808559095 | 1.059755585  |
| H  | -2.513270807 | 4.561401215  | 0.592155962  |
| H  | -5.169358557 | -0.646331218 | -2.023726166 |
| H  | 0.830146381  | 0.847473665  | 4.595700468  |
| H  | -1.802557329 | -4.361695849 | 1.959822314  |
| O  | -0.911920554 | 0.034318932  | 0.194750154  |
| O  | -3.645088781 | 0.183728646  | 2.594058599  |
| O  | 1.696103075  | -0.206495862 | -2.261752638 |
| C  | 2.837920859  | -0.889565149 | -2.075503673 |
| O  | 2.950974646  | -2.121140596 | -2.240320033 |
| C  | 4.002712656  | -0.053533381 | -1.634586797 |
| C  | 3.949562066  | 1.347269919  | -1.678074826 |
| C  | 5.141392439  | -0.700790225 | -1.127146270 |
| C  | 5.031849918  | 2.102773769  | -1.216212173 |
| H  | 3.052104451  | 1.818703770  | -2.056719632 |
| C  | 6.190535332  | 0.075367368  | -0.657873537 |
| H  | 5.168482817  | -1.782646511 | -1.104668726 |
| C  | 6.166846236  | 1.468647442  | -0.691991933 |
| H  | 4.993958683  | 3.186781897  | -1.253222681 |
| H  | 7.008926204  | 2.040735865  | -0.321336823 |

|    |             |              |             |
|----|-------------|--------------|-------------|
| Cl | 7.678750458 | -0.765975532 | 0.050040635 |
|----|-------------|--------------|-------------|

$2^3_{(hs, hs)}$  or  $3^{-2}R_{(hs, hs)}$

|    |              |              |              |
|----|--------------|--------------|--------------|
| Fe | -2.358730672 | 0.105317279  | 1.519177599  |
| N  | -2.888529460 | 1.873052120  | 0.556476339  |
| N  | -0.978178800 | 1.161795188  | 2.667333741  |
| N  | -1.551794206 | -1.679899011 | 2.226483154  |
| N  | -3.469581050 | -0.968570428 | 0.122076390  |
| C  | -3.773910352 | 1.992900417  | -0.488587651 |
| C  | -3.905907663 | 3.396307649  | -0.838540407 |
| H  | -4.538129603 | 3.777539386  | -1.627956804 |
| C  | -3.087845659 | 4.100368385  | 0.006313655  |
| H  | -2.923123851 | 5.168118055  | 0.040831202  |
| C  | -2.446092962 | 3.134732372  | 0.881234613  |
| C  | -1.499090263 | 3.430639087  | 1.864396813  |
| C  | -0.817370047 | 2.527175489  | 2.684364003  |
| C  | 0.203305422  | 2.871521629  | 3.658717905  |
| H  | 0.532085724  | 3.877739193  | 3.877095989  |
| C  | 0.644486104  | 1.697387854  | 4.211319492  |
| H  | 1.402961390  | 1.558920652  | 4.968927547  |
| C  | -0.101546183 | 0.622475712  | 3.580208412  |
| C  | 0.071950358  | -0.741918425 | 3.823275090  |
| C  | -0.587301390 | -1.804234180 | 3.198291221  |
| C  | -0.335486846 | -3.214691742 | 3.438009526  |
| H  | 0.378849963  | -3.600573713 | 4.151375124  |
| C  | -1.155742993 | -3.918534742 | 2.595447001  |
| H  | -1.241600086 | -4.990611738 | 2.487771062  |
| C  | -1.917985534 | -2.945960649 | 1.831551596  |
| C  | -2.841259348 | -3.243258185 | 0.826716222  |
| C  | -3.552771974 | -2.337871145 | 0.034145454  |
| C  | -4.457041497 | -2.689009762 | -1.047250169 |
| H  | -4.705638899 | -3.699656417 | -1.338783774 |
| C  | -4.898331825 | -1.514899778 | -1.599584060 |
| H  | -5.579359528 | -1.381083541 | -2.428239167 |
| C  | -4.268929040 | -0.433419649 | -0.861406378 |
| C  | -4.410314040 | 0.929005369  | -1.134169257 |
| Fe | 0.288021117  | -0.074090819 | -0.959004047 |
| N  | -0.992922906 | 0.521685515  | -2.469166926 |
| N  | -0.138054850 | -2.066093700 | -1.346629916 |
| N  | 1.677062029  | -0.661146435 | 0.477014999  |
| N  | 0.798839588  | 1.920934491  | -0.607583029 |
| C  | -1.279229034 | 1.813877303  | -2.829563832 |
| C  | -2.288598054 | 1.799040290  | -3.873951866 |
| H  | -2.698509245 | 2.679727887  | -4.347775841 |
| C  | -2.594292421 | 0.485404106  | -4.119353376 |
| H  | -3.300984126 | 0.086432040  | -4.833241446 |
| C  | -1.774922989 | -0.317398737 | -3.227940959 |
| C  | -1.786662527 | -1.711258378 | -3.138681156 |
| C  | -1.032528479 | -2.519800716 | -2.279305739 |
| C  | -1.078884289 | -3.972243265 | -2.222078421 |
| H  | -1.697207092 | -4.594290978 | -2.853499742 |
| C  | -0.200222920 | -4.363779495 | -1.247731451 |
| H  | 0.042435755  | -5.368063498 | -0.930867105 |
| C  | 0.393395217  | -3.155843311 | -0.699472647 |
| C  | 1.345281097  | -3.098570415 | 0.315911449  |
| C  | 1.938571217  | -1.952692196 | 0.862853350  |
| C  | 2.905947838  | -1.936959677 | 1.942852605  |
| H  | 3.302560947  | -2.817707304 | 2.427186522  |
| C  | 3.199051183  | -0.623034825 | 2.203241351  |
| H  | 3.885181066  | -0.224906269 | 2.936987327  |
| C  | 2.416201977  | 0.179458811  | 1.283097272  |
| C  | 2.401697975  | 1.571797916  | 1.225874430  |
| C  | 1.655905051  | 2.380867870  | 0.359238689  |
| C  | 1.672194371  | 3.831146618  | 0.328016575  |
| H  | 2.265688934  | 4.455543889  | 0.980734350  |
| C  | 0.806619652  | 4.221624785  | -0.662157804 |
| H  | 0.558225878  | 5.226506980  | -0.973630469 |
| C  | 0.253001932  | 3.012444203  | -1.245654235 |
| C  | -0.699111600 | 2.957155717  | -2.266154176 |
| H  | -2.465465527 | -2.228642293 | -3.808553528 |
| H  | 1.664956623  | -4.047363843 | 0.732988819  |
| H  | -1.041899313 | 3.909970088  | -2.656066663 |
| H  | 3.039861252  | 2.088060552  | 1.934629540  |
| H  | -5.067039887 | 1.189814837  | -1.957516668 |

|    |              |              |              |
|----|--------------|--------------|--------------|
| H  | -3.004046335 | -4.295563092 | 0.618370656  |
| H  | -1.245236492 | 4.478253753  | 1.988250451  |
| H  | 0.820061929  | -1.008318328 | 4.562653047  |
| O  | -0.922108930 | 0.008683825  | 0.177271286  |
| O  | -3.561446602 | 0.181038935  | 2.639744339  |
| O  | 1.670898691  | -0.166739972 | -2.299496973 |
| C  | 2.811532170  | -0.856638957 | -2.144294186 |
| O  | 2.923175335  | -2.083386519 | -2.342600486 |
| C  | 3.980107759  | -0.035834124 | -1.682047392 |
| C  | 3.939156965  | 1.365729537  | -1.704264322 |
| C  | 5.106508593  | -0.700075460 | -1.168896583 |
| C  | 5.019734532  | 2.105394022  | -1.213418990 |
| H  | 3.050316726  | 1.850532390  | -2.086236652 |
| C  | 6.153856363  | 0.060227647  | -0.670355579 |
| H  | 5.124313916  | -1.782373027 | -1.162422665 |
| C  | 6.141399743  | 1.454059513  | -0.681534115 |
| H  | 4.989882066  | 3.190137415  | -1.232369732 |
| H  | 6.981546732  | 2.013410581  | -0.287649884 |
| Cl | 7.624386809  | -0.804082523 | 0.048177985  |

${}^6_3\text{R}_{(\text{is, is})}$  or  $3\text{-}^6\text{R}_{(\text{is, is})}$

|    |              |              |              |
|----|--------------|--------------|--------------|
| Fe | -2.321302076 | 0.064357338  | 1.488911121  |
| N  | -3.607426273 | -0.032823175 | -0.067010808 |
| N  | -2.248961662 | 2.075646244  | 1.289330625  |
| N  | -0.836283816 | 0.154178998  | 2.856619591  |
| N  | -2.192743321 | -1.952843154 | 1.498423532  |
| C  | -4.143634700 | -1.164395189 | -0.624988685 |
| C  | -5.068213417 | -0.812586364 | -1.685876619 |
| H  | -5.622661679 | -1.528537459 | -2.275638630 |
| C  | -5.072789477 | 0.548889467  | -1.771523454 |
| H  | -5.627418877 | 1.181789695  | -2.448759740 |
| C  | -4.156267214 | 1.037880307  | -0.760295603 |
| C  | -3.867122125 | 2.367317705  | -0.538391236 |
| C  | -2.974636346 | 2.847882890  | 0.419228325  |
| C  | -2.668300378 | 4.251805330  | 0.617891460  |
| H  | -3.114025401 | 5.060018356  | 0.055834481  |
| C  | -1.738647232 | 4.317026415  | 1.614257384  |
| H  | -1.259322878 | 5.188593314  | 2.035535683  |
| C  | -1.472099758 | 2.954438333  | 2.031590740  |
| C  | -0.562920697 | 2.593627235  | 3.003113311  |
| C  | -0.265793057 | 1.284715930  | 3.382143389  |
| C  | 0.728426522  | 0.930420448  | 4.377061918  |
| H  | 1.314235241  | 1.645135045  | 4.937244048  |
| C  | 0.762258639  | -0.431985325 | 4.435314146  |
| H  | 1.384210963  | -1.067302414 | 5.048650920  |
| C  | -0.214751116 | -0.918854485 | 3.481305649  |
| C  | -0.470795496 | -2.249466820 | 3.227917950  |
| C  | -1.396466369 | -2.728146420 | 2.301195431  |
| C  | -1.636066757 | -4.134810140 | 2.039596446  |
| H  | -1.131784218 | -4.945064600 | 2.546382263  |
| C  | -2.582782853 | -4.199640127 | 1.059950809  |
| H  | -3.012025402 | -5.073064120 | 0.591352697  |
| C  | -2.928305269 | -2.833940403 | 0.716768044  |
| C  | -3.832734684 | -2.474069065 | -0.258884139 |
| Fe | 0.311035213  | -0.042870004 | -0.990786861 |
| N  | -0.930201463 | 0.681202845  | -2.397980664 |
| N  | -0.208832230 | -1.924045503 | -1.478485027 |
| N  | 1.610473803  | -0.762189899 | 0.380424695  |
| N  | 0.873601861  | 1.843799149  | -0.517536124 |
| C  | -1.149658148 | 1.996791251  | -2.711695215 |
| C  | -2.151091706 | 2.101756913  | -3.754964129 |
| H  | -2.494718244 | 3.033633085  | -4.180700677 |
| C  | -2.541538635 | 0.829907076  | -4.058476169 |
| H  | -3.273273595 | 0.501975463  | -4.782100143 |
| C  | -1.776098980 | -0.059956924 | -3.208937781 |
| C  | -1.874281315 | -1.435284473 | -3.217358906 |
| C  | -1.128077575 | -2.301383622 | -2.418715315 |
| C  | -1.222725096 | -3.748299268 | -2.475182623 |
| H  | -1.873622420 | -4.291940651 | -3.144714830 |
| C  | -0.345793257 | -4.237817016 | -1.553477270 |
| H  | -0.128260752 | -5.266296733 | -1.306089118 |
| C  | 0.289365193  | -3.095362029 | -0.927749076 |
| C  | 1.239955266  | -3.171700086 | 0.064225616  |
| C  | 1.857658725  | -2.078514919 | 0.672380757  |

|    |              |              |              |
|----|--------------|--------------|--------------|
| C  | 2.843805955  | -2.181407746 | 1.727546115  |
| H  | 3.221199945  | -3.113714430 | 2.121867003  |
| C  | 3.174106271  | -0.907406243 | 2.088275816  |
| H  | 3.878084423  | -0.579016702 | 2.838337686  |
| C  | 2.398845577  | -0.017226485 | 1.250764261  |
| C  | 2.453012118  | 1.356887573  | 1.303164758  |
| C  | 1.744898514  | 2.223062812  | 0.469431531  |
| C  | 1.858182044  | 3.666352869  | 0.510521300  |
| H  | 2.489728044  | 4.210021865  | 1.198421360  |
| C  | 1.032067078  | 4.156808007  | -0.459964610 |
| H  | 0.840465125  | 5.185747843  | -0.727525498 |
| C  | 0.409235922  | 3.015676280  | -1.098880807 |
| C  | -0.523296980 | 3.089395153  | -2.112188896 |
| H  | -2.578531644 | -1.882274352 | -3.910174388 |
| H  | 1.541012040  | -4.159024937 | 0.395342662  |
| H  | -0.802139013 | 4.076380997  | -2.464944372 |
| H  | 3.117677709  | 1.803420348  | 2.033625702  |
| H  | -4.331910023 | -3.272144574 | -0.797547072 |
| H  | 0.097885617  | -2.983983045 | 3.787541545  |
| H  | -4.366152691 | 3.099016691  | -1.164377721 |
| H  | -0.021078294 | 3.389906864  | 3.501789333  |
| O  | -0.901300374 | 0.025019904  | 0.149750051  |
| O  | -3.526251309 | 0.106393540  | 2.626822852  |
| O  | 1.689099107  | -0.109710611 | -2.338759628 |
| C  | 2.820182546  | -0.805852118 | -2.186348865 |
| O  | 2.935526877  | -2.029769000 | -2.410184105 |
| C  | 3.984346141  | -0.003231719 | -1.676399874 |
| C  | 3.959834709  | 1.398860282  | -1.682609357 |
| C  | 5.083032719  | -0.685502754 | -1.128509775 |
| C  | 5.027587077  | 2.120990823  | -1.140160342 |
| H  | 3.091774482  | 1.898152521  | -2.093147252 |
| C  | 6.116059561  | 0.057295959  | -0.576593166 |
| H  | 5.089002526  | -1.767872496 | -1.135716624 |
| C  | 6.119228274  | 1.451112371  | -0.569976947 |
| H  | 5.009395059  | 3.206124886  | -1.146513877 |
| H  | 6.947990174  | 1.996209415  | -0.134191593 |
| Cl | 7.544942222  | -0.832522344 | 0.195792555  |

${}^4_3\text{R}_{(\text{is, is})}$  or  $3\text{-}^4\text{R}_{(\text{is, is})}$

|    |              |              |              |
|----|--------------|--------------|--------------|
| Fe | -2.306136507 | 0.065095684  | 1.471676231  |
| N  | -3.601195052 | -0.034299965 | -0.077622991 |
| N  | -2.242375935 | 2.077998077  | 1.278315901  |
| N  | -0.832688929 | 0.157541115  | 2.853033753  |
| N  | -2.188679827 | -1.953567555 | 1.494501884  |
| C  | -4.137665988 | -1.165830498 | -0.632717736 |
| C  | -5.063833925 | -0.815178454 | -1.693545313 |
| H  | -5.619186466 | -1.531727789 | -2.281738700 |
| C  | -5.068771651 | 0.546037148  | -1.780542275 |
| H  | -5.624753887 | 1.178076739  | -2.457495657 |
| C  | -4.150648114 | 1.036452804  | -0.770464945 |
| C  | -3.861840174 | 2.365685934  | -0.548847185 |
| C  | -2.969202357 | 2.848161698  | 0.409148132  |
| C  | -2.665916541 | 4.253319163  | 0.608706525  |
| H  | -3.113326871 | 5.060936092  | 0.047111128  |
| C  | -1.737030569 | 4.320084234  | 1.605434644  |
| H  | -1.260326595 | 5.192597667  | 2.027750808  |
| C  | -1.467754011 | 2.957291906  | 2.022639268  |
| C  | -0.561385051 | 2.597257100  | 2.996565060  |
| C  | -0.265188799 | 1.287995707  | 3.378926897  |
| C  | 0.724179102  | 0.934924016  | 4.380175216  |
| H  | 1.307309766  | 1.650268186  | 4.942364537  |
| C  | 0.756831064  | -0.427196215 | 4.441244975  |
| H  | 1.374854918  | -1.061608901 | 5.059501747  |
| C  | -0.216063722 | -0.915582725 | 3.482766099  |
| C  | -0.472738496 | -2.245937599 | 3.230667619  |
| C  | -1.396236182 | -2.726591321 | 2.301231737  |
| C  | -1.636759413 | -4.134404081 | 2.042729392  |
| H  | -1.135068202 | -4.943902236 | 2.553299293  |
| C  | -2.580835676 | -4.200866633 | 1.060900354  |
| H  | -3.010246160 | -5.075152799 | 0.594038203  |
| C  | -2.924166331 | -2.835077489 | 0.713005959  |
| C  | -3.826914391 | -2.475877539 | -0.263978790 |
| Fe | 0.303495785  | -0.043648419 | -0.979264958 |
| N  | -0.928647169 | 0.701546482  | -2.382909500 |

|    |              |              |              |    |              |              |              |
|----|--------------|--------------|--------------|----|--------------|--------------|--------------|
| N  | -0.227341873 | -1.916906526 | -1.484795794 | C  | -1.457703702 | 2.953264793  | 2.032029322  |
| N  | 1.596365864  | -0.783836318 | 0.387639791  | C  | -0.552778724 | 2.588244931  | 3.005852872  |
| N  | 0.879172335  | 1.834685839  | -0.488004792 | C  | -0.261042663 | 1.277480865  | 3.386453046  |
| C  | -1.138684710 | 2.021330221  | -2.684764072 | C  | 0.726437059  | 0.919506902  | 4.387452557  |
| C  | -2.135201365 | 2.142173852  | -3.731118095 | H  | 1.311451361  | 1.631820792  | 4.951529802  |
| H  | -2.471272750 | 3.080139975  | -4.149443082 | C  | 0.755134400  | -0.443065284 | 4.445451521  |
| C  | -2.532049360 | 0.875733112  | -4.048303371 | H  | 1.370929974  | -1.080560453 | 5.062790721  |
| H  | -3.262522639 | 0.559128988  | -4.778232275 | C  | -0.218513472 | -0.926227103 | 3.485399306  |
| C  | -1.775559071 | -0.027074465 | -3.204159781 | C  | -0.478145006 | -2.255734401 | 3.229101402  |
| C  | -1.881916332 | -1.401443720 | -3.226655365 | C  | -1.401675527 | -2.732022691 | 2.297664326  |
| C  | -1.145027725 | -2.279421650 | -2.432372994 | C  | -1.644931624 | -4.138312034 | 2.034926367  |
| C  | -1.250782280 | -3.725166343 | -2.500330296 | H  | -1.145652498 | -4.950470707 | 2.543638463  |
| H  | -1.902529383 | -4.258375235 | -3.177397399 | C  | -2.588149070 | -4.199832551 | 1.051649965  |
| C  | -0.383062525 | -4.228595658 | -1.577489868 | H  | -3.018974970 | -5.071870582 | 0.581875217  |
| H  | -0.175127666 | -5.260602775 | -1.336599864 | C  | -2.928023874 | -2.832443318 | 0.707477030  |
| C  | 0.258466244  | -3.096008387 | -0.940019379 | C  | -3.829160330 | -2.468225694 | -0.269747526 |
| C  | 1.204308261  | -3.187903022 | 0.054973221  | Fe | 0.301384461  | -0.043780847 | -0.980867222 |
| C  | 1.830442128  | -2.104411308 | 0.671334377  | N  | 0.882493843  | 1.832099268  | -0.483093802 |
| C  | 2.813852988  | -2.223378800 | 1.727524895  | N  | -0.929985374 | 0.710616972  | -2.379533878 |
| H  | 3.181537994  | -3.161846996 | 2.116376932  | N  | -0.233610053 | -1.912901871 | -1.493390130 |
| C  | 3.155771559  | -3.159547325 | 2.096896706  | N  | 1.594547325  | -0.791201877 | -0.382388083 |
| H  | 3.861270202  | -0.638096818 | 2.850468143  | C  | 1.759319208  | 2.190540245  | 0.506224572  |
| C  | 2.390159080  | -0.051856879 | 1.264134205  | C  | 1.888345592  | 3.632466819  | 0.563371048  |
| C  | 2.456438276  | 1.321123536  | 1.327205127  | H  | 2.527695443  | 4.160950316  | 1.255874087  |
| C  | 1.754680033  | 2.199094633  | 0.500747014  | C  | 1.065890204  | 4.142757213  | -0.399366652 |
| C  | 1.879498288  | 3.641193481  | 0.552892597  | H  | 0.884941399  | 5.176614800  | -0.655103500 |
| H  | 2.516842811  | 4.174137408  | 1.243827314  | C  | 0.429483637  | 3.015546007  | -1.050629785 |
| C  | 1.055979259  | 4.145776122  | -0.412309219 | C  | -0.500789561 | 3.111310050  | -2.063142505 |
| H  | 0.872294968  | 5.178238279  | -0.671724847 | C  | -1.135754762 | 2.031520386  | -2.677417562 |
| C  | 0.423346399  | 3.014691249  | -1.059800676 | C  | -2.131409466 | 2.158753552  | -3.724186926 |
| C  | -0.507053678 | 3.104314771  | -2.073468272 | H  | -2.464251293 | 3.099133888  | -4.139651154 |
| H  | -2.586073695 | -1.837406916 | -3.926472110 | C  | -2.531884622 | 0.894716165  | -4.045616034 |
| H  | 1.494573455  | -4.180087816 | 0.380960496  | H  | -3.262607752 | 0.582592734  | -4.777221272 |
| H  | -0.778633288 | 4.096332488  | -2.417463589 | C  | -1.778387121 | -0.013285180 | -3.204023174 |
| H  | 3.124154653  | 1.756501879  | 2.061513094  | C  | -1.887961515 | -1.386848144 | -3.232147744 |
| H  | -4.326186119 | -3.274421460 | -0.801834488 | C  | -1.152483833 | -2.269658499 | -2.441335589 |
| H  | 0.093133818  | -2.980010649 | 3.793686404  | C  | -1.261518244 | -3.715154532 | -2.514666951 |
| H  | -4.361523078 | 3.096967061  | -1.174780928 | H  | -1.914992397 | -4.244275868 | -3.193274065 |
| H  | -0.021284586 | 3.393974184  | 3.496391064  | C  | -0.394252275 | -4.223948910 | -1.594516866 |
| O  | -0.908502677 | 0.020151031  | 0.156802798  | H  | -0.188293560 | -5.257311986 | -1.357770457 |
| O  | -3.511298680 | 0.110287093  | 2.605938692  | C  | 0.250457120  | -3.095127011 | -0.953087893 |
| O  | 1.682570409  | -0.104947263 | -2.323661540 | C  | 1.196345377  | -3.193014901 | 0.040849297  |
| C  | 2.813269597  | -0.803271966 | -2.175853777 | C  | 1.824696999  | -2.113091609 | 0.661641237  |
| O  | 2.924979750  | -2.027654127 | -2.398275325 | C  | 2.806947532  | -2.238355997 | 1.718696181  |
| C  | 3.981709965  | -0.001673008 | -1.674398389 | H  | 3.171645618  | -3.179189436 | 2.104633065  |
| C  | 3.956241759  | 1.400465483  | -1.674227237 | C  | 3.151864877  | -0.972450874 | 2.092741579  |
| C  | 5.086998855  | -0.685582496 | -1.141846079 | H  | 3.857509922  | -0.659906583 | 2.848016862  |
| C  | 5.029644439  | 2.120909663  | -1.140686191 | C  | 2.389367277  | -0.064033461 | 1.262155664  |
| H  | 3.083639223  | 1.901052910  | -2.073337099 | C  | 2.459299522  | 1.308179511  | 1.329839964  |
| C  | 6.126166582  | 0.055500241  | -0.599300627 | H  | -0.769910537 | -4.105057086 | -2.403955202 |
| H  | 5.093341065  | -1.767919513 | -1.153871447 | H  | -2.593389465 | -1.818504556 | -3.933308387 |
| C  | 6.128432942  | 1.449308184  | -0.586543651 | H  | 3.127733685  | 1.739591316  | 2.065797446  |
| H  | 5.010529372  | 3.206033296  | -1.141825991 | H  | 1.484135894  | -4.187048587 | 0.363312325  |
| H  | 6.961974265  | 1.993054370  | -0.158274623 | H  | -4.330023749 | -3.264268205 | -0.809865139 |
| Cl | 7.565425721  | -0.836546478 | 0.150960384  | H  | 0.085551748  | -2.992570719 | 3.790747449  |
|    |              |              |              | H  | -4.348981487 | 3.108139585  | -1.166752510 |
|    |              |              |              | H  | -0.010791618 | 3.382414646  | 3.507740344  |
|    |              |              |              | O  | -0.904954570 | 0.017824056  | 0.161013989  |
|    |              |              |              | O  | -3.509984225 | 0.110414010  | 2.605163108  |
|    |              |              |              | O  | 1.679429425  | -0.102028677 | -2.327256214 |
|    |              |              |              | C  | 2.809963922  | -0.800871158 | -2.180501118 |
|    |              |              |              | O  | 2.921426283  | -2.024923726 | -2.404985108 |
|    |              |              |              | C  | 3.978533288  | -0.000427057 | -1.677538209 |
|    |              |              |              | C  | 3.953983035  | 1.401722999  | -1.676387217 |
|    |              |              |              | C  | 5.082775147  | -0.685438480 | -1.144245607 |
|    |              |              |              | C  | 5.027226443  | 2.121089695  | -1.141083111 |
|    |              |              |              | H  | 3.082127951  | 1.903162041  | -2.076062151 |
|    |              |              |              | C  | 6.121719747  | 0.054581712  | -0.599805875 |
|    |              |              |              | H  | 5.088498702  | -1.767769163 | -1.157086886 |
|    |              |              |              | C  | 6.124862424  | 1.448374890  | -0.586007303 |
|    |              |              |              | H  | 5.008802031  | 3.206220852  | -1.141447471 |
|    |              |              |              | H  | 6.958196574  | 1.991273789  | -0.156263643 |
|    |              |              |              | Cl | 7.559355846  | -0.838967892 | 0.151757511  |

${}^2\mathbf{3}_{(is, is)}$  Or  ${}^3\mathbf{-2}\mathbf{R}_{(is, is)}$

|    |              |              |              |
|----|--------------|--------------|--------------|
| Fe | -2.302319726 | 0.064402035  | 1.472981589  |
| N  | -3.596745291 | -0.027838857 | -0.077752447 |
| N  | -2.233921487 | 2.077888717  | 1.285156015  |
| N  | -0.831621219 | 0.149606434  | 2.857907899  |
| N  | -2.191727840 | -1.954931737 | 1.492044189  |
| C  | -4.136507402 | -1.156767824 | -0.635520212 |
| C  | -5.061387279 | -0.801037393 | -1.695488028 |
| H  | -5.618721267 | -1.514550119 | -2.285502018 |
| C  | -5.062367496 | 0.560521656  | -1.779368665 |
| H  | -5.616487451 | 1.195660934  | -2.454946028 |
| C  | -4.143173400 | 1.045891998  | -0.768079991 |
| C  | -3.851171786 | 2.374072398  | -0.542566301 |
| C  | -2.958478908 | 2.852120838  | 0.417462628  |
| C  | -2.652090245 | 4.255841116  | 0.620969139  |
| H  | -3.097174382 | 5.066075181  | 0.061298161  |
| C  | -1.723301484 | 4.317684685  | 1.618305785  |
| H  | -1.244701499 | 5.187955735  | 2.043109140  |

${}^3\mathbf{-10}\mathbf{ts1}_{(hs, hs)}$

|    |              |              |              |
|----|--------------|--------------|--------------|
| Fe | -2.348568000 | -0.126335000 | 1.184895000  |
| N  | -1.349434000 | 1.230830000  | 2.461909000  |
| N  | -1.354245000 | -1.667820000 | 2.064219000  |
| N  | -3.103750000 | -1.459132000 | -0.270854000 |
| N  | -3.203932000 | 1.437227000  | 0.193781000  |
| C  | -1.492534000 | 2.603216000  | 2.442821000  |
| C  | -0.671830000 | 3.175214000  | 3.502374000  |
| H  | -0.588083000 | 4.231064000  | 3.716605000  |
| C  | -0.050632000 | 2.133070000  | 4.135013000  |
| H  | 0.634159000  | 2.172415000  | 4.970682000  |
| C  | -0.483163000 | 0.912454000  | 3.465081000  |
| C  | -0.082567000 | -0.396875000 | 3.774634000  |
| C  | -0.473967000 | -1.567811000 | 3.135580000  |
| C  | 0.005875000  | -2.897184000 | 3.468462000  |
| H  | 0.708078000  | -3.112489000 | 4.260796000  |
| C  | -0.572211000 | -3.770562000 | 2.589153000  |
| H  | -0.439051000 | -4.841285000 | 2.525127000  |
| C  | -1.413811000 | -2.991003000 | 1.698457000  |
| C  | -2.139662000 | -3.524378000 | 0.618765000  |
| C  | -2.918213000 | -2.826731000 | -0.293852000 |
| C  | -3.669855000 | -3.385084000 | -1.410190000 |
| H  | -3.700930000 | -4.433047000 | -1.671584000 |
| C  | -4.293537000 | -2.339442000 | -2.033858000 |
| H  | -4.939409000 | -2.368862000 | -2.900324000 |
| C  | -3.926680000 | -1.129671000 | -1.306037000 |
| C  | -4.342625000 | 0.177600000  | -1.607161000 |
| C  | -4.011826000 | 1.344145000  | -0.928671000 |
| C  | -4.430030000 | 2.683967000  | -1.313601000 |
| H  | -5.064351000 | 2.907456000  | -2.159158000 |
| C  | -3.858196000 | 3.555249000  | -0.430521000 |
| H  | -3.937798000 | 4.632969000  | -0.406628000 |
| C  | -3.077479000 | 2.763343000  | 0.510265000  |
| C  | -2.291357000 | 3.298990000  | 1.545194000  |
| Fe | 0.466221000  | 0.206644000  | -1.007592000 |
| N  | 0.960534000  | 2.068487000  | -0.182903000 |
| N  | -0.701465000 | 1.137815000  | -2.424766000 |
| N  | 0.028463000  | -1.651546000 | -1.827942000 |
| N  | 1.697342000  | -0.711420000 | 0.390344000  |
| C  | 1.745459000  | 2.284423000  | 0.933882000  |
| C  | 1.781554000  | 3.710378000  | 1.210557000  |
| H  | 2.321748000  | 4.165827000  | 2.027962000  |
| C  | 1.006169000  | 4.323931000  | 0.262761000  |
| H  | 0.794885000  | 5.378525000  | 0.154205000  |
| C  | 0.482566000  | 3.277686000  | -0.602652000 |
| C  | -0.396312000 | 3.469148000  | -1.684946000 |
| C  | -0.938657000 | 2.498066000  | -2.517404000 |
| C  | -1.851036000 | 2.733131000  | -3.625923000 |
| H  | -2.210845000 | 3.705555000  | -3.929866000 |
| C  | -2.144026000 | 1.513932000  | -4.172993000 |
| H  | -2.786817000 | 1.296562000  | -5.014336000 |
| C  | -1.418536000 | 0.513399000  | -3.403656000 |
| C  | -1.455597000 | -0.875632000 | -3.629073000 |
| C  | -0.787657000 | -1.866200000 | -2.921891000 |
| C  | -0.819696000 | -3.294504000 | -3.203550000 |
| H  | -1.381499000 | -3.750153000 | -4.005953000 |
| C  | -0.018597000 | -3.904764000 | -2.279403000 |
| H  | 0.209847000  | -4.956661000 | -2.183588000 |
| C  | 0.509859000  | -2.858111000 | -1.416623000 |
| C  | 1.380075000  | -3.049024000 | -0.331378000 |
| C  | 1.927077000  | -2.073368000 | 0.493874000  |
| C  | 2.826032000  | -2.309252000 | 1.609032000  |
| H  | 3.183440000  | -3.282051000 | 1.913845000  |
| C  | 3.109939000  | -1.091233000 | 2.165142000  |
| H  | 3.752048000  | -0.875113000 | 3.006989000  |
| C  | 2.387650000  | -0.091839000 | 1.398349000  |
| C  | 2.397974000  | 1.289598000  | 1.651554000  |
| H  | -0.689605000 | 4.494650000  | -1.887591000 |
| H  | -2.072443000 | -1.207644000 | -4.458233000 |
| H  | 2.992106000  | 1.614848000  | 2.499300000  |
| H  | 1.671653000  | -4.073232000 | -0.122688000 |
| H  | -2.303959000 | 4.380307000  | 1.641121000  |
| H  | -4.986490000 | 0.293022000  | -2.473573000 |
| H  | 0.623362000  | -0.509854000 | 4.591499000  |
| H  | -2.067331000 | -4.598603000 | 0.480809000  |
| O  | -0.854316000 | 0.109852000  | 0.030852000  |

|    |              |              |              |
|----|--------------|--------------|--------------|
| O  | -3.797435000 | -0.259138000 | 2.229431000  |
| O  | 1.938863000  | 0.353070000  | -2.218574000 |
| C  | 3.043163000  | -0.409803000 | -2.144068000 |
| O  | 3.131301000  | -1.561018000 | -2.615487000 |
| C  | 4.195876000  | 0.228383000  | -1.427172000 |
| C  | 4.193094000  | 1.596237000  | -1.117563000 |
| C  | 5.268071000  | -0.584290000 | -1.022787000 |
| C  | 5.259395000  | 2.154420000  | -0.405472000 |
| H  | 3.344185000  | 2.193730000  | -1.423059000 |
| C  | 6.300473000  | -0.006464000 | -0.299503000 |
| H  | 5.257283000  | -1.637276000 | -1.273402000 |
| C  | 6.326475000  | 1.350495000  | 0.018814000  |
| H  | 5.259861000  | 3.213441000  | -0.168194000 |
| H  | 7.154397000  | 1.766372000  | 0.580446000  |
| Cl | 7.696867000  | -1.075818000 | 0.276871000  |
| H  | -3.750044000 | -1.058149000 | 2.995052000  |
| C  | -3.749928000 | -2.108926000 | 4.011127000  |
| H  | -4.687499000 | -1.897380000 | 4.524723000  |
| H  | -2.838441000 | -1.894762000 | 4.566252000  |
| H  | -3.729431000 | -3.012465000 | 3.404145000  |

### 3-<sup>8</sup>ts1<sub>(hs, hs)</sub>

|    |              |              |              |
|----|--------------|--------------|--------------|
| Fe | -2.333181000 | -0.108662000 | 1.198883000  |
| N  | -1.343372000 | 1.300268000  | 2.424955000  |
| N  | -1.318004000 | -1.610291000 | 2.122452000  |
| N  | -3.083984000 | -1.496811000 | -0.206838000 |
| N  | -3.221560000 | 1.412654000  | 0.168208000  |
| C  | -1.505514000 | 2.669512000  | 2.363931000  |
| C  | -0.691963000 | 3.284691000  | 3.405156000  |
| H  | -0.622688000 | 4.347660000  | 3.586921000  |
| C  | -0.058782000 | 2.270684000  | 4.070551000  |
| H  | 0.625136000  | 2.344411000  | 4.904574000  |
| C  | -0.474908000 | 1.024473000  | 3.437596000  |
| C  | -0.055012000 | -0.269905000 | 3.785967000  |
| C  | -0.431313000 | -1.464487000 | 3.184121000  |
| C  | 0.076611000  | -2.775536000 | 3.548122000  |
| H  | 0.789157000  | -2.955935000 | 4.339915000  |
| C  | -0.487996000 | -3.682093000 | 2.694572000  |
| H  | -0.333869000 | -4.751242000 | 2.656955000  |
| C  | -1.351758000 | -2.942807000 | 1.790206000  |
| C  | -2.077444000 | -3.519185000 | 0.732716000  |
| C  | -2.876073000 | -2.860926000 | -0.191930000 |
| C  | -3.626770000 | -3.463633000 | -1.286063000 |
| H  | -3.642820000 | -4.519136000 | -1.516700000 |
| C  | -4.272913000 | -2.446759000 | -1.933929000 |
| H  | -4.924294000 | -2.511525000 | -2.794311000 |
| C  | -3.919694000 | -1.210531000 | -1.244468000 |
| C  | -4.354130000 | 0.081525000  | -1.584321000 |
| C  | -4.032960000 | 1.273331000  | -0.946640000 |
| C  | -4.463122000 | 2.595883000  | -1.376948000 |
| H  | -5.102879000 | 2.784406000  | -2.226930000 |
| C  | -3.892540000 | 3.502182000  | -0.528976000 |
| H  | -3.979479000 | 4.579492000  | -0.543212000 |
| C  | -3.101706000 | 2.749545000  | 0.435470000  |
| C  | -2.315427000 | 3.327042000  | 1.448251000  |
| Fe | 0.458194000  | 0.187588000  | -1.021074000 |
| N  | 0.903074000  | 2.098640000  | -0.280562000 |
| N  | -0.739808000 | 1.024392000  | -2.471143000 |
| N  | 0.061794000  | -1.716871000 | -1.751304000 |
| N  | 1.706310000  | -0.634624000 | 0.417057000  |
| C  | 1.678946000  | 2.383123000  | 0.826929000  |
| C  | 1.677990000  | 3.821061000  | 1.040426000  |
| H  | 2.204292000  | 4.325739000  | 1.837789000  |
| C  | 0.890751000  | 4.372038000  | 0.064594000  |
| H  | 0.652881000  | 5.414996000  | -0.091187000 |
| C  | 0.395968000  | 3.274833000  | -0.754270000 |
| C  | -0.488341000 | 3.395150000  | -1.842884000 |
| C  | -1.008360000 | 2.373197000  | -2.626311000 |
| C  | -1.928345000 | 2.534600000  | -3.742475000 |
| H  | -2.310495000 | 3.483282000  | -4.091008000 |
| C  | -2.191783000 | 1.284978000  | -4.232440000 |
| H  | -2.829798000 | 1.013376000  | -5.061584000 |
| C  | -1.441163000 | 0.338703000  | -3.418891000 |
| C  | -1.445358000 | -1.060461000 | -3.581049000 |

|    |               |              |              |
|----|---------------|--------------|--------------|
| C  | -0.751902000  | -2.000065000 | -2.832331000 |
| C  | -0.746853000  | -3.440366000 | -3.051016000 |
| H  | -1.297784000  | -3.945189000 | -3.831276000 |
| C  | 0.074872000   | -3.987743000 | -2.106294000 |
| H  | 0.333250000   | -5.027738000 | -1.966565000 |
| C  | 0.578206000   | -2.889920000 | -1.292358000 |
| C  | 1.459213000   | -3.009935000 | -0.204176000 |
| C  | 1.978648000   | -1.984560000 | 0.575451000  |
| C  | 2.889427000   | -2.145509000 | 1.694822000  |
| H  | 3.278553000   | -3.093294000 | 2.037341000  |
| C  | 3.138037000   | -0.897411000 | 2.197608000  |
| H  | 3.776363000   | -0.626724000 | 3.026475000  |
| C  | 2.382572000   | 0.047123000  | 1.393122000  |
| C  | 2.355607000   | 1.438257000  | 1.587647000  |
| H  | -0.807103000  | 4.402505000  | -2.092276000 |
| H  | -2.055514000  | -1.444400000 | -4.392464000 |
| H  | 2.939826000   | 1.814646000  | 2.420930000  |
| H  | 1.780951000   | -4.015395000 | 0.046616000  |
| H  | -2.338131000  | 4.410745000  | 1.508202000  |
| H  | -5.003511000  | 0.161394000  | -2.450567000 |
| H  | 0.655725000   | -0.347761000 | 4.602703000  |
| H  | -1.985452000  | -4.595069000 | 0.622862000  |
| O  | -0.862981000  | 0.109022000  | 0.023840000  |
| O  | -3.774555000  | -0.220488000 | 2.257881000  |
| O  | 1.924687000   | 0.311999000  | -2.236844000 |
| C  | 3.032191000   | -0.446887000 | -2.143821000 |
| O  | 3.123944000   | -1.604936000 | -2.596497000 |
| C  | 4.181502000   | 0.207767000  | -1.437669000 |
| C  | 4.172961000   | 1.580768000  | -1.151993000 |
| C  | 5.257488000   | -0.593174000 | -1.020213000 |
| C  | 5.237716000   | 2.155851000  | -0.451210000 |
| H  | 3.321067000   | 2.169028000  | -1.466713000 |
| C  | 6.288135000   | 0.001634000  | -0.308300000 |
| H  | 5.251368000   | -1.650401000 | -1.252403000 |
| C  | 6.308679000   | 1.364092000  | -0.014147000 |
| H  | 5.233999000   | 3.218887000  | -0.232734000 |
| H  | 7.135383000   | 1.793325000  | 0.539154000  |
| Cl | 7.689052000   | -1.051638000 | 0.285653000  |
| H  | -3.719060000  | -1.008434000 | 3.035412000  |
| C  | -3.7111705000 | -2.048455000 | 4.057790000  |
| H  | -4.650248000  | -1.838499000 | 4.570394000  |
| H  | -2.801581000  | -1.828938000 | 4.613072000  |
| H  | -3.687485000  | -2.954924000 | 3.455164000  |

### 3-<sup>2</sup>ts1<sub>(hs, hs)</sub>

|    |              |              |              |
|----|--------------|--------------|--------------|
| Fe | 2.592410180  | -0.135656057 | 0.933414950  |
| N  | 2.717676944  | -1.953825334 | 0.021530629  |
| N  | 1.497219426  | -1.016367988 | 2.518923859  |
| N  | 2.294658065  | 1.706315746  | 1.750859744  |
| N  | 3.425917614  | 0.774206091  | -0.792503759 |
| C  | 3.270265667  | -2.207349264 | -1.217544122 |
| C  | 3.140202445  | -3.620658652 | -1.511744315 |
| H  | 3.488536714  | -4.093184513 | -2.419251827 |
| C  | 2.488284846  | -4.196454686 | -0.451556911 |
| H  | 2.204759354  | -5.231509626 | -0.323272262 |
| C  | 2.214269214  | -3.143630275 | 0.505547157  |
| C  | 1.517610901  | -3.322507257 | 1.707344604  |
| C  | 1.178114088  | -2.344889363 | 2.644224089  |
| C  | 0.421797058  | -2.539214314 | 3.872634114  |
| H  | 0.040388008  | -3.488020110 | 4.223201225  |
| C  | 0.298451185  | -1.308026658 | 4.463144509  |
| H  | -0.204300384 | -1.059151116 | 5.387209554  |
| C  | 0.976236100  | -0.353554106 | 3.598294949  |
| C  | 1.062078922  | 1.028810416  | 3.789953799  |
| C  | 1.656818496  | 1.970650746  | 2.943855963  |
| C  | 1.647797654  | 3.406062984  | 3.167476061  |
| H  | 1.210854480  | 3.890227760  | 4.029373812  |
| C  | 2.273267133  | 3.985187596  | 2.096090340  |
| H  | 2.446553446  | 5.035646706  | 1.909893128  |
| C  | 2.673484093  | 2.911996291  | 1.202810780  |
| C  | 3.299441913  | 3.097023995  | -0.034678693 |
| C  | 3.652847313  | 2.114608665  | -0.963623648 |
| C  | 4.291660574  | 2.330067368  | -2.253328830 |
| H  | 4.581950173  | 3.293504491  | -2.648453220 |

|    |              |              |              |
|----|--------------|--------------|--------------|
| C  | 4.440488420  | 1.097646718  | -2.835479790 |
| H  | 4.876379113  | 0.862409011  | -3.796432035 |
| C  | 3.892564538  | 0.122065980  | -1.904893583 |
| C  | 3.818915861  | -1.259875736 | -2.090309174 |
| Fe | -0.575559508 | 0.240357763  | -0.711428709 |
| N  | 0.195153354  | -0.478787111 | -2.496949578 |
| N  | -0.094748825 | 2.174233405  | -1.264250899 |
| N  | -1.459822867 | 0.944627502  | 1.024566652  |
| N  | -1.155301765 | -1.709326516 | -0.188241746 |
| C  | 0.260385243  | -1.796725547 | -2.880545218 |
| C  | 0.970385067  | -1.883133037 | -4.145269604 |
| H  | 1.162606835  | -2.801133975 | -4.682662674 |
| C  | 1.326925091  | -0.606592907 | -4.495088934 |
| H  | 1.865647063  | -0.280474161 | -5.373553659 |
| C  | 0.837091091  | 0.274973404  | -3.449462514 |
| C  | 1.003593564  | 1.662612918  | -3.406320127 |
| C  | 0.574153733  | 2.539478479  | -2.405848127 |
| C  | 0.785089997  | 3.977873430  | -2.386842795 |
| H  | 1.281194493  | 4.538015634  | -3.166777552 |
| C  | 0.238352529  | 4.448602009  | -1.222134306 |
| H  | 0.198244455  | 5.468656494  | -0.867322972 |
| C  | -0.313005840 | 3.304094587  | -0.516463506 |
| C  | -0.941051243 | 3.335594276  | 0.728916054  |
| C  | -1.463917746 | 2.253194027  | 1.442962957  |
| C  | -2.085276227 | 2.327314196  | 2.751582511  |
| H  | -2.230539033 | 3.239443637  | 3.312620008  |
| C  | -2.443398460 | 1.051374269  | 3.101917069  |
| H  | -2.936464653 | 0.719556914  | 4.004571089  |
| C  | -2.042436429 | 0.180845313  | 2.011807819  |
| C  | -2.207018946 | -1.205281074 | 1.975327462  |
| C  | -1.803532565 | -2.082135539 | 0.963017306  |
| C  | -1.990887146 | -3.521616102 | 0.955806784  |
| H  | -2.479645286 | -4.084431836 | 1.738590875  |
| C  | -1.442060053 | -3.992124898 | -0.210222306 |
| H  | -1.395946654 | -5.013600939 | -0.561340171 |
| C  | -0.916021302 | -2.843566672 | -0.927781647 |
| C  | -0.259124476 | -2.877932294 | -2.161638049 |
| H  | 1.540908443  | 2.107776632  | -4.237080925 |
| H  | -1.028844077 | 4.308449288  | 1.200473235  |
| H  | -0.126444126 | -3.858144066 | -2.608081574 |
| H  | -2.693605729 | -1.653343849 | 2.835188891  |
| H  | 4.202314588  | -1.645612268 | -3.029453182 |
| H  | 3.515979364  | 4.124338675  | -0.309274748 |
| H  | 1.182782257  | -4.333425539 | 1.916034532  |
| H  | 0.586675744  | 1.424051734  | 4.681892387  |
| O  | 0.890411293  | 0.036857338  | 0.050189913  |
| O  | 4.171248820  | -0.295826259 | 1.752695258  |
| O  | -2.267050369 | 0.365014655  | -1.603993144 |
| C  | -3.366582472 | 1.008984203  | -1.197731768 |
| O  | 3.441015358  | 2.237838081  | -0.987724353 |
| C  | -4.554448789 | 0.110457050  | -0.996435092 |
| C  | -4.439852027 | -1.284252989 | -1.110602136 |
| C  | -5.783234483 | 0.689557226  | -0.636878176 |
| C  | -5.549230874 | -2.099199442 | -0.862885884 |
| H  | -3.480363508 | -1.705047827 | -1.380996666 |
| C  | -6.865515148 | -0.145012474 | -0.400151942 |
| H  | -5.852083988 | 1.766286155  | -0.545553369 |
| C  | -6.780298508 | -1.532634767 | -0.503839361 |
| H  | -5.460617816 | -3.177798779 | -0.945368133 |
| H  | -7.648082149 | -2.151492706 | -0.309532267 |
| Cl | -8.487930206 | 0.606189520  | 0.079192047  |
| C  | 5.280562611  | -2.617841020 | 1.666013474  |
| H  | 4.642391290  | -1.290136885 | 1.678337743  |
| H  | 5.308743257  | -2.861093710 | 0.605434617  |
| H  | 6.236649478  | -2.387449237 | 2.135522327  |
| H  | 4.580600575  | -3.198581718 | 2.264707426  |

### 3-<sup>6</sup>ts1<sub>(is, is)</sub>

|    |             |              |              |
|----|-------------|--------------|--------------|
| Fe | 2.519402000 | -0.368659000 | 0.861733000  |
| N  | 3.456576000 | -0.236776000 | -0.924708000 |
| N  | 2.124899000 | -2.320313000 | 0.530830000  |
| N  | 1.459495000 | -0.473202000 | 2.575645000  |
| N  | 2.744761000 | 1.620308000  | 1.108487000  |
| C  | 3.953614000 | 0.888051000  | -1.524063000 |

|    |              |              |              |
|----|--------------|--------------|--------------|
| C  | 4.562618000  | 0.553458000  | -2.800177000 |
| H  | 5.028631000  | 1.268990000  | -3.462549000 |
| C  | 4.419405000  | -0.792572000 | -2.964418000 |
| H  | 4.735771000  | -1.409610000 | -3.792860000 |
| C  | 3.715841000  | -1.286509000 | -1.793796000 |
| C  | 3.315557000  | -2.592602000 | -1.608090000 |
| C  | 2.557808000  | -3.066883000 | -0.534261000 |
| C  | 2.070956000  | -4.428468000 | -0.422944000 |
| H  | 2.280644000  | -5.212943000 | -1.136085000 |
| C  | 1.317000000  | -4.489276000 | 0.713687000  |
| H  | 0.778774000  | -5.331408000 | 1.123281000  |
| C  | 1.350363000  | -3.169654000 | 1.310931000  |
| C  | 0.723335000  | -2.816503000 | 2.487759000  |
| C  | 0.793408000  | -1.558716000 | 3.086960000  |
| C  | 0.184386000  | -1.224104000 | 4.357887000  |
| H  | -0.391562000 | -1.911570000 | 4.960735000  |
| C  | 0.480550000  | 0.085549000  | 4.606066000  |
| H  | 0.188743000  | 0.695372000  | 5.448688000  |
| C  | 1.263931000  | 0.560293000  | 3.482856000  |
| C  | 1.689186000  | 1.862638000  | 3.315342000  |
| C  | 2.361701000  | 2.358333000  | 2.197278000  |
| C  | 2.723015000  | 3.751689000  | 2.012608000  |
| H  | 2.531663000  | 4.534448000  | 2.732727000  |
| C  | 3.316797000  | 3.847014000  | 0.787965000  |
| H  | 3.711115000  | 4.723401000  | 0.294911000  |
| C  | 3.336049000  | 2.511126000  | 0.224005000  |
| C  | 3.884852000  | 2.178588000  | -0.997004000 |
| Fe | -0.542978000 | 0.368251000  | -0.806095000 |
| N  | 0.185777000  | -0.307962000 | -2.559407000 |
| N  | 0.109445000  | 2.216840000  | -1.250194000 |
| N  | -1.305657000 | 1.037941000  | 0.934173000  |
| N  | -1.244014000 | -1.485402000 | -0.374694000 |
| C  | 0.168242000  | -1.601957000 | -3.011754000 |
| C  | 0.858468000  | -1.696124000 | -4.284276000 |
| H  | 0.977265000  | -2.610124000 | -4.848458000 |
| C  | 1.298399000  | -0.441554000 | -4.590845000 |
| H  | 1.856926000  | -0.113694000 | -5.455327000 |
| C  | 0.880228000  | 0.427202000  | -3.508834000 |
| C  | 1.147194000  | 1.777640000  | -3.433534000 |
| C  | 0.775722000  | 2.611421000  | -2.378787000 |
| C  | 1.072039000  | 4.030645000  | -2.315975000 |
| H  | 1.583152000  | 4.582806000  | -3.091586000 |
| C  | 0.585219000  | 4.483229000  | -1.125471000 |
| H  | 0.614320000  | 5.483402000  | -0.718912000 |
| C  | -0.016786000 | 3.346886000  | -0.456021000 |
| C  | -0.619360000 | 3.393649000  | 0.780105000  |
| C  | -1.227282000 | 2.315087000  | 1.420979000  |
| C  | -1.890150000 | 2.403591000  | 2.706455000  |
| H  | -1.973271000 | 3.309981000  | 3.288384000  |
| C  | -2.372958000 | 1.160385000  | 2.991044000  |
| H  | -2.928253000 | 0.832334000  | 3.857341000  |
| C  | -2.006705000 | 0.302544000  | 1.882539000  |
| C  | -2.315040000 | -1.036389000 | 1.789754000  |
| C  | -1.958470000 | -1.869903000 | 0.729310000  |
| C  | -2.286852000 | -3.278208000 | 0.649501000  |
| H  | -2.857001000 | -3.815899000 | 1.393410000  |
| C  | -1.742266000 | -3.745968000 | -0.511937000 |
| H  | -1.767903000 | -4.747999000 | -0.914953000 |
| C  | -1.088859000 | -2.623294000 | -1.153558000 |
| C  | -0.424817000 | -2.683201000 | -2.361173000 |
| H  | 1.694153000  | 2.227647000  | -4.254791000 |
| H  | -0.642342000 | 4.350026000  | 1.289848000  |
| H  | -0.364556000 | -3.649436000 | -2.850059000 |
| H  | -2.880584000 | -1.478140000 | 2.602446000  |
| H  | 4.310934000  | 2.981198000  | -1.589130000 |
| H  | 1.450130000  | 2.569817000  | 4.102516000  |
| H  | 3.577090000  | -3.308828000 | -2.379871000 |
| H  | 0.147047000  | -3.580025000 | 2.998519000  |
| O  | 0.923750000  | 0.011188000  | -0.063317000 |
| O  | 4.085148000  | -0.702708000 | 1.657302000  |
| O  | -2.201613000 | 0.734615000  | -1.690001000 |
| C  | -3.289112000 | 1.302810000  | -1.167419000 |
| O  | -3.367435000 | 2.500175000  | -0.814633000 |
| C  | -4.461120000 | 0.372927000  | -1.010353000 |
| C  | -4.374068000 | -0.977608000 | -1.382397000 |

|    |              |              |              |
|----|--------------|--------------|--------------|
| C  | -5.640552000 | 0.867029000  | -0.427917000 |
| C  | -5.458073000 | -1.834874000 | -1.167702000 |
| H  | -3.452246000 | -1.333839000 | -1.822706000 |
| C  | -6.697603000 | -0.007833000 | -0.225709000 |
| H  | -5.690015000 | 1.910828000  | -0.144390000 |
| C  | -6.637439000 | -1.354244000 | -0.581761000 |
| H  | -5.388600000 | -2.880484000 | -1.449950000 |
| H  | -7.484595000 | -2.006613000 | -0.407004000 |
| Cl | -8.251484000 | 0.628844000  | 0.555493000  |
| H  | 4.012458000  | -1.279652000 | 2.596695000  |
| C  | 3.915452000  | -2.078481000 | 3.825581000  |
| H  | 4.967855000  | -2.168943000 | 4.094404000  |
| H  | 3.306428000  | -1.451957000 | 4.475242000  |
| H  | 3.435328000  | -2.986180000 | 3.463177000  |

### 3-<sup>4</sup>ts1<sub>(is, is)</sub>

|    |              |              |              |
|----|--------------|--------------|--------------|
| Fe | -2.282124174 | -0.265365357 | 1.170446828  |
| N  | -3.498071969 | 0.114108892  | -0.396916220 |
| N  | -2.286539168 | 1.707417006  | 1.619082512  |
| N  | -0.946108743 | -0.620859594 | 2.637191307  |
| N  | -2.175091794 | -2.206680151 | 0.647069177  |
| C  | -4.033287279 | -0.810831639 | -1.252199697 |
| C  | -4.885284610 | -0.157951262 | -2.230145490 |
| H  | -5.425553579 | -0.672446036 | -3.012068376 |
| C  | -4.843971134 | 1.178625385  | -1.959987867 |
| H  | -5.341068314 | 1.987722957  | -2.474797917 |
| C  | -3.980186490 | 1.348639192  | -0.806852506 |
| C  | -3.705486791 | 2.554376528  | -0.196078488 |
| C  | -2.926598964 | 2.715539190  | 0.950910746  |
| C  | -2.687656343 | 3.987637708  | 1.610011535  |
| H  | -3.086877989 | 4.934817913  | 1.276298640  |
| C  | -1.890552330 | 3.730477605  | 2.686594739  |
| H  | -1.494435721 | 4.423654509  | 3.414430584  |
| C  | -1.631426756 | 2.301829750  | 2.686401267  |
| C  | -0.813116531 | 1.649160587  | 3.584694782  |
| C  | -0.478960910 | 0.293494702  | 3.546788873  |
| C  | 0.478735136  | -0.331533314 | 4.438630781  |
| H  | 0.983531423  | 0.177256232  | 5.247513412  |
| C  | 0.607955120  | -1.629829874 | 4.036663001  |
| H  | 1.241133119  | -2.403719644 | 4.444970456  |
| C  | -0.282741387 | -1.810966532 | 2.908649510  |
| C  | -0.466527540 | -2.995785471 | 2.226145830  |
| C  | -1.373067199 | -3.183029088 | 1.183196418  |
| C  | -1.620513418 | -4.452517842 | 0.529968528  |
| H  | -1.115884484 | -5.375912731 | 0.775816451  |
| C  | -2.577978072 | -4.230575807 | -0.417485968 |
| H  | -3.011918418 | -4.932079194 | -1.115093422 |
| C  | -2.912215683 | -2.821369909 | -0.358220352 |
| C  | -3.777275395 | -2.183164874 | -1.223428351 |
| Fe | 0.469242401  | 0.326608083  | -1.007494452 |
| N  | 0.964509580  | 1.987315543  | 0.040855520  |
| N  | -0.698849732 | 1.445261893  | -2.206024754 |
| N  | -0.016208759 | -1.329380045 | -2.033485618 |
| N  | 1.679590951  | -0.779246107 | 0.175994851  |
| C  | 1.741821248  | 2.044740853  | 1.168169292  |
| C  | 1.823057036  | 3.408533348  | 1.650523043  |
| H  | 2.381708130  | 3.715591648  | 2.523141603  |
| C  | 1.077717580  | 4.175367047  | 0.800916339  |
| H  | 0.891633157  | 5.238867751  | 0.838487696  |
| C  | 0.532444903  | 3.283611999  | -0.202188162 |
| C  | -0.313765662 | 3.664780043  | -1.222771563 |
| C  | -0.890255714 | 2.800703336  | -2.154199765 |
| C  | -1.818008257 | 3.214930136  | -3.189617932 |
| H  | -2.126788214 | 4.236251657  | -3.360982829 |
| C  | -2.196978956 | 2.085966470  | -3.855523247 |
| H  | -2.881231646 | 1.988305915  | -4.685538366 |
| C  | -1.493947830 | 0.977343351  | -3.240149115 |
| C  | -1.596184880 | -0.339416537 | -3.637254333 |
| C  | -0.892457833 | -1.407709147 | -3.082136164 |
| C  | -0.976631412 | -2.774684161 | -3.562156593 |
| H  | -1.596499841 | -3.094592272 | -4.387358734 |
| C  | -0.133072585 | -3.517968187 | -2.791133171 |
| H  | 0.080745633  | -4.575014083 | -2.848187675 |
| C  | 0.468474280  | -2.613624711 | -1.832318554 |



|    |              |              |              |    |              |              |              |
|----|--------------|--------------|--------------|----|--------------|--------------|--------------|
| C  | 1.377368013  | -2.982950165 | -0.867036846 | N  | -0.668891949 | 1.558241643  | -2.135546669 |
| C  | 1.945406229  | -2.120446808 | 0.071198585  | N  | -0.067875019 | -1.233668148 | -2.136084054 |
| C  | 2.876399114  | -2.529591649 | 1.102124013  | N  | 1.636922442  | -0.867899209 | 0.115776818  |
| H  | 3.260262111  | -3.533052210 | 1.216047551  | C  | 1.785796407  | 1.886188570  | 1.268981479  |
| C  | 3.146956186  | -1.423110237 | 1.853648662  | C  | 1.913735495  | 3.218214851  | 1.824938214  |
| H  | 3.800294156  | -1.331258820 | 2.708586674  | H  | 2.487177405  | 3.457851381  | 2.708917568  |
| C  | 2.393689137  | -0.327716511 | 1.280158316  | C  | 1.189956191  | 4.054255996  | 1.024388960  |
| C  | 2.405643928  | 0.965622017  | 1.752135024  | H  | 1.038968571  | 5.119569418  | 1.120944366  |
| H  | -0.568415382 | 4.716561525  | -1.296024421 | C  | 0.610760019  | 3.237625887  | -0.023321045 |
| H  | -2.263501691 | -0.561834772 | -4.462496130 | C  | -0.225371157 | 3.702426321  | -1.015986292 |
| H  | 3.003487296  | 1.169285380  | 2.633090617  | C  | -0.824996031 | 2.911880174  | -1.997049389 |
| H  | 1.678501333  | -4.023761448 | -0.832273472 | C  | -1.739426721 | 3.415178496  | -3.004417526 |
| H  | -4.272961910 | -2.794230614 | -1.970374273 | H  | -2.020559120 | 4.453243878  | -3.110027785 |
| H  | 0.118314315  | -3.853165646 | 2.539807744  | C  | -2.145083745 | 2.342175504  | -3.742643951 |
| H  | -4.147240223 | 3.446098704  | -0.627366797 | H  | -2.828591951 | 2.316298245  | -4.578604677 |
| H  | -0.356163697 | 2.246514540  | 4.366674380  | C  | -1.473465924 | 1.177910598  | -3.199789761 |
| O  | -0.839658553 | 0.088699428  | 0.050162868  | C  | -1.609918606 | -0.105980001 | -3.681822456 |
| O  | -3.707623879 | -0.496971550 | 2.230807067  | C  | -0.939207658 | -1.225899355 | -3.190449756 |
| O  | 1.914855705  | 0.648982931  | -2.220085274 | C  | -1.062782293 | -2.560726967 | -3.747634733 |
| C  | 3.019970347  | -0.106554298 | -2.242065080 | H  | -1.686809579 | -2.813952003 | -4.592629943 |
| O  | 3.124930750  | -1.189053309 | -2.855921781 | C  | -0.248787024 | -3.371912134 | -3.014754311 |
| C  | 4.160695279  | 0.434315649  | -1.427208937 | H  | -0.067485796 | -4.430384024 | -3.129352809 |
| C  | 4.157980219  | 1.756698416  | -0.960186430 | C  | 0.374788376  | -2.541678671 | -2.003084062 |
| C  | 5.211673914  | -0.431496033 | -1.083197878 | C  | 1.261567875  | -2.995662437 | -1.054354405 |
| C  | 5.199668179  | 2.215151078  | -0.147793894 | C  | 1.850630177  | -2.209344611 | -0.063896189 |
| H  | 3.325486054  | 2.395515068  | -1.224666679 | C  | 2.756545611  | -2.712361343 | 0.948759736  |
| C  | 6.218617499  | 0.044789668  | -0.257020817 | H  | 3.098387351  | -3.735521331 | 1.008157247  |
| H  | 5.202190190  | -1.447614615 | -1.455962095 | C  | 3.064878022  | -1.661751031 | 1.762696444  |
| C  | 6.242596795  | 1.353804459  | 0.221002204  | H  | 3.712983571  | -1.643985281 | 2.626312307  |
| H  | 5.198387983  | 3.239015570  | 0.212334233  | C  | 2.359084210  | -0.506660659 | 1.247308834  |
| H  | 7.049980251  | 1.690259371  | 0.860406027  | C  | 2.415084011  | 0.756221758  | 1.791234777  |
| Cl | 7.582068134  | -1.103835965 | 0.245286937  | H  | -0.451189446 | 4.763093980  | -1.025546091 |
| H  | -3.701606403 | -1.450419223 | -2.792461014 | H  | -2.280095012 | -0.257198886 | -4.520583551 |
| C  | -3.670259303 | -2.717598557 | 3.510588281  | H  | 3.017260653  | 0.890476715  | 2.682382706  |
| H  | -4.536632878 | -2.611856105 | 4.163547074  | H  | 1.525532758  | -4.046754030 | -1.076856191 |
| H  | -2.697296931 | -2.680816928 | 3.997201735  | H  | -4.284403024 | -2.662375202 | -2.118853265 |
| H  | -3.765219711 | -3.444161307 | 2.705089749  | H  | 0.006522177  | -3.983927895 | 2.419835419  |
|    |              |              |              | H  | -4.092827255 | 3.512364062  | -0.513730708 |
|    |              |              |              | H  | -0.308984491 | 2.069670388  | 4.421220696  |
|    |              |              |              | O  | -0.832939029 | 0.045025956  | 0.029174592  |
|    |              |              |              | O  | -3.728665908 | -0.550220713 | 2.193357664  |
|    |              |              |              | O  | 1.927571411  | 0.679828879  | -2.179384919 |
|    |              |              |              | C  | 3.034610147  | -0.069632323 | -2.211357147 |
|    |              |              |              | O  | 3.143908099  | -1.145679952 | -2.836897964 |
|    |              |              |              | C  | 4.175851990  | 0.465918030  | -1.392844156 |
|    |              |              |              | C  | 4.160278177  | 1.775446012  | -0.890848155 |
|    |              |              |              | C  | 5.242163430  | -0.394082139 | -1.082299435 |
|    |              |              |              | C  | 5.204379174  | 2.226757813  | -0.077301226 |
|    |              |              |              | H  | 3.316715782  | 2.409716989  | -1.129977676 |
|    |              |              |              | C  | 6.252579459  | 0.074930408  | -0.256088185 |
|    |              |              |              | H  | 5.241894613  | -1.400266370 | -1.481439286 |
|    |              |              |              | C  | 6.263838023  | 1.371230631  | 0.256187031  |
|    |              |              |              | H  | 5.192302582  | 3.240330327  | 0.310603676  |
|    |              |              |              | H  | 7.074174288  | 1.702349319  | 0.894688219  |
|    |              |              |              | Cl | 7.639623621  | -1.065678671 | 0.197996178  |
|    |              |              |              | H  | -3.641224459 | -1.409061566 | 2.876184295  |
|    |              |              |              | C  | -3.527182279 | -2.551198200 | 3.798099615  |
|    |              |              |              | H  | -4.514360453 | -2.538152187 | 4.259751857  |
|    |              |              |              | H  | -2.696120163 | -2.248772180 | 4.433474938  |
|    |              |              |              | H  | -3.326042293 | -3.378386083 | 3.119473620  |

### 3<sup>-2</sup>ts1(is, is)

|    |              |              |              |
|----|--------------|--------------|--------------|
| Fe | -2.297499588 | -0.294221968 | 1.148566804  |
| N  | -3.500507259 | 0.164146505  | -0.406888617 |
| N  | -2.246619015 | 1.662016673  | 1.654558692  |
| N  | -0.975605538 | -0.730301329 | 2.612031003  |
| N  | -2.219709389 | -2.221216560 | 0.552348487  |
| C  | -4.039769806 | -0.717661395 | -1.303555021 |
| C  | -4.881737022 | -0.015234614 | -2.256893505 |
| H  | -5.423983933 | -0.491011629 | -3.061651586 |
| C  | -4.828927461 | 1.307844637  | -1.930216207 |
| H  | -5.316237518 | 2.142889046  | -2.412023260 |
| C  | -3.965422593 | 1.420212135  | -0.768955742 |
| C  | -3.666080634 | 2.597565414  | -0.117267138 |
| C  | -2.871402014 | 2.704051143  | 1.026292744  |
| C  | -2.602123096 | 3.948736206  | 1.725180243  |
| H  | -2.984804857 | 4.914126464  | 1.426025506  |
| C  | -1.803472308 | 3.640297102  | 2.786868902  |
| H  | -1.388829881 | 4.300715569  | 3.534577463  |
| C  | -1.575111624 | 2.206994392  | 2.739693110  |
| C  | -0.779627956 | 1.507164550  | 3.621782677  |
| C  | -0.488244845 | 0.141788362  | 3.550367699  |
| C  | 0.440497026  | -0.537964031 | 4.433911599  |
| H  | 0.953608741  | -0.068330393 | 5.261052301  |
| C  | 0.532839690  | -1.827699582 | 3.995806633  |
| H  | 1.137013537  | -2.632692253 | 4.387899775  |
| C  | -0.350785717 | -1.947663662 | 2.853373533  |
| C  | -0.553823420 | -3.102617234 | 2.128201990  |
| C  | -1.445290945 | -3.231780309 | 1.061831626  |
| C  | -1.693811108 | -4.467559610 | 0.344865095  |
| H  | -1.207986493 | -5.408685789 | 0.559595945  |
| C  | -2.624562661 | -4.187918766 | -0.613689449 |
| H  | -3.052951282 | -4.850297919 | -1.351818256 |
| C  | -2.943840612 | -2.778341358 | -0.494008674 |
| C  | -3.792916149 | -2.091952153 | -1.337845357 |
| Fe | 0.450622177  | 0.340054170  | -0.997974951 |
| N  | 1.001858138  | 1.916384927  | 0.145274759  |

### 3<sup>-12</sup>int1(hs, hs)

|    |             |              |              |
|----|-------------|--------------|--------------|
| Fe | 2.481805000 | -0.270208000 | 1.292633000  |
| N  | 2.404531000 | -2.164196000 | 0.380145000  |
| N  | 0.971092000 | -0.899649000 | 2.608864000  |
| N  | 2.131011000 | 1.698121000  | 1.873264000  |
| N  | 3.537997000 | 0.441771000  | -0.373119000 |
| C  | 3.080115000 | -2.543385000 | -0.750377000 |
| C  | 2.818300000 | -3.950262000 | -1.011778000 |
| H  | 3.230610000 | -4.510882000 | -1.839087000 |
| C  | 1.956721000 | -4.387083000 | -0.040854000 |
| H  | 1.526853000 | -5.371360000 | 0.075947000  |
| C  | 1.682745000 | -3.256627000 | 0.829761000  |
| C  | 0.817501000 | -3.259199000 | 1.919205000  |

|    |              |              |              |
|----|--------------|--------------|--------------|
| C  | 0.478773000  | -2.170662000 | 2.738532000  |
| C  | -0.481819000 | -2.201535000 | 3.832835000  |
| H  | -1.020998000 | -3.081231000 | 4.155414000  |
| C  | -0.564697000 | -0.930406000 | 4.330965000  |
| H  | -1.189023000 | -0.567428000 | 5.134485000  |
| C  | 0.344241000  | -0.103598000 | 3.550475000  |
| C  | 0.528890000  | 1.266617000  | 3.697061000  |
| C  | 1.344302000  | 2.103962000  | 2.917930000  |
| C  | 1.451909000  | 3.547978000  | 3.063752000  |
| H  | 0.938715000  | 4.131416000  | 3.815189000  |
| C  | 2.292490000  | 3.990512000  | 2.079353000  |
| H  | 2.594363000  | 5.005665000  | 1.865913000  |
| C  | 2.713897000  | 2.824803000  | 1.318198000  |
| C  | 3.532987000  | 2.838249000  | 0.195785000  |
| C  | 3.907012000  | 1.739704000  | -0.596246000 |
| C  | 4.722563000  | 1.804891000  | -1.801281000 |
| H  | 5.152428000  | 2.710276000  | -2.206360000 |
| C  | 4.814496000  | 0.532182000  | -2.293765000 |
| H  | 5.326651000  | 0.195558000  | -3.183631000 |
| C  | 4.057941000  | -0.329954000 | -1.397560000 |
| C  | 3.858365000  | -1.695978000 | -1.557192000 |
| Fe | -0.468852000 | 0.372373000  | -0.926451000 |
| N  | 0.700870000  | 0.197170000  | -2.620266000 |
| N  | -0.089699000 | 2.406528000  | -0.837054000 |
| N  | -1.742665000 | 0.548728000  | 0.715414000  |
| N  | -0.935156000 | -1.659893000 | -1.035318000 |
| C  | 0.954742000  | -0.948704000 | -3.317732000 |
| C  | 1.858346000  | -0.645794000 | -4.417713000 |
| H  | 2.220776000  | -1.368328000 | -5.135359000 |
| C  | 2.136580000  | 0.692595000  | -4.351740000 |
| H  | 2.774322000  | 1.274830000  | -5.001002000 |
| C  | 1.405123000  | 1.227055000  | -3.213946000 |
| C  | 1.402140000  | 2.551083000  | -2.788644000 |
| C  | 0.701129000  | 3.103613000  | -1.701755000 |
| C  | 0.703165000  | 4.509657000  | -1.319133000 |
| H  | 1.242484000  | 5.288922000  | -1.838816000 |
| C  | -0.097909000 | 4.626205000  | -0.217869000 |
| H  | -0.341048000 | 5.518319000  | 0.340565000  |
| C  | -0.603287000 | 3.296114000  | 0.086178000  |
| C  | -1.470066000 | 2.964167000  | 1.116263000  |
| C  | -2.007292000 | 1.696342000  | 1.407471000  |
| C  | -2.926532000 | 1.399602000  | 2.493751000  |
| H  | -3.314786000 | 2.130325000  | 3.188805000  |
| C  | -3.188586000 | 0.057594000  | 2.444203000  |
| H  | -3.830995000 | -0.521757000 | 3.091071000  |
| C  | -2.437095000 | -0.484493000 | 1.325603000  |
| C  | -2.417719000 | -1.811074000 | 0.922264000  |
| C  | -1.726161000 | -2.361758000 | -0.172211000 |
| C  | -1.759906000 | -3.756890000 | -0.578883000 |
| H  | -2.318735000 | -4.532968000 | -0.075058000 |
| C  | -0.965440000 | -3.870659000 | -1.688558000 |
| H  | -0.743392000 | -4.758784000 | -2.262693000 |
| C  | -0.438563000 | -2.546403000 | -1.975309000 |
| C  | 0.426635000  | -2.215772000 | -3.012505000 |
| H  | 2.003380000  | 3.243162000  | -3.370021000 |
| H  | -1.789426000 | 3.776983000  | 1.760348000  |
| H  | 0.730739000  | -3.029917000 | -3.663317000 |
| H  | -3.018364000 | -2.500709000 | 1.506331000  |
| H  | 4.324642000  | -2.154362000 | -2.423739000 |
| H  | 3.903203000  | 3.808102000  | -0.121006000 |
| H  | 0.323976000  | -4.200331000 | 2.140351000  |
| H  | -0.043958000 | 1.750074000  | 4.482060000  |
| O  | 0.838860000  | 0.040767000  | 0.049989000  |
| O  | 3.926525000  | -0.618278000 | 2.383472000  |
| O  | -1.967010000 | 0.769211000  | -2.101513000 |
| C  | -3.119381000 | 1.301178000  | -1.681655000 |
| O  | -3.306477000 | 2.520919000  | -1.485143000 |
| C  | -4.210921000 | 0.301326000  | -1.421113000 |
| C  | -4.105557000 | -1.023582000 | -1.868619000 |
| C  | -5.323898000 | 0.702104000  | -0.663599000 |
| C  | -5.106279000 | -1.949833000 | -1.558315000 |
| H  | -3.228296000 | -1.309368000 | -2.434319000 |
| C  | -6.289933000 | -0.243737000 | -0.354255000 |
| H  | -5.392687000 | 1.729399000  | -0.329369000 |
| C  | -6.211582000 | -1.566894000 | -0.785618000 |

|    |              |              |              |
|----|--------------|--------------|--------------|
| H  | -5.025093000 | -2.974930000 | -1.905390000 |
| H  | -6.989456000 | -2.275451000 | -0.527260000 |
| Cl | -7.737966000 | 0.261872000  | 0.683838000  |
| H  | 4.380066000  | -1.469995000 | 2.550980000  |
| C  | 4.532727000  | -3.730765000 | 2.546574000  |
| H  | 4.435957000  | -3.739268000 | 1.467119000  |
| H  | 5.495794000  | -3.908001000 | 3.013736000  |
| H  | 3.641627000  | -3.631999000 | 3.156592000  |

### 3-<sup>10</sup>int1<sub>(hs, hs)</sub>

|    |              |              |              |
|----|--------------|--------------|--------------|
| Fe | 2.478732000  | -0.270953000 | 1.293998000  |
| N  | 2.398755000  | -2.164418000 | 0.382851000  |
| N  | 0.966489000  | -0.896221000 | 2.610528000  |
| N  | 2.133560000  | 1.698385000  | 1.875156000  |
| N  | 3.536169000  | 0.438591000  | -0.372697000 |
| C  | 3.077437000  | -2.547262000 | -0.744508000 |
| C  | 2.826367000  | -3.958038000 | -0.994855000 |
| H  | 3.242432000  | -4.522048000 | -1.817996000 |
| C  | 1.969678000  | -4.394397000 | -0.019102000 |
| H  | 1.547989000  | -5.381327000 | 0.105473000  |
| C  | 1.687451000  | -3.259500000 | 0.842948000  |
| C  | 0.822932000  | -3.259872000 | 1.933191000  |
| C  | 0.478453000  | -2.168141000 | 2.745949000  |
| C  | -0.482344000 | -2.197176000 | 3.840219000  |
| H  | -1.018959000 | -3.077036000 | 4.166644000  |
| C  | -0.568993000 | -0.924156000 | 4.332892000  |
| H  | -1.194157000 | -0.559636000 | 5.135070000  |
| C  | 0.338390000  | -0.098321000 | 3.549477000  |
| C  | 0.523277000  | 1.272220000  | 3.693212000  |
| C  | 1.341923000  | 2.107190000  | 2.914985000  |
| C  | 1.446729000  | 3.552009000  | 3.055484000  |
| H  | 0.929662000  | 4.137570000  | 3.802603000  |
| C  | 2.289673000  | 3.992108000  | 2.072071000  |
| H  | 2.589909000  | 5.006987000  | 1.855054000  |
| C  | 2.715122000  | 2.824081000  | 1.316646000  |
| C  | 3.533455000  | 2.835502000  | 0.193498000  |
| C  | 3.906002000  | 1.735938000  | -0.597718000 |
| C  | 4.719726000  | 1.799238000  | -1.804127000 |
| H  | 5.149784000  | 2.703802000  | -2.210836000 |
| C  | 4.809756000  | 0.525924000  | -2.295414000 |
| H  | 5.319991000  | 0.187998000  | -3.185888000 |
| C  | 4.053688000  | -0.334599000 | -1.397157000 |
| C  | 3.853674000  | -1.700891000 | -1.554422000 |
| Fe | -0.471399000 | 0.374455000  | -0.925741000 |
| N  | 0.699334000  | 0.196103000  | -2.618577000 |
| N  | -0.098337000 | 2.409858000  | -0.843885000 |
| N  | -1.746399000 | 0.552959000  | 0.715165000  |
| N  | -0.930825000 | -1.659949000 | -1.026324000 |
| C  | 0.956427000  | -0.951522000 | -3.311885000 |
| C  | 1.858391000  | -0.649858000 | -4.413562000 |
| H  | 2.222653000  | -1.373908000 | -5.128755000 |
| C  | 2.132677000  | 0.689575000  | -4.352565000 |
| H  | 2.768357000  | 1.271349000  | -5.004268000 |
| C  | 1.400368000  | 1.225930000  | -3.216184000 |
| C  | 1.394614000  | 2.551239000  | -2.794905000 |
| C  | 0.692492000  | 3.105649000  | -1.709680000 |
| C  | 0.692746000  | 4.512645000  | -1.330389000 |
| H  | 1.231621000  | 5.291263000  | -1.851514000 |
| C  | -0.109503000 | 4.631035000  | -0.230139000 |
| H  | -0.354058000 | 5.524276000  | 0.325901000  |
| C  | -0.613660000 | 3.301131000  | 0.076743000  |
| C  | -1.480342000 | 2.970536000  | 1.107388000  |
| C  | -2.014553000 | 1.702384000  | 1.402791000  |
| C  | -2.933328000 | 1.407105000  | 2.489888000  |
| H  | -3.323920000 | 2.139306000  | 3.182080000  |
| C  | -3.191528000 | 0.064168000  | 2.445280000  |
| H  | -3.832438000 | -0.514613000 | 3.094142000  |
| C  | -2.438057000 | -0.479934000 | 1.328994000  |
| C  | -2.414395000 | -1.807998000 | 0.930730000  |
| C  | -1.720212000 | -2.360842000 | -0.160958000 |
| C  | -1.748849000 | -3.757816000 | -0.561758000 |
| H  | -2.305399000 | -4.533645000 | -0.055041000 |
| C  | -0.953092000 | -3.873576000 | -1.670248000 |
| H  | -0.727440000 | -4.763353000 | -2.240390000 |

|    |              |              |              |
|----|--------------|--------------|--------------|
| C  | -0.430565000 | -2.548680000 | -1.962242000 |
| C  | 0.433175000  | -2.219264000 | -3.001061000 |
| H  | 1.994469000  | 3.242792000  | -3.378358000 |
| H  | -1.801777000 | 3.784693000  | 1.748772000  |
| H  | 0.739850000  | -3.034996000 | -3.648677000 |
| H  | -3.013183000 | -2.497237000 | 1.517153000  |
| H  | 4.320562000  | -2.161085000 | -2.419699000 |
| H  | 3.902788000  | 3.804971000  | -0.125563000 |
| H  | 0.334913000  | -4.202419000 | 2.160732000  |
| H  | -0.051693000 | 1.757921000  | 4.475279000  |
| O  | 0.837112000  | 0.051305000  | 0.052166000  |
| O  | 3.915286000  | -0.648298000 | 2.373104000  |
| O  | -1.971557000 | 0.760814000  | -2.102582000 |
| C  | -3.125529000 | 1.290779000  | -1.685143000 |
| O  | -3.316371000 | 2.510547000  | -1.492053000 |
| C  | -4.214477000 | 0.288573000  | -1.422294000 |
| C  | -4.104623000 | -1.037704000 | -1.864683000 |
| C  | -5.329554000 | 0.688812000  | -0.667595000 |
| C  | -5.102977000 | -1.965776000 | -1.552157000 |
| H  | -3.225853000 | -1.322997000 | -2.428309000 |
| C  | -6.293170000 | -0.258742000 | -0.355955000 |
| H  | -5.401810000 | 1.717143000  | -0.337297000 |
| C  | -6.210403000 | -1.583252000 | -0.782287000 |
| H  | -5.018330000 | -2.991914000 | -1.895320000 |
| H  | -6.986513000 | -2.293138000 | -0.522269000 |
| Cl | -7.744050000 | 0.246439000  | 0.678466000  |
| H  | 4.367981000  | -1.509166000 | 2.525597000  |
| C  | 4.642866000  | -3.601788000 | 2.492428000  |
| H  | 4.500902000  | -3.637648000 | 1.418564000  |
| H  | 5.641770000  | -3.636416000 | 2.914900000  |
| H  | 3.777106000  | -3.668062000 | 3.142103000  |

### 3-<sup>4</sup>int1<sub>(hs, hs)</sub>

|    |              |              |              |
|----|--------------|--------------|--------------|
| Fe | 2.749215845  | -0.132210247 | 1.059530515  |
| N  | 2.782289539  | -1.932783600 | -0.029196218 |
| N  | 1.510308281  | -1.074825865 | 2.474174573  |
| N  | 2.224981159  | 1.716135392  | 1.872671901  |
| N  | 3.470356316  | 0.859258099  | -0.645415789 |
| C  | 3.354088121  | -2.114643421 | -1.272082680 |
| C  | 3.218561790  | -3.509341413 | -1.652471426 |
| H  | 3.580538523  | -3.934196823 | -2.578347480 |
| C  | 2.542488858  | -4.140240224 | -0.638413329 |
| H  | 2.249356592  | -5.178877747 | -0.577393044 |
| C  | 2.260337237  | -3.139960712 | 0.373360179  |
| C  | 1.537758171  | -3.359411956 | 1.553001111  |
| C  | 1.180089195  | -2.412436622 | 2.512906601  |
| C  | 0.350544060  | -2.660061676 | 3.681431399  |
| H  | -0.051690373 | -3.624365454 | 3.958907606  |
| C  | 0.184438308  | -1.458050673 | 4.318675903  |
| H  | -0.382117018 | -1.250283938 | 5.215455965  |
| C  | 0.906738771  | -0.461861669 | 3.545240093  |
| C  | 0.926380333  | 0.913086040  | 3.809302716  |
| C  | 1.512206906  | 1.916099880  | 3.035518220  |
| C  | 1.407922379  | 3.343964796  | 3.284317466  |
| H  | 0.903217710  | 3.787204909  | 4.131285994  |
| C  | 2.048583087  | 3.980502785  | 2.252724483  |
| H  | 2.164888023  | 5.043277077  | 2.093661025  |
| C  | 2.550840857  | 2.949642934  | 1.361594594  |
| C  | 3.207342438  | 3.176919112  | 0.145849880  |
| C  | 3.620110519  | 2.221403899  | -0.783898898 |
| C  | 4.229745698  | 2.500951809  | -2.073863345 |
| H  | 4.463466651  | 3.489289405  | -2.444267210 |
| C  | 4.429393637  | 1.295069764  | -2.694210150 |
| H  | 4.855001469  | 1.108852973  | -3.670272691 |
| C  | 3.941241140  | 0.265699039  | -1.791740591 |
| C  | 3.902815532  | -1.106070617 | -2.067149165 |
| Fe | -0.570399458 | 0.284540564  | -0.740084202 |
| N  | 0.277487417  | -0.243746276 | -2.555717723 |
| N  | -0.172676294 | 2.283181480  | -1.113703358 |
| N  | -1.548102851 | 0.807669852  | 1.020745130  |
| N  | -1.082302758 | -1.718568554 | -0.401089002 |
| C  | 0.412470398  | -1.518845127 | -3.048027103 |
| C  | 1.154043228  | -1.466026676 | -4.296294531 |
| H  | 1.401323772  | -2.324861502 | -4.904195432 |

|    |              |              |              |
|----|--------------|--------------|--------------|
| C  | 1.456950847  | -0.149274934 | -4.527824786 |
| H  | 1.999280781  | 0.274616594  | -5.361019249 |
| C  | 0.902676304  | 0.615629090  | -3.424088740 |
| C  | 0.995068709  | 2.003076474  | -3.260056853 |
| C  | 0.496513627  | 2.775159061  | -2.205982378 |
| C  | 0.616255339  | 4.218726142  | -2.075320916 |
| H  | 1.092601976  | 4.866370826  | -2.797624535 |
| C  | 0.011810118  | 4.565283275  | -0.896277048 |
| H  | -0.102504764 | 5.551024732  | -0.468563814 |
| C  | -0.482361444 | 3.337959153  | -0.294451375 |
| C  | -1.154168791 | 3.235884587  | 0.925381209  |
| C  | -1.643353782 | 2.075594289  | 1.536540296  |
| C  | -2.325173891 | 2.016852985  | 2.816090762  |
| H  | -2.545239659 | 2.873593607  | 3.436827286  |
| C  | -2.628554833 | 0.701011987  | 3.050743835  |
| H  | -3.142465466 | 0.274928358  | 3.900532969  |
| C  | -2.133835479 | -0.058226389 | 1.916658554  |
| C  | -2.230118618 | -1.442282943 | 1.755439334  |
| C  | -1.754026108 | -2.213531097 | 0.688362613  |
| C  | -1.886376804 | -3.652177274 | 0.551285079  |
| H  | -2.379886384 | -4.297997207 | 1.263746286  |
| C  | -1.280581320 | -3.999693318 | -0.629579117 |
| H  | -1.182482118 | -4.984303575 | -1.064726178 |
| C  | -0.775549725 | -2.775108429 | -1.225000394 |
| C  | -0.078546451 | -2.676393266 | -2.434675825 |
| H  | 1.523359925  | 2.541748766  | -4.039892940 |
| H  | -1.317984753 | 4.163955408  | 1.462668020  |
| H  | 0.109418892  | -3.609748049 | -2.955561295 |
| H  | -2.729858647 | -1.982913101 | 2.552316764  |
| H  | 4.297516195  | -1.414135793 | -3.029921060 |
| H  | 3.376899576  | 4.214976699  | -0.120809391 |
| H  | 1.180438663  | -4.371084887 | 1.715342917  |
| H  | 0.379842429  | 1.240690277  | 4.687599940  |
| O  | 0.872823822  | 0.092483852  | 0.045140558  |
| O  | 4.363258065  | -0.369941047 | 1.925760106  |
| O  | -2.260473320 | 0.438727219  | -1.681482066 |
| C  | -3.378017172 | 1.024932123  | -1.252517108 |
| O  | -3.501436679 | 2.246539634  | -1.013209927 |
| C  | -4.529543591 | 0.077971272  | -1.049675171 |
| C  | -4.378938042 | -1.302779443 | -1.253430235 |
| C  | -5.756417579 | 0.592799415  | -0.598277648 |
| C  | -5.448499075 | -2.168447359 | -1.002842397 |
| H  | -3.421186806 | -1.672529086 | -1.595095658 |
| C  | -6.798445900 | -0.290733949 | -0.358230558 |
| H  | -5.854196940 | 1.659766923  | -0.442289585 |
| C  | -6.676290042 | -1.666192675 | -0.549237655 |
| H  | -5.331387069 | -3.236515086 | -1.156425970 |
| H  | -7.513667953 | -2.324237142 | -0.350260054 |
| Cl | -8.416793808 | 0.375189909  | 0.246444777  |
| H  | 4.884575016  | -1.197041224 | 1.996238080  |
| C  | 5.311108256  | -3.383497607 | 1.726778528  |
| H  | 5.126666209  | -3.255365803 | 0.666457062  |
| H  | 6.325434943  | -3.469483068 | 2.102118537  |
| H  | 4.468997591  | -3.511477410 | 2.397885232  |

### 3-<sup>2</sup>int1<sub>(hs, hs)</sub>

|    |              |              |              |
|----|--------------|--------------|--------------|
| Fe | 2.492362000  | -0.282264000 | 1.297542000  |
| N  | 2.435395000  | -2.156122000 | 0.343903000  |
| N  | 0.985620000  | -0.956189000 | 2.600635000  |
| N  | 2.113717000  | 1.672863000  | 1.917858000  |
| N  | 3.532321000  | 0.479896000  | -0.358724000 |
| C  | 3.115334000  | -2.504554000 | -0.793645000 |
| C  | 2.879899000  | -3.911815000 | -1.077331000 |
| H  | 3.299154000  | -4.451074000 | -1.915295000 |
| C  | 2.030364000  | -4.381085000 | -0.110596000 |
| H  | 1.619719000  | -5.375344000 | -0.009364000 |
| C  | 1.737454000  | -3.270167000 | 0.779207000  |
| C  | 0.871860000  | -3.304833000 | 1.867995000  |
| C  | 0.512020000  | -2.235796000 | 2.705677000  |
| C  | -0.455248000 | -2.300465000 | 3.793034000  |
| H  | -0.984021000 | -3.193236000 | 4.096381000  |
| C  | -0.560689000 | -1.039303000 | 4.312098000  |
| H  | -1.195702000 | -0.699649000 | 5.117491000  |
| C  | 0.342011000  | -0.186112000 | 3.552309000  |

|    |              |              |              |
|----|--------------|--------------|--------------|
| C  | 0.506411000  | 1.184043000  | 3.722674000  |
| C  | 1.314259000  | 2.048111000  | 2.963365000  |
| C  | 1.392720000  | 3.492076000  | 3.131088000  |
| H  | 0.863604000  | 4.054609000  | 3.887390000  |
| C  | 2.228964000  | 3.965247000  | 2.157417000  |
| H  | 2.510808000  | 4.989215000  | 1.959220000  |
| C  | 2.676037000  | 2.818447000  | 1.381345000  |
| C  | 3.492574000  | 2.864323000  | 0.257506000  |
| C  | 3.881744000  | 1.786929000  | -0.557255000 |
| C  | 4.690104000  | 1.888856000  | -1.764861000 |
| H  | 5.103727000  | 2.808565000  | -2.154251000 |
| C  | 4.797753000  | 0.627974000  | -2.283733000 |
| H  | 5.309401000  | 0.317276000  | -3.183264000 |
| C  | 4.058472000  | -0.263260000 | -1.401077000 |
| C  | 3.877238000  | -1.628672000 | -1.586972000 |
| Fe | -0.482149000 | -0.387002000 | -0.927354000 |
| N  | 0.693917000  | 0.233972000  | -2.618625000 |
| N  | -0.117981000 | 2.420612000  | -0.818220000 |
| N  | -1.759167000 | 0.537240000  | 0.715104000  |
| N  | -0.929759000 | -1.649420000 | -1.052267000 |
| C  | 0.955607000  | -0.902474000 | -3.326244000 |
| C  | 1.854809000  | -0.582294000 | -4.425817000 |
| H  | 2.221452000  | -1.295633000 | -5.150505000 |
| C  | 2.121634000  | 0.757512000  | -4.348682000 |
| H  | 2.752160000  | 1.351292000  | -4.994599000 |
| C  | 1.387354000  | 1.276018000  | -3.204444000 |
| C  | 1.373895000  | 2.595286000  | -2.768286000 |
| C  | 0.666689000  | 3.131278000  | -1.676187000 |
| C  | 0.657384000  | 4.534345000  | -1.280730000 |
| H  | 1.190864000  | 5.322291000  | -1.793348000 |
| C  | -0.144747000 | 4.634601000  | -0.178928000 |
| H  | -0.396264000 | 5.519811000  | 0.386828000  |
| C  | -0.640541000 | 3.297623000  | 0.112808000  |
| C  | -1.504280000 | 2.950915000  | 1.139436000  |
| C  | -2.030120000 | 1.675248000  | 1.419213000  |
| C  | -2.941438000 | 1.359638000  | 2.507883000  |
| H  | -3.332565000 | 2.080410000  | 3.211703000  |
| C  | -3.190289000 | 0.015937000  | 2.447779000  |
| H  | -3.823865000 | -0.575645000 | 3.092349000  |
| C  | -2.439368000 | -0.509242000 | 1.319650000  |
| C  | -2.408005000 | -1.831522000 | 0.906592000  |
| C  | -1.712337000 | -2.365265000 | -0.194464000 |
| C  | -1.730688000 | -3.758816000 | -0.610653000 |
| H  | -2.280623000 | -4.544206000 | -0.111464000 |
| C  | -0.934908000 | -3.856416000 | -1.720341000 |
| H  | -0.703276000 | -4.737908000 | -2.300912000 |
| C  | -0.422505000 | -2.523654000 | -1.998628000 |
| C  | 0.439569000  | -2.178119000 | -3.032075000 |
| H  | 1.969337000  | 3.297901000  | -3.342793000 |
| H  | -1.828742000 | 3.754806000  | 1.791972000  |
| H  | 0.752449000  | -2.984065000 | -3.688743000 |
| H  | -2.998023000 | -2.532690000 | 1.487562000  |
| H  | 4.347164000  | -2.063023000 | -2.463933000 |
| H  | 3.845227000  | 3.845814000  | -0.043311000 |
| H  | 0.394132000  | -4.257858000 | 2.072925000  |
| H  | -0.079210000 | 1.645991000  | 4.511270000  |
| O  | 0.812292000  | 0.053449000  | 0.049743000  |
| O  | 3.937759000  | -0.654656000 | 2.371562000  |
| O  | -1.973475000 | 0.777714000  | -2.099083000 |
| C  | -3.129074000 | 1.299223000  | -1.666038000 |
| O  | -3.320825000 | 2.516226000  | -1.462154000 |
| C  | -4.213392000 | 0.291572000  | -1.411997000 |
| C  | -4.101288000 | -1.028764000 | -1.871306000 |
| C  | -5.327697000 | 0.680127000  | -0.649923000 |
| C  | -5.097081000 | -1.962708000 | -1.568213000 |
| H  | -3.223079000 | -1.305235000 | -2.440054000 |
| C  | -6.288476000 | -0.273370000 | -0.347953000 |
| H  | -5.401975000 | 1.703856000  | -0.306114000 |
| C  | -6.203544000 | -1.592209000 | -0.791256000 |
| H  | -5.010830000 | -2.984260000 | -1.924258000 |
| H  | -6.977432000 | -2.307058000 | -0.538277000 |
| Cl | -7.737642000 | 0.215559000  | 0.695876000  |
| H  | 4.399260000  | -1.514937000 | 2.499813000  |
| C  | 4.699533000  | -3.605628000 | 2.425567000  |
| H  | 4.554634000  | -3.622198000 | 1.351625000  |

|   |             |              |             |
|---|-------------|--------------|-------------|
| H | 5.700030000 | -3.637629000 | 2.844405000 |
| H | 3.836573000 | -3.692426000 | 3.076527000 |

### 3-<sup>8</sup>int1(is, is)

|    |              |              |              |
|----|--------------|--------------|--------------|
| Fe | -2.411900000 | 0.908516000  | 0.902603000  |
| N  | -3.583475000 | -0.357819000 | -0.183237000 |
| N  | -2.327952000 | 2.168549000  | -0.681619000 |
| N  | -0.941573000 | 2.011774000  | 1.824102000  |
| N  | -2.185997000 | -0.528044000 | 2.311913000  |
| C  | -4.045226000 | -1.587681000 | 0.207304000  |
| C  | -4.917059000 | -2.139054000 | -0.812959000 |
| H  | -5.414375000 | -3.096047000 | -0.742848000 |
| C  | -4.961613000 | -1.228939000 | -1.830671000 |
| H  | -5.497453000 | -1.290297000 | -2.766785000 |
| C  | -4.120067000 | -0.115148000 | -1.437503000 |
| C  | -3.869840000 | 1.002188000  | -2.209849000 |
| C  | -3.027066000 | 2.056981000  | -1.858084000 |
| C  | -2.741484000 | 3.192100000  | -2.715321000 |
| H  | -3.171137000 | 3.340843000  | -3.695751000 |
| C  | -1.851803000 | 3.982522000  | -2.046732000 |
| H  | -1.396896000 | 4.907952000  | -2.368835000 |
| C  | -1.585824000 | 3.338836000  | -0.774698000 |
| C  | -0.700906000 | 3.814758000  | 0.173617000  |
| C  | -0.390744000 | 3.187338000  | 1.380977000  |
| C  | 0.581150000  | 3.673981000  | 2.339552000  |
| H  | 1.148038000  | 4.587471000  | 2.229023000  |
| C  | 0.627558000  | 2.761967000  | 3.356929000  |
| H  | 1.246960000  | 2.771715000  | 4.241918000  |
| C  | -0.317903000 | 1.713998000  | 3.027087000  |
| C  | -0.538287000 | 0.574844000  | 3.777965000  |
| C  | -1.402023000 | -0.466638000 | 3.437800000  |
| C  | -1.576014000 | -1.670112000 | 4.230242000  |
| H  | -1.069979000 | -1.864447000 | 5.165147000  |
| C  | -2.464190000 | -2.461675000 | 3.562074000  |
| H  | -2.832081000 | -3.440490000 | 3.832946000  |
| C  | -2.842990000 | -1.749337000 | 2.356673000  |
| C  | -3.706416000 | -2.236787000 | 1.395557000  |
| Fe | 0.466856000  | -0.829190000 | -0.761409000 |
| N  | -0.715411000 | -1.378343000 | -2.292804000 |
| N  | 0.018766000  | -2.532676000 | 0.215494000  |
| N  | 1.706819000  | -0.298246000 | 0.747587000  |
| N  | 0.962416000  | 0.865705000  | -1.750074000 |
| C  | -0.940870000 | -0.688253000 | -3.454384000 |
| C  | -1.905026000 | -1.393060000 | -4.276375000 |
| H  | -2.245406000 | -1.056188000 | -5.245061000 |
| C  | -2.270151000 | -2.512615000 | -3.585984000 |
| H  | -2.972129000 | -3.282713000 | -3.870118000 |
| C  | -1.522659000 | -2.504029000 | -2.344849000 |
| C  | -1.596215000 | -3.480484000 | -1.373038000 |
| C  | -0.857506000 | -3.500928000 | -0.189523000 |
| C  | -0.913875000 | -4.569664000 | 0.790579000  |
| H  | -1.528228000 | -5.453486000 | 0.696241000  |
| C  | -0.055127000 | -4.230612000 | 1.793886000  |
| H  | 0.180308000  | -4.775961000 | 2.695826000  |
| C  | 0.526617000  | -2.952461000 | 1.435829000  |
| C  | 1.431458000  | -2.257462000 | 2.205452000  |
| C  | 1.979194000  | -1.013936000 | 1.883262000  |
| C  | 2.902792000  | -0.284832000 | 2.727183000  |
| H  | 3.288235000  | -0.648079000 | 3.668740000  |
| C  | 3.168435000  | 0.896443000  | 2.096822000  |
| H  | 3.818571000  | 1.698646000  | 2.412561000  |
| C  | 2.417451000  | 0.891919000  | 0.859898000  |
| C  | 2.426809000  | 1.905388000  | -0.071196000 |
| C  | 1.754175000  | 1.885519000  | -1.294775000 |
| C  | 1.831061000  | 2.941147000  | -2.283181000 |
| H  | 2.402069000  | 3.850585000  | -2.162697000 |
| C  | 1.065071000  | 2.548060000  | -3.343566000 |
| H  | 0.870385000  | 3.072790000  | -4.267606000 |
| C  | 0.512789000  | 1.252434000  | -3.005570000 |
| C  | -0.360101000 | 0.533957000  | -3.796090000 |
| H  | -2.270178000 | -4.311343000 | -1.550846000 |
| H  | 1.747015000  | -2.710046000 | 3.138671000  |
| H  | -0.636547000 | 0.963127000  | -4.753174000 |
| H  | 3.029535000  | 2.779065000  | 0.148663000  |

|    |              |              |              |
|----|--------------|--------------|--------------|
| H  | -4.143156000 | -3.214340000 | 1.569323000  |
| H  | 0.025273000  | 0.468132000  | 4.698526000  |
| H  | -4.350233000 | 1.056199000  | -3.180789000 |
| H  | -0.184837000 | 4.742155000  | -0.050503000 |
| O  | -0.800402000 | -0.045084000 | -0.031407000 |
| O  | -3.851673000 | 1.773826000  | 1.754679000  |
| O  | 1.938517000  | -1.771779000 | -1.644472000 |
| C  | 3.062304000  | -2.081038000 | -0.998449000 |
| O  | 3.224524000  | -3.103263000 | -0.294906000 |
| C  | 4.160138000  | -1.059332000 | -1.126217000 |
| C  | 4.128108000  | -0.081261000 | -2.130351000 |
| C  | 5.187905000  | -1.051341000 | -0.169258000 |
| C  | 5.117086000  | 0.906179000  | -2.180244000 |
| H  | 3.310311000  | -0.097576000 | -2.839249000 |
| C  | 6.139033000  | -0.043674000 | -0.227666000 |
| H  | 5.199779000  | -1.815135000 | 0.597380000  |
| C  | 6.133672000  | 0.939892000  | -1.215133000 |
| H  | 5.093338000  | 1.661685000  | -2.959122000 |
| H  | 6.898815000  | 1.706864000  | -1.230628000 |
| Cl | 7.462791000  | 0.013930000  | 1.067958000  |
| H  | -3.731008000 | 2.565891000  | 2.320908000  |
| C  | -2.865741000 | 4.468318000  | 3.233951000  |
| H  | -3.691661000 | 4.733406000  | 3.885343000  |
| H  | -2.871842000 | 4.778769000  | 2.195087000  |
| H  | -2.007151000 | 3.935185000  | 3.624865000  |

### 3<sup>-6</sup>int1<sub>(is, is)</sub>

|    |              |              |              |
|----|--------------|--------------|--------------|
| Fe | 2.474891000  | 0.646315000  | 1.019353000  |
| N  | 1.580663000  | -0.204912000 | 2.625842000  |
| N  | 1.308582000  | 2.319028000  | 1.290098000  |
| N  | 3.063197000  | 1.373782000  | -0.775393000 |
| N  | 3.326479000  | -1.147285000 | 0.557562000  |
| C  | 1.800174000  | -1.487890000 | 3.106956000  |
| C  | 1.041793000  | -1.686011000 | 4.327093000  |
| H  | 1.037252000  | -2.601511000 | 4.900539000  |
| C  | 0.360181000  | -0.527769000 | 4.565377000  |
| H  | -0.314189000 | -0.296897000 | 5.377830000  |
| C  | 0.694615000  | 0.388838000  | 3.491410000  |
| C  | 0.158223000  | 1.670731000  | 3.362425000  |
| C  | 0.432278000  | 2.557258000  | 2.338420000  |
| C  | -0.160207000 | 3.870666000  | 2.188686000  |
| H  | -0.879671000 | 4.299741000  | 2.870649000  |
| C  | 0.351942000  | 4.410010000  | 1.041330000  |
| H  | 0.138259000  | 5.371677000  | 0.596759000  |
| C  | 1.258312000  | 3.426318000  | 0.481071000  |
| C  | 1.951004000  | 3.575393000  | -0.721452000 |
| C  | 2.773037000  | 2.626839000  | -1.298371000 |
| C  | 3.442624000  | 2.787026000  | -2.575015000 |
| H  | 3.376118000  | 3.671724000  | -3.191290000 |
| C  | 4.121716000  | 1.628261000  | -2.817100000 |
| H  | 4.732993000  | 1.370585000  | -3.670289000 |
| C  | 3.871038000  | 0.747788000  | -1.691192000 |
| C  | 4.361723000  | -0.554676000 | -1.590562000 |
| C  | 4.101298000  | -1.431303000 | -0.555240000 |
| C  | 4.576301000  | -2.799492000 | -0.481375000 |
| H  | 5.199227000  | -3.272235000 | -1.226751000 |
| C  | 4.076769000  | -3.331719000 | 0.673388000  |
| H  | 4.213033000  | -4.327900000 | 1.069752000  |
| C  | 3.291132000  | -2.292151000 | 1.311266000  |
| C  | 2.588438000  | -2.450139000 | 2.506424000  |
| Fe | -0.501169000 | -0.624942000 | -0.877021000 |
| N  | -0.818108000 | -2.031918000 | 0.545235000  |
| N  | 0.661784000  | -1.917385000 | -1.892480000 |
| N  | -0.227704000 | 0.768839000  | -2.301854000 |
| N  | -1.725658000 | 0.644370000  | 0.118732000  |
| C  | -1.544806000 | -1.876533000 | 1.716814000  |
| C  | -1.481532000 | -3.093558000 | 2.497215000  |
| H  | -1.965102000 | -3.231306000 | 3.453214000  |
| C  | -0.709647000 | -3.975579000 | 1.795260000  |
| H  | -0.432351000 | -4.986730000 | 2.056884000  |
| C  | -0.291130000 | -3.296684000 | 0.586021000  |
| C  | 0.557059000  | -3.849312000 | -0.375311000 |
| C  | 0.997271000  | -3.209612000 | -1.514690000 |
| C  | 1.896470000  | -3.786364000 | -2.493833000 |

|    |              |              |              |
|----|--------------|--------------|--------------|
| H  | 2.306512000  | -4.783875000 | -2.433185000 |
| C  | 2.100092000  | -2.836388000 | -3.452571000 |
| H  | 2.708494000  | -2.895978000 | -4.343555000 |
| C  | 1.328044000  | -1.673026000 | -3.062024000 |
| C  | 1.288557000  | -0.476615000 | -3.781374000 |
| C  | 0.564006000  | 0.642222000  | -3.433171000 |
| C  | 0.514566000  | 1.869225000  | -4.204268000 |
| H  | 1.044356000  | 2.027770000  | -5.132024000 |
| C  | -0.313108000 | 2.722333000  | -3.536820000 |
| H  | -0.610398000 | 3.725402000  | -3.806272000 |
| C  | -0.767738000 | 2.023926000  | -2.350233000 |
| C  | -1.632461000 | 2.570880000  | -1.402795000 |
| C  | -2.078040000 | 1.931172000  | -0.265304000 |
| C  | -2.965029000 | 2.510070000  | 0.719803000  |
| H  | -3.396050000 | 3.497719000  | 0.648333000  |
| C  | -3.128273000 | 1.577601000  | 1.703804000  |
| H  | -3.727285000 | 1.641886000  | 2.600475000  |
| C  | -2.343558000 | 0.423027000  | 1.323427000  |
| C  | -2.244451000 | -0.743862000 | 2.079274000  |
| H  | 0.905871000  | -4.862171000 | -0.204864000 |
| H  | 1.871111000  | -0.429062000 | -4.695018000 |
| H  | -2.783151000 | -0.770331000 | 3.019804000  |
| H  | -1.989032000 | 3.579190000  | -1.580940000 |
| H  | 2.652578000  | -3.416201000 | 2.995514000  |
| H  | 4.983934000  | -0.912548000 | -2.403779000 |
| H  | -0.548058000 | 1.989013000  | 4.121688000  |
| H  | 1.812043000  | 4.505906000  | -1.261423000 |
| O  | 0.815178000  | -0.062499000 | -0.038369000 |
| O  | 3.939479000  | 1.318585000  | 1.973334000  |
| O  | -2.032977000 | -1.299323000 | -1.885548000 |
| C  | -3.135754000 | -0.581097000 | -2.093834000 |
| O  | -3.269487000 | 0.278646000  | -2.993727000 |
| C  | -4.252197000 | -0.847624000 | -1.120159000 |
| C  | -4.213227000 | -1.953367000 | -0.258601000 |
| C  | -5.315046000 | 0.066982000  | -1.042579000 |
| C  | -5.231796000 | -2.148214000 | 0.679477000  |
| H  | -3.370610000 | -2.629055000 | -0.328545000 |
| C  | -6.298924000 | -0.140132000 | -0.087198000 |
| H  | -5.332469000 | 0.912404000  | -1.718437000 |
| C  | -6.288267000 | -1.231687000 | 0.779255000  |
| H  | -5.205007000 | -3.007169000 | 1.342715000  |
| H  | -7.079536000 | -1.362620000 | 1.507716000  |
| Cl | -7.680621000 | 1.086246000  | 0.055251000  |
| H  | 3.922937000  | 2.180856000  | 2.449873000  |
| C  | 3.289293000  | 3.881219000  | 3.583028000  |
| H  | 4.274772000  | 4.301258000  | 3.754115000  |
| H  | 2.882252000  | 3.155726000  | 4.278377000  |
| H  | 2.666159000  | 4.256006000  | 2.779622000  |

### 3<sup>-4</sup>int1<sub>(is, is)</sub>

|    |              |              |              |
|----|--------------|--------------|--------------|
| Fe | -2.285704000 | -0.352316000 | 1.106879000  |
| N  | -3.513998000 | 0.164878000  | -0.407424000 |
| N  | -2.268787000 | 1.571104000  | 1.721615000  |
| N  | -0.973206000 | -0.854863000 | 2.556617000  |
| N  | -2.210463000 | -2.254173000 | 0.432390000  |
| C  | -4.048503000 | -0.677804000 | -1.343470000 |
| C  | -4.902801000 | 0.062118000  | -2.256976000 |
| H  | -5.444684000 | -0.379196000 | -3.081386000 |
| C  | -4.862547000 | 1.367671000  | -1.865014000 |
| H  | -5.362088000 | 2.220117000  | -2.301708000 |
| C  | -3.994883000 | 1.431501000  | -0.703182000 |
| C  | -3.708276000 | 2.578000000  | 0.006778000  |
| C  | -2.913085000 | 2.634985000  | 1.152683000  |
| C  | -2.666213000 | 3.842814000  | 1.921477000  |
| H  | -3.066696000 | 4.816462000  | 1.677456000  |
| C  | -1.862903000 | 3.488769000  | 2.965040000  |
| H  | -1.461562000 | 4.112367000  | 3.750699000  |
| C  | -1.609366000 | 2.064446000  | 2.837244000  |
| C  | -0.805526000 | 1.329429000  | 3.682630000  |
| C  | -0.495737000 | -0.025216000 | 3.538960000  |
| C  | 0.444554000  | -0.737973000 | 4.382810000  |
| H  | 0.952880000  | -0.305564000 | 5.232896000  |
| C  | 0.556428000  | -2.000736000 | 3.875483000  |
| H  | 1.175101000  | -2.815616000 | 4.221764000  |

|    |              |              |              |    |              |              |              |
|----|--------------|--------------|--------------|----|--------------|--------------|--------------|
| C  | -0.327719000 | -2.073862000 | 2.730184000  | N  | -3.511317000 | -0.007402000 | -0.417474000 |
| C  | -0.518467000 | -3.193341000 | 1.947435000  | N  | -2.350824000 | 1.514081000  | 1.689263000  |
| C  | -1.417114000 | -3.279790000 | 0.883833000  | N  | -0.932507000 | -0.814586000 | 2.576894000  |
| C  | -1.654044000 | -4.478777000 | 0.103859000  | N  | -2.078675000 | -2.328136000 | 0.469047000  |
| H  | -1.154020000 | -5.423079000 | 0.265527000  | C  | -4.006630000 | -0.902340000 | -1.328210000 |
| C  | -2.593942000 | -4.161579000 | -0.834071000 | C  | -4.900897000 | -0.228335000 | -2.253372000 |
| H  | -3.017064000 | -4.789911000 | -1.604323000 | H  | -5.424318000 | -0.716830000 | -3.062955000 |
| C  | -2.930982000 | -2.764836000 | -0.639849000 | C  | -4.922802000 | 1.087394000  | -1.895064000 |
| C  | -3.788884000 | -2.045585000 | -1.446801000 | H  | -5.466496000 | 1.902618000  | -2.349647000 |
| Fe | 0.472789000  | 0.403180000  | -0.990633000 | C  | -4.055128000 | 1.224679000  | -0.739968000 |
| N  | 0.966720000  | 1.922338000  | 0.249890000  | C  | -3.832184000 | 2.402053000  | -0.056207000 |
| N  | -0.691136000 | 1.660966000  | -2.047908000 | C  | -3.050134000 | 2.527104000  | 1.090733000  |
| N  | -0.022229000 | -1.119362000 | -2.200934000 | C  | -2.881570000 | 3.760316000  | 1.840054000  |
| N  | 1.654938000  | -0.850058000 | 0.074041000  | H  | -3.334628000 | 4.704543000  | 1.573383000  |
| C  | 1.746482000  | 1.844624000  | 1.373720000  | C  | -2.074512000 | 3.471732000  | 2.900635000  |
| C  | 1.847549000  | 3.145230000  | 2.004013000  | H  | -1.721345000 | 4.131443000  | 3.679855000  |
| H  | 2.412078000  | 3.345749000  | 2.903366000  | C  | -1.737488000 | 2.062818000  | 2.803156000  |
| C  | 1.110829000  | 4.011454000  | 1.247898000  | C  | -0.906812000 | 1.389844000  | 3.674816000  |
| H  | 0.938336000  | 5.066317000  | 1.404354000  | C  | -0.518887000 | 0.055290000  | 3.555415000  |
| C  | 0.551382000  | 3.244243000  | 0.153825000  | C  | 0.449607000  | -0.592254000 | 4.418148000  |
| C  | -0.291364000 | 3.747483000  | -0.814721000 | H  | 0.919572000  | -0.122207000 | 5.270309000  |
| C  | -0.875138000 | 3.001135000  | -1.839621000 | C  | 0.644799000  | -1.850617000 | 3.924182000  |
| C  | -1.799909000 | 3.539426000  | -2.820090000 | H  | 1.305751000  | -2.623763000 | 4.287416000  |
| H  | -2.102662000 | 4.575556000  | -2.871065000 | C  | -0.217874000 | -1.989704000 | 2.769786000  |
| C  | -2.183160000 | 2.498905000  | -3.614368000 | C  | -0.338857000 | -3.133348000 | 2.006827000  |
| H  | -2.866543000 | 2.503007000  | -4.450852000 | C  | -1.229206000 | -3.295283000 | 0.947400000  |
| C  | -1.487140000 | 1.321425000  | -3.131449000 | C  | -1.406152000 | -4.526544000 | 0.201832000  |
| C  | -1.594617000 | 0.061087000  | -3.679374000 | H  | -0.856660000 | -5.438391000 | 0.387635000  |
| C  | -0.898631000 | -1.070178000 | -3.250419000 | C  | -2.367114000 | -4.287045000 | -0.737381000 |
| C  | -1.000368000 | -2.374315000 | -3.879528000 | H  | -2.761281000 | -4.959121000 | -1.485725000 |
| H  | -1.623670000 | -2.592493000 | -4.734798000 | C  | -2.777361000 | -2.905217000 | -0.580638000 |
| C  | -0.168614000 | -3.210089000 | -3.195073000 | C  | -3.679010000 | -2.255365000 | -1.399386000 |
| H  | 0.029697000  | -4.257562000 | -3.368007000 | Fe | 0.465334000  | 0.460612000  | -1.011045000 |
| C  | 0.442728000  | -2.425883000 | -2.141075000 | N  | 0.835008000  | 2.053656000  | 0.176849000  |
| C  | 1.333323000  | -2.916091000 | -1.213684000 | N  | -0.782223000 | 1.597702000  | -2.109291000 |
| C  | 1.900103000  | -2.174771000 | -0.175564000 | N  | 0.056175000  | -1.150259000 | -2.143342000 |
| C  | 2.809922000  | -2.713772000 | 0.814892000  | N  | 1.685165000  | -0.688828000 | 0.127381000  |
| H  | 3.172849000  | -3.731387000 | 0.822077000  | C  | 1.611657000  | 2.067268000  | 1.306536000  |
| C  | 3.091915000  | -1.701854000 | 1.685774000  | C  | 1.626045000  | 3.393275000  | 1.889074000  |
| H  | 3.734594000  | -1.717324000 | 2.553520000  | H  | 2.168959000  | 3.662378000  | 2.783916000  |
| C  | 2.365680000  | -0.535514000 | 1.227117000  | C  | 0.838985000  | 4.182635000  | 1.098920000  |
| C  | 2.393940000  | 0.698003000  | 1.836907000  | H  | 0.597667000  | 5.228928000  | 1.217305000  |
| H  | -0.537111000 | 4.802820000  | -0.765611000 | C  | 0.337600000  | 3.341488000  | 0.032575000  |
| H  | -2.262564000 | -0.060804000 | -4.524892000 | C  | -0.531543000 | 3.751402000  | -0.958002000 |
| H  | 2.989699000  | 0.795697000  | 2.737201000  | C  | -1.058052000 | 2.930369000  | -1.956722000 |
| H  | 1.617233000  | -3.959349000 | -1.292818000 | C  | -2.007545000 | 3.367222000  | -2.962444000 |
| H  | -4.277284000 | -2.581311000 | -2.253910000 | H  | -2.379625000 | 4.377506000  | -3.056023000 |
| H  | 0.056703000  | -4.080017000 | 2.189353000  | C  | -2.312757000 | 2.272725000  | -3.718155000 |
| H  | -4.148818000 | 3.506088000  | -0.340519000 | H  | -2.988555000 | 2.198312000  | -4.557496000 |
| H  | -0.343706000 | 1.854876000  | 4.511820000  | C  | -1.543713000 | 1.165405000  | -3.184174000 |
| O  | -0.867056000 | 0.033983000  | 0.028463000  | C  | -1.563007000 | -0.121088000 | -3.682922000 |
| O  | -3.723519000 | -0.675485000 | 2.164617000  | C  | -0.806248000 | -1.192532000 | -3.204934000 |
| O  | 1.925384000  | 0.860192000  | -2.137863000 | C  | -0.824383000 | -2.522870000 | -3.784581000 |
| C  | 3.033540000  | 0.112607000  | -2.222604000 | H  | -1.421599000 | -2.809526000 | -4.638250000 |
| O  | 3.143795000  | -0.910546000 | -2.929991000 | C  | 0.042848000  | -3.283089000 | -3.056996000 |
| C  | 4.170156000  | 0.583533000  | -1.360416000 | H  | 0.302227000  | -4.323440000 | -3.186259000 |
| C  | 4.153197000  | 1.852237000  | -0.762572000 | C  | 0.591998000  | -2.424761000 | -2.027613000 |
| C  | 5.233515000  | -0.298986000 | -1.109166000 | C  | 1.498879000  | -2.822752000 | -1.071313000 |
| C  | 5.193622000  | 2.239973000  | 0.087534000  | C  | 2.012957000  | -2.005918000 | -0.061655000 |
| H  | 3.311688000  | 2.503933000  | -0.957934000 | C  | 2.948203000  | -2.444513000 | 0.953012000  |
| C  | 6.240099000  | 0.105577000  | -0.245156000 | H  | 3.374251000  | -3.435935000 | 1.006438000  |
| H  | 5.234228000  | -1.272693000 | -1.581974000 | C  | 3.162684000  | -1.379349000 | 1.779496000  |
| C  | 6.250187000  | 1.360256000  | 0.361846000  | H  | 3.801168000  | -1.317273000 | 2.648232000  |
| H  | 5.181044000  | 3.221985000  | 0.549486000  | C  | 2.368373000  | -0.282580000 | 1.267378000  |
| H  | 7.057553000  | 1.641732000  | 1.027277000  | C  | 2.319849000  | 0.978403000  | 1.819674000  |
| Cl | 7.622707000  | -1.068084000 | 0.130273000  | H  | -0.845024000 | 4.789905000  | -0.950484000 |
| H  | -3.596761000 | -1.497644000 | 2.702587000  | H  | -2.212170000 | -0.316274000 | -4.529594000 |
| C  | -3.367413000 | -3.173780000 | 3.885587000  | H  | 2.904555000  | 1.149609000  | 2.716510000  |
| H  | -4.355507000 | -3.093426000 | 4.325559000  | H  | 1.843628000  | -3.850242000 | -1.103494000 |
| H  | -2.510642000 | -2.742017000 | 4.390411000  | H  | -4.144329000 | -2.837165000 | -2.187833000 |
| H  | -3.215076000 | -3.777105000 | 2.997858000  | H  | 0.285273000  | -3.980059000 | 2.269411000  |
|    |              |              |              | H  | -4.322866000 | 3.295898000  | -0.425287000 |
|    |              |              |              | H  | -0.489764000 | 1.953640000  | 4.502397000  |
|    |              |              |              | O  | -0.912938000 | 0.016101000  | 0.060157000  |
|    |              |              |              | O  | -3.654152000 | -0.807111000 | 2.142203000  |
| Fe | -2.223926000 | -0.406693000 | 1.079554000  |    |              |              |              |

3-<sup>2</sup>int1<sub>(is, is)</sub>

|    |              |              |              |
|----|--------------|--------------|--------------|
| O  | 1.906714000  | 0.925926000  | -2.157071000 |
| C  | 3.012813000  | 0.177712000  | -2.252732000 |
| O  | 3.123229000  | -0.836409000 | -2.972922000 |
| C  | 4.149754000  | 0.637345000  | -1.384116000 |
| C  | 4.140965000  | 1.905147000  | -0.783789000 |
| C  | 5.203157000  | -0.255228000 | -1.127916000 |
| C  | 5.180535000  | 2.281862000  | 0.072229000  |
| H  | 3.306881000  | 2.565488000  | -0.983405000 |
| C  | 6.207565000  | 0.137446000  | -0.255780000 |
| H  | 5.198020000  | -1.227925000 | -1.602705000 |
| C  | 6.226511000  | 1.391091000  | 0.352629000  |
| H  | 5.176457000  | 3.264180000  | 0.533927000  |
| H  | 7.032261000  | 1.663797000  | 1.023681000  |
| Cl | 7.573477000  | -1.052593000 | 0.129077000  |
| H  | -3.465286000 | -1.548190000 | 2.769454000  |
| C  | -3.082560000 | -3.111078000 | 4.089955000  |
| H  | -4.074916000 | -3.125128000 | 4.527871000  |
| H  | -2.284946000 | -2.551005000 | 4.565736000  |
| H  | -2.857177000 | -3.736543000 | 3.233542000  |

### 3-<sup>12</sup>ts<sub>2</sub>(hs, hs)

|    |              |              |              |
|----|--------------|--------------|--------------|
| Fe | 2.244299000  | -0.195303000 | 1.182504000  |
| N  | 3.589299000  | -0.003104000 | -0.385096000 |
| N  | 2.104798000  | -2.251503000 | 0.808904000  |
| N  | 0.952099000  | -0.418102000 | 2.798904000  |
| N  | 2.363100000  | 1.840797000  | 1.561104000  |
| C  | 4.162500000  | 1.161796000  | -0.807696000 |
| C  | 5.021300000  | 0.881595000  | -1.950796000 |
| H  | 5.602600000  | 1.621895000  | -2.482396000 |
| C  | 4.934499000  | -0.461405000 | -2.198596000 |
| H  | 5.426599000  | -1.030205000 | -2.974396000 |
| C  | 4.023799000  | -1.021804000 | -1.209996000 |
| C  | 3.639398000  | -2.355304000 | -1.113296000 |
| C  | 2.759397000  | -2.928703000 | -0.179396000 |
| C  | 2.402496000  | -4.339903000 | -0.106596000 |
| H  | 2.779996000  | -5.106803000 | -0.768496000 |
| C  | 1.525396000  | -4.479402000 | 0.933904000  |
| H  | 1.041396000  | -5.380202000 | 1.283204000  |
| C  | 1.336697000  | -3.156602000 | 1.513904000  |
| C  | 0.520597000  | -2.840802000 | 2.594804000  |
| C  | 0.325998000  | -1.577202000 | 3.179804000  |
| C  | -0.607902000 | -1.280601000 | 4.253904000  |
| H  | -1.230202000 | -2.013101000 | 4.748604000  |
| C  | -0.551301000 | 0.068699000  | 4.478804000  |
| H  | -1.120000000 | 0.650999000  | 5.189304000  |
| C  | 0.423700000  | 0.618798000  | 3.552204000  |
| C  | 0.752700000  | 1.964198000  | 3.415704000  |
| C  | 1.651101000  | 2.534797000  | 2.498504000  |
| C  | 1.960902000  | 3.953197000  | 2.377304000  |
| H  | 1.540102000  | 4.732098000  | 2.997504000  |
| C  | 2.856002000  | 4.082197000  | 1.351004000  |
| H  | 3.303102000  | 4.987196000  | 0.965404000  |
| C  | 3.106701000  | 2.746297000  | 0.828004000  |
| C  | 3.932601000  | 2.430496000  | -0.245696000 |
| Fe | -0.571301000 | 0.339799000  | -1.097096000 |
| N  | 0.675999000  | -0.248102000 | -2.638596000 |
| N  | 0.089701000  | 2.303998000  | -1.293496000 |
| N  | -1.688400000 | 0.888600000  | 0.582704000  |
| N  | -1.079002000 | -1.659401000 | -0.744096000 |
| C  | 0.868598000  | -1.528702000 | -3.084796000 |
| C  | 1.850598000  | -1.515503000 | -4.154896000 |
| H  | 2.187498000  | -2.389303000 | -4.694596000 |
| C  | 2.253299000  | -0.215603000 | -4.317696000 |
| H  | 2.984499000  | 0.173197000  | -5.011396000 |
| C  | 1.519500000  | 0.585798000  | -3.354596000 |
| C  | 1.654200000  | 1.957897000  | -3.158996000 |
| C  | 0.990401000  | 2.759998000  | -2.213296000 |
| C  | 1.157302000  | 4.196698000  | -2.044096000 |
| H  | 1.807202000  | 4.818297000  | -2.643596000 |
| C  | 0.345702000  | 4.575898000  | -1.009496000 |
| H  | 0.208103000  | 5.565298000  | -0.598096000 |
| C  | -0.326199000 | 3.377899000  | -0.529796000 |
| C  | -1.219299000 | 3.307699000  | 0.532704000  |
| C  | -1.852699000 | 2.162900000  | 1.051304000  |

|    |              |              |              |
|----|--------------|--------------|--------------|
| C  | -2.762899000 | 2.139200000  | 2.184304000  |
| H  | -3.081699000 | 3.011000000  | 2.737804000  |
| C  | -3.122000000 | 0.833101000  | 2.387104000  |
| H  | -3.787301000 | 0.433701000  | 3.138604000  |
| C  | -2.440301000 | 0.039800000  | 1.379404000  |
| C  | -2.524902000 | -1.338200000 | 1.224304000  |
| C  | -1.896402000 | -2.129900000 | 0.246204000  |
| C  | -2.019103000 | -3.572500000 | 0.117904000  |
| H  | -2.613504000 | -4.200800000 | 0.766204000  |
| C  | -1.247903000 | -3.949701000 | -0.949496000 |
| H  | -1.083204000 | -4.945901000 | -1.333996000 |
| C  | -0.644503000 | -2.742801000 | -1.490096000 |
| C  | 0.242097000  | -2.674702000 | -2.560096000 |
| H  | 2.359401000  | 2.467797000  | -3.808196000 |
| H  | -1.456298000 | 4.245699000  | 1.024604000  |
| H  | 0.499497000  | 3.617702000  | -3.032596000 |
| H  | -3.159602000 | -1.864199000 | 1.930104000  |
| H  | 4.450901000  | 3.261796000  | -0.713796000 |
| H  | 0.246901000  | 2.653298000  | 4.084904000  |
| H  | 4.071097000  | -3.033904000 | -1.842696000 |
| H  | -0.043703000 | -3.659801000 | 3.030004000  |
| O  | 0.926699000  | 0.077698000  | 0.118504000  |
| O  | 3.714999000  | -0.543704000 | 2.299304000  |
| O  | -2.136000000 | 0.663100000  | -2.227996000 |
| C  | -3.299000000 | 1.202901000  | -1.849896000 |
| O  | -3.507599000 | 2.431301000  | -1.762096000 |
| C  | -4.352401000 | 0.204801000  | -1.460496000 |
| C  | -4.208602000 | -1.159799000 | -1.750996000 |
| C  | -5.470700000 | 0.657402000  | -0.740596000 |
| C  | -5.175602000 | -2.073798000 | -1.320196000 |
| H  | -3.329302000 | -1.485599000 | -2.291496000 |
| C  | -6.403201000 | -0.274697000 | -0.310696000 |
| H  | -5.568800000 | 1.714402000  | -0.528396000 |
| C  | -6.285902000 | -1.636697000 | -0.584596000 |
| H  | -5.062403000 | -3.129698000 | -1.542896000 |
| H  | -7.038302000 | -2.333597000 | -0.235096000 |
| Cl | -7.858101000 | 0.304104000  | 0.677804000  |
| H  | 3.447099000  | -0.668504000 | 3.235104000  |
| C  | 5.208097000  | -2.644605000 | 2.327004000  |
| H  | 4.301597000  | -3.232504000 | 2.399704000  |
| H  | 5.794798000  | -2.426105000 | 3.212304000  |
| H  | 5.485198000  | -2.215605000 | 1.374104000  |

### 3-<sup>10</sup>ts<sub>2</sub>(hs, hs)

|    |              |              |              |
|----|--------------|--------------|--------------|
| Fe | 2.441423338  | -0.371449041 | 1.266962991  |
| N  | 2.355852064  | -2.225971863 | 0.289859954  |
| N  | 0.973828926  | -1.022274495 | 2.592872517  |
| N  | 2.138610658  | 1.586685481  | 1.933464694  |
| N  | 3.564244880  | 0.372161373  | -0.342379253 |
| C  | 3.035130127  | -2.583047510 | -0.844383752 |
| C  | 2.776570112  | -3.986124700 | -1.133599222 |
| H  | 3.191361963  | -4.530767758 | -1.970305744 |
| C  | 1.919595482  | -4.443876240 | -0.169125765 |
| H  | 1.495616199  | -5.432512048 | -0.068146491 |
| C  | 1.644649520  | -3.329892931 | 0.724131836  |
| C  | 0.794635502  | -3.359034600 | 1.824633344  |
| C  | 0.473986850  | -2.295521973 | 2.684586432  |
| C  | -0.475536113 | -2.356393222 | 3.784589492  |
| H  | -1.016368421 | -3.243071513 | 4.084351227  |
| C  | -0.549058375 | -1.099843979 | 4.323069318  |
| H  | -1.165090264 | -0.760765422 | 5.143345855  |
| C  | 0.356912975  | -0.253474632 | 3.563655933  |
| C  | 0.545385948  | 1.112780288  | 3.748918929  |
| C  | 1.359175883  | 1.969502866  | 2.990497916  |
| C  | 1.478967066  | 3.409547944  | 3.175771575  |
| H  | 0.972601976  | 3.976744049  | 3.944175227  |
| C  | 2.321444737  | 3.871706043  | 2.202722678  |
| H  | 2.630877455  | 4.889832249  | 2.015823163  |
| C  | 2.732197578  | 2.722228329  | 1.409316237  |
| C  | 3.554893837  | 2.757465570  | 0.289248034  |
| C  | 3.927246931  | 1.680053198  | -0.532870732 |
| C  | 4.719936765  | 1.781743385  | -1.748658139 |
| H  | 5.141867815  | 2.699284960  | -2.134314845 |
| C  | 4.796586058  | 0.525435170  | -2.287243498 |

|    |              |              |              |    |              |              |              |
|----|--------------|--------------|--------------|----|--------------|--------------|--------------|
| H  | 5.285730418  | 0.220178743  | -3.201025639 | H  | 5.491343000  | 2.045145000  | -2.362458000 |
| C  | 4.052307899  | -0.363756398 | -1.409988510 | C  | 4.902185000  | -0.079259000 | -2.284878000 |
| C  | 3.823957242  | -1.719546924 | -1.623137227 | H  | 5.397821000  | -0.546860000 | -3.123490000 |
| Fe | -0.458259322 | 0.423748386  | -0.934560614 | C  | 4.032630000  | -0.771519000 | -1.344275000 |
| N  | 0.704685959  | 0.309030802  | -2.639461276 | C  | 3.697454000  | -2.121348000 | -1.380426000 |
| N  | -0.084507309 | 2.452558730  | -0.778240321 | C  | 2.856016000  | -2.821958000 | -0.498039000 |
| N  | -1.723447812 | 0.539311406  | 0.720780721  | C  | 2.539702000  | -4.242501000 | -0.573335000 |
| N  | -0.917462558 | -1.606018686 | -1.110040076 | H  | 2.927890000  | -4.923165000 | -1.317960000 |
| C  | 0.958836440  | -0.812628116 | -3.376076594 | C  | 1.679115000  | -4.517515000 | 0.454507000  |
| C  | 1.857992186  | -0.470130722 | -4.467997790 | H  | 1.225190000  | -5.464245000 | 0.709842000  |
| H  | 2.219271860  | -1.166825415 | -5.211368452 | C  | 1.462127000  | -3.270362000 | 1.174579000  |
| C  | 2.133144421  | 0.866180229  | -4.357777270 | C  | 0.647422000  | -3.092800000 | 2.288235000  |
| H  | 2.766738221  | 1.471560452  | -4.989854803 | C  | 0.423364000  | -1.905308000 | 3.008435000  |
| C  | 1.404724958  | 1.359875101  | -3.199940201 | C  | -0.515829000 | -1.751439000 | 4.106994000  |
| C  | 1.402742782  | 2.668051384  | -2.727320591 | H  | -1.116547000 | -2.549199000 | 4.520648000  |
| C  | 0.706305368  | 3.180146718  | -1.618483414 | C  | -0.496494000 | -0.432008000 | 4.473773000  |
| C  | 0.713680210  | 4.570355121  | -1.181624110 | H  | -1.079911000 | 0.055173000  | 5.241671000  |
| H  | 1.252998352  | 5.367756840  | -1.673130056 | C  | 0.460085000  | 0.239518000  | 3.610577000  |
| C  | -0.083560582 | 4.646741693  | -0.074044441 | C  | 0.744938000  | 1.602909000  | 3.610491000  |
| H  | -0.322113703 | 5.517615233  | 0.518918858  | C  | 1.612388000  | 2.296421000  | 2.749915000  |
| C  | -0.591681073 | 3.307689532  | 0.181055838  | C  | 1.861789000  | 3.731266000  | 2.765106000  |
| C  | -1.452214319 | 2.939203331  | 1.204031491  | H  | 1.420188000  | 4.427557000  | 3.464007000  |
| C  | -1.984560080 | 1.661065302  | 1.455490916  | C  | 2.731453000  | 3.997749000  | 1.743085000  |
| C  | -2.893088052 | 1.323134155  | 2.538695752  | H  | 3.133340000  | 4.954279000  | 1.441443000  |
| H  | -3.277320600 | 2.027448013  | 3.262663570  | C  | 3.026095000  | 2.730899000  | 1.088799000  |
| C  | -3.151304155 | -0.017377924 | 2.444194565  | C  | 3.838522000  | 2.556673000  | -0.027901000 |
| H  | -3.786129811 | -0.621284280 | 3.075907277  | Fe | -0.554097000 | 0.395702000  | -1.043679000 |
| C  | -2.408373890 | -0.517055144 | 1.300336655  | N  | 0.645349000  | 0.049950000  | -2.629397000 |
| C  | -2.388722496 | -1.828702902 | 0.849630915  | N  | -0.026729000 | 2.349929000  | -1.056702000 |
| C  | -1.704515676 | -2.338484726 | -0.268568378 | N  | -1.719251000 | 0.723241000  | 0.595137000  |
| C  | -1.741936397 | -3.717644162 | -0.726142683 | N  | -1.016661000 | -1.580461000 | -0.959367000 |
| H  | -2.297859640 | -4.511459625 | -0.247380586 | C  | 0.859863000  | -1.152346000 | -3.256746000 |
| C  | -0.953444431 | -3.791120905 | -1.843302548 | C  | 1.803873000  | -0.981466000 | -4.341728000 |
| H  | -0.734435589 | -4.657970131 | -2.450092938 | H  | 2.134883000  | -1.775313000 | -4.996058000 |
| C  | -0.426621921 | -2.457514480 | -2.084030438 | C  | 2.169792000  | 0.335420000  | -4.348710000 |
| C  | 0.434101297  | -2.090048046 | -3.112983753 | H  | 2.864206000  | 0.837708000  | -5.006135000 |
| H  | 2.001420446  | 3.381277814  | -3.285491155 | C  | 1.446063000  | 0.982247000  | -3.274757000 |
| H  | -1.766501324 | 3.728400494  | 1.879221147  | C  | 1.544050000  | 2.320951000  | -2.946992000 |
| H  | 0.735657528  | -2.880559046 | -3.793437013 | C  | 0.845763000  | 2.957718000  | -1.919566000 |
| H  | -2.983005993 | -2.540232086 | 1.413580067  | C  | 0.939182000  | 4.373189000  | -1.614606000 |
| H  | 4.276984562  | -2.151614109 | -2.510106364 | H  | 1.556361000  | 5.076408000  | -2.155233000 |
| H  | 3.926721406  | 3.734088504  | -0.004690827 | C  | 0.108153000  | 4.606828000  | -0.557263000 |
| H  | 0.303338823  | -4.305217311 | 2.028669174  | H  | -0.092312000 | 5.539247000  | -0.050322000 |
| H  | -0.022267040 | 1.573698117  | 4.551130181  | C  | -0.496193000 | 3.337206000  | -0.204746000 |
| O  | 0.854846184  | 0.063654234  | 0.027825337  | C  | -1.386617000 | 3.148543000  | 0.831608000  |
| C  | 3.920450015  | -0.756980149 | 2.341675220  | C  | -1.952171000 | 1.928150000  | 1.206408000  |
| O  | -1.970303437 | 0.844389816  | -2.085032356 | C  | -2.853493000 | 1.749076000  | 2.325923000  |
| C  | -3.117491068 | 1.367978001  | -1.641347359 | H  | -3.208915000 | 2.548857000  | 2.959421000  |
| O  | -3.298895685 | 2.581953362  | -1.407270417 | C  | -3.147666000 | 0.416365000  | 2.392472000  |
| C  | -4.210270403 | 0.364056573  | -1.402119961 | H  | -3.790535000 | -0.097216000 | 3.091915000  |
| C  | -4.109632654 | -0.948755222 | -1.885004208 | C  | -2.433699000 | -0.228407000 | 1.310818000  |
| C  | -5.318147002 | 0.746435064  | -0.627874225 | C  | -2.467872000 | -1.578940000 | 1.031031000  |
| C  | -5.110211083 | -1.881297363 | -1.593709923 | C  | -1.811724000 | -2.204067000 | -0.030609000 |
| H  | -3.235513242 | -1.220700432 | -2.462244928 | C  | -1.900024000 | -3.618845000 | -0.325646000 |
| C  | -6.284131071 | -0.205735435 | -0.338374563 | H  | -2.474037000 | -4.328864000 | 0.252340000  |
| H  | -5.382972696 | 1.764506929  | -0.265809342 | C  | -1.139001000 | -3.843346000 | -1.438519000 |
| C  | -6.210567707 | -1.517118142 | -0.805075635 | H  | -0.952949000 | -4.776270000 | -1.950458000 |
| H  | -5.032596502 | -2.897051019 | -1.968025445 | C  | -0.577365000 | -2.567479000 | -1.831129000 |
| H  | -6.988197961 | -2.230999994 | -0.561026830 | C  | 0.283756000  | -2.371447000 | -2.893707000 |
| Cl | -7.725541157 | 0.274511921  | 0.720928271  | H  | 2.210849000  | 2.932103000  | -3.545435000 |
| H  | 4.845823979  | -0.840013975 | 2.044344706  | H  | -1.673633000 | 4.021970000  | 1.406420000  |
| C  | 4.339041247  | -3.307988421 | 2.729655760  | H  | 0.548827000  | -3.239890000 | -3.487118000 |
| H  | 4.327248569  | -3.553831947 | 1.674708550  | H  | -3.075710000 | -2.205449000 | 1.673897000  |
| H  | 5.278234712  | -3.192051301 | 3.259246551  | H  | 4.315696000  | 3.450412000  | -0.418535000 |
| H  | 3.403917922  | -3.180028896 | 3.255970314  | H  | 0.222492000  | 2.202357000  | 4.349709000  |

### 3-<sup>4</sup>ts<sub>2</sub>(hs, hs)

|    |             |              |              |   |              |              |              |
|----|-------------|--------------|--------------|---|--------------|--------------|--------------|
| Fe | 2.268827000 | -0.263366000 | 1.143108000  | O | 0.927851000  | 0.063800000  | 0.161502000  |
| N  | 3.578598000 | 0.139867000  | -0.411350000 | O | 3.770578000  | -0.678641000 | 2.205769000  |
| N  | 2.197075000 | -2.273641000 | 0.564092000  | O | -2.137396000 | 0.804047000  | -2.232949000 |
| N  | 1.015552000 | -0.695507000 | 2.752745000  | C | -3.276563000 | 1.315713000  | -1.785551000 |
| N  | 2.336113000 | 1.726971000  | 1.739432000  | O | -3.492035000 | 2.536519000  | -1.594455000 |
| C  | 4.102555000 | 1.362065000  | -0.721081000 | C | -4.327422000 | 0.294892000  | -1.427835000 |
| C  | 4.947254000 | 1.233151000  | -1.900849000 | C | -4.206242000 | -1.044264000 | -1.825940000 |
|    |             |              |              | C | -5.409258000 | 0.692831000  | -0.625314000 |



|    |              |              |              |
|----|--------------|--------------|--------------|
| C  | -5.157421000 | -1.986856000 | -1.422248000 |
| H  | -3.352577000 | -1.327184000 | -2.428688000 |
| C  | -6.324540000 | -0.268115000 | -0.222425000 |
| H  | -5.491617000 | 1.731780000  | -0.332563000 |
| C  | -6.229495000 | -1.605617000 | -0.602888000 |
| H  | -5.062204000 | -3.023020000 | -1.731294000 |
| H  | -6.968744000 | -2.325314000 | -0.271972000 |
| Cl | -7.727774000 | 0.236894000  | 0.880229000  |
| H  | 3.494673000  | -0.894800000 | 3.122704000  |
| C  | 5.066010000  | -2.953017000 | 2.576883000  |
| H  | 4.187124000  | -3.379745000 | 2.111005000  |
| H  | 5.199988000  | -3.009964000 | 3.652453000  |
| H  | 5.795446000  | -2.437352000 | 1.966985000  |

### 3-<sup>2</sup>ts<sub>2</sub>(<sub>hs, hs</sub>)

|    |              |              |              |
|----|--------------|--------------|--------------|
| Fe | 2.463500000  | -0.441071000 | 1.224850000  |
| N  | 2.407292000  | -2.277171000 | 0.198162000  |
| N  | 0.973016000  | -1.149039000 | 2.520154000  |
| N  | 2.150443000  | 1.479297000  | 1.964399000  |
| N  | 3.566939000  | 0.360356000  | -0.363213000 |
| C  | 3.050010000  | -2.577068000 | -0.973615000 |
| C  | 2.747589000  | -3.950639000 | -1.346647000 |
| H  | 3.128570000  | -4.449314000 | -2.226888000 |
| C  | 1.893275000  | -4.446593000 | -0.398555000 |
| H  | 1.436451000  | -5.424955000 | -0.358726000 |
| C  | 1.661448000  | -3.384740000 | 0.568035000  |
| C  | 0.790273000  | -3.447961000 | 1.651329000  |
| C  | 0.463486000  | -2.418936000 | 2.550929000  |
| C  | -0.492157000 | -2.523909000 | 3.643453000  |
| H  | -1.040879000 | -3.419234000 | 3.899814000  |
| C  | -0.556030000 | -1.294048000 | 4.241115000  |
| H  | -1.172141000 | -0.988485000 | 5.074418000  |
| C  | 0.360486000  | -0.421022000 | 3.523064000  |
| C  | 0.563461000  | 0.933808000  | 3.768527000  |
| C  | 1.385402000  | 1.816984000  | 3.047906000  |
| C  | 1.530569000  | 3.241713000  | 3.308912000  |
| H  | 1.038481000  | 3.775602000  | 4.109729000  |
| C  | 2.375965000  | 3.741424000  | 2.356249000  |
| H  | 2.702388000  | 4.762710000  | 2.223163000  |
| C  | 2.763348000  | 2.630411000  | 1.500572000  |
| C  | 3.585142000  | 2.710616000  | 0.381442000  |
| C  | 3.944692000  | 1.670299000  | -0.492200000 |
| C  | 4.742567000  | 1.819923000  | -1.701297000 |
| H  | 5.174267000  | 2.750053000  | -2.043498000 |
| C  | 4.809642000  | 0.589380000  | -2.295402000 |
| H  | 5.300848000  | 0.320245000  | -3.219371000 |
| C  | 4.056821000  | -0.333030000 | -1.458689000 |
| C  | 3.828458000  | -1.678342000 | -1.725213000 |
| Fe | -0.453322000 | 0.417302000  | -0.960999000 |
| N  | 0.708061000  | 0.338305000  | -2.669094000 |
| N  | -0.005736000 | 2.421294000  | -0.713243000 |
| N  | -1.712987000 | 0.504003000  | 0.699016000  |
| N  | -0.984187000 | -1.584976000 | -1.227712000 |
| C  | 0.924927000  | -0.758151000 | -3.453046000 |
| C  | 1.832551000  | -0.397618000 | -4.533036000 |
| H  | 2.169874000  | -1.073241000 | -5.306536000 |
| C  | 2.147427000  | 0.923938000  | -4.368815000 |
| H  | 2.796256000  | 1.536673000  | -4.977961000 |
| C  | 1.436605000  | 1.390952000  | -3.188463000 |
| C  | 1.472436000  | 2.678144000  | -2.665257000 |
| C  | 0.792760000  | 3.162343000  | -1.533597000 |
| C  | 0.828419000  | 4.536658000  | -1.049887000 |
| H  | 1.380874000  | 5.339618000  | -1.517144000 |
| C  | 0.038474000  | 4.590242000  | 0.063853000  |
| H  | -0.182392000 | 5.444853000  | 0.686539000  |
| C  | -0.495723000 | 3.253366000  | 0.275218000  |
| C  | -1.367767000 | 2.871940000  | 1.283024000  |
| C  | -1.937724000 | 1.601153000  | 1.481511000  |
| C  | -2.852049000 | 1.243849000  | 2.554307000  |
| H  | -3.213003000 | 1.928099000  | 3.308862000  |
| C  | -3.146579000 | -0.083915000 | 2.407030000  |
| H  | -3.796383000 | -0.695355000 | 3.015926000  |
| C  | -2.422829000 | -0.557216000 | 1.238996000  |
| C  | -2.441119000 | -1.849695000 | 0.738053000  |

|    |              |              |              |
|----|--------------|--------------|--------------|
| C  | -1.777640000 | -2.331198000 | -0.405227000 |
| C  | -1.842342000 | -3.693815000 | -0.909332000 |
| H  | -2.409794000 | -4.493390000 | -0.454105000 |
| C  | -1.061612000 | -3.743320000 | -2.033219000 |
| H  | -0.862830000 | -4.592539000 | -2.671353000 |
| C  | -0.511400000 | -2.411566000 | -2.231878000 |
| C  | 0.360946000  | -2.029388000 | -3.244540000 |
| H  | 2.087205000  | 3.397315000  | -3.197335000 |
| H  | -1.659771000 | 3.642758000  | 1.988503000  |
| H  | 0.643009000  | -2.800661000 | -3.954683000 |
| H  | -3.047180000 | -2.568316000 | 1.279945000  |
| H  | 4.265941000  | -2.070434000 | -2.638107000 |
| H  | 3.970413000  | 3.695583000  | 0.137038000  |
| H  | 0.278714000  | -4.393639000 | 1.801114000  |
| H  | 0.003685000  | 1.364180000  | 4.593028000  |
| O  | 0.824302000  | -0.054371000 | -0.016477000 |
| O  | 3.924085000  | -0.844912000 | 2.323199000  |
| O  | -1.928968000 | 0.953970000  | -2.091797000 |
| C  | -3.056634000 | 1.496108000  | -1.609002000 |
| O  | -3.196658000 | 2.708113000  | -1.344762000 |
| C  | -4.172414000 | 0.518503000  | -1.379288000 |
| C  | -4.127535000 | -0.774440000 | -1.920184000 |
| C  | -5.245345000 | 0.902069000  | -0.557797000 |
| C  | -5.149710000 | -1.686608000 | -1.640070000 |
| H  | -3.277541000 | -1.049013000 | -2.530921000 |
| C  | -6.232457000 | -0.031471000 | -0.279667000 |
| H  | -5.267590000 | 1.904736000  | -0.150669000 |
| C  | -6.214609000 | -1.322841000 | -0.804214000 |
| H  | -5.115314000 | -2.687171000 | -2.058936000 |
| H  | -7.007424000 | -2.022272000 | -0.567383000 |
| Cl | -7.624801000 | 0.445762000  | 0.843905000  |
| H  | 4.694448000  | -1.393507000 | 2.083009000  |
| C  | 3.548687000  | -2.946322000 | 3.816023000  |
| H  | 3.353773000  | -3.521684000 | 2.919398000  |
| H  | 4.517797000  | -2.993521000 | 4.300513000  |
| H  | 2.771112000  | -2.312276000 | 4.217028000  |

### 3-<sup>8</sup>ts<sub>2</sub>(<sub>is, is</sub>)

|    |              |              |              |
|----|--------------|--------------|--------------|
| Fe | 2.362100000  | -0.178690000 | 1.298698000  |
| N  | 3.551199000  | 0.304913000  | -0.366302000 |
| N  | 2.327307000  | -2.107491000 | 0.687898000  |
| N  | 0.875402000  | -0.649595000 | 2.755998000  |
| N  | 2.134894000  | 1.754709000  | 1.721298000  |
| C  | 3.984395000  | 1.551015000  | -0.705802000 |
| C  | 4.832295000  | 1.473118000  | -1.887702000 |
| H  | 5.312492000  | 2.316419000  | -2.364302000 |
| C  | 4.881599000  | 0.155018000  | -2.251702000 |
| H  | 5.403901000  | -0.289080000 | -3.087002000 |
| C  | 4.067902000  | -0.578085000 | -1.292402000 |
| C  | 3.821606000  | -1.941386000 | -1.284702000 |
| C  | 3.019509000  | -2.642388000 | -0.370402000 |
| C  | 2.782313000  | -4.072489000 | -0.434002000 |
| H  | 3.213815000  | -4.732188000 | -1.173502000 |
| C  | 1.928914000  | -4.384892000 | 0.587098000  |
| H  | 1.515018000  | -5.349093000 | 0.844598000  |
| C  | 1.631010000  | -3.150093000 | 1.289298000  |
| C  | 0.746510000  | -3.054096000 | 2.355398000  |
| C  | 0.371806000  | -1.886397000 | 3.034198000  |
| C  | -0.617994000 | -1.787600000 | 4.098698000  |
| H  | -1.166992000 | -2.620502000 | 4.515598000  |
| C  | -0.709799000 | -0.463401000 | 4.431998000  |
| H  | -1.351600000 | -0.002903000 | 5.169398000  |
| C  | 0.227399000  | 0.251402000  | 3.577598000  |
| C  | 0.455394000  | 1.618003000  | 3.550098000  |
| C  | 1.336092000  | 2.303406000  | 2.697898000  |
| C  | 1.498887000  | 3.744507000  | 2.699598000  |
| H  | 0.982785000  | 4.416305000  | 3.370698000  |
| C  | 2.385386000  | 4.053310000  | 1.705998000  |
| H  | 2.736183000  | 5.027911000  | 1.399098000  |
| C  | 2.780790000  | 2.807011000  | 1.079798000  |
| C  | 3.626191000  | 2.718014000  | -0.016902000 |
| Fe | -0.495801000 | 0.264800000  | -0.987702000 |
| N  | 0.693100000  | -0.072896000 | -2.572802000 |
| N  | -0.100408000 | 2.235501000  | -1.090002000 |

|    |              |              |              |    |              |              |              |
|----|--------------|--------------|--------------|----|--------------|--------------|--------------|
| N  | -1.754302000 | 0.605096000  | 0.559198000  | C  | 2.869370000  | -4.020463000 | -0.481823000 |
| N  | -0.937195000 | -1.708501000 | -0.898002000 | H  | 3.306531000  | -4.660907000 | -1.234503000 |
| C  | 0.948204000  | -1.276295000 | -3.176302000 | C  | 2.040007000  | -4.361225000 | 0.549655000  |
| C  | 1.882503000  | -1.098392000 | -4.270602000 | H  | 1.650968000  | -5.335564000 | 0.807440000  |
| H  | 2.237206000  | -1.896191000 | -4.907402000 | C  | 1.731361000  | -3.139693000 | 1.264759000  |
| C  | 2.198799000  | 0.228509000  | -4.309602000 | C  | 0.877722000  | -3.055098000 | 2.350286000  |
| H  | 2.867897000  | 0.744311000  | -4.982502000 | C  | 0.520467000  | -1.880483000 | 3.009246000  |
| C  | 1.452897000  | 0.871106000  | -3.246602000 | C  | -0.443394000 | -1.803064000 | 4.089192000  |
| C  | 1.489492000  | 2.220107000  | -2.962902000 | H  | -0.955113000 | -2.654326000 | 4.515451000  |
| C  | 0.750090000  | 2.854004000  | -1.965002000 | C  | -0.569449000 | -0.482897000 | 4.417837000  |
| C  | 0.771886000  | 4.283704000  | -1.717202000 | H  | -1.208045000 | -0.032436000 | 5.163565000  |
| H  | 1.360883000  | 4.992306000  | -2.281702000 | C  | 0.322094000  | 0.256658000  | 3.547858000  |
| C  | -0.080415000 | 4.517701000  | -0.679402000 | C  | 0.465138000  | 1.631568000  | 3.543710000  |
| H  | -0.335718000 | 5.457401000  | -0.212202000 | C  | 1.295261000  | 2.355349000  | 2.690257000  |
| C  | -0.627311000 | 3.234500000  | -0.285702000 | C  | 1.418328000  | 3.801434000  | 2.702277000  |
| C  | -1.528210000 | 3.046197000  | 0.737498000  | H  | 0.888025000  | 4.454031000  | 3.381052000  |
| C  | -2.055306000 | 1.815295000  | 1.128598000  | C  | 2.298850000  | 4.134514000  | 1.714719000  |
| C  | -2.986406000 | 1.636192000  | 2.223098000  | H  | 2.633804000  | 5.116101000  | 1.412844000  |
| H  | -3.391708000 | 2.441790000  | 2.818098000  | C  | 2.720569000  | 2.896642000  | 1.087757000  |
| C  | -3.226701000 | 0.296691000  | 2.325098000  | C  | 3.579705000  | 2.812504000  | 0.011142000  |
| H  | -3.869499000 | -0.222911000 | 3.019798000  | Fe | -0.530400000 | 0.253407000  | -1.007807000 |
| C  | -2.451399000 | -0.351306000 | 1.288898000  | N  | 0.664861000  | -0.042323000 | -2.599627000 |
| C  | -2.426995000 | -1.708006000 | 1.057998000  | N  | -0.181623000 | 2.233326000  | -1.092065000 |
| C  | -1.724092000 | -2.337604000 | 0.030498000  | N  | -1.785399000 | 0.549169000  | 0.550297000  |
| C  | -1.757988000 | -3.763004000 | -0.225002000 | N  | -0.926455000 | -1.731427000 | -0.937125000 |
| H  | -2.317185000 | -4.475906000 | 0.363998000  | C  | 0.945640000  | -1.234573000 | -3.215935000 |
| C  | -0.971087000 | -3.989102000 | -1.318102000 | C  | 1.885626000  | -1.027352000 | -4.299235000 |
| H  | -0.744984000 | -4.926301000 | -1.805502000 | H  | 2.259402000  | -1.810397000 | -4.943405000 |
| C  | -0.450091000 | -2.703200000 | -1.734702000 | C  | 2.179336000  | 0.305991000  | -4.318590000 |
| C  | 0.415208000  | -2.506097000 | -2.790502000 | H  | 2.843677000  | 0.841785000  | -4.980617000 |
| H  | 2.131790000  | 2.842309000  | -3.576202000 | C  | 1.412131000  | 0.921295000  | -3.255092000 |
| H  | -1.862713000 | 3.923795000  | 1.279098000  | C  | 1.418779000  | 2.269395000  | -2.955544000 |
| H  | 0.716711000  | -3.378496000 | -3.360302000 | C  | 0.658147000  | 2.878954000  | -1.959959000 |
| H  | -3.021892000 | -2.336608000 | 1.710598000  | C  | 0.642877000  | 4.306809000  | -1.702794000 |
| H  | 4.029788000  | 3.653615000  | -0.391002000 | H  | 1.216784000  | 5.033844000  | -2.259206000 |
| H  | -0.111908000 | 2.230301000  | 4.243798000  | C  | -0.220984000 | 4.512838000  | -0.668268000 |
| H  | 4.283808000  | -2.532884000 | -2.068602000 | H  | -0.501408000 | 5.442866000  | -0.196283000 |
| H  | 0.276313000  | -3.979197000 | 2.674298000  | C  | -0.735623000 | 3.213921000  | -0.284551000 |
| O  | 0.776700000  | 0.037204000  | 0.059898000  | C  | -1.629626000 | 2.994585000  | 0.739899000  |
| O  | 3.807001000  | -0.444386000 | 2.484198000  | C  | -2.116793000 | 1.747153000  | 1.129958000  |
| O  | -1.959902000 | 0.532295000  | -2.237002000 | C  | -3.027942000 | 1.534262000  | 2.234684000  |
| C  | -3.105804000 | 1.121791000  | -1.890802000 | H  | -3.450459000 | 2.323770000  | 2.839099000  |
| O  | -3.286908000 | 2.358591000  | -1.848602000 | C  | -3.227266000 | 0.187307000  | 2.331412000  |
| C  | -4.204601000 | 0.172588000  | -1.497102000 | H  | -3.847708000 | -0.354656000 | 3.029582000  |
| C  | -4.121996000 | -1.196812000 | -1.787402000 | C  | -2.447241000 | -0.430883000 | 1.281286000  |
| C  | -5.297202000 | 0.672484000  | -0.769602000 | C  | -2.390457000 | -1.785055000 | 1.037097000  |
| C  | -5.125093000 | -2.068115000 | -1.350902000 | C  | -1.686895000 | -2.388900000 | -0.005496000 |
| H  | -3.259795000 | -1.557809000 | -2.333302000 | C  | -1.688312000 | -3.811606000 | -0.273933000 |
| C  | -6.263999000 | -0.219219000 | -0.329402000 | H  | -2.222072000 | -4.544326000 | 0.314246000  |
| H  | -5.349306000 | 1.732784000  | -0.558402000 | C  | -0.908592000 | -4.007501000 | -1.378794000 |
| C  | -6.208795000 | -1.584519000 | -0.604302000 | H  | -0.665143000 | -4.934377000 | -1.877633000 |
| H  | -5.062290000 | -3.127615000 | -1.578102000 | C  | -0.424449000 | -2.705532000 | -1.787583000 |
| H  | -6.987093000 | -2.248622000 | -0.247902000 | C  | 0.434446000  | -2.477581000 | -2.844380000 |
| Cl | -7.681102000 | 0.421776000  | 0.677598000  | H  | 2.052514000  | 2.910897000  | -3.558037000 |
| H  | 3.590302000  | -0.558786000 | 3.432898000  | H  | -1.987337000 | 3.859755000  | 1.286631000  |
| C  | 5.326307000  | -2.295781000 | 2.085598000  | H  | 0.752731000  | -3.337713000 | -3.423770000 |
| H  | 4.520610000  | -3.010883000 | 2.191198000  | H  | -2.961417000 | -2.433938000 | 1.691569000  |
| H  | 5.966407000  | -2.057879000 | 2.926398000  | H  | 3.985994000  | 3.740442000  | -0.376512000 |
| H  | 5.484006000  | -1.810580000 | 1.132998000  | H  | -0.125922000 | 2.195926000  | 4.256794000  |
|    |              |              |              | H  | 4.343484000  | -2.403534000 | -2.092788000 |
|    |              |              |              | H  | 0.423343000  | -3.976690000 | 2.698095000  |
|    |              |              |              | O  | 0.752581000  | 0.042707000  | 0.026395000  |
|    |              |              |              | O  | 3.857299000  | -0.332865000 | 2.488104000  |
|    |              |              |              | O  | -2.011729000 | 0.500038000  | -2.254518000 |
|    |              |              |              | C  | -3.156392000 | 1.079679000  | -1.893627000 |
|    |              |              |              | O  | -3.351115000 | 2.315358000  | -1.858853000 |
|    |              |              |              | C  | -4.237377000 | 0.123283000  | -1.467085000 |
|    |              |              |              | C  | -4.149857000 | -1.247178000 | -1.751471000 |
|    |              |              |              | C  | -5.315130000 | 0.617356000  | -0.714122000 |
|    |              |              |              | C  | -5.132642000 | -2.125039000 | -1.283068000 |
|    |              |              |              | H  | -3.298843000 | -1.603326000 | -2.317750000 |
|    |              |              |              | C  | -6.260669000 | -0.280684000 | -0.241837000 |
|    |              |              |              | H  | -5.372007000 | 1.678541000  | -0.508528000 |
|    |              |              |              | C  | -6.200097000 | -1.647005000 | -0.509820000 |
|    |              |              |              | H  | -5.066326000 | -3.185260000 | -1.505954000 |

### 3-<sup>6</sup>ts<sub>2</sub>(is, is)

|    |             |              |              |
|----|-------------|--------------|--------------|
| Fe | 2.380804000 | -0.137034000 | 1.299377000  |
| N  | 3.525460000 | 0.373265000  | -0.300224000 |
| N  | 2.390829000 | -2.073704000 | 0.671144000  |
| N  | 0.990431000 | -0.623236000 | 2.708001000  |
| N  | 2.099282000 | 1.823069000  | 1.712079000  |
| C  | 3.944460000 | 1.633763000  | -0.642075000 |
| C  | 4.794476000 | 1.574507000  | -1.814752000 |
| H  | 5.257160000 | 2.433152000  | -2.280182000 |
| C  | 4.866311000 | 0.261974000  | -2.187509000 |
| H  | 5.394840000 | -0.173566000 | -3.022946000 |
| C  | 4.066224000 | -0.490126000 | -1.241693000 |
| C  | 3.861950000 | -1.855720000 | -1.290182000 |
| C  | 3.075981000 | -2.588861000 | -0.401940000 |

|    |              |              |              |
|----|--------------|--------------|--------------|
| H  | -6.962015000 | -2.316130000 | -0.128194000 |
| Cl | -7.655204000 | 0.353372000  | 0.800827000  |
| H  | 3.812149000  | -0.929850000 | 3.261202000  |
| C  | 5.367987000  | -2.600337000 | 1.939769000  |
| H  | 4.534676000  | -3.290596000 | 1.882960000  |
| H  | 6.055680000  | -2.640652000 | 2.778067000  |
| H  | 5.477703000  | -1.834067000 | 1.186617000  |

### 3-<sup>4</sup>ts2<sub>(is, is)</sub>

|    |              |              |              |
|----|--------------|--------------|--------------|
| Fe | 2.326443000  | -0.228393000 | 1.157284000  |
| N  | 3.533985000  | 0.088831000  | -0.570227000 |
| N  | 2.170625000  | -2.190889000 | 0.669094000  |
| N  | 0.956917000  | -0.539455000 | 2.786979000  |
| N  | 2.344106000  | 1.730353000  | 1.563096000  |
| C  | 4.055945000  | 1.278460000  | -0.965062000 |
| C  | 4.861142000  | 1.083857000  | -2.168200000 |
| H  | 5.395313000  | 1.862645000  | -2.694711000 |
| C  | 4.794972000  | -0.248522000 | -2.475244000 |
| H  | 5.259238000  | -0.765284000 | -3.303200000 |
| C  | 3.952318000  | -0.874012000 | -1.460822000 |
| C  | 3.599490000  | -2.212879000 | -1.363403000 |
| C  | 2.786741000  | -2.817267000 | -0.381639000 |
| C  | 2.457977000  | -4.233038000 | -0.356775000 |
| H  | 2.815048000  | -4.952904000 | -1.073426000 |
| C  | 1.628731000  | -4.435839000 | 0.712186000  |
| H  | 1.171020000  | -5.358697000 | 1.038289000  |
| C  | 1.441080000  | -3.148818000 | 1.360426000  |
| C  | 0.632100000  | -2.936572000 | 2.473061000  |
| C  | 0.385765000  | -1.722174000 | 3.139709000  |
| C  | -0.528952000 | -1.508387000 | 4.256734000  |
| H  | -1.114487000 | -2.278465000 | 4.739681000  |
| C  | -0.503106000 | -0.168321000 | 4.539399000  |
| H  | -1.064879000 | 0.363897000  | 5.293757000  |
| C  | 0.432357000  | 0.441710000  | 3.602137000  |
| C  | 0.763528000  | 1.785321000  | 3.486012000  |
| C  | 1.642595000  | 2.374091000  | 2.553357000  |
| C  | 1.910575000  | 3.798138000  | 2.477877000  |
| H  | 1.485934000  | 4.537899000  | 3.141658000  |
| C  | 2.761543000  | 3.995741000  | 1.424237000  |
| H  | 3.163915000  | 4.928281000  | 1.055850000  |
| C  | 3.029309000  | 2.696612000  | 0.836173000  |
| C  | 3.809339000  | 2.492110000  | -0.299413000 |
| Fe | -0.488522000 | 0.324194000  | -0.919819000 |
| N  | -1.082563000 | -1.593671000 | -0.651131000 |
| N  | 0.566734000  | -0.228859000 | -2.538764000 |
| N  | 0.064870000  | 2.237381000  | -1.199729000 |
| N  | -1.616830000 | 0.880651000  | 0.658664000  |
| C  | -1.884149000 | -2.079099000 | 0.350958000  |
| C  | -2.061276000 | -3.509484000 | 0.197628000  |
| H  | -2.659167000 | -4.123251000 | 0.856056000  |
| C  | -1.350829000 | -3.881870000 | -0.906416000 |
| H  | -1.235882000 | -4.866450000 | -1.335969000 |
| C  | -0.732597000 | -2.682459000 | -1.435834000 |
| C  | 0.079408000  | -2.641026000 | -2.549680000 |
| C  | 0.686254000  | -1.494130000 | -3.055286000 |
| C  | 1.562919000  | -1.477840000 | -4.211180000 |
| H  | 1.812100000  | -2.349336000 | -4.799614000 |
| C  | 1.980281000  | -0.189931000 | -4.375142000 |
| H  | 2.646032000  | 0.215333000  | -5.122870000 |
| C  | 1.356748000  | 0.593625000  | -3.327255000 |
| C  | 1.524375000  | 1.951307000  | -3.156917000 |
| C  | 0.910026000  | 2.713690000  | -2.167266000 |
| C  | 1.072801000  | 4.149077000  | -2.022698000 |
| H  | 1.683783000  | 4.761488000  | -2.670284000 |
| C  | 0.313755000  | 4.528307000  | -0.955981000 |
| H  | 0.173502000  | 5.516118000  | -0.542271000 |
| C  | -0.317875000 | 3.330092000  | -0.438713000 |
| C  | -1.162693000 | 3.297422000  | 0.647898000  |
| C  | -1.768210000 | 2.151622000  | 1.154606000  |
| C  | -2.646718000 | 2.133868000  | 2.306910000  |
| H  | -2.937304000 | 3.012389000  | 2.864666000  |
| C  | -3.009797000 | 0.835228000  | 2.511476000  |
| H  | -3.656480000 | 0.425698000  | 3.273285000  |
| C  | -2.360627000 | 0.046969000  | 1.484527000  |

|    |              |              |              |
|----|--------------|--------------|--------------|
| C  | -2.480816000 | -1.318585000 | 1.352385000  |
| H  | 0.271785000  | -3.575235000 | -3.065428000 |
| H  | 2.178004000  | 2.467149000  | -3.851097000 |
| H  | -3.102329000 | -1.838568000 | 2.071929000  |
| H  | -1.379116000 | 4.236285000  | 1.144362000  |
| H  | 4.262008000  | 3.381533000  | -0.727747000 |
| H  | 0.283884000  | 2.471268000  | 4.177652000  |
| H  | 3.988409000  | -2.879100000 | -2.127770000 |
| H  | 0.116477000  | -3.811883000 | 2.857133000  |
| O  | 0.823823000  | 0.067867000  | 0.073186000  |
| O  | 3.807625000  | -0.571783000 | 2.220842000  |
| O  | -1.989280000 | 0.596844000  | -2.082671000 |
| C  | -3.138782000 | 1.175015000  | -1.713908000 |
| O  | -3.309002000 | 2.407361000  | -1.604781000 |
| C  | -4.248424000 | 0.210974000  | -1.401467000 |
| C  | -4.136996000 | -1.153348000 | -1.707399000 |
| C  | -5.389282000 | 0.692554000  | -0.737663000 |
| C  | -5.159125000 | -2.037765000 | -1.348495000 |
| H  | -3.240885000 | -1.500262000 | -2.204738000 |
| C  | -6.378429000 | -0.211131000 | -0.379841000 |
| H  | -5.460984000 | 1.748833000  | -0.511505000 |
| C  | -6.294282000 | -1.571908000 | -0.670719000 |
| H  | -5.071401000 | -3.093491000 | -1.583622000 |
| H  | -7.090041000 | -2.246192000 | -0.377501000 |
| Cl | -7.868971000 | 0.405576000  | 0.530805000  |
| H  | 3.672439000  | -0.363088000 | 3.169625000  |
| C  | 5.237304000  | -2.582261000 | 2.468616000  |
| H  | 6.028002000  | -2.029720000 | 1.978494000  |
| H  | 4.461419000  | -3.049901000 | 1.878341000  |
| H  | 5.202461000  | -2.633786000 | 3.551361000  |

### 3-<sup>2</sup>ts2<sub>(is, is)</sub>

|    |              |              |              |
|----|--------------|--------------|--------------|
| Fe | 2.399950000  | -0.619095000 | 1.027586000  |
| N  | 3.540381000  | 0.292905000  | -0.356628000 |
| N  | 2.310073000  | -2.287449000 | -0.151026000 |
| N  | 1.035831000  | -1.439833000 | 2.281812000  |
| N  | 2.281537000  | 1.143044000  | 2.081857000  |
| C  | 4.007662000  | 1.583975000  | -0.320646000 |
| C  | 4.844320000  | 1.839076000  | -1.479099000 |
| H  | 5.336447000  | 2.779884000  | -1.680760000 |
| C  | 4.863799000  | 0.692595000  | -2.218479000 |
| H  | 5.371005000  | 0.501422000  | -3.152884000 |
| C  | 4.041237000  | -0.276983000 | -1.521200000 |
| C  | 3.781459000  | -1.555186000 | -1.973475000 |
| C  | 2.965152000  | -2.491827000 | -1.335298000 |
| C  | 2.671415000  | -3.819272000 | -1.843271000 |
| H  | 3.069203000  | -4.227076000 | -2.761679000 |
| C  | 1.820225000  | -4.406203000 | -0.950261000 |
| H  | 1.373128000  | -5.388778000 | -0.991710000 |
| C  | 1.589593000  | -3.442258000 | 0.109197000  |
| C  | 0.761404000  | -3.637104000 | 1.197352000  |
| C  | 0.500640000  | -2.700917000 | 2.200642000  |
| C  | -0.401476000 | -2.928025000 | 3.311583000  |
| H  | -0.944265000 | -3.847009000 | 3.480601000  |
| C  | -0.418714000 | -1.780069000 | 4.052348000  |
| H  | -0.985575000 | -1.563611000 | 4.946151000  |
| C  | 0.475436000  | -0.842441000 | 3.402609000  |
| C  | 0.699888000  | 0.454579000  | 3.829825000  |
| C  | 1.529629000  | 1.384973000  | 3.204686000  |
| C  | 1.698786000  | 2.763622000  | 3.626067000  |
| H  | 1.216506000  | 3.205985000  | 4.486242000  |
| C  | 2.545408000  | 3.352841000  | 2.729981000  |
| H  | 2.892779000  | 4.375418000  | 2.704583000  |
| C  | 2.902598000  | 2.338501000  | 1.756628000  |
| C  | 3.711221000  | 2.537932000  | 0.653381000  |
| Fe | -0.486040000 | 0.590006000  | -0.902384000 |
| N  | -1.001753000 | -1.319975000 | -1.329151000 |
| N  | 0.645737000  | 0.657715000  | -2.560684000 |
| N  | -0.019175000 | 2.504989000  | -0.488361000 |
| N  | -1.680204000 | 0.533053000  | 0.732446000  |
| C  | -1.783745000 | -2.153822000 | -0.573910000 |
| C  | -1.896443000 | -3.448925000 | -1.212508000 |
| H  | -2.469031000 | -4.276133000 | -0.818135000 |
| C  | -1.160629000 | -3.390202000 | -2.361527000 |

|    |              |              |              |    |              |              |              |
|----|--------------|--------------|--------------|----|--------------|--------------|--------------|
| H  | -0.997821000 | -4.162077000 | -3.099618000 | C  | 1.518163000  | 2.458960000  | 2.618789000  |
| C  | -0.591820000 | -2.059590000 | -2.429628000 | C  | 1.649964000  | 3.903220000  | 2.533681000  |
| C  | 0.254301000  | -1.611971000 | -3.422690000 | H  | 1.155058000  | 4.604495000  | 3.190516000  |
| C  | 0.835627000  | -0.345155000 | -3.475019000 | C  | 2.490152000  | 4.171522000  | 1.487613000  |
| C  | 1.756380000  | 0.088650000  | -4.507832000 | H  | 2.815616000  | 5.135065000  | 1.121781000  |
| H  | 2.063475000  | -0.518779000 | -5.347190000 | C  | 2.883179000  | 2.895853000  | 0.913985000  |
| C  | 2.128615000  | 1.364180000  | -4.196734000 | C  | 3.706586000  | 2.726179000  | -0.198111000 |
| H  | 2.804848000  | 2.019144000  | -4.726356000 | C  | 4.057169000  | 1.522433000  | -0.808966000 |
| C  | 1.430590000  | 1.722059000  | -2.978303000 | C  | 4.844562000  | 1.387933000  | -2.019937000 |
| C  | 1.526926000  | 2.943393000  | -2.345535000 | H  | 5.280798000  | 2.214397000  | -2.562986000 |
| C  | 0.833840000  | 3.309688000  | -1.192115000 | C  | 4.895251000  | 0.053741000  | -2.326289000 |
| C  | 0.918625000  | 4.617439000  | -0.567600000 | H  | 5.381704000  | -0.420362000 | -3.167082000 |
| H  | 1.521404000  | 5.433686000  | -0.939119000 | C  | 4.141233000  | -0.650175000 | -1.306433000 |
| C  | 0.101147000  | 4.588147000  | 0.522966000  | C  | 3.904615000  | -2.024153000 | -1.268710000 |
| H  | -0.104865000 | 5.373302000  | 1.235473000  | Fe | -0.693541000 | 0.180858000  | -1.157234000 |
| C  | -0.485194000 | 3.263323000  | 0.575097000  | N  | 0.375189000  | -0.981005000 | -2.483766000 |
| C  | -1.356598000 | 2.829204000  | 1.547773000  | N  | 0.284513000  | 1.869627000  | -1.852330000 |
| C  | -1.907453000 | 1.549630000  | 1.622813000  | N  | -1.493088000 | 1.301991000  | 0.408170000  |
| C  | -2.783911000 | 1.098473000  | 2.684299000  | N  | -1.343488000 | -1.555181000 | -0.192955000 |
| H  | -3.128233000 | 1.720593000  | 3.497688000  | C  | 0.339414000  | -2.360340000 | -2.579654000 |
| C  | -3.065076000 | -0.213961000 | 2.436767000  | C  | 1.210812000  | -2.777046000 | -3.660207000 |
| H  | -3.688523000 | -0.889734000 | 3.003243000  | H  | 1.365127000  | -3.803239000 | -3.963603000 |
| C  | -2.371257000 | -0.571037000 | 1.217175000  | C  | 1.779039000  | -1.644989000 | -4.185339000 |
| C  | -2.412882000 | -1.812331000 | 0.623650000  | H  | 2.484193000  | -1.569671000 | -5.001403000 |
| H  | 0.500887000  | -2.304679000 | -4.219876000 | C  | 1.260217000  | -0.515731000 | -3.439654000 |
| H  | 2.181775000  | 3.685632000  | -2.788459000 | C  | 1.619059000  | 0.817723000  | -3.635525000 |
| H  | -3.001805000 | -2.580081000 | 1.112069000  | C  | 1.175749000  | 1.918353000  | -2.901851000 |
| H  | -1.636259000 | 3.535651000  | 2.321015000  | C  | 1.580511000  | 3.297237000  | -3.110023000 |
| H  | 4.138054000  | 3.526238000  | 0.520528000  | H  | 2.268457000  | 3.626819000  | -3.876053000 |
| H  | 0.165090000  | 0.782720000  | 4.714702000  | C  | 0.925891000  | 4.056723000  | -2.176588000 |
| H  | 4.236662000  | -1.851601000 | -2.912132000 | H  | 0.975917000  | 5.126792000  | -2.031743000 |
| H  | 0.253456000  | -4.592440000 | 1.272373000  | C  | 0.114730000  | 3.154442000  | -1.379310000 |
| O  | 0.791503000  | 0.066635000  | 0.012579000  | C  | -0.679180000 | 3.522067000  | -0.294942000 |
| O  | 3.901218000  | -1.248758000 | 2.028801000  | C  | -1.412392000 | 2.672864000  | 0.534442000  |
| O  | -1.981158000 | 1.227059000  | -1.974983000 | C  | -2.174516000 | 3.081460000  | 1.698351000  |
| C  | -3.106689000 | 1.692305000  | -1.430063000 | H  | -2.294972000 | 4.104757000  | 2.024926000  |
| O  | -3.267841000 | 2.861802000  | -1.016621000 | C  | -2.691040000 | 1.945485000  | 2.265750000  |
| C  | -4.205525000 | 0.673597000  | -1.296158000 | H  | -3.316028000 | 1.862573000  | 3.143840000  |
| C  | -4.149418000 | -0.550000000 | -1.978931000 | C  | -2.253868000 | 0.824593000  | 1.456010000  |
| C  | -5.268538000 | 0.940687000  | -0.417696000 | C  | -2.538425000 | -0.518401000 | 1.702202000  |
| C  | -5.149378000 | -1.508331000 | -1.785002000 | C  | -2.111784000 | -1.614033000 | 0.953173000  |
| H  | -3.307942000 | -0.736514000 | -2.633542000 | C  | -2.416237000 | -3.001375000 | 1.242123000  |
| C  | -6.231877000 | -0.038582000 | -0.226935000 | H  | -3.013136000 | -3.336563000 | 2.078838000  |
| H  | -5.300598000 | 1.892117000  | 0.097487000  | C  | -1.819712000 | -3.760489000 | 0.268274000  |
| C  | -6.202841000 | -1.262565000 | -0.893194000 | H  | -1.830352000 | -4.836251000 | 0.159899000  |
| H  | -5.106168000 | -2.454530000 | -2.314870000 | C  | -1.138137000 | -2.847667000 | -0.629895000 |
| H  | -6.978149000 | -1.999780000 | -0.721705000 | C  | -0.375254000 | -3.213937000 | -1.739955000 |
| Cl | -7.608445000 | 0.280889000  | 0.971782000  | H  | 2.335185000  | 1.016480000  | -4.425719000 |
| H  | 4.066563000  | -0.895998000 | 2.926229000  | H  | -0.708474000 | 4.578797000  | -0.051981000 |
| C  | 3.245306000  | -3.239245000 | 3.881145000  | H  | -0.294609000 | -4.276310000 | -1.945111000 |
| H  | 2.365484000  | -2.760546000 | 4.294473000  | H  | -3.146162000 | -0.733510000 | 2.574443000  |
| H  | 4.139195000  | -3.354268000 | 4.485560000  | H  | 4.324772000  | -2.610208000 | -2.079135000 |
| H  | 3.247833000  | -3.549232000 | 2.846753000  | H  | 4.081134000  | 3.631158000  | -0.664625000 |

### $3^{-10}\text{P}_{(\text{hs}, \text{hs})}$

|    |              |              |              |    |              |              |              |
|----|--------------|--------------|--------------|----|--------------|--------------|--------------|
| Fe | 2.267513000  | -0.112231000 | 1.084762000  | H  | 0.499231000  | -3.882677000 | 2.896543000  |
| N  | 2.509436000  | -2.154982000 | 0.763092000  | H  | 0.158010000  | 2.370325000  | 4.235757000  |
| N  | 1.198872000  | -0.551300000 | 2.830535000  | O  | 0.938013000  | 0.016704000  | 0.093057000  |
| N  | 2.286341000  | 1.879388000  | 1.630727000  | O  | 3.943825000  | -0.318221000 | 2.460581000  |
| N  | 3.668510000  | 0.265871000  | -0.385786000 | O  | -2.286525000 | 0.408735000  | -2.187317000 |
| C  | 3.140222000  | -2.718001000 | -0.331125000 | C  | -3.438960000 | 1.025965000  | -1.873058000 |
| C  | 2.861822000  | -4.141790000 | -0.354369000 | O  | -3.617725000 | 2.252795000  | -1.990897000 |
| H  | 3.233447000  | -4.827327000 | -1.102791000 | C  | -4.502142000 | 0.121177000  | -1.325806000 |
| C  | 2.048214000  | -4.414118000 | 0.712920000  | C  | -4.352613000 | -1.273501000 | -1.333833000 |
| H  | 1.626420000  | -5.365246000 | 1.005594000  | C  | -5.648695000 | 0.704607000  | -0.760214000 |
| C  | 1.815420000  | -3.161490000 | 1.407289000  | C  | -5.341389000 | -2.086386000 | -0.770740000 |
| C  | 0.995955000  | -2.993279000 | 2.523659000  | H  | -3.454319000 | -1.699016000 | -1.760550000 |
| C  | 0.688602000  | -1.794937000 | 3.166970000  | C  | -6.607416000 | -0.127331000 | -0.202339000 |
| C  | -0.256252000 | -1.637643000 | 4.254676000  | H  | -5.750072000 | 1.782539000  | -0.764932000 |
| H  | -0.798272000 | -2.449492000 | 4.718829000  | C  | -6.483355000 | -1.515981000 | -0.192574000 |
| C  | -0.333223000 | -0.299117000 | 4.537226000  | H  | -5.219347000 | -3.164238000 | -0.767336000 |
| H  | -0.950451000 | 0.191719000  | 5.276394000  | H  | -7.254842000 | -2.132200000 | 0.253441000  |
| C  | 0.564311000  | 0.386358000  | 3.628938000  | Cl | -8.110785000 | 0.629455000  | 0.569675000  |
| C  | 0.731518000  | 1.767762000  | 3.539527000  | H  | 3.513642000  | -0.649061000 | 3.275305000  |
|    |              |              |              | C  | 5.134634000  | -1.091309000 | 2.094616000  |
|    |              |              |              | H  | 5.512178000  | -0.621668000 | 1.188120000  |
|    |              |              |              | H  | 5.875727000  | -1.024268000 | 2.897664000  |

H 4.865399000 -2.131274000 1.887154000

**3-<sup>2</sup>P**<sub>(hs, hs)</sub>

Fe 2.181257000 -0.117228000 1.142850000  
N 2.589591000 -2.141480000 0.758109000  
N 1.061070000 -0.710107000 2.822388000  
N 2.078792000 1.853376000 1.800473000  
N 3.660481000 0.413786000 -0.218303000  
C 3.317872000 -2.609181000 -0.313822000  
C 3.125055000 -4.047641000 -0.422961000  
H 3.585534000 -4.676538000 -1.172484000  
C 2.264680000 -4.417713000 0.576476000  
H 1.882575000 -5.404811000 0.795389000  
C 1.917846000 -3.212729000 1.313656000  
C 1.020643000 -3.140540000 2.381637000  
C 0.605289000 -1.990467000 3.063896000  
C -0.415655000 -1.939032000 4.097747000  
H -0.938513000 -2.799761000 4.491316000  
C -0.580723000 -0.622704000 4.440418000  
H -1.268785000 -0.203599000 5.160774000  
C 0.337096000 0.154535000 3.624975000  
C 0.440618000 1.546832000 3.616199000  
C 1.244278000 2.332466000 2.781515000  
C 1.312096000 3.788122000 2.789251000  
H 0.759880000 4.427915000 3.463575000  
C 2.186935000 4.156199000 1.803510000  
H 2.481581000 5.154272000 1.511862000  
C 2.666638000 2.932832000 1.175809000  
C 3.551568000 2.860216000 0.099041000  
C 4.001134000 1.705749000 -0.553171000  
C 4.867168000 1.674771000 -1.722069000  
H 5.292788000 2.547913000 -2.197071000  
C 5.015038000 0.361547000 -2.083058000  
H 5.579137000 -0.042114000 -2.911987000  
C 4.244313000 -0.433149000 -1.140412000  
C 4.090737000 -1.820695000 -1.174315000  
Fe -0.566006000 0.169831000 -1.133243000  
N 0.689739000 -0.147845000 -2.759615000  
N -0.211821000 2.228916000 -1.228754000  
N -1.882067000 0.487913000 0.482078000  
N -0.960353000 -1.888080000 -1.025726000  
C 1.050751000 -1.364230000 -3.274631000  
C 2.059422000 -1.162100000 -4.301982000  
H 2.521341000 -1.949208000 -4.881206000  
C 2.297913000 0.186804000 -4.370524000  
H 2.994674000 0.707522000 -5.011464000  
C 1.436937000 0.822975000 -3.387340000  
C 1.392608000 2.191055000 -3.089527000  
C 0.628580000 2.849269000 -2.109335000  
C 0.617348000 4.282771000 -1.846692000  
H 1.187031000 5.018193000 -2.396928000  
C -0.241707000 4.490658000 -0.801633000  
H -0.507113000 5.427227000 -0.333257000  
C -0.764114000 3.188535000 -0.413348000  
C -1.665093000 2.934905000 0.621538000  
C -2.182178000 1.694057000 1.047298000  
C -3.084245000 1.484171000 2.168507000  
H -3.498187000 2.268095000 2.786429000  
C -3.296838000 0.133746000 2.265065000  
H -3.916844000 -0.393094000 2.975550000  
C -2.530526000 -0.494728000 1.202340000  
C -2.442827000 -1.861577000 0.942278000  
C -1.712216000 -2.515050000 -0.071388000  
C -1.613029000 -3.952865000 -0.256374000  
H -2.111808000 -4.692345000 0.354242000  
C -0.773486000 -4.164107000 -1.321044000  
H -0.453464000 -5.107727000 -1.739230000  
C -0.354208000 -2.857105000 -1.797830000  
C 0.556491000 -2.604576000 -2.829492000  
H 2.040631000 2.824999000 -3.687911000  
H -2.010439000 3.803405000 1.174132000  
H 0.957631000 -3.480313000 -3.331847000  
H -3.003422000 -2.508074000 1.610632000  
H 4.602910000 -2.342509000 -1.976925000

H 3.912869000 3.806083000 -0.292840000  
H 0.560965000 -4.075042000 2.688461000  
H -0.193282000 2.080444000 4.317724000  
O 0.807485000 -0.034977000 0.031796000  
O 3.888707000 -0.334007000 2.699240000  
O -2.165396000 0.482922000 -2.379926000  
C -3.276097000 1.087668000 -1.993368000  
O -3.452397000 2.331154000 -1.962884000  
C -4.353096000 0.161370000 -1.482218000  
C -4.291223000 -1.220172000 -1.714773000  
C -5.388164000 0.694431000 -0.697459000  
C -5.254783000 -2.070343000 -1.162751000  
H -3.468947000 -1.604506000 -2.304999000  
C -6.315895000 -0.175605000 -0.143550000  
H -5.424415000 1.763485000 -0.532007000  
C -6.279446000 -1.551857000 -0.357306000  
H -5.208318000 -3.139415000 -1.346060000  
H -7.026607000 -2.197718000 0.088276000  
Cl -7.652991000 0.512920000 0.942029000  
H 3.403690000 -0.812675000 3.401389000  
C 5.118832000 -1.022415000 2.308641000  
H 5.832841000 -1.028174000 3.140181000  
H 4.902615000 -2.041544000 1.971875000  
H 5.516534000 -0.444410000 1.475249000

**3-<sup>6</sup>P**<sub>(is, is)</sub>

Fe 2.340273620 -0.123844373 1.070656567  
N 3.530240776 0.702889963 -0.326016456  
N 2.749581120 -1.958897609 0.322004988  
N 1.341876873 -0.986772829 2.607836877  
N 2.045634316 1.680890653 1.900221255  
C 3.770032467 2.056069035 -0.508543174  
C 4.548130661 2.257397837 -1.708268257  
H 4.868365152 3.223274658 -2.071591159  
C 4.755549521 1.025363895 -2.264990107  
H 5.281944473 0.777858192 -3.175683764  
C 4.109766711 0.057945822 -1.409006288  
C 4.063856134 -1.304069905 -1.657626788  
C 3.423952615 -2.236137374 -0.856806923  
C 3.364642958 -3.652424612 -1.132735800  
H 3.811031945 -4.124411760 -1.996118677  
C 2.645117848 -4.229197422 -0.122278109  
H 2.381993626 -5.269012264 0.008787466  
C 2.253911512 -3.170287553 0.778788781  
C 1.477342592 -3.351350047 1.912607374  
C 1.043513198 -2.336330255 2.750088881  
C 0.1623557040 -2.524940964 3.878535483  
H -0.214506931 -3.483924442 4.202619924  
C -0.095167606 -1.286482964 4.399812851  
H -0.726249556 -1.027822532 5.237961546  
C 0.627556919 -0.327714939 3.599000411  
C 0.581207946 1.044961636 3.779672769  
C 1.240166301 1.971568170 2.988654495  
C 1.182530014 3.402387975 3.186641474  
H 0.615445629 3.886550026 3.968528012  
C 1.955334759 3.973553407 2.215025435  
H 2.150251780 5.021407928 2.037716052  
C 2.488219895 2.897803085 1.409867381  
C 3.298128378 3.076283332 0.300818928  
Fe -0.603747229 0.173440662 -0.972395644  
N 0.362920482 -0.591991943 -2.556903916  
N -0.040145532 2.028228745 -1.507474325  
N -1.632047550 0.936552151 0.589454618  
N -1.179381531 -1.690664742 -0.424241963  
C 0.450329100 -1.925136349 -2.910383634  
C 1.285307333 -2.063721568 -4.084060846  
H 1.504545112 -3.005490830 -4.567185678  
C 1.708287958 -0.809726457 -4.425190176  
H 2.343171791 -0.511433724 -5.247601673  
C 1.130423608 0.107897274 -3.467346398  
C 1.332258066 1.477819973 -3.474253669  
C 0.781059005 2.363095781 -2.563951885  
C 0.982958313 3.797212185 -2.589270323  
H 1.580853567 4.314833965 -3.325928102

|    |              |              |              |    |              |              |              |
|----|--------------|--------------|--------------|----|--------------|--------------|--------------|
| C  | 0.272490045  | 4.318379558  | -1.546212688 | C  | 0.651228637  | 1.102674606  | 3.766905146  |
| H  | 0.166368299  | 5.352184106  | -1.249754416 | C  | 1.298282796  | 2.018824403  | 2.953096980  |
| C  | -0.363927573 | 3.207604757  | -0.869780190 | C  | 1.257244227  | 3.452573764  | 3.140881549  |
| C  | -1.155630569 | 3.329275963  | 0.257429979  | H  | 0.714301379  | 3.947936069  | 3.932897020  |
| C  | -1.736158760 | 2.271136935  | 0.934000400  | C  | 2.011583744  | 4.009137778  | 2.146901463  |
| C  | -2.520429490 | 2.402864366  | 2.140862889  | H  | 2.212435255  | 5.053804280  | 1.957494188  |
| H  | -2.763081506 | 3.346548583  | 2.608123977  | C  | 2.516786507  | 2.921600625  | 1.337986150  |
| C  | -2.873211869 | 1.141252903  | 2.530562922  | C  | 3.304224638  | 3.082681481  | 0.209617921  |
| H  | -3.467502860 | 0.838254551  | 3.380854150  | Fe | -0.597729722 | 0.153389017  | -0.931940313 |
| C  | -2.310746440 | 0.225722084  | 1.563288142  | N  | -1.169743896 | -1.703967173 | -0.354355306 |
| C  | -2.437047222 | -1.150858999 | 1.622452831  | N  | 0.335791673  | -0.632313366 | -2.528306807 |
| C  | -1.909357532 | -2.034739498 | 0.697120497  | N  | -0.056476205 | 2.002235887  | -1.509110399 |
| C  | -2.079883599 | -3.469689801 | 0.746690646  | N  | -1.606944138 | 0.936951606  | 0.631655879  |
| H  | -2.623504487 | -3.991405286 | 1.521616265  | C  | -1.892384765 | -2.032583191 | 0.776144044  |
| C  | -1.449070477 | -3.986311346 | -0.351179050 | C  | -2.064647983 | -3.466463413 | 0.844549188  |
| H  | -1.365166752 | -5.019414718 | -0.658209141 | H  | -2.602827082 | -3.977698442 | 1.630129542  |
| C  | -0.881600063 | -2.870734341 | -1.077391819 | C  | -1.441685618 | -3.997679381 | -0.250702837 |
| C  | -0.134524754 | -2.985002891 | -2.238353415 | H  | -1.360743412 | -5.034640042 | -0.545085439 |
| H  | 1.967805942  | 1.887450668  | -4.251147107 | C  | -0.878559336 | -2.892328429 | -0.995429645 |
| H  | -1.326592509 | 4.326501688  | 0.645932610  | C  | -0.145565604 | -3.021967780 | -2.163547443 |
| H  | 0.027494383  | -3.980911257 | -2.635340674 | C  | 0.422854507  | -1.970360244 | -2.861908437 |
| H  | -2.999636643 | -1.567134393 | 2.449976223  | C  | 1.231420647  | -2.122812950 | -4.052228998 |
| H  | 3.548690726  | 4.093140004  | 0.021754363  | H  | 1.446053484  | -3.071145513 | -4.524337101 |
| H  | -0.036980693 | 1.423723787  | 4.585156034  | C  | 1.636694933  | -0.872060124 | -4.424404967 |
| H  | 4.540178291  | -1.664327590 | -2.561927231 | H  | 2.250101848  | -0.583106470 | -5.266141435 |
| H  | 1.144800221  | -4.358689223 | 2.135009094  | C  | 1.075726233  | 0.057598189  | -3.468197299 |
| O  | 0.785940808  | 0.025674388  | -0.008920648 | C  | 1.267507361  | 1.428464331  | -3.502603467 |
| O  | 4.147124534  | -0.417434698 | 2.401784818  | C  | 0.734517347  | 2.324499079  | -2.592355807 |
| O  | -2.166872708 | 0.329593346  | -2.053112924 | C  | 0.929875929  | 3.758676148  | -2.643246709 |
| C  | -3.295632371 | 0.977210903  | -1.734945733 | H  | 1.506070884  | 4.267556031  | -3.402848359 |
| O  | -3.445889764 | 2.213140934  | -1.816424874 | C  | 0.247492738  | 4.292007148  | -1.587906955 |
| C  | -4.405473519 | 0.090914370  | -1.245733934 | H  | 0.146705889  | 5.329334391  | -1.302294208 |
| C  | -4.305446699 | -1.306724634 | -1.308844031 | C  | -0.366678506 | 3.189231231  | -0.878980821 |
| C  | -5.541248976 | 0.691008886  | -0.676129771 | C  | -1.131086397 | 3.324804574  | 0.265113199  |
| C  | -5.333964745 | -2.106015409 | -0.799776634 | C  | -1.700543290 | 2.275410063  | 0.963755291  |
| H  | -3.413395280 | -1.742727697 | -1.738214582 | C  | -2.467825673 | 2.422340063  | 2.179632828  |
| C  | -6.538408518 | -0.128149044 | -0.169357471 | H  | -2.699110030 | 3.371774410  | 2.640886943  |
| H  | -5.603520333 | 1.771144589  | -0.638312754 | C  | -2.822563500 | 1.166668884  | 2.585543534  |
| C  | -6.465635216 | -1.519500005 | -0.216925947 | H  | -3.406709533 | 0.874703724  | 3.446617880  |
| H  | -5.253338532 | -3.187302708 | -0.844110749 | C  | -2.277086359 | 0.238628055  | 1.620574130  |
| H  | -7.267220583 | -2.125137006 | 0.188722306  | C  | -2.408827178 | -1.136451704 | 1.695951894  |
| Cl | -8.028351937 | 0.650722289  | 0.611495353  | H  | 0.013689551  | -4.023151402 | -2.547941818 |
| H  | 3.806626460  | -0.981281525 | 3.124374484  | H  | 1.880959145  | 1.829436104  | -4.301344655 |
| C  | 5.372165256  | -0.958734537 | 1.805878371  | H  | -2.963382820 | -1.541384395 | 2.534384630  |
| H  | 6.174082523  | -0.983682111 | 2.551279418  | H  | -1.292118061 | 4.326443103  | 0.646128337  |
| H  | 5.625092825  | -0.269611266 | 1.001247790  | H  | 3.555907682  | 4.095062690  | -0.084589981 |
| H  | 5.189694109  | -1.954862685 | 1.389735102  | H  | 0.053161701  | 1.493090690  | 4.582047864  |

### 3-<sup>2</sup>P<sub>(is, is)</sub>

|    |              |              |              |   |             |              |             |
|----|--------------|--------------|--------------|---|-------------|--------------|-------------|
| Fe | 2.324311126  | -0.102727114 | 1.018977731  | C | 5.201639788 | -1.915160516 | 1.328692067 |
| N  | 3.517222899  | 0.702231979  | -0.394791470 |   |             |              |             |
| N  | 2.754617697  | -1.954604425 | 0.311432557  |   |             |              |             |
| N  | 1.380027467  | -0.947280865 | 2.607004936  |   |             |              |             |
| N  | 2.074630985  | 1.714471077  | 1.848878065  |   |             |              |             |
| C  | 3.758188040  | 2.051320897  | -0.596796063 |   |             |              |             |
| C  | 4.522813970  | 2.234125860  | -1.809182527 |   |             |              |             |
| H  | 4.842374432  | 3.193899436  | -2.189032656 |   |             |              |             |
| C  | 4.721764676  | 0.994033406  | -2.350374465 |   |             |              |             |
| H  | 5.239275588  | 0.732340698  | -3.262233370 |   |             |              |             |
| C  | 4.084207862  | 0.039661969  | -1.472462302 |   |             |              |             |
| C  | 4.040437511  | -1.327497328 | -1.695198531 |   |             |              |             |
| C  | 3.418299372  | -2.249367123 | -0.868170147 |   |             |              |             |
| C  | 3.370676738  | -3.672806456 | -1.112174380 |   |             |              |             |
| H  | 3.813238307  | -4.159514828 | -1.969396295 |   |             |              |             |
| C  | 2.668661907  | -4.234189569 | -0.081272126 |   |             |              |             |
| H  | 2.419005013  | -5.273711692 | 0.076255767  |   |             |              |             |
| C  | 2.276361751  | -3.158992243 | 0.801279788  |   |             |              |             |
| C  | 1.514752809  | -3.321824766 | 1.948559750  |   |             |              |             |
| C  | 1.088317260  | -2.294293912 | 2.775515859  |   |             |              |             |
| C  | 0.230662319  | -2.466235003 | 3.924518795  |   |             |              |             |
| H  | -0.138691506 | -3.420504872 | 4.271869202  |   |             |              |             |
| C  | -0.018217035 | -1.220326774 | 4.432309399  |   |             |              |             |
| H  | -0.631012008 | -0.949695173 | 5.280238389  |   |             |              |             |
| C  | 0.688018368  | -0.272847785 | 3.602515074  |   |             |              |             |

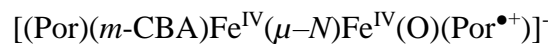

(4)

$^{10}4_{(hs, hs)}$  OR  $4^{-10}R_{(hs, hs)}$ 

|    |              |              |              |
|----|--------------|--------------|--------------|
| Fe | 0.481464000  | -0.036211000 | -1.074647000 |
| N  | -1.101181000 | 0.024137000  | 0.212667000  |
| N  | 1.193770000  | 1.609182000  | -0.006854000 |
| N  | -0.523235000 | 1.241195000  | -2.358394000 |
| N  | -0.477205000 | -1.662526000 | -1.925451000 |
| N  | 1.358954000  | -1.302572000 | 0.349759000  |
| C  | 1.006226000  | 2.932621000  | -0.347550000 |
| C  | 1.722327000  | 3.761992000  | 0.603021000  |
| H  | 1.746495000  | 4.843011000  | 0.579811000  |
| C  | 2.319980000  | 2.920901000  | 1.507983000  |
| H  | 2.930005000  | 3.183294000  | 2.361327000  |
| C  | 1.983802000  | 1.564453000  | 1.124078000  |
| C  | 2.413019000  | 0.406169000  | 1.775376000  |
| H  | 3.023258000  | 0.549565000  | 2.660604000  |
| C  | 2.126173000  | -0.914024000 | 1.424593000  |
| C  | 2.559443000  | -2.102178000 | 2.140777000  |
| H  | 3.179524000  | -2.094130000 | 3.026413000  |
| C  | 2.026250000  | -3.183414000 | 1.490340000  |
| H  | 2.125632000  | -4.230034000 | 1.742419000  |
| C  | 1.258261000  | -2.674322000 | 0.366523000  |
| C  | 0.501911000  | -3.441797000 | -0.521611000 |
| H  | 0.517798000  | -4.515092000 | -0.364364000 |
| C  | -0.299854000 | -2.981347000 | -1.567252000 |
| C  | -1.096444000 | -3.811853000 | -2.452390000 |
| H  | -1.148233000 | -4.890626000 | -2.400173000 |
| C  | -1.742359000 | -2.974808000 | -3.324964000 |
| H  | -2.423685000 | -3.238495000 | -4.122249000 |
| C  | -1.348410000 | -1.617661000 | -2.990703000 |
| C  | -1.774302000 | -0.456975000 | -3.641525000 |
| H  | -2.490165000 | -0.589389000 | -4.446201000 |
| C  | -1.405405000 | 0.857401000  | -3.347105000 |
| C  | -1.914550000 | 2.048279000  | -4.003280000 |
| H  | -2.626031000 | 2.044515000  | -4.817815000 |
| C  | -1.343988000 | 3.130194000  | -3.383867000 |
| H  | -1.501326000 | 4.179290000  | -3.594468000 |
| C  | -0.477679000 | 2.619566000  | -2.336568000 |
| C  | 0.242299000  | 3.393005000  | -1.423917000 |
| H  | 0.165521000  | 4.469797000  | -1.535583000 |
| Fe | -2.589084000 | 0.077793000  | 1.425071000  |
| N  | -2.531752000 | 2.126429000  | 1.015911000  |
| N  | -1.153098000 | 0.355169000  | 2.915393000  |
| N  | -2.323732000 | -1.987479000 | 1.580374000  |
| N  | -3.708771000 | -0.217801000 | -0.314884000 |
| C  | -1.837739000 | 3.072489000  | 1.734715000  |
| C  | -2.100727000 | 4.381866000  | 1.157129000  |
| H  | -1.680732000 | 5.309844000  | 1.521104000  |
| C  | -2.938309000 | 4.192406000  | 0.090038000  |
| H  | -3.336622000 | 4.935387000  | -0.587709000 |
| C  | -3.202772000 | 2.764329000  | -0.001097000 |
| C  | -3.982606000 | 2.141051000  | -0.977909000 |
| H  | -4.430284000 | 2.789668000  | -1.724544000 |
| C  | -4.210396000 | 0.771168000  | -1.128209000 |
| C  | -4.984616000 | 0.151008000  | -2.192857000 |
| H  | -5.492124000 | 0.693084000  | -2.979439000 |
| C  | -4.920590000 | -1.204088000 | -2.003454000 |
| H  | -5.364129000 | -1.985281000 | -2.605949000 |
| C  | -4.104576000 | -1.434504000 | -0.821201000 |
| C  | -3.750438000 | -2.682846000 | -0.306202000 |
| H  | -4.129029000 | -3.549645000 | -0.838930000 |
| C  | -2.924109000 | -2.939680000 | 0.790098000  |
| C  | -2.531888000 | -4.257217000 | 1.266614000  |
| H  | -2.854670000 | -5.191414000 | 0.827147000  |
| C  | -1.691852000 | -4.068112000 | 2.331993000  |
| H  | -1.193982000 | -4.817686000 | 2.932225000  |
| C  | -1.557381000 | -2.632129000 | 2.523450000  |
| C  | -0.758799000 | -2.010391000 | 3.485679000  |
| H  | -0.198692000 | -2.666053000 | 4.145114000  |
| C  | -0.566058000 | -0.638874000 | 3.663204000  |
| C  | 0.316218000  | -0.025567000 | 4.644051000  |
| H  | 0.910079000  | -0.572475000 | 5.364018000  |
| C  | 0.249171000  | 1.329808000  | 4.456705000  |
| H  | 0.777295000  | 2.106074000  | 4.993987000  |
| C  | -0.674846000 | 1.566148000  | 3.357989000  |

|    |              |              |              |
|----|--------------|--------------|--------------|
| C  | -0.996400000 | 2.813644000  | 2.818292000  |
| H  | -0.509877000 | 3.673703000  | 3.267811000  |
| O  | -3.920368000 | 0.149048000  | 2.471204000  |
| O  | 2.108357000  | -0.201518000 | -2.193392000 |
| C  | 3.241711000  | -0.865355000 | -2.016914000 |
| O  | 3.425329000  | -2.069531000 | -2.309507000 |
| C  | 4.358453000  | -0.057829000 | -1.398504000 |
| C  | 5.546954000  | -0.715734000 | -1.038009000 |
| C  | 4.218236000  | 1.316555000  | -1.158660000 |
| C  | 6.553740000  | 0.023340000  | -0.437267000 |
| H  | 5.636392000  | -1.776986000 | -1.232935000 |
| C  | 5.253777000  | 2.033796000  | -0.550387000 |
| H  | 3.287074000  | 1.795138000  | -1.430008000 |
| C  | 6.441127000  | 1.388217000  | -0.178825000 |
| H  | 5.131069000  | 3.092911000  | -0.348351000 |
| H  | 7.250952000  | 1.927152000  | 0.298521000  |
| Cl | 8.131876000  | -0.836388000 | 0.056270000  |

 $^{84}4_{(hs, hs)}$  OR  $4^{-8}R_{(hs, hs)}$ 

|    |              |              |              |
|----|--------------|--------------|--------------|
| Fe | 0.363274000  | -0.090953000 | -1.051756000 |
| N  | -0.959943000 | 0.018263000  | 0.200809000  |
| N  | 0.953578000  | 1.766357000  | -0.557826000 |
| N  | -0.868609000 | 0.673625000  | -2.432758000 |
| N  | -0.239954000 | -1.941694000 | -1.513507000 |
| N  | 1.610371000  | -0.845937000 | 0.329484000  |
| C  | 0.637350000  | 2.937307000  | -1.220019000 |
| C  | 1.255732000  | 4.057898000  | -0.545346000 |
| H  | 1.160623000  | 5.086922000  | -0.862990000 |
| C  | 1.916001000  | 3.556144000  | 0.541945000  |
| H  | 2.488352000  | 4.086292000  | 1.290118000  |
| C  | 1.733002000  | 2.122607000  | 0.525206000  |
| C  | 2.347284000  | 1.242200000  | 1.399768000  |
| H  | 2.938314000  | 1.662788000  | 2.203777000  |
| C  | 2.317926000  | -0.135763000 | 1.281291000  |
| C  | 3.090438000  | -1.048431000 | 2.094139000  |
| H  | 3.741330000  | -0.741159000 | 2.900057000  |
| C  | 2.849698000  | -2.307591000 | 1.622448000  |
| H  | 3.252429000  | -3.247937000 | 1.971048000  |
| C  | 1.904905000  | -2.180823000 | 0.535141000  |
| C  | 1.317169000  | -3.243867000 | -0.128125000 |
| H  | 1.640263000  | -4.243019000 | 0.140036000  |
| C  | 0.299177000  | -3.126546000 | -1.058004000 |
| C  | -0.421847000 | -4.242151000 | -1.634328000 |
| H  | -0.192704000 | -5.279764000 | -1.437089000 |
| C  | -1.407025000 | -3.718033000 | -2.420485000 |
| H  | -2.150548000 | -4.235623000 | -3.010181000 |
| C  | -1.279350000 | -2.276459000 | -2.355086000 |
| C  | -2.042117000 | -1.384531000 | -3.090129000 |
| H  | -2.841284000 | -1.790768000 | -3.698328000 |
| C  | -1.826339000 | -0.017358000 | -3.145404000 |
| C  | -2.527107000 | 0.892555000  | -4.026847000 |
| H  | -3.329327000 | 0.599390000  | -4.689424000 |
| C  | -1.969323000 | 2.127512000  | -3.853008000 |
| H  | -2.227081000 | 3.060068000  | -4.335469000 |
| C  | -0.942310000 | 1.990061000  | -2.841386000 |
| C  | -0.217233000 | 3.042184000  | -2.306069000 |
| H  | -0.392178000 | 4.031801000  | -2.713710000 |
| Fe | -2.428951000 | 0.129645000  | 1.566097000  |
| N  | -2.676292000 | 2.051631000  | 0.797918000  |
| N  | -0.927790000 | 0.849694000  | 2.822308000  |
| N  | -1.843234000 | -1.819520000 | 2.019509000  |
| N  | -3.638483000 | -0.614046000 | 0.039617000  |
| C  | -2.055968000 | 3.190849000  | 1.257190000  |
| C  | -2.514957000 | 4.323878000  | 0.468937000  |
| H  | -2.182256000 | 5.343401000  | 0.608406000  |
| C  | -3.400301000 | 3.840129000  | -0.456952000 |
| H  | -3.934108000 | 4.386875000  | -1.222318000 |
| C  | -3.497646000 | 2.403861000  | -0.248514000 |
| C  | -4.284751000 | 1.526559000  | -0.995730000 |
| H  | -4.879441000 | 1.966705000  | -1.789939000 |
| C  | -4.356999000 | 0.139533000  | -0.859463000 |
| C  | -5.160417000 | -0.751570000 | -1.680584000 |
| H  | -5.821415000 | -0.427708000 | -2.473176000 |
| C  | -4.895005000 | -2.030550000 | -1.267786000 |

|    |              |              |              |
|----|--------------|--------------|--------------|
| H  | -5.297173000 | -2.956206000 | -1.657041000 |
| C  | -3.923699000 | -1.940306000 | -0.189784000 |
| C  | -3.330220000 | -3.021553000 | 0.462882000  |
| H  | -3.628216000 | -4.011146000 | 0.130978000  |
| C  | -2.355905000 | -2.967632000 | 1.460534000  |
| C  | -1.698153000 | -4.116356000 | 2.063313000  |
| H  | -1.900801000 | -5.146192000 | 1.802918000  |
| C  | -0.794222000 | -3.633928000 | 2.971413000  |
| H  | -0.114086000 | -4.192230000 | 3.600057000  |
| C  | -0.886112000 | -2.182502000 | 2.939265000  |
| C  | -0.118808000 | -1.303780000 | 3.705187000  |
| H  | 0.595756000  | -1.753752000 | 4.387036000  |
| C  | -0.141779000 | 0.090729000  | 3.657976000  |
| C  | 0.698746000  | 0.978765000  | 4.444654000  |
| H  | 1.418358000  | 0.650046000  | 5.182170000  |
| C  | 0.411332000  | 2.259411000  | 4.052658000  |
| H  | 0.850472000  | 3.182068000  | 4.407543000  |
| C  | -0.606970000 | 2.172951000  | 3.018424000  |
| C  | -1.124469000 | 3.248108000  | 2.294910000  |
| H  | -0.730092000 | 4.229946000  | 2.537309000  |
| O  | -3.644668000 | 0.225937000  | 2.699750000  |
| O  | 1.789174000  | -0.231627000 | -2.487587000 |
| C  | 2.927095000  | -0.865062000 | -2.300653000 |
| C  | 4.026629000  | -0.044833000 | -1.653270000 |
| C  | 5.125809000  | -0.707648000 | -1.080750000 |
| C  | 3.948123000  | 1.353237000  | -1.595322000 |
| C  | 6.095418000  | 0.051605000  | -0.445766000 |
| H  | 5.175368000  | -1.786890000 | -1.144771000 |
| C  | 4.953102000  | 2.092074000  | -0.962386000 |
| H  | 3.078001000  | 1.832158000  | -2.024512000 |
| C  | 6.043616000  | 1.441843000  | -0.367857000 |
| H  | 4.878250000  | 3.173813000  | -0.908555000 |
| H  | 6.823833000  | 1.995857000  | 0.140702000  |
| Cl | 7.541777000  | -0.817732000 | 0.356010000  |
| O  | 3.167012000  | -2.063965000 | -2.600654000 |

${}^2_4(\text{hs, hs})$  or  $4\text{-}^2\mathbf{R}(\text{hs, hs})$

|    |              |              |              |
|----|--------------|--------------|--------------|
| Fe | -2.477327000 | 0.224134000  | 1.390967000  |
| N  | -0.964018000 | 0.041122000  | 0.135753000  |
| N  | -1.341185000 | 1.718826000  | 2.283451000  |
| N  | -1.484559000 | -1.204045000 | 2.543447000  |
| N  | -3.299065000 | -1.303287000 | 0.247521000  |
| N  | -3.210082000 | 1.627718000  | 0.030348000  |
| C  | -0.469468000 | 1.545049000  | 3.335364000  |
| C  | 0.040088000  | 2.844801000  | 3.736690000  |
| H  | 0.751661000  | 3.004450000  | 4.535318000  |
| C  | -0.535910000 | 3.778037000  | 2.915525000  |
| H  | -0.387299000 | 4.849290000  | 2.912591000  |
| C  | -1.406244000 | 3.064573000  | 1.997282000  |
| C  | -2.167068000 | 3.644841000  | 0.981435000  |
| H  | -2.082619000 | 4.720989000  | 0.868959000  |
| C  | -2.989874000 | 2.984876000  | 0.068169000  |
| C  | -3.717715000 | 3.607799000  | -1.026223000 |
| H  | -3.718287000 | 4.668178000  | -1.239369000 |
| C  | -4.352556000 | 2.605877000  | -1.710782000 |
| H  | -4.973454000 | 2.686979000  | -2.592640000 |
| C  | -4.023717000 | 1.355444000  | -1.044185000 |
| C  | -4.440404000 | 0.085086000  | -1.444431000 |
| H  | -5.067719000 | 0.037758000  | -2.328688000 |
| C  | -4.110093000 | -1.134751000 | -0.853210000 |
| C  | -4.555882000 | -2.441570000 | -1.305174000 |
| H  | -5.198562000 | -2.608376000 | -2.158765000 |
| C  | -3.999540000 | -3.372751000 | -0.468883000 |
| H  | -4.097937000 | -4.448989000 | -0.506129000 |
| C  | -3.202230000 | -2.652049000 | 0.508614000  |
| C  | -2.447653000 | -3.230713000 | 1.529651000  |
| H  | -2.453102000 | -4.314612000 | 1.580142000  |
| C  | -1.651077000 | -2.566628000 | 2.462921000  |
| C  | -0.830817000 | -3.199808000 | 3.484102000  |
| H  | -0.761559000 | -4.267503000 | 3.641487000  |
| C  | -0.176505000 | -2.200864000 | 4.153219000  |
| H  | 0.532687000  | -2.291708000 | 4.964571000  |
| C  | -0.586358000 | -0.941281000 | 3.551466000  |
| C  | -0.123877000 | 0.323449000  | 3.915283000  |

|    |              |              |              |
|----|--------------|--------------|--------------|
| H  | 0.602544000  | 0.359975000  | 4.720639000  |
| Fe | 0.343664000  | -0.178257000 | -0.906193000 |
| N  | 1.677547000  | -0.119080000 | 0.689033000  |
| N  | 0.523542000  | 1.899823000  | -1.082918000 |
| N  | -0.911353000 | -0.218094000 | -2.548848000 |
| N  | 0.214262000  | -2.235871000 | -0.737182000 |
| C  | 2.222268000  | 1.007850000  | 1.260514000  |
| C  | 3.068250000  | 0.605114000  | 2.371012000  |
| H  | 3.633951000  | 1.287560000  | 2.990364000  |
| C  | 3.005134000  | -0.760012000 | 2.455111000  |
| H  | 3.505117000  | -1.410577000 | 3.159385000  |
| C  | 2.115032000  | -1.215639000 | 1.400863000  |
| C  | 1.749266000  | -2.540303000 | 1.162520000  |
| H  | 2.187550000  | -3.285669000 | 1.817889000  |
| C  | 0.881007000  | -3.012670000 | 0.178202000  |
| C  | 0.545916000  | -4.406256000 | -0.062401000 |
| H  | 0.934373000  | -5.238382000 | 0.508579000  |
| C  | -0.311738000 | -4.437170000 | -1.128813000 |
| H  | -0.763515000 | -5.300078000 | -1.598949000 |
| C  | -0.512650000 | -3.062334000 | -1.558782000 |
| C  | -1.301504000 | -2.649201000 | -2.633258000 |
| H  | -1.835264000 | -3.428510000 | -3.167814000 |
| C  | -1.489493000 | -1.342689000 | -3.087935000 |
| C  | -2.338718000 | -0.941698000 | -4.198756000 |
| H  | -2.916198000 | -1.623749000 | -4.808158000 |
| C  | -2.258687000 | 0.422124000  | -4.297641000 |
| H  | -2.756343000 | 1.071976000  | -5.004820000 |
| C  | -1.356255000 | 0.876723000  | -3.250727000 |
| C  | -1.005011000 | 2.204402000  | -2.997146000 |
| H  | -1.468981000 | 2.954996000  | -3.629381000 |
| C  | -0.151659000 | 2.677552000  | -1.998454000 |
| C  | 0.152829000  | 4.073767000  | -1.734305000 |
| H  | -0.239436000 | 4.906054000  | -2.303075000 |
| C  | 0.990489000  | 4.109552000  | -0.649456000 |
| H  | 1.415095000  | 4.976557000  | -0.161531000 |
| C  | 1.213079000  | 2.735900000  | -0.232978000 |
| C  | 2.001840000  | 2.320086000  | 0.840662000  |
| H  | 2.487124000  | 3.100177000  | 1.417737000  |
| O  | -3.762374000 | 0.365309000  | 2.434553000  |
| O  | 1.858634000  | -0.441079000 | -2.136468000 |
| C  | 2.998766000  | -1.063796000 | -1.888288000 |
| C  | 4.136587000  | -0.161120000 | -1.468413000 |
| C  | 4.003717000  | 1.233478000  | -1.507067000 |
| C  | 5.334159000  | -0.740594000 | -1.016580000 |
| C  | 5.060071000  | 2.052036000  | -1.094435000 |
| H  | 3.060850000  | 1.647013000  | -1.840310000 |
| C  | 6.358545000  | 0.098310000  | -0.607569000 |
| H  | 5.417293000  | -1.819837000 | -0.998253000 |
| C  | 6.257702000  | 1.487778000  | -0.633258000 |
| H  | 4.950828000  | 3.132138000  | -1.116616000 |
| H  | 7.083090000  | 2.106782000  | -0.301944000 |
| O  | 3.194760000  | -2.298769000 | -1.990889000 |
| Cl | 7.949253000  | -0.655459000 | 0.011537000  |

${}^6_4(\text{is, is})$  or  $4\text{-}^6\mathbf{R}(\text{is, is})$

|    |              |              |              |
|----|--------------|--------------|--------------|
| Fe | 0.473965000  | -0.123208000 | -1.058635000 |
| N  | -0.988772000 | 0.017102000  | 0.108594000  |
| N  | 1.591026000  | -1.021554000 | 0.380399000  |
| N  | 1.051747000  | 1.670107000  | -0.361248000 |
| N  | -0.670606000 | 0.787520000  | -2.451950000 |
| N  | -0.278982000 | -1.899730000 | -1.567316000 |
| C  | 2.366023000  | -0.402658000 | 1.342426000  |
| C  | 3.024363000  | -1.397564000 | 2.164835000  |
| H  | 3.697767000  | -1.166945000 | 2.978415000  |
| C  | 2.626313000  | -2.619516000 | 1.704209000  |
| H  | 2.900180000  | -3.600862000 | 2.065642000  |
| C  | 1.715857000  | -2.378813000 | 0.603173000  |
| C  | 1.018787000  | -3.365910000 | -0.070583000 |
| H  | 1.197880000  | -4.395360000 | 0.218618000  |
| C  | 0.079644000  | -3.135381000 | -1.062041000 |
| C  | -0.682278000 | -4.172066000 | -1.719242000 |
| H  | -0.586555000 | -5.226942000 | -1.503373000 |
| C  | -1.502334000 | -3.554788000 | -2.622759000 |
| H  | -2.216970000 | -3.999372000 | -3.301375000 |



|                                                     |              |              |              |    |              |              |              |
|-----------------------------------------------------|--------------|--------------|--------------|----|--------------|--------------|--------------|
| C                                                   | -1.240709000 | -2.135903000 | -2.532330000 | N  | -0.982445000 | 0.017996000  | 0.133671000  |
| C                                                   | -1.844308000 | -1.179606000 | -3.334344000 | N  | -3.603288000 | -0.310312000 | -0.400028000 |
| H                                                   | -2.595283000 | -1.521920000 | -4.037777000 | N  | -2.561789000 | 2.093882000  | 0.789844000  |
| C                                                   | -1.567855000 | 0.177326000  | -3.301400000 | N  | -1.233405000 | 0.538200000  | 2.766648000  |
| C                                                   | -2.212085000 | 1.172333000  | -4.138233000 | N  | -2.274748000 | -1.865702000 | 1.576810000  |
| H                                                   | -2.956754000 | 0.948213000  | -4.889608000 | C  | -4.147032000 | 0.606130000  | -1.276060000 |
| C                                                   | -1.704348000 | 2.386225000  | -3.773480000 | C  | -4.904860000 | -0.086727000 | -2.298720000 |
| H                                                   | -1.948883000 | 3.366133000  | -4.159925000 | H  | -5.425513000 | 0.405038000  | -3.108827000 |
| C                                                   | -0.755086000 | 2.140243000  | -2.703849000 | C  | -4.806388000 | -1.423232000 | -2.032850000 |
| C                                                   | -0.095504000 | 3.128931000  | -1.992324000 | H  | -5.229052000 | -2.254684000 | -2.579760000 |
| H                                                   | -0.271313000 | 4.159444000  | -2.281704000 | C  | -3.987850000 | -1.558650000 | -0.845201000 |
| C                                                   | 0.722744000  | 2.906453000  | -0.894461000 | C  | -3.637103000 | -2.766167000 | -0.262034000 |
| C                                                   | 1.356319000  | 3.952172000  | -0.126248000 | H  | -3.994854000 | -3.673679000 | -0.735709000 |
| H                                                   | 1.255354000  | 5.008112000  | -0.336098000 | C  | -2.839190000 | -2.902886000 | 0.862965000  |
| C                                                   | 2.058772000  | 3.343331000  | 0.879108000  | C  | -2.458746000 | -4.168938000 | 1.456319000  |
| H                                                   | 2.656649000  | 3.797425000  | 1.656925000  | H  | -2.765350000 | -5.135162000 | 1.080186000  |
| C                                                   | 1.870910000  | 1.921295000  | 0.726618000  | C  | -1.658349000 | -3.883013000 | 2.525789000  |
| C                                                   | 2.484602000  | 0.964046000  | 1.518482000  | H  | -1.172132000 | -4.566178000 | 3.208362000  |
| H                                                   | 3.110020000  | 1.314447000  | 2.331257000  | C  | -1.543150000 | -2.439901000 | 2.595308000  |
| Fe                                                  | -2.484088000 | 0.147550000  | 1.434426000  | C  | -0.793987000 | -1.757947000 | 3.541477000  |
| N                                                   | -2.703869000 | 2.044862000  | 0.767862000  | H  | -0.252954000 | -2.352675000 | 4.269235000  |
| N                                                   | -1.090007000 | 0.787100000  | 2.753507000  | C  | -0.653048000 | -0.381146000 | 3.615937000  |
| N                                                   | -2.036588000 | -1.768035000 | 1.902453000  | C  | 0.153178000  | 0.308129000  | 4.603479000  |
| N                                                   | -3.673366000 | -0.509536000 | -0.064388000 | H  | 0.719434000  | -0.186945000 | 5.380196000  |
| C                                                   | -2.126607000 | 3.179622000  | 1.300567000  | C  | 0.056018000  | 1.644333000  | 4.336897000  |
| C                                                   | -2.552032000 | 4.345132000  | 0.552459000  | H  | 0.525898000  | 2.472234000  | 4.849603000  |
| H                                                   | -2.234018000 | 5.356109000  | 0.766865000  | C  | -0.810474000 | 1.783557000  | 3.183936000  |
| C                                                   | -3.377651000 | 3.900971000  | -0.441297000 | C  | -1.143814000 | 2.989856000  | 2.588244000  |
| H                                                   | -3.879991000 | 4.471928000  | -1.209906000 | H  | -0.716466000 | 3.892154000  | 3.011576000  |
| C                                                   | -3.470318000 | 2.461852000  | -0.301931000 | C  | -1.956738000 | 3.127919000  | 1.473982000  |
| C                                                   | -4.221195000 | 1.641207000  | -1.128081000 | C  | -2.284542000 | 4.390153000  | 0.842267000  |
| H                                                   | -4.762419000 | 2.111585000  | -1.941772000 | H  | -1.928868000 | 5.352847000  | 1.182715000  |
| C                                                   | -4.317884000 | 0.264155000  | -1.008317000 | C  | -3.084956000 | 4.104184000  | -0.227299000 |
| C                                                   | -5.106926000 | -0.581323000 | -1.880826000 | H  | -3.520962000 | 4.783727000  | -0.946479000 |
| H                                                   | -5.702818000 | -0.217289000 | -2.706445000 | C  | -3.253179000 | 2.664849000  | -0.258339000 |
| C                                                   | -4.928104000 | -1.868005000 | -1.457304000 | C  | -3.989294000 | 1.981972000  | -1.213908000 |
| H                                                   | -5.344668000 | -2.778707000 | -1.865160000 | H  | -4.460562000 | 2.571846000  | -1.992538000 |
| C                                                   | -4.021237000 | -1.818657000 | -0.328617000 | Fe | 0.351494000  | -0.076881000 | -0.820740000 |
| C                                                   | -3.538759000 | -2.933017000 | 0.339150000  | N  | -0.516840000 | 1.067383000  | -2.239911000 |
| H                                                   | -3.881709000 | -3.905327000 | 0.002289000  | N  | -0.355544000 | -1.731981000 | -1.716356000 |
| C                                                   | -2.601297000 | -2.904454000 | 1.358837000  | N  | 1.311597000  | -1.221700000 | 0.540127000  |
| C                                                   | -2.032332000 | -4.082337000 | 1.981988000  | N  | 1.138793000  | 1.579680000  | 0.029235000  |
| H                                                   | -2.302395000 | -5.097507000 | 1.726159000  | C  | -1.313840000 | 0.629295000  | -3.275944000 |
| C                                                   | -1.111613000 | -3.646179000 | 2.891596000  | C  | -1.790685000 | 1.762286000  | -4.043404000 |
| H                                                   | -0.471434000 | -4.228829000 | 3.539244000  | H  | -2.434975000 | 1.684726000  | -4.908354000 |
| C                                                   | -1.118747000 | -2.198076000 | 2.839326000  | C  | -1.273511000 | 2.883579000  | -3.460093000 |
| C                                                   | -0.319056000 | -1.382091000 | 3.623198000  | H  | -1.406030000 | 3.918102000  | -3.745453000 |
| H                                                   | 0.369980000  | -1.865276000 | 4.306996000  | C  | -0.478907000 | 2.443278000  | -2.330868000 |
| C                                                   | -0.317313000 | 0.002892000  | 3.585812000  | C  | 0.208872000  | 3.290976000  | -1.478495000 |
| C                                                   | 0.517512000  | 0.844498000  | 4.418693000  | H  | 0.140698000  | 4.356382000  | -1.669190000 |
| H                                                   | 1.220016000  | 0.471151000  | 5.150858000  | C  | 0.960395000  | 2.884732000  | -0.387415000 |
| C                                                   | 0.243520000  | 2.138714000  | 4.078530000  | C  | 1.682038000  | 3.778962000  | 0.491426000  |
| H                                                   | 0.676800000  | 3.047937000  | 4.471879000  | H  | 1.704309000  | 4.854392000  | 0.380693000  |
| C                                                   | -0.753238000 | 2.097378000  | 3.027974000  | C  | 2.287342000  | 3.004194000  | 1.441907000  |
| C                                                   | -1.239940000 | 3.212171000  | 2.364998000  | H  | 2.913364000  | 3.311781000  | 2.267848000  |
| H                                                   | -0.857924000 | 4.180853000  | 2.668481000  | C  | 1.943020000  | 1.630876000  | 1.151128000  |
| O                                                   | -3.741729000 | 0.255819000  | 2.533253000  | C  | 2.384786000  | 0.539820000  | 1.880840000  |
| O                                                   | 1.917999000  | -0.265262000 | -2.339290000 | H  | 3.007540000  | 0.736485000  | 2.746023000  |
| C                                                   | 3.058899000  | -0.906188000 | -2.125370000 | C  | 2.091515000  | -0.781548000 | -1.591272000 |
| C                                                   | 4.159188000  | -0.056979000 | -1.534341000 | C  | 2.571562000  | -1.915108000 | 2.354693000  |
| C                                                   | 5.295324000  | -0.693231000 | -1.005827000 | H  | 3.210103000  | -1.837446000 | 3.223559000  |
| C                                                   | 4.048243000  | 1.339262000  | -1.478571000 | C  | 2.070311000  | -3.036379000 | 1.758941000  |
| C                                                   | 6.276239000  | 0.090948000  | -0.420499000 | H  | 2.211562000  | -4.071376000 | 2.036925000  |
| H                                                   | 5.363669000  | -1.772110000 | -1.061243000 | C  | 1.282052000  | -2.597486000 | 0.626460000  |
| C                                                   | 5.061912000  | 2.102699000  | -0.890160000 | C  | 0.602772000  | -3.443703000 | -0.231441000 |
| H                                                   | 3.150849000  | 1.798695000  | -1.871504000 | H  | 0.665037000  | -4.508358000 | -0.037778000 |
| C                                                   | 6.193373000  | 1.480154000  | -0.345426000 | C  | -0.149006000 | -3.035787000 | -1.318770000 |
| H                                                   | 4.962669000  | 3.182022000  | -0.832907000 | C  | -0.845961000 | -3.935166000 | -2.213985000 |
| H                                                   | 6.982525000  | 2.054719000  | 0.125047000  | H  | -0.837493000 | -5.012126000 | -2.120625000 |
| O                                                   | 3.270613000  | -2.116215000 | -2.374157000 | C  | -1.473153000 | -3.162195000 | -3.148595000 |
| Cl                                                  | 7.778477000  | -0.738947000 | 0.310649000  | H  | -2.089238000 | -3.471953000 | -3.981316000 |
|                                                     |              |              |              | C  | -1.163407000 | -1.782783000 | -2.833192000 |
|                                                     |              |              |              | C  | -1.618527000 | -0.692708000 | -3.555677000 |
|                                                     |              |              |              | H  | -2.269100000 | -0.889504000 | -4.400576000 |
|                                                     |              |              |              | O  | -3.857009000 | 0.217497000  | 2.233853000  |
| <sup>24</sup> (is, is) Or 4- <sup>2</sup> R(is, is) |              |              |              |    |              |              |              |
| Fe                                                  | -2.469505000 | 0.117256000  | 1.221392000  |    |              |              |              |

|    |             |              |              |
|----|-------------|--------------|--------------|
| O  | 1.959516000 | -0.163543000 | -1.988078000 |
| C  | 3.057199000 | -0.865573000 | -1.804249000 |
| C  | 4.252447000 | -0.055063000 | -1.341195000 |
| C  | 5.448480000 | -0.724472000 | -1.030236000 |
| C  | 4.170034000 | 1.336626000  | -1.185990000 |
| C  | 6.520440000 | 0.021043000  | -0.565330000 |
| H  | 5.490127000 | -1.799137000 | -1.155481000 |
| C  | 5.270845000 | 2.059465000  | -0.713936000 |
| H  | 3.232346000 | 1.822489000  | -1.420192000 |
| C  | 6.467960000 | 1.402956000  | -0.394406000 |
| H  | 5.196527000 | 3.134368000  | -0.580471000 |
| H  | 7.328912000 | 1.946218000  | -0.023018000 |
| Cl | 8.113513000 | -0.855032000 | -0.138305000 |
| O  | 3.186307000 | -2.104633000 | -1.974650000 |

**4<sup>-10</sup>ts1<sub>(hs, hs)</sub>**

|    |              |              |              |
|----|--------------|--------------|--------------|
| Fe | -2.516685000 | 0.243577000  | 1.004625000  |
| N  | -1.047249000 | 0.014513000  | 0.061450000  |
| N  | -1.312847000 | 0.723980000  | 2.635861000  |
| N  | -2.370495000 | -1.777231000 | 1.499405000  |
| N  | -3.667235000 | -0.241503000 | -0.657254000 |
| N  | -2.505806000 | 2.245264000  | 0.420669000  |
| C  | -0.739441000 | -0.176425000 | 3.504364000  |
| C  | 0.072622000  | 0.554513000  | 4.464726000  |
| H  | 0.638529000  | 0.097128000  | 5.265100000  |
| C  | -0.011496000 | 1.882313000  | 4.138761000  |
| H  | 0.475275000  | 2.720468000  | 4.619126000  |
| C  | -0.872705000 | 1.984308000  | 2.969554000  |
| C  | -1.156667000 | 3.158278000  | 2.267567000  |
| H  | -0.716704000 | 4.071018000  | 2.657893000  |
| C  | -1.898415000 | 3.280384000  | 1.089168000  |
| C  | -2.146459000 | 4.515033000  | 0.359714000  |
| H  | -1.783097000 | 5.489786000  | 0.656730000  |
| C  | -2.901486000 | 4.191231000  | -0.737255000 |
| H  | -3.274551000 | 4.850494000  | -1.509581000 |
| C  | -3.128792000 | 2.754274000  | -0.694254000 |
| C  | -3.862153000 | 2.015047000  | -1.626084000 |
| H  | -4.271620000 | 2.570112000  | -2.464638000 |
| C  | -4.109047000 | 0.640164000  | -1.613047000 |
| C  | -4.848166000 | -0.101987000 | -2.626444000 |
| H  | -5.310043000 | 0.340337000  | -3.499051000 |
| C  | -4.820136000 | -1.421082000 | -2.260546000 |
| H  | -5.254413000 | -2.267381000 | -2.775873000 |
| C  | -4.062371000 | -1.506078000 | -1.018386000 |
| C  | -3.745557000 | -2.683256000 | -0.335794000 |
| H  | -4.118134000 | -3.606457000 | -0.769332000 |
| C  | -2.960780000 | -2.812394000 | 0.813412000  |
| C  | -2.605251000 | -4.063003000 | 1.467069000  |
| H  | -2.928209000 | -5.042085000 | 1.139465000  |
| C  | -1.798910000 | -3.750455000 | 2.530486000  |
| H  | -1.336281000 | -4.424512000 | 3.238780000  |
| C  | -1.650372000 | -2.303035000 | 2.545745000  |
| C  | -0.901740000 | -1.563296000 | 3.465718000  |
| H  | -0.365985000 | -2.131965000 | 4.219288000  |
| Fe | 0.640749000  | -0.221599000 | -1.042443000 |
| N  | 1.416590000  | -1.315794000 | 0.557726000  |
| N  | 1.328283000  | 1.537919000  | -0.143152000 |
| N  | -0.273779000 | 0.901472000  | -2.514564000 |
| N  | -0.252983000 | -1.941801000 | -1.781477000 |
| C  | 2.138592000  | -0.810251000 | 1.616274000  |
| C  | 2.538979000  | -1.911198000 | 2.473960000  |
| H  | 3.121870000  | -1.805405000 | 3.378560000  |
| C  | 2.040147000  | -3.060506000 | 1.917576000  |
| H  | 2.136680000  | -4.074403000 | 2.280480000  |
| C  | 1.326175000  | -2.680337000 | 0.712450000  |
| C  | 0.625952000  | -3.547995000 | -0.129507000 |
| H  | 0.633309000  | -4.597046000 | 0.147063000  |
| C  | -0.110279000 | -3.211135000 | -1.264856000 |
| C  | -0.878609000 | -4.133372000 | -2.083318000 |
| H  | -0.948888000 | -5.197952000 | -1.907481000 |
| C  | -1.478103000 | -3.397449000 | -3.071374000 |
| H  | -2.132633000 | -3.744298000 | -3.859209000 |
| C  | -1.080815000 | -2.012664000 | -2.876972000 |
| C  | -1.473443000 | -0.928010000 | -3.664936000 |

|    |              |              |              |
|----|--------------|--------------|--------------|
| H  | -2.157487000 | -1.143759000 | -4.479071000 |
| C  | -1.110988000 | 0.409751000  | -3.496245000 |
| C  | -1.576171000 | 1.519413000  | -4.307211000 |
| H  | -2.248703000 | 1.424777000  | -5.148777000 |
| C  | -1.024774000 | 2.663198000  | -3.789902000 |
| H  | -1.162816000 | 3.681708000  | -4.126150000 |
| C  | -0.216952000 | 2.274836000  | -2.648981000 |
| C  | 0.461758000  | 3.148062000  | -1.797174000 |
| H  | 0.394963000  | 4.204796000  | -2.034967000 |
| C  | 1.165584000  | 2.813596000  | -0.636428000 |
| C  | 1.826791000  | 3.746354000  | 0.258367000  |
| H  | 1.853573000  | 4.818612000  | 0.119340000  |
| C  | 2.366938000  | 3.011749000  | 1.283323000  |
| H  | 2.924870000  | 3.367673000  | 2.138459000  |
| C  | 2.047664000  | 1.619534000  | 1.030639000  |
| C  | 2.423561000  | 0.539910000  | 1.831395000  |
| H  | 2.988301000  | 0.777426000  | 2.726772000  |
| O  | -4.103186000 | 0.455216000  | 1.947479000  |
| O  | 2.336247000  | -0.501814000 | -2.020158000 |
| C  | 3.469362000  | -1.109769000 | -1.701990000 |
| C  | 4.554594000  | -0.195779000 | -1.183447000 |
| C  | 4.384162000  | 1.195739000  | -1.152231000 |
| C  | 5.744985000  | -0.768031000 | -0.702788000 |
| C  | 5.390035000  | 2.016097000  | -0.630561000 |
| H  | 3.453803000  | 1.609853000  | -1.516139000 |
| C  | 6.722708000  | 0.072456000  | -0.194400000 |
| H  | 5.858619000  | -1.844196000 | -0.737374000 |
| C  | 6.578846000  | 1.457619000  | -0.140911000 |
| H  | 5.243323000  | 3.090501000  | -0.588978000 |
| H  | 7.366144000  | 2.077891000  | 0.270912000  |
| O  | 3.677200000  | -2.341947000 | -1.792436000 |
| Cl | 8.302739000  | -0.672483000 | 0.455384000  |
| H  | -3.998920000 | 0.448674000  | 3.067845000  |
| H  | -4.826067000 | 0.498536000  | 4.851561000  |
| C  | -3.810042000 | 0.370345000  | 4.473134000  |
| H  | -3.385558000 | -0.625555000 | 4.594902000  |
| H  | -3.120788000 | 1.186449000  | 4.686212000  |

**4<sup>-2</sup>ts1<sub>(hs, hs)</sub>**

|    |              |              |              |
|----|--------------|--------------|--------------|
| Fe | 2.455937000  | -0.226154000 | 0.868877000  |
| N  | 0.949380000  | 0.027216000  | 0.017304000  |
| N  | 1.385107000  | -1.089956000 | 2.416778000  |
| N  | 2.261566000  | 1.648207000  | 1.767981000  |
| N  | 3.520178000  | 0.632521000  | -0.683091000 |
| N  | 2.619348000  | -2.104049000 | -0.035887000 |
| C  | 0.877175000  | -0.418540000 | 3.507733000  |
| C  | 0.148572000  | -1.365879000 | 4.335150000  |
| H  | -0.358847000 | -1.111780000 | 5.255811000  |
| C  | 0.209136000  | -2.583240000 | 3.709859000  |
| H  | -0.235073000 | -3.518350000 | 4.022426000  |
| C  | 0.983387000  | -2.405709000 | 2.493508000  |
| C  | 1.285168000  | -3.406693000 | 1.568210000  |
| H  | 0.871938000  | -4.389713000 | 1.769043000  |
| C  | 2.043998000  | -3.272196000 | 0.403329000  |
| C  | 2.355463000  | -4.330629000 | -0.545402000 |
| H  | 2.026376000  | -5.356845000 | -0.452879000 |
| C  | 3.106708000  | -3.769158000 | -1.544024000 |
| H  | 3.508720000  | -4.247547000 | -2.426863000 |
| C  | 3.262685000  | -2.357962000 | -1.224190000 |
| C  | 3.921157000  | -1.409451000 | -2.009068000 |
| H  | 4.364968000  | -1.772529000 | -2.930943000 |
| C  | 4.037607000  | -0.038910000 | -1.764860000 |
| C  | 4.707458000  | 0.921133000  | -2.629664000 |
| H  | 5.203043000  | 0.670544000  | -3.557912000 |
| C  | 4.572992000  | 2.153313000  | -2.047625000 |
| H  | 4.936123000  | 3.106455000  | -2.407462000 |
| C  | 3.820540000  | 1.967427000  | -0.816108000 |
| C  | 3.463019000  | 2.976728000  | 0.080761000  |
| H  | 3.764578000  | 3.985343000  | -0.183672000 |
| C  | 2.752806000  | 2.831621000  | 1.273639000  |
| C  | 2.413426000  | 3.900493000  | 2.202387000  |
| H  | 2.669184000  | 4.942104000  | 2.062249000  |
| C  | 1.724894000  | 3.330383000  | 3.239845000  |
| H  | 1.307418000  | 3.815276000  | 4.111893000  |

|    |              |              |              |    |              |              |              |
|----|--------------|--------------|--------------|----|--------------|--------------|--------------|
| C  | 1.631734000  | 1.904301000  | 2.959616000  | C  | 1.213823000  | -3.407288000 | 1.497572000  |
| C  | 1.000481000  | 0.949471000  | 3.760009000  | H  | 0.790297000  | -4.388682000 | 1.677964000  |
| H  | 0.519850000  | 1.316170000  | 4.661528000  | C  | 1.978862000  | -3.237447000 | 0.354275000  |
| Fe | -0.509913000 | 0.271627000  | -0.772471000 | C  | 2.299510000  | -4.288554000 | -0.589583000 |
| N  | -1.392675000 | 1.058988000  | 0.921290000  | H  | 1.954802000  | -5.309878000 | -0.504788000 |
| N  | -1.227760000 | -1.625052000 | -0.232904000 | C  | 3.082836000  | -3.728071000 | -1.558852000 |
| N  | 0.269183000  | -0.520916000 | -2.512015000 | H  | 3.510274000  | -4.194349000 | -2.435760000 |
| N  | 0.117704000  | 2.168654000  | -1.341944000 | C  | 3.237294000  | -2.327172000 | -1.221926000 |
| C  | -2.084136000 | 0.358312000  | 1.885702000  | C  | 3.917776000  | -1.403733000 | -1.999757000 |
| C  | -2.497605000 | 1.284714000  | 2.926323000  | H  | 4.381678000  | -1.767363000 | -2.910380000 |
| H  | -3.064315000 | 1.006486000  | 3.804336000  | C  | 4.009513000  | -0.045795000 | -1.738132000 |
| C  | -2.040889000 | 2.524644000  | 2.569632000  | C  | 4.679836000  | 0.910953000  | -2.597208000 |
| H  | -2.161257000 | 3.460012000  | 3.098536000  | H  | 5.188568000  | 0.653497000  | -3.516023000 |
| C  | -1.343940000 | 2.380931000  | 1.303102000  | C  | 4.521099000  | 2.140454000  | -2.024155000 |
| C  | -0.737415000 | 3.417237000  | 0.593971000  | H  | 4.874221000  | 3.100816000  | -2.373624000 |
| H  | -0.789316000 | 4.402860000  | 1.044485000  | C  | 3.760538000  | 1.943340000  | -0.805860000 |
| C  | -0.069601000 | 3.324234000  | -0.625754000 | C  | 3.410595000  | 2.952954000  | 0.076820000  |
| C  | 0.554397000  | 4.423529000  | -1.345941000 | H  | 3.696924000  | 3.966246000  | -0.181794000 |
| H  | 0.555746000  | 5.452943000  | -1.014525000 | C  | 2.731579000  | 2.763724000  | 1.269562000  |
| C  | 1.112933000  | 3.898453000  | -2.480315000 | C  | 2.423243000  | 3.815496000  | 2.218790000  |
| H  | 1.662334000  | 4.414220000  | -3.256122000 | H  | 2.672108000  | 4.857953000  | 2.075798000  |
| C  | 0.837255000  | 2.469142000  | -2.472234000 | C  | 1.783590000  | 3.226198000  | 3.271605000  |
| C  | 1.238347000  | 1.549632000  | -3.442353000 | H  | 1.394685000  | 3.685183000  | 4.170025000  |
| H  | 1.828038000  | 1.940409000  | -4.265478000 | C  | 1.687857000  | 1.810934000  | 2.969218000  |
| C  | 0.980293000  | 0.177256000  | -3.460141000 | C  | 1.080209000  | 0.872282000  | 3.788167000  |
| C  | 1.417284000  | -0.751968000 | -4.490420000 | H  | 0.643481000  | 1.228386000  | 4.714905000  |
| H  | 1.997485000  | -0.474575000 | -5.360072000 | Fe | -0.491947000 | 0.299868000  | -0.756176000 |
| C  | 0.960814000  | -1.993453000 | -4.137190000 | N  | -1.339032000 | 1.027691000  | 0.925034000  |
| H  | 1.097315000  | -2.930690000 | -4.659422000 | N  | -1.198467000 | -1.541904000 | -0.303780000 |
| C  | 0.239527000  | -1.846005000 | -2.882709000 | N  | 0.272318000  | -0.421679000 | -2.478928000 |
| C  | -0.379273000 | -2.878623000 | -2.177020000 | N  | 0.103748000  | 2.153785000  | -1.260653000 |
| H  | -0.309603000 | -3.869961000 | -2.613762000 | C  | -2.024787000 | 0.310986000  | 1.886036000  |
| C  | -1.063135000 | -2.779516000 | -0.963320000 | C  | -2.434563000 | 1.195057000  | 2.957755000  |
| C  | -1.728892000 | -3.868465000 | -0.268490000 | H  | -2.992604000 | 0.878493000  | 3.827864000  |
| H  | -1.760437000 | -4.892515000 | -0.616027000 | C  | -1.992213000 | 2.445076000  | 2.633135000  |
| C  | -2.282142000 | -3.343367000 | 0.871610000  | H  | -2.111699000 | 3.368929000  | 3.181442000  |
| H  | -2.855426000 | -3.854420000 | 1.633190000  | C  | -1.310932000 | 2.335998000  | 1.360409000  |
| C  | -1.962040000 | -1.927499000 | 0.889873000  | C  | -0.736867000 | 3.398554000  | 0.685601000  |
| C  | -2.350483000 | -1.010539000 | 1.867118000  | H  | -0.797021000 | 4.376634000  | 1.148903000  |
| H  | -2.916725000 | -1.403864000 | 2.704994000  | C  | -0.094177000 | 3.308934000  | -0.535919000 |
| O  | 4.054705000  | -0.446526000 | 1.727176000  | C  | 0.493655000  | 4.432264000  | -1.236085000 |
| O  | -2.191301000 | 0.531922000  | -1.737487000 | H  | 0.467088000  | 5.452340000  | -0.879066000 |
| C  | -3.282954000 | 1.168536000  | -1.348812000 | C  | 1.053466000  | 3.940692000  | -2.380028000 |
| C  | -4.462009000 | 0.260846000  | -1.071115000 | H  | 1.584643000  | 4.472391000  | -3.157301000 |
| C  | -4.351025000 | -1.132103000 | -1.195127000 | C  | 0.809285000  | 2.512297000  | -2.389613000 |
| C  | -5.672316000 | 0.833130000  | -0.643218000 | C  | 1.236198000  | 1.650596000  | -3.386147000 |
| C  | -5.439198000 | -1.954372000 | -0.884132000 | H  | 1.816224000  | 2.074031000  | -4.198595000 |
| H  | -3.403514000 | -1.544585000 | -1.513796000 | C  | 0.986171000  | 0.288324000  | -3.420762000 |
| C  | -6.732318000 | -0.009612000 | -0.347833000 | C  | 1.426364000  | -0.601073000 | -4.476886000 |
| H  | -5.735218000 | 1.909891000  | -0.548685000 | H  | 2.007659000  | -0.288586000 | -5.333380000 |
| C  | -6.651514000 | -1.396688000 | -0.453706000 | C  | 0.967866000  | -1.848779000 | -4.163528000 |
| H  | -5.342661000 | -3.032672000 | -0.964209000 | H  | 1.096498000  | -2.774190000 | -4.707781000 |
| H  | -7.503251000 | -2.019155000 | -0.206064000 | C  | 0.247614000  | -1.731608000 | -2.911385000 |
| O  | -3.406858000 | 2.408279000  | -1.208195000 | C  | -0.375758000 | -2.784954000 | -2.263754000 |
| Cl | -8.344705000 | 0.734476000  | 0.225084000  | H  | -0.316312000 | -3.763488000 | -2.727624000 |
| H  | 5.150166000  | -2.405592000 | 3.664018000  | C  | -1.056432000 | -2.688647000 | -1.060320000 |
| C  | 4.107172000  | -2.405902000 | 3.342472000  | C  | -1.726980000 | -3.791315000 | -0.406312000 |
| H  | 4.067234000  | -1.309270000 | 2.456576000  | H  | -1.764733000 | -4.799209000 | -0.796545000 |
| H  | 3.377318000  | -2.137848000 | 4.105564000  | C  | -2.266730000 | -3.301112000 | 0.750876000  |
| H  | 3.811370000  | -3.231812000 | 2.697242000  | H  | -2.842857000 | -3.822115000 | 1.502911000  |

#### 4-<sup>2</sup>ts1(is, is)

|    |              |              |              |   |              |              |              |
|----|--------------|--------------|--------------|---|--------------|--------------|--------------|
| Fe | 2.418377000  | -0.247033000 | 0.847226000  | H | -2.842857000 | -3.822115000 | 1.502911000  |
| N  | 0.937650000  | 0.030114000  | 0.021027000  | C | -1.930525000 | -1.896546000 | 0.811920000  |
| N  | 1.391045000  | -1.108500000 | 2.356063000  | C | -2.305655000 | -1.043442000 | 1.836602000  |
| N  | 2.270813000  | 1.556358000  | 1.747280000  | H | -2.864622000 | -1.468924000 | 2.662279000  |
| N  | 3.460737000  | 0.606712000  | -0.655492000 | O | 4.035244000  | -0.483679000 | 1.702773000  |
| N  | 2.568165000  | -2.055969000 | -0.046416000 | O | -2.194188000 | 0.606835000  | -1.727376000 |
| C  | 0.934223000  | -0.474532000 | 3.494093000  | C | -3.282377000 | 1.211384000  | -1.302878000 |
| C  | 0.219868000  | -1.421356000 | 4.325492000  | C | -4.456904000 | 0.282895000  | -1.057439000 |
| H  | -0.239077000 | -1.174448000 | 5.272821000  | C | -4.340101000 | -1.101007000 | -1.255374000 |
| C  | 0.226425000  | -2.618044000 | 3.665298000  | C | -5.664899000 | 0.823094000  | -0.583898000 |
| H  | -0.220141000 | -3.556705000 | 3.962496000  | C | -5.418636000 | -1.946366000 | -0.973965000 |
| C  | 0.958079000  | -2.417391000 | 2.432650000  | H | -3.393920000 | -1.487968000 | -1.608743000 |
|    |              |              |              | C | -6.715353000 | -0.041524000 | -0.318982000 |
|    |              |              |              | H | -5.731696000 | 1.893213000  | -0.432916000 |
|    |              |              |              | C | -6.628619000 | -1.420563000 | -0.498525000 |
|    |              |              |              | H | -5.317288000 | -3.018472000 | -1.112469000 |

|    |              |              |              |
|----|--------------|--------------|--------------|
| H  | -7.473342000 | -2.060718000 | -0.272821000 |
| O  | -3.421180000 | 2.443034000  | -1.091515000 |
| Cl | -8.326001000 | 0.660332000  | 0.314775000  |
| H  | 5.150329000  | -2.563076000 | 3.509861000  |
| C  | 4.114170000  | -2.559775000 | 3.166504000  |
| H  | 4.073890000  | -1.395563000 | 2.357156000  |
| H  | 3.365723000  | -2.359756000 | 3.932458000  |
| H  | 3.848980000  | -3.348140000 | 2.463649000  |

**4-<sup>12</sup>int1**(hs, hs)

|    |              |              |              |
|----|--------------|--------------|--------------|
| Fe | -2.731862000 | 0.120253000  | 1.389513000  |
| N  | -0.954144000 | 0.009193000  | 0.132003000  |
| N  | -1.226306000 | 0.381089000  | 2.848297000  |
| N  | -2.414481000 | -1.950955000 | 1.505317000  |
| N  | -3.794245000 | -0.167247000 | -0.366641000 |
| N  | -2.560218000 | 2.158898000  | 0.921673000  |
| C  | -0.601815000 | -0.622119000 | 3.557284000  |
| C  | 0.334593000  | -0.021782000 | 4.491565000  |
| H  | 0.967707000  | -0.577796000 | 5.169329000  |
| C  | 0.278000000  | 1.335030000  | 4.306140000  |
| H  | 0.856332000  | 2.101798000  | 4.803152000  |
| C  | -0.692508000 | 1.584573000  | 3.254406000  |
| C  | -0.989231000 | 2.832592000  | 2.701043000  |
| H  | -0.460718000 | 3.682974000  | 3.119759000  |
| C  | -1.832991000 | 3.096690000  | 1.621035000  |
| C  | -2.056701000 | 4.403328000  | 1.024131000  |
| H  | -1.600842000 | 5.321765000  | 1.368005000  |
| C  | -2.905350000 | 4.223830000  | -0.035848000 |
| H  | -3.278963000 | 4.966989000  | -0.726936000 |
| C  | -3.212725000 | 2.804757000  | -0.103575000 |
| C  | -4.009850000 | 2.189874000  | -1.070666000 |
| H  | -4.436787000 | 2.837201000  | -1.829881000 |
| C  | -4.266197000 | 0.824092000  | -1.202093000 |
| C  | -5.034578000 | 0.210123000  | -2.269021000 |
| H  | -5.518145000 | 0.754136000  | -3.068956000 |
| C  | -4.995777000 | -1.145603000 | -2.069443000 |
| H  | -5.440599000 | -1.923092000 | -2.675488000 |
| C  | -4.201377000 | -1.382317000 | -0.878462000 |
| C  | -3.859954000 | -2.635797000 | -0.368593000 |
| H  | -4.243055000 | -3.497078000 | -0.906300000 |
| C  | -3.021966000 | -2.900580000 | 0.716095000  |
| C  | -2.612197000 | -4.219832000 | 1.168098000  |
| H  | -2.933135000 | -5.150244000 | 0.720077000  |
| C  | -1.746989000 | -4.037683000 | 2.214117000  |
| H  | -1.223900000 | -4.790191000 | 2.788213000  |
| C  | -1.617793000 | -2.604288000 | 2.419775000  |
| C  | -0.796743000 | -1.992532000 | 3.368624000  |
| H  | -0.204641000 | -2.654043000 | 3.992813000  |
| Fe | 0.554650000  | -0.087315000 | -0.992395000 |
| N  | 1.466105000  | -1.324381000 | 0.395756000  |
| N  | 1.281241000  | 1.578034000  | 0.052259000  |
| N  | -0.450137000 | 1.180898000  | -2.283652000 |
| N  | -0.420644000 | -1.721147000 | -1.819580000 |
| C  | 2.255861000  | -0.929478000 | 1.453607000  |
| C  | 2.695694000  | -2.111665000 | 2.179017000  |
| H  | 3.337827000  | -2.094390000 | 3.049117000  |
| C  | 2.142118000  | -3.196345000 | 1.555046000  |
| H  | 2.242694000  | -4.241415000 | 1.814696000  |
| C  | 1.356427000  | -2.696113000 | 0.437273000  |
| C  | 0.582285000  | -3.479312000 | -0.419153000 |
| H  | 0.605205000  | -4.550384000 | -0.245812000 |
| C  | -0.239657000 | -3.035117000 | -1.456021000 |
| C  | -1.047709000 | -3.873410000 | -2.324402000 |
| H  | -1.096582000 | -4.952322000 | -2.266960000 |
| C  | -1.703484000 | -3.041431000 | -3.195288000 |
| H  | -2.391439000 | -3.310366000 | -3.985489000 |
| C  | -1.302234000 | -1.682132000 | -2.874541000 |
| C  | -1.726190000 | -0.524115000 | -3.530980000 |
| H  | -2.450603000 | -0.658319000 | -4.328196000 |
| C  | -1.342604000 | 0.790099000  | -3.255572000 |
| C  | -1.852135000 | 1.976545000  | -3.929686000 |
| H  | -2.569245000 | 1.962191000  | -4.739431000 |
| C  | -1.269110000 | 3.061513000  | -3.333812000 |
| H  | -1.418121000 | 4.109272000  | -3.557798000 |

|    |              |              |              |
|----|--------------|--------------|--------------|
| C  | -0.396649000 | 2.556188000  | -2.282687000 |
| C  | 0.329369000  | 3.341286000  | -1.385828000 |
| H  | 0.259513000  | 4.416610000  | -1.518202000 |
| C  | 1.098106000  | 2.895833000  | -0.306487000 |
| C  | 1.840504000  | 3.737007000  | 0.613908000  |
| H  | 1.875998000  | 4.817468000  | 0.569655000  |
| C  | 2.459722000  | 2.905244000  | 1.514345000  |
| H  | 3.102512000  | 3.176259000  | 2.341011000  |
| C  | 2.106705000  | 1.545986000  | 1.155358000  |
| C  | 2.555156000  | 0.388914000  | 1.795674000  |
| H  | 3.195812000  | 0.531098000  | 2.660003000  |
| O  | -4.131694000 | 0.244844000  | 2.625364000  |
| O  | 2.085725000  | -0.194359000 | -2.191145000 |
| C  | 3.209412000  | -0.867860000 | -1.996623000 |
| C  | 4.338966000  | -0.052986000 | -1.408123000 |
| C  | 4.218097000  | 1.331752000  | -1.224298000 |
| C  | 5.516600000  | -0.712725000 | -1.016426000 |
| C  | 5.261355000  | 2.058063000  | -0.640422000 |
| H  | 3.293545000  | 1.810127000  | -1.517956000 |
| C  | 6.530279000  | 0.035590000  | -0.439732000 |
| H  | 5.590795000  | -1.781998000 | -1.169190000 |
| C  | 6.437339000  | 1.411131000  | -0.236205000 |
| H  | 5.152802000  | 3.125912000  | -0.480401000 |
| H  | 7.252541000  | 1.956730000  | 0.224236000  |
| O  | 3.389424000  | -2.079311000 | -2.264343000 |
| Cl | 8.095539000  | -0.826772000 | 0.098675000  |
| H  | -3.993439000 | 0.380918000  | 3.582027000  |

**4-<sup>4</sup>int1**(hs, hs)

|    |              |              |              |
|----|--------------|--------------|--------------|
| Fe | -2.450345000 | 0.319449000  | 1.497132000  |
| N  | -0.913235000 | -0.011014000 | 0.163397000  |
| N  | -1.007667000 | 1.362161000  | 2.616191000  |
| N  | -1.760664000 | -1.488951000 | 2.345180000  |
| N  | -3.617103000 | -0.786184000 | 0.144412000  |
| N  | -2.876052000 | 2.054748000  | 0.435102000  |
| C  | -0.169519000 | 0.819817000  | 3.561296000  |
| C  | 0.615521000  | 1.892925000  | 4.155385000  |
| H  | 1.360937000  | 1.757248000  | 4.927654000  |
| C  | 0.240542000  | 3.058041000  | 3.538141000  |
| H  | 0.621297000  | 4.055983000  | 3.709763000  |
| C  | -0.778316000 | 2.715261000  | 2.556284000  |
| C  | -1.384206000 | 3.599096000  | 1.656876000  |
| H  | -1.056682000 | 4.633217000  | 1.704880000  |
| C  | -2.324890000 | 3.294921000  | 0.667012000  |
| C  | -2.863489000 | 4.230265000  | -0.308190000 |
| H  | -2.601629000 | 5.278174000  | -0.366308000 |
| C  | -3.721151000 | 3.527587000  | -1.114745000 |
| H  | -4.292476000 | 3.891777000  | -1.957862000 |
| C  | -3.721902000 | 2.150291000  | -0.646876000 |
| C  | -4.437360000 | 1.093116000  | -1.219518000 |
| H  | -5.066260000 | 1.344371000  | -2.068242000 |
| C  | -4.393562000 | -0.257575000 | -0.858174000 |
| C  | -5.106406000 | -1.343498000 | -1.515660000 |
| H  | -5.791306000 | -1.220209000 | -2.344048000 |
| C  | -4.724016000 | -2.508144000 | -0.902030000 |
| H  | -5.035965000 | -3.517785000 | -1.133729000 |
| C  | -3.774059000 | -2.152003000 | 0.142630000  |
| C  | -3.090828000 | -3.050520000 | 0.969691000  |
| H  | -3.283259000 | -4.104620000 | 0.793769000  |
| C  | -2.140895000 | -2.753183000 | 1.954296000  |
| C  | -1.357047000 | -3.724683000 | 2.702317000  |
| H  | -1.438569000 | -4.797599000 | 2.592586000  |
| C  | -0.503560000 | -3.020910000 | 3.512477000  |
| H  | 0.244990000  | -3.409899000 | 4.189206000  |
| C  | -0.750920000 | -1.606773000 | 3.274118000  |
| C  | -0.050481000 | -0.543032000 | 3.855588000  |
| H  | 0.708360000  | -0.811772000 | 4.584395000  |
| Fe | 0.399598000  | -0.244794000 | -1.038823000 |
| N  | 1.655728000  | -0.811433000 | 0.420873000  |
| N  | 0.947334000  | 1.667457000  | -0.759005000 |
| N  | -0.843346000 | 0.328890000  | -2.498485000 |
| N  | -0.158474000 | -2.150216000 | -1.291442000 |
| C  | 2.340558000  | 0.017240000  | 1.289788000  |
| C  | 3.132701000  | -0.779672000 | 2.199207000  |

|    |              |              |              |
|----|--------------|--------------|--------------|
| H  | 3.775202000  | -0.369131000 | 2.964911000  |
| C  | 2.928068000  | -2.089065000 | 1.867280000  |
| H  | 3.356002000  | -2.974245000 | 2.315872000  |
| C  | 1.986011000  | -2.107735000 | 0.770702000  |
| C  | 1.430955000  | -3.252134000 | 0.225041000  |
| H  | 1.780767000  | -4.207129000 | 0.599676000  |
| C  | 0.411837000  | -3.263977000 | -0.710917000 |
| C  | -0.282030000 | -4.453645000 | -1.157047000 |
| H  | -0.024510000 | -5.457609000 | -0.850467000 |
| C  | -1.283775000 | -4.043862000 | -1.989579000 |
| H  | -2.015148000 | -4.641871000 | -2.514868000 |
| C  | -1.191921000 | -2.601448000 | -2.084553000 |
| C  | -1.976614000 | -1.814342000 | -2.911115000 |
| H  | -2.768443000 | -2.303628000 | -3.465326000 |
| C  | -1.789948000 | -0.458405000 | -3.122164000 |
| C  | -2.513576000 | 0.331884000  | -4.095512000 |
| H  | -3.312215000 | -0.050710000 | -4.715440000 |
| C  | -1.982318000 | 1.589970000  | -4.065087000 |
| H  | -2.263696000 | 2.457326000  | -4.645749000 |
| C  | -0.948098000 | 1.589202000  | -3.051323000 |
| C  | -0.246845000 | 2.711060000  | -2.639873000 |
| H  | -0.445748000 | 3.644477000  | -3.154877000 |
| C  | 0.608128000  | 2.748620000  | -1.549727000 |
| C  | 1.195417000  | 3.952396000  | -1.002016000 |
| H  | 1.080137000  | 4.936641000  | -1.434260000 |
| C  | 1.855831000  | 3.592401000  | 0.139823000  |
| H  | 2.407577000  | 4.216615000  | 0.828377000  |
| C  | 1.706348000  | 2.162055000  | 0.283940000  |
| C  | 2.334072000  | 1.400463000  | 1.254553000  |
| H  | 2.908572000  | 1.924084000  | 2.008278000  |
| O  | -3.819505000 | 0.503979000  | 2.786334000  |
| O  | 1.853507000  | -0.515414000 | -2.455064000 |
| C  | 3.004235000  | -1.092430000 | -2.194088000 |
| C  | 4.072907000  | -0.177228000 | -1.624339000 |
| C  | 3.960132000  | 1.216220000  | -1.723510000 |
| C  | 5.175076000  | -0.743472000 | -0.961203000 |
| C  | 4.933557000  | 2.046827000  | -1.158648000 |
| H  | 3.086974000  | 1.621611000  | -2.217536000 |
| C  | 6.111804000  | 0.106756000  | -0.395931000 |
| H  | 5.251382000  | -1.821535000 | -0.903795000 |
| C  | 6.026028000  | 1.495188000  | -0.474618000 |
| H  | 4.831634000  | 3.125581000  | -1.226825000 |
| H  | 6.781684000  | 2.122057000  | -0.016026000 |
| O  | 3.283279000  | -2.309871000 | -2.360238000 |
| Cl | 7.559788000  | -0.630450000 | 0.527876000  |
| H  | -3.892452000 | -0.155742000 | 3.504255000  |

#### 4<sup>8</sup>int1<sub>(is, is)</sub>

|    |              |              |              |
|----|--------------|--------------|--------------|
| Fe | -2.660807000 | 0.174761000  | 1.385168000  |
| N  | -0.905593000 | 0.014460000  | 0.079533000  |
| N  | -1.239651000 | 0.773948000  | 2.765689000  |
| N  | -2.231787000 | -1.753459000 | 1.817433000  |
| N  | -3.781046000 | -0.443472000 | -0.198749000 |
| N  | -2.754302000 | 2.073370000  | 0.698904000  |
| C  | -0.487531000 | -0.044074000 | 3.582807000  |
| C  | 0.388849000  | 0.762248000  | 4.407741000  |
| H  | 1.088000000  | 0.363304000  | 5.129570000  |
| C  | 0.169151000  | 2.068753000  | 4.064757000  |
| H  | 0.653833000  | 2.956288000  | 4.447517000  |
| C  | -0.836461000 | 2.067899000  | 3.021938000  |
| C  | -1.271031000 | 3.190886000  | 2.331466000  |
| H  | -0.850721000 | 4.147993000  | 2.621071000  |
| C  | -2.136843000 | 3.182677000  | 1.247176000  |
| C  | -2.490626000 | 4.362229000  | 0.484409000  |
| H  | -2.131803000 | 5.358473000  | 0.703107000  |
| C  | -3.309658000 | 3.953212000  | -0.530297000 |
| H  | -3.762754000 | 4.544987000  | -1.313514000 |
| C  | -3.470453000 | 2.520467000  | -0.394225000 |
| C  | -4.221512000 | 1.732899000  | -1.254551000 |
| H  | -4.713144000 | 2.231068000  | -2.082992000 |
| C  | -4.362312000 | 0.356391000  | -1.161251000 |
| C  | -5.118919000 | -0.462434000 | -2.085134000 |
| H  | -5.667336000 | -0.079012000 | -2.934546000 |
| C  | -4.979048000 | -1.760326000 | -1.675154000 |

|    |              |              |              |
|----|--------------|--------------|--------------|
| H  | -5.387994000 | -2.656261000 | -2.121634000 |
| C  | -4.130365000 | -1.743561000 | -0.502104000 |
| C  | -3.687010000 | -2.872455000 | 0.170701000  |
| H  | -4.022499000 | -3.836733000 | -0.195388000 |
| C  | -2.788494000 | -2.871186000 | 1.227545000  |
| C  | -2.247006000 | -4.067055000 | 1.839547000  |
| H  | -2.514732000 | -5.073840000 | 1.550677000  |
| C  | -1.348571000 | -3.660786000 | 2.785414000  |
| H  | -0.729933000 | -4.265784000 | 3.433442000  |
| C  | -1.338962000 | -2.212085000 | 2.768839000  |
| C  | -0.535444000 | -1.431372000 | 3.587647000  |
| H  | 0.135087000  | -1.950951000 | 4.263570000  |
| Fe | 0.575302000  | -0.147615000 | -1.043559000 |
| N  | 1.633746000  | -1.080836000 | 0.418888000  |
| N  | 1.168386000  | 1.629323000  | -0.310341000 |
| N  | -0.522874000 | 0.799136000  | -2.452310000 |
| N  | -0.215042000 | -1.902882000 | -1.578868000 |
| C  | 2.399676000  | -0.486913000 | 1.403713000  |
| C  | 3.003098000  | -1.502634000 | 2.244015000  |
| H  | 3.660828000  | -1.293917000 | 3.076284000  |
| C  | 2.580439000  | -2.711150000 | 1.770115000  |
| H  | 2.814926000  | -3.701001000 | 2.136358000  |
| C  | 1.710919000  | -2.440932000 | 0.642010000  |
| C  | 1.003800000  | -3.406507000 | -0.053028000 |
| H  | 1.147706000  | -4.441403000 | 0.237325000  |
| C  | 0.096606000  | -3.148776000 | -1.067836000 |
| C  | -0.680168000 | -4.162836000 | -1.743824000 |
| H  | -0.619342000 | -5.220451000 | -1.528340000 |
| C  | -1.462236000 | -3.521040000 | -2.664055000 |
| H  | -2.174241000 | -3.944388000 | -3.358908000 |
| C  | -1.162218000 | -2.110009000 | -2.564394000 |
| C  | -1.724835000 | -1.133652000 | -3.372894000 |
| H  | -2.470409000 | -1.452690000 | -4.093106000 |
| C  | -1.418673000 | 0.216591000  | -3.322809000 |
| C  | -2.033650000 | 1.234381000  | -4.155417000 |
| H  | -2.771163000 | 1.033339000  | -4.920287000 |
| C  | -1.512155000 | 2.434164000  | -3.765161000 |
| H  | -1.735192000 | 3.423542000  | -4.140463000 |
| C  | -0.583465000 | 2.156996000  | -2.684203000 |
| C  | 0.075068000  | 3.125450000  | -1.944360000 |
| H  | -0.079989000 | 4.162438000  | -2.222950000 |
| C  | 0.867926000  | 2.876900000  | -0.832673000 |
| C  | 1.500981000  | 3.903412000  | -0.038084000 |
| H  | 1.421672000  | 4.963505000  | -0.236650000 |
| C  | 2.176629000  | 3.270724000  | 0.971499000  |
| H  | 2.769714000  | 3.705694000  | 1.763944000  |
| C  | 1.970601000  | 1.853717000  | 0.795833000  |
| C  | 2.548012000  | 0.875845000  | 1.590607000  |
| H  | 3.165383000  | 1.205943000  | 2.418337000  |
| O  | -4.100184000 | 0.337073000  | 2.627978000  |
| O  | 2.067936000  | -0.319384000 | -2.299822000 |
| C  | 3.202102000  | -0.949822000 | -2.048953000 |
| C  | 4.289023000  | -0.084045000 | -1.451085000 |
| C  | 4.164152000  | 1.311525000  | -1.409021000 |
| C  | 5.425716000  | -0.703645000 | -0.904265000 |
| C  | 5.162748000  | 2.090650000  | -0.815290000 |
| H  | 3.266843000  | 1.757263000  | -1.817558000 |
| C  | 6.392072000  | 0.095931000  | -0.315491000 |
| H  | 5.505038000  | -1.782274000 | -0.950904000 |
| C  | 6.294682000  | 1.484730000  | -0.252665000 |
| H  | 5.051800000  | 3.169404000  | -0.768511000 |
| H  | 7.072961000  | 2.071271000  | 0.221198000  |
| O  | 3.427446000  | -2.166355000 | -2.261127000 |
| Cl | 7.896815000  | -0.712251000 | 0.438651000  |
| H  | -3.877330000 | 0.580603000  | 3.549645000  |

#### 4<sup>4</sup>int1<sub>(is, is)</sub>

|    |              |              |              |
|----|--------------|--------------|--------------|
| Fe | -2.323804000 | 0.112292000  | 1.346010000  |
| N  | -0.930998000 | 0.000302000  | 0.150946000  |
| N  | -1.022688000 | 0.785472000  | 2.738909000  |
| N  | -1.928754000 | -1.784543000 | 1.941185000  |
| N  | -3.543547000 | -0.577609000 | -0.105854000 |
| N  | -2.667993000 | 2.000227000  | 0.720375000  |
| C  | -0.240621000 | 0.033458000  | 3.594140000  |

|    |              |              |              |
|----|--------------|--------------|--------------|
| C  | 0.551300000  | 0.909584000  | 4.431061000  |
| H  | 1.251365000  | 0.567865000  | 5.180897000  |
| C  | 0.239686000  | 2.191869000  | 4.073367000  |
| H  | 0.633909000  | 3.117871000  | 4.469056000  |
| C  | -0.737571000 | 2.110020000  | 3.007956000  |
| C  | -1.260941000 | 3.205639000  | 2.338369000  |
| H  | -0.918423000 | 4.186920000  | 2.649343000  |
| C  | -2.143082000 | 3.149092000  | 1.270228000  |
| C  | -2.623730000 | 4.307888000  | 0.540360000  |
| H  | -2.352986000 | 5.329188000  | 0.770501000  |
| C  | -3.431819000 | 3.841871000  | -0.456835000 |
| H  | -3.964778000 | 4.401386000  | -1.213279000 |
| C  | -3.456362000 | 2.396171000  | -0.337944000 |
| C  | -4.173218000 | 1.549198000  | -1.168264000 |
| H  | -4.739453000 | 1.999224000  | -1.976280000 |
| C  | -4.220268000 | 0.169305000  | -1.046624000 |
| C  | -5.006576000 | -0.705035000 | -1.893297000 |
| H  | -5.623270000 | -0.365938000 | -2.714185000 |
| C  | -4.799166000 | -1.980728000 | -1.449905000 |
| H  | -5.209832000 | -2.904870000 | -1.832984000 |
| C  | -3.877856000 | -1.895860000 | -0.333850000 |
| C  | -3.391825000 | -2.989676000 | 0.367188000  |
| H  | -3.722017000 | -3.972049000 | 0.046496000  |
| C  | -2.473698000 | -2.935865000 | 1.404971000  |
| C  | -1.902116000 | -4.097836000 | 2.055114000  |
| H  | -2.159053000 | -5.119811000 | 1.812755000  |
| C  | -0.994306000 | -3.639418000 | 2.968096000  |
| H  | -0.356917000 | -4.207902000 | 3.631196000  |
| C  | -1.010175000 | -2.193155000 | 2.890489000  |
| C  | -0.221278000 | -1.351787000 | 3.659930000  |
| H  | 0.468940000  | -1.810814000 | 4.358868000  |
| Fe | 0.361625000  | -0.090078000 | -0.975850000 |
| N  | 1.588526000  | -0.844694000 | 0.450512000  |
| N  | 0.916934000  | 1.782390000  | -0.456471000 |
| N  | -0.807720000 | 0.670566000  | -2.432222000 |
| N  | -0.191590000 | -1.952910000 | -1.473266000 |
| C  | 2.341949000  | -0.124967000 | 1.357058000  |
| C  | 3.073567000  | -1.031419000 | 2.217371000  |
| H  | 3.747848000  | -0.716083000 | 3.001185000  |
| C  | 2.744085000  | -2.299574000 | 1.831873000  |
| H  | 3.090023000  | -3.240439000 | 2.236651000  |
| C  | 1.803792000  | -2.177737000 | 0.737509000  |
| C  | 1.183617000  | -3.243289000 | 0.108428000  |
| H  | 1.435932000  | -4.241900000 | 0.446898000  |
| C  | 0.251403000  | -3.131004000 | -0.909033000 |
| C  | -0.410465000 | -4.252948000 | -1.539716000 |
| H  | -0.234913000 | -5.287204000 | -1.278993000 |
| C  | -1.252980000 | -3.740213000 | -2.484612000 |
| H  | -1.912679000 | -4.266616000 | -3.160428000 |
| C  | -1.108833000 | -2.299752000 | -2.443696000 |
| C  | -1.784006000 | -1.421274000 | -3.275614000 |
| H  | -2.487313000 | -1.846346000 | -3.983005000 |
| C  | -1.631430000 | -0.044010000 | -3.274676000 |
| C  | -2.322072000 | 0.861220000  | -4.172165000 |
| H  | -3.027835000 | 0.548605000  | -4.929392000 |
| C  | -1.905728000 | 2.124169000  | -3.860889000 |
| H  | -2.200751000 | 3.063609000  | -4.307956000 |
| C  | -0.963681000 | 1.999586000  | -2.765867000 |
| C  | -0.345737000 | 3.067573000  | -2.135905000 |
| H  | -0.581180000 | 4.064865000  | -2.491493000 |
| C  | 0.515022000  | 2.961850000  | -1.054286000 |
| C  | 1.113627000  | 4.084234000  | -0.366016000 |
| H  | 0.955702000  | 5.119068000  | -0.636684000 |
| C  | 1.863992000  | 3.572778000  | 0.657444000  |
| H  | 2.453134000  | 4.101596000  | 1.393845000  |
| C  | 1.738387000  | 2.134304000  | 0.597748000  |
| C  | 2.398334000  | 1.255125000  | 1.441446000  |
| H  | 3.019288000  | 1.682935000  | 2.219931000  |
| O  | -3.740123000 | 0.249778000  | 2.510236000  |
| O  | 1.819199000  | -0.185525000 | -2.287437000 |
| C  | 2.950154000  | -0.848536000 | -2.120132000 |
| C  | 4.087051000  | -0.024303000 | -1.557464000 |
| C  | 4.004160000  | 1.373292000  | -1.486770000 |
| C  | 5.227179000  | -0.685307000 | -1.069695000 |
| C  | 5.050768000  | 2.113250000  | -0.926713000 |

|    |              |              |              |
|----|--------------|--------------|--------------|
| H  | 3.102121000  | 1.851052000  | -1.846140000 |
| C  | 6.240803000  | 0.076000000  | -0.510314000 |
| H  | 5.272899000  | -1.764737000 | -1.136101000 |
| C  | 6.187598000  | 1.465788000  | -0.423157000 |
| H  | 4.975541000  | 3.194335000  | -0.861102000 |
| H  | 7.002595000  | 2.021892000  | 0.024950000  |
| O  | 3.138605000  | -2.060806000 | -2.384432000 |
| Cl | 7.750594000  | -0.787847000 | 0.167063000  |
| H  | -3.549565000 | -0.309296000 | 3.295248000  |

#### 4-<sup>2</sup>int1(is, is)

|    |              |              |              |
|----|--------------|--------------|--------------|
| Fe | -2.549253000 | 0.206627000  | 1.325901000  |
| N  | -0.961235000 | 0.030984000  | 0.122521000  |
| N  | -1.784568000 | 2.006167000  | 1.845166000  |
| N  | -1.390292000 | -0.677566000 | 2.727655000  |
| N  | -3.090429000 | -1.615774000 | 0.637178000  |
| N  | -3.472915000 | 1.066057000  | -0.255283000 |
| C  | -0.932542000 | 2.268914000  | 2.899527000  |
| C  | -0.671304000 | 3.690776000  | 2.977071000  |
| H  | -0.028810000 | 4.152592000  | 3.713938000  |
| C  | -1.361510000 | 4.279337000  | 1.955147000  |
| H  | -1.403597000 | 5.324263000  | 1.680498000  |
| C  | -2.051907000 | 3.221856000  | 1.247317000  |
| C  | -2.838141000 | 3.414129000  | 0.123002000  |
| H  | -2.930360000 | 4.426063000  | -0.255758000 |
| C  | -3.488759000 | 2.409356000  | -0.573927000 |
| C  | -4.284331000 | 2.622298000  | -1.765500000 |
| H  | -4.445765000 | 3.587444000  | -2.225224000 |
| C  | -4.743351000 | 1.398520000  | -2.162294000 |
| H  | -5.358341000 | 1.150427000  | -3.016182000 |
| C  | -4.229247000 | 0.427967000  | -1.218028000 |
| C  | -4.450558000 | -0.937110000 | -1.298872000 |
| H  | -5.056651000 | -1.297831000 | -2.122558000 |
| C  | -3.915907000 | -1.881118000 | -0.437686000 |
| C  | -4.113215000 | -3.310000000 | -0.563754000 |
| H  | -4.714697000 | -3.776237000 | -1.331700000 |
| C  | -3.391258000 | -3.901922000 | 0.433557000  |
| H  | -3.277556000 | -4.954280000 | 0.653716000  |
| C  | -2.750075000 | -2.839246000 | 1.179226000  |
| C  | -1.903025000 | -3.038530000 | 2.257081000  |
| H  | -1.697732000 | -4.062161000 | 2.549657000  |
| C  | -1.268981000 | -2.031947000 | 2.966327000  |
| C  | -0.359539000 | -2.256716000 | 4.071409000  |
| H  | -0.088259000 | -3.233276000 | 4.447417000  |
| C  | 0.068077000  | -1.029783000 | 4.491513000  |
| H  | 0.764113000  | -0.790020000 | 5.283181000  |
| C  | -0.574942000 | -0.045334000 | 3.645174000  |
| C  | -0.370306000 | 1.321288000  | 3.739386000  |
| H  | 0.311657000  | 1.673063000  | 4.505691000  |
| Fe | 0.432704000  | -0.163896000 | -0.920975000 |
| N  | 1.630713000  | 0.485675000  | 0.571807000  |
| N  | 0.185250000  | 1.738940000  | -1.564107000 |
| N  | -0.779507000 | -0.798618000 | -2.398824000 |
| N  | 0.686372000  | -2.050443000 | -0.270338000 |
| C  | 1.897663000  | 1.802477000  | 0.892554000  |
| C  | 2.779615000  | 1.857747000  | 2.038753000  |
| H  | 3.145537000  | 2.773464000  | 2.481997000  |
| C  | 3.046025000  | 0.567799000  | 2.401615000  |
| H  | 3.670398000  | 0.206940000  | 3.206876000  |
| C  | 2.312163000  | -0.285999000 | 1.492663000  |
| C  | 2.267916000  | -1.668767000 | 1.571359000  |
| H  | 2.855025000  | -2.145803000 | 2.348214000  |
| C  | 1.497331000  | -2.482821000 | 0.757696000  |
| C  | 1.407225000  | -3.922953000 | 0.882772000  |
| H  | 1.953101000  | -4.506843000 | 1.610622000  |
| C  | 0.532517000  | -4.350255000 | -0.073768000 |
| H  | 0.212139000  | -5.358701000 | -0.295797000 |
| C  | 0.091222000  | -3.175737000 | -0.798802000 |
| C  | -0.784540000 | -3.202436000 | -1.871467000 |
| H  | -1.188608000 | -4.166649000 | -2.159362000 |
| C  | -1.177666000 | -2.100667000 | -2.615513000 |
| C  | -2.063905000 | -2.157621000 | -3.760646000 |
| H  | -2.515198000 | -3.065101000 | -4.137454000 |
| C  | -2.189543000 | -0.881118000 | -4.231560000 |

|    |              |              |              |
|----|--------------|--------------|--------------|
| H  | -2.767734000 | -0.524295000 | -5.072790000 |
| C  | -1.386802000 | -0.033894000 | -3.372645000 |
| C  | -1.273802000 | 1.341305000  | -3.504269000 |
| H  | -1.825147000 | 1.815116000  | -4.309402000 |
| C  | -0.552573000 | 2.162427000  | -2.651721000 |
| C  | -0.514395000 | 3.607485000  | -2.738127000 |
| H  | -1.012032000 | 4.186256000  | -3.504136000 |
| C  | 0.230998000  | 4.050720000  | -1.681294000 |
| H  | 0.472774000  | 5.067564000  | -1.403726000 |
| C  | 0.663133000  | 2.879083000  | -0.947417000 |
| C  | 1.442003000  | 2.913076000  | 0.200056000  |
| H  | 1.723601000  | 3.887969000  | 0.582326000  |
| O  | -3.874968000 | 0.349875000  | 2.331514000  |
| O  | 1.978508000  | -0.390789000 | -2.119899000 |
| C  | 3.109482000  | -1.019506000 | -1.868580000 |
| C  | 4.235403000  | -0.133943000 | -1.376225000 |
| C  | 4.090513000  | 1.259178000  | -1.324451000 |
| C  | 5.434173000  | -0.730542000 | -0.950189000 |
| C  | 5.131914000  | 2.057643000  | -0.840493000 |
| H  | 3.150991000  | 1.687815000  | -1.647206000 |
| C  | 6.445072000  | 0.088678000  | -0.473415000 |
| H  | 5.526423000  | -1.808001000 | -1.003446000 |
| C  | 6.330217000  | 1.475336000  | -0.403835000 |
| H  | 5.011565000  | 3.135648000  | -0.789733000 |
| H  | 7.144386000  | 2.078185000  | -0.019348000 |
| Cl | 8.038078000  | -0.690684000 | 0.112477000  |
| O  | 3.317055000  | -2.250025000 | -2.015773000 |

#### 4-<sup>4</sup>ts<sub>2</sub>(hs, hs)

|    |              |              |              |
|----|--------------|--------------|--------------|
| Fe | 2.304386000  | -0.131791000 | 1.029041000  |
| N  | 0.867550000  | 0.006657000  | 0.094844000  |
| N  | 2.444888000  | -2.160149000 | 0.623251000  |
| N  | 1.203546000  | -0.529954000 | 2.743155000  |
| N  | 2.293752000  | 1.897454000  | 1.500888000  |
| N  | 3.477058000  | 0.287990000  | -0.658041000 |
| C  | 1.866078000  | -3.163370000 | 1.360366000  |
| C  | 2.168990000  | -4.439398000 | 0.727815000  |
| H  | 1.835964000  | -5.401715000 | 1.092761000  |
| C  | 2.926208000  | -4.170607000 | -0.381458000 |
| H  | 3.330717000  | -4.870404000 | -1.100267000 |
| C  | 3.096111000  | -2.725735000 | -0.446140000 |
| C  | 3.795238000  | -2.028888000 | -1.434990000 |
| H  | 4.239840000  | -2.629055000 | -2.222934000 |
| C  | 3.973348000  | -0.646940000 | -1.533679000 |
| C  | 4.722923000  | 0.042011000  | -2.574229000 |
| H  | 5.221669000  | -0.447397000 | -3.399976000 |
| C  | 4.660162000  | 1.382545000  | -2.298137000 |
| H  | 5.095822000  | 2.200949000  | -2.855328000 |
| C  | 3.871964000  | 1.532348000  | -1.082935000 |
| C  | 3.564564000  | 2.737788000  | -0.445736000 |
| H  | 3.913580000  | 3.643970000  | -0.930856000 |
| C  | 2.829410000  | 2.908867000  | 0.729622000  |
| C  | 2.478356000  | 4.184645000  | 1.330748000  |
| H  | 2.765266000  | 5.149226000  | 0.934273000  |
| C  | 1.718816000  | 3.917761000  | 2.439552000  |
| H  | 1.266223000  | 4.622226000  | 3.124106000  |
| C  | 1.593037000  | 2.473522000  | 2.539895000  |
| C  | 0.864679000  | 1.783464000  | 3.512246000  |
| H  | 0.359559000  | 2.390762000  | 4.256604000  |
| C  | 0.685020000  | 0.401388000  | 3.609434000  |
| C  | -0.088055000 | -0.291666000 | 4.630263000  |
| H  | -0.614726000 | 0.195223000  | 5.439869000  |
| C  | -0.017917000 | -1.630132000 | 4.349982000  |
| H  | -0.477479000 | -2.449929000 | 4.885361000  |
| C  | 0.797255000  | -1.777828000 | 3.152367000  |
| C  | 1.104516000  | -2.983760000 | 2.518543000  |
| H  | 0.690416000  | -3.881674000 | 2.966803000  |
| Fe | -0.511436000 | 0.152134000  | -0.797938000 |
| N  | -1.312174000 | -1.475929000 | 0.108324000  |
| N  | 0.251712000  | -1.028762000 | -2.243226000 |
| N  | 0.199473000  | 1.776422000  | -1.747531000 |
| N  | -1.380911000 | 1.331475000  | 0.585885000  |
| C  | -1.168612000 | -2.790782000 | -0.287314000 |
| C  | -1.871579000 | -3.658247000 | 0.634057000  |

|    |              |              |              |
|----|--------------|--------------|--------------|
| H  | -1.911959000 | -4.735249000 | 0.546071000  |
| C  | -2.434771000 | -2.856031000 | 1.586701000  |
| H  | -3.036671000 | -3.137579000 | 2.439354000  |
| C  | -2.078756000 | -1.493735000 | 1.256043000  |
| C  | -2.469302000 | -0.380795000 | 1.981257000  |
| H  | -3.070274000 | -0.546150000 | 2.868203000  |
| C  | -2.142952000 | 0.926840000  | 1.664787000  |
| C  | -2.560622000 | 2.082645000  | 2.429737000  |
| H  | -3.174108000 | 2.034174000  | 3.318525000  |
| C  | -2.041401000 | 3.181114000  | 1.807083000  |
| H  | -2.140687000 | 4.222909000  | 2.077617000  |
| C  | -1.305930000 | 2.706999000  | 0.654812000  |
| C  | -0.635635000 | 3.525960000  | -0.236039000 |
| H  | -0.657615000 | 4.593100000  | -0.047169000 |
| C  | 0.055594000  | 3.088481000  | -1.351539000 |
| C  | 0.741717000  | 3.959730000  | -2.283621000 |
| H  | 0.775276000  | 5.036811000  | -2.196722000 |
| C  | 1.299054000  | 3.160497000  | -3.239797000 |
| H  | 1.888717000  | 3.443620000  | -4.100646000 |
| C  | 0.956621000  | 1.794103000  | -2.899648000 |
| C  | 1.339522000  | 0.684092000  | -3.633210000 |
| H  | 1.955458000  | 0.851016000  | -4.509913000 |
| C  | 1.007276000  | -0.624459000 | -3.323933000 |
| C  | 1.416793000  | -1.779718000 | -4.095451000 |
| H  | 2.019529000  | -1.730506000 | -4.991757000 |
| C  | 0.907443000  | -2.879967000 | -3.466561000 |
| H  | 1.005493000  | -3.921771000 | -3.738699000 |
| C  | 0.182402000  | -2.405694000 | -2.305669000 |
| C  | -0.473819000 | -3.227307000 | -1.403951000 |
| H  | -0.428332000 | -4.296711000 | -1.578072000 |
| O  | 3.921091000  | -0.319725000 | 2.011385000  |
| O  | -2.171432000 | 0.263227000  | -1.888176000 |
| C  | -3.278721000 | 0.924505000  | -1.626982000 |
| C  | -4.450044000 | 0.052774000  | -1.217119000 |
| C  | -4.326130000 | -1.342552000 | -1.143925000 |
| C  | -5.664578000 | 0.667106000  | -0.866502000 |
| C  | -5.403719000 | -2.123779000 | -0.713243000 |
| H  | -3.375285000 | -1.785731000 | -1.407816000 |
| C  | -6.713159000 | -0.135785000 | -0.446212000 |
| H  | -5.737622000 | 1.745704000  | -0.926291000 |
| C  | -6.619326000 | -1.523001000 | -0.355679000 |
| H  | -5.297349000 | -3.201848000 | -0.641733000 |
| H  | -7.462786000 | -2.112322000 | -0.015782000 |
| O  | -3.434593000 | 2.170743000  | -1.685662000 |
| Cl | -8.330618000 | 0.666947000  | 0.031197000  |
| H  | 4.198497000  | 0.573457000  | 2.313525000  |
| C  | 6.202244000  | -0.814607000 | 1.148944000  |
| H  | 6.062030000  | 0.001594000  | 0.451549000  |
| H  | 6.710486000  | -0.652607000 | 2.093375000  |
| H  | 5.737486000  | -1.767908000 | 0.940392000  |

#### 4-<sup>8</sup>ts<sub>2</sub>(is, is)

|    |              |              |              |
|----|--------------|--------------|--------------|
| Fe | 2.479150000  | -0.467156000 | 1.032567000  |
| N  | 0.945233000  | 0.050577000  | -0.059009000 |
| N  | 1.221139000  | -1.673950000 | 2.137884000  |
| N  | 1.960138000  | 1.171025000  | 2.236407000  |
| N  | 3.663244000  | 0.763151000  | -0.123065000 |
| N  | 2.729368000  | -2.013594000 | -0.365051000 |
| C  | 0.507714000  | -1.293650000 | 3.250927000  |
| C  | -0.228420000 | -2.445848000 | 3.752856000  |
| H  | -0.875241000 | -2.431630000 | 4.619677000  |
| C  | 0.041611000  | -3.493580000 | 2.914920000  |
| H  | -0.341965000 | -4.503858000 | 2.961251000  |
| C  | 0.944534000  | -2.998279000 | 1.885134000  |
| C  | 1.397490000  | -3.732750000 | 0.786742000  |
| H  | 1.052707000  | -4.760191000 | 0.720821000  |
| C  | 2.203567000  | -3.278820000 | -0.260304000 |
| C  | 2.624289000  | -4.056331000 | -1.415962000 |
| H  | 2.351224000  | -5.086979000 | -1.599166000 |
| C  | 3.399095000  | -3.235494000 | -2.194957000 |
| H  | 3.881279000  | -3.467716000 | -3.135044000 |
| C  | 3.466253000  | -1.947464000 | -1.522128000 |
| C  | 4.170690000  | -0.821693000 | -1.958282000 |
| H  | 4.683716000  | -0.909607000 | -2.911181000 |

|    |              |              |              |    |              |              |              |
|----|--------------|--------------|--------------|----|--------------|--------------|--------------|
| C  | 4.250222000  | 0.422249000  | -1.326945000 | Fe | 2.428982000  | -0.364580000 | 0.997579000  |
| C  | 4.901214000  | 1.599131000  | -1.879112000 | N  | 0.871274000  | 0.038041000  | 0.012624000  |
| H  | 5.441213000  | 1.617748000  | -2.816284000 | N  | 1.808883000  | -2.329314000 | 1.055934000  |
| C  | 4.661992000  | 2.637706000  | -1.019112000 | N  | 1.316673000  | 0.038436000  | 2.739806000  |
| H  | 4.967166000  | 3.670860000  | -1.116594000 | N  | 2.988434000  | 1.608038000  | 0.902770000  |
| C  | 3.859076000  | 2.116128000  | 0.074851000  | N  | 3.393085000  | -0.721863000 | -0.845096000 |
| C  | 3.309743000  | 2.884743000  | 1.104449000  | C  | 1.034505000  | -2.902418000 | 2.038485000  |
| H  | 3.559141000  | 3.941431000  | 1.100347000  | C  | 0.854900000  | -4.312528000 | 1.727355000  |
| C  | 2.424582000  | 2.456478000  | 2.097019000  | H  | 0.285539000  | -5.007354000 | 2.329968000  |
| C  | 1.839241000  | 3.282392000  | 3.142024000  | C  | 1.516756000  | -4.555563000 | 0.552975000  |
| H  | 2.022850000  | 4.340888000  | 3.268380000  | H  | 1.595560000  | -5.488330000 | 0.010824000  |
| C  | 1.030985000  | 2.468552000  | 3.892849000  | C  | 2.113025000  | -3.298270000 | 0.126581000  |
| H  | 0.426505000  | 2.734600000  | 4.749443000  | C  | 2.850565000  | -3.110489000 | -1.046764000 |
| C  | 1.112822000  | 1.134377000  | 3.317742000  | H  | 2.962190000  | -3.981319000 | -1.685715000 |
| C  | 0.454215000  | -0.004756000 | 3.787410000  | C  | 3.433077000  | -1.925386000 | -1.503867000 |
| H  | -0.191441000 | 0.131105000  | 4.649506000  | C  | 4.170168000  | -1.751707000 | -2.748683000 |
| Fe | -0.629648000 | 0.505438000  | -0.980186000 | H  | 4.351563000  | -2.534134000 | -3.473400000 |
| N  | -1.645968000 | 0.793651000  | 0.753152000  | C  | 4.554758000  | -0.437321000 | -2.809602000 |
| N  | -1.123324000 | -1.442044000 | -0.926353000 | H  | 5.111925000  | 0.059067000  | -3.592890000 |
| N  | 0.418967000  | 0.190873000  | -2.676889000 | C  | 4.058352000  | 0.208718000  | -1.601908000 |
| N  | 0.027173000  | 2.388848000  | -0.890892000 | C  | 4.212336000  | 1.553808000  | -1.253879000 |
| C  | -2.324151000 | -0.158451000 | 1.489651000  | H  | 4.743786000  | 2.181371000  | -1.962756000 |
| C  | -2.936960000 | 0.455904000  | 2.649848000  | C  | 3.715918000  | 2.195895000  | -0.115246000 |
| H  | -3.532339000 | -0.076673000 | 3.378180000  | C  | 3.844954000  | 3.614950000  | 0.167464000  |
| C  | -2.613275000 | 1.781732000  | 2.614457000  | H  | 4.366454000  | 4.320292000  | -0.465356000 |
| H  | -2.883123000 | 2.562838000  | 3.311312000  | C  | 3.171586000  | 3.862391000  | 1.334717000  |
| C  | -1.792133000 | 1.984028000  | 1.438626000  | H  | 3.034851000  | 4.809315000  | 1.839310000  |
| C  | -1.192796000 | 3.182895000  | 1.096158000  | C  | 2.616979000  | 2.599636000  | 1.790972000  |
| H  | -1.382683000 | 4.040135000  | 1.731967000  | C  | 1.804697000  | 2.436471000  | 2.917267000  |
| C  | -0.333484000 | 3.359180000  | 0.024856000  | H  | 1.598419000  | 3.333570000  | 3.492660000  |
| C  | 0.340509000  | 4.598775000  | -0.285222000 | C  | 1.198165000  | 1.257130000  | 3.358506000  |
| H  | 0.224602000  | 5.512463000  | 0.280731000  | C  | 0.351665000  | 1.105686000  | 4.534319000  |
| C  | 1.114314000  | 4.368251000  | -1.388883000 | H  | 0.078291000  | 1.907337000  | 5.207113000  |
| H  | 1.762176000  | 5.054921000  | -1.915862000 | C  | -0.017358000 | -0.212660000 | 4.596207000  |
| C  | 0.908512000  | 2.988682000  | -1.770473000 | H  | -0.650818000 | -0.694125000 | 5.329082000  |
| C  | 1.485101000  | 2.393078000  | -2.882050000 | C  | 0.596440000  | -0.883962000 | 3.457882000  |
| H  | 2.177426000  | 2.991609000  | -3.463754000 | C  | 0.477148000  | -2.238188000 | 3.135799000  |
| C  | 1.245952000  | 1.096038000  | -3.306010000 | H  | -0.138560000 | -2.839894000 | 3.797471000  |
| C  | 1.850215000  | 0.483411000  | -4.474248000 | Fe | -0.576252000 | 0.453466000  | -0.864106000 |
| H  | 2.538913000  | 0.985951000  | -5.139427000 | N  | -1.656376000 | -0.707430000 | 0.389858000  |
| C  | 1.387950000  | -0.800096000 | -4.533498000 | N  | -0.263616000 | -1.134143000 | -2.079981000 |
| H  | 1.623609000  | -1.571893000 | -5.253204000 | N  | 0.514049000  | 1.596313000  | -2.111162000 |
| C  | 0.508342000  | -0.982953000 | -3.394334000 | N  | -0.898634000 | 2.021142000  | 0.352674000  |
| C  | -0.089351000 | -2.182432000 | -3.043759000 | C  | -1.833274000 | -2.074255000 | 0.290788000  |
| H  | 0.077626000  | -3.035958000 | -3.691875000 | C  | -2.650377000 | -2.541994000 | 1.389412000  |
| C  | -0.829194000 | -2.393627000 | -1.889631000 | H  | -2.939111000 | -3.573285000 | 1.536862000  |
| C  | -1.395895000 | -3.665709000 | -1.506439000 | C  | -2.967904000 | -1.449894000 | 2.146082000  |
| H  | -1.304961000 | -4.572738000 | -2.088095000 | H  | -3.567067000 | -1.400554000 | 3.044368000  |
| C  | -2.018844000 | -3.481387000 | -0.301370000 | C  | -2.330349000 | -0.308287000 | 1.527867000  |
| H  | -2.548973000 | -4.203845000 | 0.303335000  | C  | -2.359324000 | 0.981302000  | 2.033425000  |
| C  | -1.851660000 | -2.092960000 | 0.054131000  | H  | -2.928424000 | 1.152361000  | 2.940116000  |
| C  | -2.407050000 | -1.503645000 | 1.178503000  | C  | -1.677727000 | 2.057612000  | 1.490251000  |
| H  | -2.959034000 | -2.143847000 | 1.856687000  | C  | -1.663983000 | 3.391648000  | 2.052518000  |
| O  | 3.911826000  | -0.997158000 | 2.088002000  | H  | -2.201045000 | 3.681740000  | 2.944631000  |
| O  | -2.180484000 | 0.996321000  | -2.023984000 | C  | -0.867788000 | 4.153575000  | 1.247525000  |
| C  | -3.309918000 | 1.483783000  | -1.529343000 | H  | -0.618221000 | 5.201474000  | 1.339171000  |
| C  | -4.361062000 | 0.443898000  | -1.219827000 | C  | -0.399298000 | 3.294479000  | 0.179371000  |
| C  | -4.221895000 | -0.881720000 | -1.654657000 | C  | 0.410616000  | 3.714147000  | -0.862304000 |
| C  | -5.479990000 | 0.818678000  | -0.456585000 | H  | 0.741212000  | 4.746618000  | -0.850291000 |
| C  | -5.189904000 | -1.835874000 | -1.324257000 | C  | 0.822292000  | 2.927389000  | -1.926718000 |
| H  | -3.339473000 | -1.146640000 | -2.222020000 | C  | 1.633166000  | 3.399068000  | -3.030735000 |
| C  | -6.415772000 | -0.152540000 | -0.138919000 | H  | 2.008929000  | 4.408683000  | -3.122641000 |
| H  | -5.572016000 | 1.847863000  | -0.133809000 | C  | 1.804614000  | 2.342393000  | -3.879775000 |
| C  | -6.303757000 | -1.478849000 | -0.551936000 | H  | 2.351739000  | 2.305078000  | -4.811707000 |
| H  | -5.068877000 | -2.864407000 | -1.649199000 | C  | 1.104830000  | 1.215466000  | -3.297969000 |
| H  | -7.057496000 | -2.207332000 | -0.277225000 | C  | 1.060867000  | -0.055133000 | -3.849423000 |
| O  | -3.549811000 | 2.695642000  | -1.318889000 | H  | 1.592469000  | -0.216183000 | -4.780958000 |
| Cl | -7.894716000 | 0.322814000  | 0.893909000  | C  | 0.433988000  | -1.147509000 | -3.271831000 |
| H  | 4.567555000  | -1.724756000 | 4.605452000  | C  | 0.465718000  | -2.492510000 | -3.806250000 |
| C  | 4.216554000  | -2.526729000 | 3.966713000  | H  | 0.951038000  | -2.769464000 | -4.731902000 |
| H  | 3.156850000  | -2.644813000 | 3.787158000  | C  | -0.195657000 | -3.291484000 | -2.915943000 |
| H  | 4.926268000  | -3.125960000 | 3.408455000  | H  | -0.366975000 | -4.358151000 | -2.962186000 |
| H  | 4.748251000  | -0.561656000 | 1.807631000  | C  | -0.645733000 | -2.438912000 | -1.835292000 |
|    |              |              |              | C  | -1.357062000 | -2.881117000 | -0.729835000 |
|    |              |              |              | H  | -1.562976000 | -3.943456000 | -0.661779000 |



|    |              |              |              |
|----|--------------|--------------|--------------|
| O  | 3.947750000  | -0.830976000 | 1.967019000  |
| O  | -2.181612000 | 0.934160000  | -1.879532000 |
| C  | -3.324268000 | 1.401529000  | -1.412056000 |
| C  | -4.384875000 | 0.352420000  | -1.156427000 |
| C  | -4.181665000 | -0.985567000 | -1.520742000 |
| C  | -5.580343000 | 0.734018000  | -0.524183000 |
| C  | -5.161283000 | -1.945611000 | -1.247160000 |
| H  | -3.244546000 | -2.983882000 | -1.991921000 |
| C  | -6.529121000 | -0.242189000 | -0.264985000 |
| H  | -5.718376000 | 1.773680000  | -0.255256000 |
| C  | -6.355034000 | -1.580984000 | -0.608760000 |
| H  | -4.995203000 | -2.983882000 | -1.518033000 |
| H  | -7.121203000 | -2.313062000 | -0.382393000 |
| O  | -3.585934000 | 2.608983000  | -1.187404000 |
| Cl | -8.114926000 | 0.245267000  | 0.591568000  |
| H  | 4.520822000  | -0.049322000 | 2.134379000  |
| H  | 5.836676000  | -2.734469000 | 2.097749000  |
| C  | 4.959829000  | -2.892606000 | 2.714474000  |
| H  | 4.954226000  | -2.562096000 | 3.746278000  |
| H  | 4.054621000  | -3.282422000 | 2.270128000  |

**4-<sup>10</sup>P<sub>(hs, hs)</sub>**

|    |              |              |              |
|----|--------------|--------------|--------------|
| Fe | 2.463267000  | -0.334325000 | 0.953862000  |
| N  | 0.838483000  | 0.048425000  | -0.057797000 |
| N  | 1.336849000  | -0.838329000 | 2.640765000  |
| N  | 2.597404000  | 1.628556000  | 1.694418000  |
| N  | 3.702518000  | 0.155296000  | -0.629297000 |
| N  | 2.519414000  | -2.330742000 | 0.373988000  |
| C  | 0.821959000  | 0.035731000  | 3.574939000  |
| C  | -0.068184000 | -0.695733000 | 4.460678000  |
| H  | -0.621764000 | -0.255265000 | 5.278754000  |
| C  | -0.086941000 | -1.998412000 | 4.032524000  |
| H  | -0.657602000 | -2.824113000 | 4.435524000  |
| C  | 0.789374000  | -2.084018000 | 2.876713000  |
| C  | 1.017650000  | -3.232983000 | 2.112023000  |
| H  | 0.483067000  | -4.125815000 | 2.421831000  |
| C  | 1.794925000  | -3.350496000 | 0.955484000  |
| C  | 1.938357000  | -4.550783000 | 0.144392000  |
| H  | 1.469531000  | -5.500830000 | 0.362001000  |
| C  | 2.730972000  | -4.223293000 | -0.924049000 |
| H  | 3.033766000  | -4.856034000 | -1.747601000 |
| C  | 3.084038000  | -2.818039000 | -0.784561000 |
| C  | 3.819046000  | -2.061384000 | -1.702113000 |
| H  | 4.174728000  | -2.585162000 | -2.584281000 |
| C  | 4.098262000  | -0.691912000 | -1.640151000 |
| C  | 4.817926000  | 0.078222000  | -2.641797000 |
| H  | 5.235099000  | -0.331203000 | -3.551925000 |
| C  | 4.832712000  | 1.381828000  | -2.217639000 |
| H  | 5.266396000  | 2.239805000  | -2.713414000 |
| C  | 4.121993000  | 1.428379000  | -0.949555000 |
| C  | 3.876395000  | 2.580793000  | -0.194547000 |
| H  | 4.239614000  | 3.513669000  | -0.615181000 |
| C  | 3.160362000  | 2.684414000  | 1.001220000  |
| C  | 2.829644000  | 3.923857000  | 1.686253000  |
| H  | 3.133339000  | 4.908214000  | 1.357149000  |
| C  | 2.047339000  | 3.597203000  | 2.763074000  |
| H  | 1.591615000  | 4.264757000  | 3.481937000  |
| C  | 1.885285000  | 2.152014000  | 2.755820000  |
| C  | 1.087391000  | 1.409021000  | 3.631376000  |
| H  | 0.568114000  | 1.967756000  | 4.403919000  |
| Fe | -0.714437000 | 0.395240000  | -1.012583000 |
| N  | -1.547177000 | 1.261903000  | 0.695471000  |
| N  | -1.375903000 | -1.474697000 | -0.358076000 |
| N  | 0.203203000  | -0.519031000 | -2.648571000 |
| N  | 0.179125000  | 2.197514000  | -1.498233000 |
| C  | -2.247140000 | 0.609051000  | 1.683537000  |
| C  | -2.618509000 | 1.572112000  | 2.711945000  |
| H  | -3.185762000 | 1.334075000  | 3.601620000  |
| C  | -2.111077000 | 2.784164000  | 2.329296000  |
| H  | -2.183687000 | 3.732350000  | 2.844949000  |
| C  | -1.423032000 | 2.581656000  | 1.061089000  |
| C  | -0.702246000 | 3.551930000  | 0.363768000  |
| H  | -0.695820000 | 4.549213000  | 0.793116000  |
| C  | 0.042798000  | 3.377584000  | -0.805742000 |

|    |              |              |              |
|----|--------------|--------------|--------------|
| C  | 0.816547000  | 4.404789000  | -1.482331000 |
| H  | 0.887485000  | 5.434735000  | -1.159502000 |
| C  | 1.409777000  | 3.815517000  | -2.569747000 |
| H  | 2.057991000  | 4.272539000  | -3.305600000 |
| C  | 1.005044000  | 2.419325000  | -2.575637000 |
| C  | 1.397997000  | 1.457297000  | -3.511668000 |
| H  | 2.083383000  | 1.791586000  | -4.284908000 |
| C  | 1.046094000  | 0.105862000  | -3.538241000 |
| C  | 1.560073000  | -0.886573000 | -4.474328000 |
| H  | 2.245043000  | -0.671792000 | -5.283684000 |
| C  | 1.033860000  | -2.096185000 | -4.108793000 |
| H  | 1.204060000  | -3.064063000 | -4.561555000 |
| C  | 0.192220000  | -1.862101000 | -2.941259000 |
| C  | -0.461610000 | -2.847114000 | -2.197381000 |
| H  | -0.368855000 | -3.867292000 | -2.558224000 |
| C  | -1.173632000 | -2.674596000 | -1.005561000 |
| C  | -1.815146000 | -3.729222000 | -0.241035000 |
| H  | -1.815928000 | -4.775700000 | -0.515971000 |
| C  | -2.387618000 | -3.142132000 | 0.860103000  |
| H  | -2.951549000 | -3.616311000 | 1.652179000  |
| C  | -2.104716000 | -1.721414000 | 0.785659000  |
| C  | -2.512255000 | -0.760791000 | 1.714956000  |
| H  | -3.077400000 | -1.124689000 | 2.567311000  |
| O  | 4.291847000  | -0.626537000 | 2.293703000  |
| O  | -2.357501000 | 0.781142000  | -2.055162000 |
| C  | -3.488759000 | 1.311070000  | -1.632790000 |
| C  | -4.536853000 | 0.306735000  | -1.197853000 |
| C  | -4.350961000 | -1.069313000 | -1.391628000 |
| C  | -5.702315000 | 0.774112000  | -0.566194000 |
| C  | -5.314248000 | -1.980628000 | -0.945985000 |
| H  | -3.436004000 | -1.400605000 | -1.863580000 |
| C  | -6.635431000 | -0.154973000 | -0.134791000 |
| H  | -5.828019000 | 1.840947000  | -0.430719000 |
| C  | -6.475912000 | -1.528842000 | -0.304107000 |
| H  | -5.152939000 | -3.045772000 | -1.077800000 |
| H  | -7.229100000 | -2.220444000 | 0.054733000  |
| O  | -3.750705000 | 2.537943000  | -1.570379000 |
| Cl | -8.183112000 | 0.448282000  | 0.722338000  |
| H  | 5.199673000  | -1.872576000 | 3.736503000  |
| C  | 4.233029000  | -1.745322000 | 3.233162000  |
| H  | 3.427626000  | -1.602995000 | 3.960965000  |
| H  | 4.005209000  | -2.617095000 | 2.619594000  |
| H  | 4.248551000  | 0.242469000  | 2.743751000  |

**4-<sup>2</sup>P<sub>(hs, hs)</sub>**

|    |              |              |              |
|----|--------------|--------------|--------------|
| Fe | 2.318666000  | -0.277668000 | 0.763142000  |
| N  | 0.787929000  | 0.060920000  | -0.064926000 |
| N  | 1.491003000  | -0.958460000 | 2.578600000  |
| N  | 2.592101000  | 1.607739000  | 1.696412000  |
| N  | 3.628141000  | 0.328163000  | -0.743136000 |
| N  | 2.599466000  | -2.260778000 | 0.191176000  |
| C  | 1.002480000  | -0.159504000 | 3.590094000  |
| C  | 0.224391000  | -0.979332000 | 4.505292000  |
| H  | -0.282125000 | -0.607809000 | 5.385667000  |
| C  | 0.247891000  | -2.260326000 | 4.019939000  |
| H  | -0.236905000 | -3.137352000 | 4.426961000  |
| C  | 1.037862000  | -2.242951000 | 2.799264000  |
| C  | 1.281103000  | -3.341897000 | 1.971743000  |
| H  | 0.834554000  | -4.283055000 | 2.277387000  |
| C  | 1.997421000  | -3.355736000 | 0.770659000  |
| C  | 2.208231000  | -4.514596000 | -0.082365000 |
| H  | 1.838486000  | -5.509237000 | 0.126968000  |
| C  | 2.926075000  | -4.089993000 | -1.169921000 |
| H  | 3.255845000  | -4.671398000 | -2.020316000 |
| C  | 3.164678000  | -2.665810000 | -0.998360000 |
| C  | 3.829485000  | -1.834685000 | -1.904806000 |
| H  | 4.197300000  | -2.307150000 | -2.810526000 |
| C  | 4.048287000  | -0.459495000 | -1.789618000 |
| C  | 4.739119000  | 0.377415000  | -2.760418000 |
| H  | 5.168252000  | 0.020532000  | -3.686858000 |
| C  | 4.717285000  | 1.658134000  | -2.276247000 |
| H  | 5.126964000  | 2.550900000  | -2.729059000 |
| C  | 4.013781000  | 1.621901000  | -1.001656000 |
| C  | 3.753822000  | 2.722798000  | -0.180001000 |

|    |              |              |              |    |              |              |              |
|----|--------------|--------------|--------------|----|--------------|--------------|--------------|
| H  | 4.076412000  | 3.689943000  | -0.553170000 | C  | 0.763598000  | -0.768099000 | 3.498037000  |
| C  | 3.084791000  | 2.725830000  | 1.046687000  | C  | -0.061294000 | -1.734407000 | 4.198362000  |
| C  | 2.745954000  | 3.905578000  | 1.821921000  | H  | -0.629307000 | -1.519297000 | 5.093511000  |
| H  | 3.003147000  | 4.918467000  | 1.543563000  | C  | 0.014621000  | -2.905017000 | 3.496938000  |
| C  | 2.028154000  | 3.485449000  | 2.912010000  | H  | -0.478572000 | -3.846398000 | 3.698440000  |
| H  | 1.589342000  | 4.089375000  | 3.694597000  | C  | 0.886595000  | -2.662529000 | 2.363844000  |
| C  | 1.915752000  | 2.040863000  | 2.822627000  | C  | 1.194547000  | -3.602600000 | 1.391626000  |
| C  | 1.202820000  | 1.219660000  | 3.700501000  | H  | 0.741066000  | -4.584195000 | 1.488477000  |
| H  | 0.711079000  | 1.713728000  | 4.532552000  | C  | 1.991766000  | -3.377832000 | 0.277827000  |
| Fe | -0.632553000 | 0.346100000  | -0.859661000 | C  | 2.252276000  | -4.357587000 | -0.759590000 |
| N  | -1.481536000 | 1.173839000  | 0.847123000  | H  | 1.864554000  | -5.367527000 | -0.758601000 |
| N  | -1.356175000 | -1.533116000 | -0.281771000 | C  | 3.033702000  | -3.744087000 | -1.698340000 |
| N  | 0.143995000  | -0.492380000 | -2.592186000 | H  | 3.417720000  | -4.147132000 | -2.625745000 |
| N  | 0.042008000  | 2.216273000  | -1.446893000 | C  | 3.257797000  | -2.386587000 | -1.239581000 |
| C  | -2.132802000 | 0.488633000  | 1.846744000  | C  | 3.970147000  | -1.425448000 | -1.942044000 |
| C  | -2.488420000 | 1.427347000  | 2.900156000  | H  | 4.398348000  | -1.721895000 | -2.894651000 |
| H  | -3.019440000 | 1.163362000  | 3.804715000  | C  | 4.141922000  | -0.106093000 | -1.550790000 |
| C  | -2.031056000 | 2.659038000  | 2.514286000  | C  | 4.850877000  | 0.895959000  | -2.327137000 |
| H  | -2.116195000 | 3.599323000  | 3.042063000  | H  | 5.333623000  | 0.705955000  | -3.276411000 |
| C  | -1.389971000 | 2.494406000  | 1.218957000  | C  | 4.762054000  | 2.069309000  | -1.634681000 |
| C  | -0.758473000 | 3.503935000  | 0.491443000  | H  | 5.154721000  | 3.042083000  | -1.898277000 |
| H  | -0.769150000 | 4.494863000  | 0.934943000  | C  | 3.999464000  | 1.791036000  | -0.430337000 |
| C  | -0.093900000 | 3.378394000  | -0.729099000 | C  | 3.665170000  | 2.742188000  | 0.522904000  |
| C  | 0.601125000  | 4.446210000  | -1.434723000 | H  | 3.991718000  | 3.761790000  | 0.343255000  |
| H  | 0.651623000  | 5.473452000  | -1.099567000 | C  | 2.908348000  | 2.508736000  | 1.661766000  |
| C  | 1.151336000  | 3.894683000  | -2.560794000 | C  | 2.502735000  | 3.528880000  | 2.607204000  |
| H  | 1.740407000  | 4.383018000  | -3.325611000 | H  | 2.771760000  | 4.573947000  | 2.532196000  |
| C  | 0.799510000  | 2.480780000  | -2.561427000 | C  | 1.725320000  | 2.914661000  | 3.549948000  |
| C  | 1.188671000  | 1.540983000  | -3.518771000 | H  | 1.225973000  | 3.353721000  | 4.403026000  |
| H  | 1.810658000  | 1.907437000  | -4.330024000 | C  | 1.649339000  | 1.513687000  | 3.188216000  |
| C  | 0.897578000  | 0.174450000  | -3.529753000 | C  | 0.909293000  | 0.560148000  | 3.873407000  |
| C  | 1.368690000  | -0.785443000 | -4.517578000 | H  | 0.363167000  | 0.891991000  | 4.750936000  |
| H  | 1.983138000  | -0.536215000 | -5.372368000 | Fe | -0.687539000 | 0.506497000  | -1.012951000 |
| C  | 0.898286000  | -2.016014000 | -4.142427000 | N  | -1.443111000 | 1.240021000  | 0.718604000  |
| H  | 1.053507000  | -2.968829000 | -4.630879000 | N  | -1.409994000 | -1.331340000 | -0.533357000 |
| C  | 0.133914000  | -1.828564000 | -2.917516000 | N  | 0.177022000  | -0.267610000 | -2.661117000 |
| C  | -0.475134000 | -2.843378000 | -2.175183000 | N  | 0.195205000  | 2.287601000  | -1.384223000 |
| H  | -0.381496000 | -3.851164000 | -2.569046000 | C  | -2.160260000 | 0.544395000  | 1.672430000  |
| C  | -1.153492000 | -2.712557000 | -0.960318000 | C  | -2.519492000 | 1.433290000  | 2.755979000  |
| C  | -1.746406000 | -3.798753000 | -0.194582000 | H  | -3.088464000 | 1.135121000  | 3.625450000  |
| H  | -1.737817000 | -4.838663000 | -0.493171000 | C  | -2.005107000 | 2.662743000  | 2.451356000  |
| C  | -2.284070000 | -3.247336000 | 0.939619000  | H  | -2.064151000 | 3.579558000  | 3.020714000  |
| H  | -2.804023000 | -3.748514000 | 1.745059000  | C  | -1.326689000 | 2.535294000  | 1.180317000  |
| C  | -2.026647000 | -1.817362000 | 0.884882000  | C  | -0.627879000 | 3.557283000  | 0.557974000  |
| C  | -2.390365000 | -0.883645000 | 1.857168000  | H  | -0.613844000 | 4.522731000  | 1.051260000  |
| H  | -2.913576000 | -1.269693000 | 2.726475000  | C  | 0.088237000  | 3.432756000  | -0.620975000 |
| O  | 4.434737000  | -0.542469000 | 2.006382000  | C  | 0.876524000  | 4.490829000  | -1.217320000 |
| O  | -2.356010000 | 0.657272000  | -1.823521000 | H  | 0.960604000  | 5.489885000  | -0.812715000 |
| C  | -3.452745000 | 1.229747000  | -1.377783000 | C  | 1.465847000  | 3.969285000  | -2.335021000 |
| C  | -4.578296000 | 0.264871000  | -1.051714000 | H  | 2.134214000  | 4.451805000  | -3.034460000 |
| C  | -4.425510000 | -1.116863000 | -1.238574000 | C  | 1.036000000  | 2.590153000  | -2.434908000 |
| C  | -5.777708000 | 0.771425000  | -0.522208000 | C  | 1.422987000  | 1.714129000  | -3.437178000 |
| C  | -5.458618000 | -1.993679000 | -0.890671000 | H  | 2.111325000  | 2.085697000  | -4.188246000 |
| H  | -3.484431000 | -1.475640000 | -1.632728000 | C  | 1.026473000  | 0.389365000  | -3.533337000 |
| C  | -6.781967000 | -0.124215000 | -0.190557000 | C  | 1.476813000  | -0.526885000 | -4.557108000 |
| H  | -5.872996000 | 1.841014000  | -0.383281000 | H  | 2.152141000  | -0.260655000 | -5.358486000 |
| C  | -6.658911000 | -1.501979000 | -0.357481000 | C  | 0.905628000  | -1.740839000 | -4.289441000 |
| H  | -5.328342000 | -3.063684000 | -1.020880000 | H  | 1.020206000  | -2.673645000 | -4.823978000 |
| H  | -7.468398000 | -2.166508000 | -0.079043000 | C  | 0.104825000  | -1.578868000 | -3.096373000 |
| O  | -3.637789000 | 2.461676000  | -1.207056000 | C  | -0.580113000 | -2.607713000 | -2.467941000 |
| Cl | -8.381410000 | 0.532572000  | 0.521318000  | H  | -0.531190000 | -3.590766000 | -2.923679000 |
| H  | 5.451142000  | -1.646275000 | 3.494356000  | C  | -1.267412000 | -2.492049000 | -1.268851000 |
| C  | 4.500436000  | -1.656444000 | 2.943479000  | C  | -1.920249000 | -3.586374000 | -0.584262000 |
| H  | 3.654542000  | -1.642250000 | 3.638417000  | H  | -1.950404000 | -4.603674000 | -0.949797000 |
| H  | 4.436244000  | -2.556735000 | 2.330308000  | C  | -2.441843000 | -3.079035000 | 0.574392000  |
| H  | 4.194593000  | 0.302737000  | 2.444833000  | H  | -2.993619000 | -3.592536000 | 1.349094000  |
|    |              |              |              | C  | -2.116774000 | -1.671235000 | 0.604863000  |
|    |              |              |              | C  | -2.475545000 | -0.804460000 | 1.624341000  |
|    |              |              |              | H  | -3.032674000 | -1.217232000 | 2.457588000  |
|    |              |              |              | O  | 4.231223000  | -0.881025000 | 2.158616000  |
|    |              |              |              | O  | -2.421831000 | 1.051206000  | -1.984377000 |
|    |              |              |              | C  | -3.534580000 | 1.510702000  | -1.455847000 |
|    |              |              |              | C  | -4.568702000 | 0.450717000  | -1.125994000 |
|    |              |              |              | C  | -4.395246000 | -0.882368000 | -1.524387000 |
|    |              |              |              | C  | -5.702872000 | 0.816485000  | -0.380978000 |
| Fe | 2.458314000  | -0.439675000 | 0.963063000  |    |              |              |              |
| N  | 1.028753000  | -0.005029000 | 0.064311000  |    |              |              |              |
| N  | 1.346834000  | -1.356910000 | 2.389221000  |    |              |              |              |
| N  | 2.394347000  | 1.278453000  | 2.042082000  |    |              |              |              |
| N  | 3.639584000  | 0.457644000  | -0.393947000 |    |              |              |              |
| N  | 2.628491000  | -2.186523000 | -0.023945000 |    |              |              |              |

**4-<sup>6</sup>P** (is, is)

|    |              |              |              |
|----|--------------|--------------|--------------|
| C  | -5.339217000 | -1.852827000 | -1.172446000 |
| H  | -3.503458000 | -1.136661000 | -2.081395000 |
| C  | -6.617303000 | -0.169409000 | -0.045804000 |
| H  | -5.819665000 | 1.852136000  | -0.087471000 |
| C  | -6.469163000 | -1.503579000 | -0.419137000 |
| H  | -5.188821000 | -2.887030000 | -1.465402000 |
| H  | -7.206705000 | -2.243074000 | -0.130107000 |
| O  | -3.787717000 | 2.714293000  | -1.188635000 |
| Cl | -8.121488000 | 0.297162000  | 0.960292000  |
| H  | 5.255154000  | -2.334668000 | 3.294352000  |
| C  | 4.303590000  | -2.211834000 | 2.761654000  |
| H  | 3.452588000  | -2.382019000 | 3.428529000  |
| H  | 4.242046000  | -2.904461000 | 1.923157000  |
| H  | 4.121252000  | -0.178216000 | 2.831847000  |

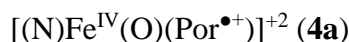

<sup>6</sup>4a<sub>(hs)</sub> or 4a-<sup>6</sup>R<sub>(hs)</sub>

|    |              |              |              |
|----|--------------|--------------|--------------|
| Fe | 0.000009000  | -0.000016000 | 0.228963000  |
| N  | 2.110513000  | -0.003388000 | 0.012807000  |
| N  | 0.003463000  | 2.073567000  | -0.007614000 |
| N  | -0.003516000 | -2.073560000 | -0.007891000 |
| N  | -2.110518000 | 0.003465000  | 0.012952000  |
| C  | 2.907798000  | -1.109683000 | -0.030368000 |
| C  | -1.105595000 | 2.872950000  | -0.046046000 |
| C  | 2.911458000  | 1.100217000  | -0.030480000 |
| C  | 1.115066000  | 2.869340000  | -0.046176000 |
| C  | 1.105560000  | -2.872897000 | -0.046212000 |
| C  | -2.907836000 | 1.109747000  | -0.030323000 |
| C  | -1.115099000 | -2.869327000 | -0.046307000 |
| C  | -2.911430000 | -1.100148000 | -0.030433000 |
| C  | 4.281723000  | -0.700684000 | -0.088598000 |
| C  | -0.674605000 | 4.264611000  | -0.112878000 |
| C  | 4.284056000  | 0.686639000  | -0.088686000 |
| C  | 0.688633000  | 4.262398000  | -0.112925000 |
| C  | 0.674585000  | -4.264598000 | -0.112855000 |
| C  | -4.281741000 | 0.700713000  | -0.088762000 |
| C  | -0.688642000 | -4.262413000 | -0.112838000 |
| C  | -4.284039000 | -0.686609000 | -0.088743000 |
| H  | 5.134509000  | -1.373070000 | -0.130729000 |
| H  | -1.345628000 | 5.118071000  | -0.161042000 |
| H  | 5.139087000  | 1.356169000  | -0.130747000 |
| H  | 1.362436000  | 5.113664000  | -0.161190000 |
| H  | 1.345631000  | -5.118045000 | -0.160934000 |
| H  | -5.134535000 | 1.373081000  | -0.131014000 |
| H  | -1.362440000 | -5.113691000 | -0.160969000 |
| H  | -5.139042000 | -1.356168000 | -0.130921000 |
| C  | 2.429248000  | -2.446818000 | -0.037672000 |
| C  | -2.429294000 | 2.446874000  | -0.037579000 |
| C  | -2.437395000 | -2.438934000 | -0.037620000 |
| C  | 2.437381000  | 2.438974000  | -0.037606000 |
| H  | 3.188719000  | -3.227535000 | -0.075843000 |
| H  | -3.188756000 | 3.227596000  | -0.075871000 |
| H  | -3.199507000 | -3.217052000 | -0.076013000 |
| H  | 3.199448000  | 3.217133000  | -0.076087000 |
| O  | -0.000008000 | -0.000317000 | 1.915797000  |
| N  | 0.000190000  | 0.000015000  | -1.757313000 |

<sup>4</sup>4a<sub>(hs)</sub> or 4a-<sup>4</sup>R<sub>(hs)</sub>

|    |              |              |              |
|----|--------------|--------------|--------------|
| Fe | 0.000704000  | -0.000053000 | -0.019021000 |
| N  | 2.110751000  | 0.019030000  | 0.048060000  |
| N  | -0.019387000 | 2.092891000  | -0.038781000 |
| N  | 0.018572000  | -2.092902000 | -0.038262000 |
| N  | -2.110644000 | -0.018894000 | 0.047901000  |
| C  | 2.918503000  | -1.080716000 | 0.014415000  |
| C  | -1.138674000 | 2.876469000  | -0.031760000 |
| C  | 2.898640000  | 1.133183000  | 0.014383000  |
| C  | 1.085951000  | 2.896268000  | -0.031921000 |
| C  | 1.138050000  | -2.876329000 | -0.031536000 |
| C  | -2.918628000 | 1.080710000  | 0.014279000  |
| C  | -1.086591000 | -2.896420000 | -0.031732000 |

|   |              |              |              |
|---|--------------|--------------|--------------|
| C | -2.898679000 | -1.133016000 | 0.014419000  |
| C | 4.288406000  | -0.655536000 | -0.021429000 |
| C | -0.720886000 | 4.275012000  | -0.040260000 |
| C | 4.275902000  | 0.732834000  | -0.021393000 |
| C | 0.643219000  | 4.287127000  | -0.040357000 |
| C | 0.720406000  | -4.274909000 | -0.040334000 |
| C | -4.288547000 | 0.655543000  | -0.021292000 |
| C | -0.643707000 | -4.287200000 | -0.040475000 |
| C | -4.275983000 | -0.732773000 | -0.021277000 |
| H | 5.150077000  | -1.317583000 | -0.047266000 |
| H | -1.398784000 | 5.124617000  | -0.039699000 |
| H | 5.125513000  | 1.410306000  | -0.047258000 |
| H | 1.305881000  | 5.148659000  | -0.039867000 |
| H | 1.398388000  | -5.124449000 | -0.040031000 |
| H | -5.150200000 | 1.317619000  | -0.047095000 |
| H | -1.306243000 | -5.148830000 | -0.040269000 |
| H | -5.125520000 | -1.410342000 | -0.047067000 |
| C | 2.454773000  | -2.426197000 | -0.003454000 |
| C | -2.455317000 | 2.426296000  | -0.003608000 |
| C | -2.411067000 | -2.469920000 | -0.003655000 |
| C | 2.410545000  | 2.469962000  | -0.003697000 |
| H | 3.227260000  | -3.195229000 | -0.012459000 |
| H | -3.227956000 | 3.195174000  | -0.012431000 |
| H | -3.169678000 | -3.252659000 | -0.012577000 |
| H | 3.168915000  | 3.252938000  | -0.012453000 |
| O | 0.000713000  | 0.000210000  | 1.847058000  |
| N | 0.000774000  | -0.000530000 | -1.718823000 |

<sup>4</sup>4a<sub>(is)</sub> or 4a-<sup>4</sup>R<sub>(is)</sub>

|    |              |              |              |
|----|--------------|--------------|--------------|
| Fe | -0.000023000 | 0.000021000  | 0.032132000  |
| N  | 1.417590000  | 1.465908000  | -0.014633000 |
| N  | -1.483146000 | 1.418023000  | 0.001787000  |
| N  | 1.483105000  | -1.418051000 | 0.001092000  |
| N  | -1.417645000 | -1.465863000 | -0.013882000 |
| C  | 2.780997000  | 1.289645000  | -0.031801000 |
| C  | -2.838881000 | 1.194656000  | -0.019903000 |
| C  | 1.184087000  | 2.811318000  | -0.008473000 |
| C  | -1.307035000 | 2.772009000  | 0.000047000  |
| C  | 2.838828000  | -1.194654000 | -0.020391000 |
| C  | -2.781059000 | -1.289631000 | -0.031540000 |
| C  | 1.307014000  | -2.772028000 | -0.000074000 |
| C  | -1.184113000 | -2.811278000 | -0.008150000 |
| C  | 3.437026000  | 2.582436000  | -0.039622000 |
| C  | -3.541235000 | 2.438348000  | -0.029481000 |
| C  | 2.452907000  | 3.524570000  | -0.024102000 |
| C  | -2.579761000 | 3.433137000  | -0.016799000 |
| C  | 3.541210000  | -2.438343000 | -0.029377000 |
| C  | -3.437054000 | -2.582434000 | -0.039830000 |
| C  | 2.579754000  | -3.433144000 | -0.016636000 |
| C  | -2.452918000 | -3.524548000 | -0.024268000 |
| H  | 4.514094000  | 2.725153000  | -0.053964000 |
| H  | -4.622936000 | 2.539804000  | -0.044169000 |
| H  | 2.548427000  | 4.606775000  | -0.023970000 |
| H  | -2.717704000 | 4.510711000  | -0.020954000 |
| H  | 4.622910000  | -2.539792000 | -0.044210000 |
| H  | -4.514116000 | -2.725172000 | -0.054465000 |
| H  | 2.717720000  | -4.510716000 | -0.020552000 |
| H  | -2.548411000 | -4.606755000 | -0.024406000 |
| C  | 3.441208000  | 0.076636000  | -0.033961000 |
| C  | -3.441277000 | -0.076630000 | -0.033639000 |
| C  | 0.057070000  | -3.429470000 | 0.007037000  |
| C  | -0.057107000 | 3.429482000  | 0.006931000  |
| H  | 4.530310000  | 0.103691000  | -0.048497000 |
| H  | -4.530373000 | -0.103675000 | -0.048600000 |
| H  | 0.072599000  | -4.518244000 | 0.006151000  |
| H  | -0.072676000 | 4.518256000  | 0.006103000  |
| O  | 0.000949000  | -0.000009000 | 1.799774000  |
| N  | -0.000589000 | -0.000157000 | -1.759776000 |

<sup>2</sup>4a<sub>(is)</sub> or 4a-<sup>2</sup>R<sub>(is)</sub>

|    |              |             |              |
|----|--------------|-------------|--------------|
| Fe | -0.000663000 | 0.000053000 | 0.064736000  |
| N  | -0.001092000 | 2.036242000 | -0.017196000 |

|   |              |              |              |
|---|--------------|--------------|--------------|
| N | -2.055348000 | -0.001389000 | -0.009242000 |
| N | 2.055332000  | 0.001460000  | -0.008851000 |
| N | 0.001645000  | -2.036261000 | -0.017482000 |
| C | 1.101539000  | 2.849847000  | -0.021258000 |
| C | -2.870884000 | -1.100992000 | -0.015982000 |
| C | -1.105053000 | 2.848163000  | -0.020316000 |
| C | -2.872514000 | 1.096933000  | -0.015161000 |
| C | 2.871041000  | 1.100943000  | -0.015865000 |
| C | -1.101043000 | -2.849827000 | -0.021296000 |
| C | 2.872617000  | -1.096811000 | -0.014897000 |
| C | 1.105532000  | -2.848182000 | -0.020475000 |
| C | 0.677339000  | 4.241329000  | -0.030076000 |
| C | -4.241442000 | -0.695940000 | -0.022662000 |
| C | -0.683107000 | 4.240273000  | -0.029403000 |
| C | -4.242499000 | 0.689877000  | -0.022134000 |
| C | 4.241622000  | 0.695934000  | -0.022732000 |
| C | -0.676891000 | -4.241331000 | -0.030001000 |
| C | 4.242637000  | -0.689846000 | -0.022096000 |
| C | 0.683551000  | -4.240290000 | -0.029435000 |
| H | 1.356308000  | 5.089506000  | -0.037020000 |
| H | -5.089315000 | -1.375329000 | -0.028527000 |
| H | -1.363499000 | 5.087315000  | -0.035719000 |
| H | -5.091442000 | 1.367899000  | -0.027525000 |
| H | 5.089481000  | 1.375340000  | -0.028788000 |
| H | -1.355855000 | -5.089514000 | -0.036860000 |
| H | 5.091538000  | -1.367922000 | -0.027641000 |
| H | 1.363940000  | -5.087335000 | -0.035747000 |
| C | 2.420523000  | 2.439190000  | -0.018871000 |
| C | -2.420086000 | -2.439181000 | -0.018889000 |
| C | 2.423900000  | -2.435682000 | -0.017410000 |
| C | -2.423503000 | 2.435740000  | -0.017473000 |
| H | 3.184529000  | 3.215440000  | -0.024741000 |
| H | -3.183997000 | -3.215528000 | -0.024552000 |
| H | 3.189086000  | -3.210776000 | -0.022462000 |
| H | -3.188563000 | 3.210961000  | -0.022517000 |
| O | -0.000775000 | -0.000264000 | 1.757777000  |
| N | -0.000311000 | -0.000081000 | -1.780753000 |

**<sup>2</sup>4a<sub>(ts)</sub> or 4a-<sup>2</sup>R<sub>(ts)</sub>**

|    |              |              |              |
|----|--------------|--------------|--------------|
| Fe | -0.000218000 | -0.001565000 | 0.027737000  |
| N  | -2.037592000 | 0.065808000  | -0.028449000 |
| N  | -0.065461000 | -2.050761000 | 0.008579000  |
| N  | 0.065397000  | 2.050556000  | 0.008382000  |
| N  | 2.037823000  | -0.064129000 | -0.028554000 |
| C  | -2.814650000 | 1.194068000  | -0.026681000 |
| C  | 1.006960000  | -2.903185000 | -0.002715000 |
| C  | -2.884519000 | -1.011107000 | -0.027312000 |
| C  | -1.189589000 | -2.833282000 | -0.003438000 |
| C  | -1.006728000 | 2.903459000  | -0.002676000 |
| C  | 2.814633000  | -1.192706000 | -0.026510000 |
| C  | 1.189463000  | 2.833409000  | -0.003531000 |
| C  | 2.884885000  | 1.012418000  | -0.027569000 |
| C  | -4.218787000 | 0.815681000  | -0.034737000 |
| C  | 0.557446000  | -4.260302000 | -0.012603000 |
| C  | -4.261947000 | -0.544637000 | -0.035154000 |
| C  | -0.827219000 | -4.216302000 | -0.013138000 |
| C  | -0.557271000 | 4.260598000  | -0.012354000 |
| C  | 4.218872000  | -0.814592000 | -0.034584000 |
| C  | 0.827263000  | 4.216495000  | -0.012979000 |
| C  | 4.262257000  | 0.545729000  | -0.035208000 |
| H  | -5.044987000 | 1.521298000  | -0.037464000 |
| H  | 1.209132000  | -5.129580000 | -0.020867000 |
| H  | -5.130952000 | -1.196822000 | -0.038253000 |
| H  | -1.532476000 | -5.042685000 | -0.021907000 |
| H  | -1.209048000 | 5.129811000  | -0.020405000 |
| H  | 5.044988000  | -1.520312000 | -0.037039000 |
| H  | 1.532727000  | 5.042710000  | -0.021637000 |
| H  | 5.131347000  | 1.197798000  | -0.038212000 |
| C  | -2.359397000 | 2.498567000  | -0.012384000 |
| C  | 2.359443000  | -2.497362000 | -0.012251000 |
| C  | 2.513661000  | 2.343380000  | -0.013800000 |
| C  | -2.513555000 | -2.342238000 | -0.013522000 |
| H  | -3.109190000 | 3.288610000  | -0.016486000 |
| H  | 3.109590000  | -3.287086000 | -0.016362000 |

|   |              |              |              |
|---|--------------|--------------|--------------|
| H | 3.312130000  | 3.084160000  | -0.018584000 |
| H | -3.312435000 | -3.082592000 | -0.018243000 |
| O | -0.000130000 | -0.001319000 | 1.823189000  |
| N | -0.000375000 | -0.001846000 | -1.791721000 |

**4a-<sup>6</sup>ts<sub>1</sub>(<sub>hs</sub>)**

|    |              |              |              |
|----|--------------|--------------|--------------|
| Fe | 0.097615000  | -0.000002000 | -0.020399000 |
| N  | 0.105864000  | 2.069317000  | -0.171355000 |
| N  | -1.998198000 | -0.000035000 | -0.254222000 |
| N  | 2.214093000  | 0.000040000  | 0.053855000  |
| N  | 0.105938000  | -2.069316000 | -0.171374000 |
| C  | 1.217312000  | 2.867357000  | -0.119517000 |
| C  | -2.794398000 | -1.104195000 | -0.339061000 |
| C  | -0.997745000 | 2.871216000  | -0.268352000 |
| C  | -2.794445000 | 1.104093000  | -0.339013000 |
| C  | 3.011907000  | 1.102773000  | 0.056335000  |
| C  | -0.997636000 | -2.871258000 | -0.268396000 |
| C  | 3.011946000  | -1.102664000 | 0.056365000  |
| C  | 1.217415000  | -2.867313000 | -0.119478000 |
| C  | 0.795935000  | 4.260734000  | -0.203962000 |
| C  | -4.166715000 | -0.691880000 | -0.457644000 |
| C  | -0.564719000 | 4.263688000  | -0.294192000 |
| C  | -4.166744000 | 0.691727000  | -0.457611000 |
| C  | 4.392088000  | 0.691283000  | 0.089368000  |
| C  | -0.564557000 | -4.263713000 | -0.294201000 |
| C  | 4.392114000  | -0.691123000 | 0.089387000  |
| C  | 0.796094000  | -4.260706000 | -0.203915000 |
| H  | 1.470013000  | 5.113123000  | -0.192264000 |
| H  | -5.018435000 | -1.362110000 | -0.536893000 |
| H  | -1.230992000 | 5.118586000  | -0.373116000 |
| H  | -5.018493000 | 1.361923000  | -0.536828000 |
| H  | 5.247222000  | 1.361972000  | 0.103082000  |
| H  | -1.230794000 | -5.118639000 | -0.373135000 |
| H  | 5.247272000  | -1.361780000 | 0.103119000  |
| H  | 1.470205000  | -5.113069000 | -0.192172000 |
| C  | 2.535711000  | 2.436832000  | -0.000541000 |
| C  | -2.320632000 | -2.440289000 | -0.323908000 |
| C  | 2.535796000  | -2.436738000 | -0.000481000 |
| C  | -2.320726000 | 2.440203000  | -0.323830000 |
| H  | 3.295959000  | 3.217908000  | 0.018059000  |
| H  | -3.079761000 | -3.218942000 | -0.397096000 |
| H  | 3.296071000  | -3.217788000 | 0.018148000  |
| H  | -3.079884000 | 3.218831000  | -0.396989000 |
| O  | 0.067482000  | -0.000027000 | 1.844053000  |
| H  | -0.948477000 | -0.000055000 | 2.254128000  |
| H  | -2.743333000 | -0.912181000 | 2.409260000  |
| H  | -2.156507000 | -0.000054000 | 3.899810000  |
| H  | -2.743232000 | 0.912254000  | 2.409336000  |
| C  | -2.308833000 | -0.000004000 | 2.816544000  |
| N  | 0.242347000  | 0.000016000  | -1.885747000 |

**4a-<sup>4</sup>ts<sub>1</sub>(<sub>hs</sub>)**

|    |              |              |              |
|----|--------------|--------------|--------------|
| Fe | 0.110822000  | 0.002783000  | -0.153623000 |
| N  | 0.823816000  | 1.964227000  | -0.124278000 |
| N  | -1.874835000 | 0.742132000  | -0.236419000 |
| N  | 2.074798000  | -0.738221000 | 0.004268000  |
| N  | -0.627716000 | -1.952964000 | -0.193589000 |
| C  | 2.146538000  | 2.316268000  | -0.066711000 |
| C  | -3.005629000 | -0.016260000 | -0.366091000 |
| C  | 0.064577000  | 3.095694000  | -0.133091000 |
| C  | -2.237554000 | 2.055177000  | -0.237816000 |
| C  | 3.209039000  | 0.023619000  | 0.026861000  |
| C  | -1.945014000 | -2.309180000 | -0.312224000 |
| C  | 2.434950000  | -2.049712000 | 0.026420000  |
| C  | 0.132349000  | -3.084074000 | -0.129002000 |
| C  | 2.234202000  | 3.770048000  | -0.055417000 |
| C  | -4.146349000 | 0.847532000  | -0.431921000 |
| C  | 0.957305000  | 4.250985000  | -0.092777000 |
| C  | -3.667938000 | 2.147748000  | -0.348064000 |
| C  | 4.352632000  | -0.841363000 | 0.077297000  |
| C  | -2.029399000 | -3.763671000 | -0.323166000 |
| C  | 3.869541000  | -2.141482000 | 0.077815000  |

|   |              |              |              |
|---|--------------|--------------|--------------|
| C | -0.755839000 | -4.240514000 | -0.209331000 |
| H | 3.161978000  | 4.334724000  | -0.013833000 |
| H | -5.178101000 | 0.518005000  | -0.522272000 |
| H | 0.630558000  | 5.287501000  | -0.091375000 |
| H | -4.236597000 | 3.073603000  | -0.371306000 |
| H | 5.387796000  | -0.511539000 | 0.111958000  |
| H | -2.952936000 | -4.330814000 | -0.405016000 |
| H | 4.438455000  | -3.067075000 | 0.108215000  |
| H | -0.427944000 | -5.276271000 | -0.180358000 |
| C | 3.227145000  | 1.442571000  | -0.001959000 |
| C | -3.024515000 | -1.435991000 | -0.395100000 |
| C | 1.521028000  | -3.140284000 | -0.016077000 |
| C | -1.328586000 | 3.148776000  | -0.168655000 |
| H | 4.213961000  | 1.904707000  | 0.035715000  |
| H | -4.008634000 | -1.896101000 | -0.485803000 |
| H | 1.962696000  | -4.136073000 | 0.015292000  |
| H | -1.775227000 | 4.142754000  | -0.175069000 |
| O | 0.121067000  | 0.000573000  | 1.768360000  |
| H | -0.926611000 | 0.002995000  | 2.211052000  |
| H | -2.591331000 | -0.992847000 | 2.306112000  |
| H | -2.064999000 | -0.088767000 | 3.815304000  |
| H | -2.695287000 | 0.823749000  | 2.348869000  |
| C | -2.195246000 | -0.068506000 | 2.727660000  |
| N | 0.222925000  | -0.002285000 | -1.843136000 |

**4a-<sup>4</sup>ts1<sub>(is)</sub>**

|    |              |              |              |
|----|--------------|--------------|--------------|
| Fe | -0.097628000 | 0.003565000  | -0.072724000 |
| N  | 0.245936000  | -1.974155000 | -0.210491000 |
| N  | 1.906477000  | 0.358080000  | -0.245903000 |
| N  | -2.119030000 | -0.353103000 | 0.032084000  |
| N  | -0.457060000 | 1.982075000  | -0.161870000 |
| C  | -0.694567000 | -2.972260000 | -0.144125000 |
| C  | 2.522343000  | 1.579868000  | -0.264429000 |
| C  | 1.467276000  | -2.594341000 | -0.327399000 |
| C  | 2.903877000  | -0.575751000 | -0.348552000 |
| C  | -2.730843000 | -1.572118000 | 0.074419000  |
| C  | 0.479048000  | 2.983010000  | -0.211029000 |
| C  | -3.117318000 | 0.581044000  | 0.065071000  |
| C  | -1.686246000 | 2.597750000  | -0.115879000 |
| C  | -0.045829000 | -4.268911000 | -0.246479000 |
| C  | 3.944246000  | 1.421566000  | -0.353639000 |
| C  | 1.289065000  | -4.034935000 | -0.360894000 |
| C  | 4.182503000  | 0.062897000  | -0.409832000 |
| C  | -4.155809000 | -1.415445000 | 0.157234000  |
| C  | -0.180559000 | 4.278278000  | -0.224247000 |
| C  | -4.398357000 | -0.057808000 | 0.149864000  |
| C  | -1.518405000 | 4.038463000  | -0.168965000 |
| H  | -0.571347000 | -5.219450000 | -0.227074000 |
| H  | 4.659179000  | 2.238820000  | -0.381157000 |
| H  | 2.100346000  | -4.751152000 | -0.455725000 |
| H  | 5.133038000  | -0.457650000 | -0.483619000 |
| H  | -4.869010000 | -2.233459000 | 0.205956000  |
| H  | 0.339741000  | 5.230771000  | -0.269452000 |
| H  | -5.350720000 | 0.463146000  | 0.194313000  |
| H  | -2.337730000 | 4.751734000  | -0.155083000 |
| C  | -2.057887000 | -2.805702000 | 0.008879000  |
| C  | 1.851232000  | 2.815416000  | -0.230364000 |
| C  | -2.910322000 | 1.968895000  | -0.002166000 |
| C  | 2.695378000  | -1.965415000 | -0.381889000 |
| H  | -2.668593000 | -3.706766000 | 0.046546000  |
| H  | 2.464842000  | 3.714587000  | -0.260840000 |
| H  | -3.794839000 | 2.604065000  | 0.028658000  |
| H  | 3.578034000  | -2.597754000 | -0.467021000 |
| O  | -0.084974000 | -0.008465000 | 1.800256000  |
| H  | 0.928272000  | -0.029733000 | 2.222625000  |
| H  | 2.762906000  | 0.811581000  | 2.340736000  |
| H  | 2.127605000  | 0.001309000  | 3.868533000  |
| H  | 2.663786000  | -1.008320000 | 2.426056000  |
| C  | 2.276017000  | -0.055454000 | 2.785876000  |
| N  | -0.238673000 | 0.002674000  | -1.964306000 |

**4a-<sup>2</sup>ts1<sub>(is)</sub>**

|    |              |              |              |
|----|--------------|--------------|--------------|
| Fe | 0.108624000  | 0.019812000  | -0.173920000 |
| N  | -0.984006000 | 1.839449000  | -0.267310000 |
| N  | -1.663168000 | -1.046746000 | -0.367451000 |
| N  | 1.889798000  | 1.082894000  | -0.024436000 |
| N  | 1.213356000  | -1.798827000 | -0.164129000 |
| C  | -0.446342000 | 3.085369000  | -0.161213000 |
| C  | -1.773188000 | -2.406761000 | -0.313387000 |
| C  | -2.331958000 | 1.953119000  | -0.323080000 |
| C  | -2.911871000 | -0.510900000 | -0.389377000 |
| C  | 1.995744000  | 2.443611000  | 0.023312000  |
| C  | 0.671764000  | -3.045973000 | -0.169780000 |
| C  | 3.138207000  | 0.547681000  | 0.062863000  |
| C  | 2.558168000  | -1.912183000 | -0.036333000 |
| C  | -1.513330000 | 4.061992000  | -0.164475000 |
| C  | -3.183634000 | -2.763655000 | -0.320595000 |
| C  | -2.692909000 | 3.356072000  | -0.264009000 |
| C  | -3.888915000 | -1.593420000 | -0.367094000 |
| C  | 3.400610000  | 2.800775000  | 0.162968000  |
| C  | 1.732168000  | -4.023531000 | -0.051659000 |
| C  | 4.108026000  | 1.631752000  | 0.187464000  |
| C  | 2.912164000  | -3.317611000 | 0.029914000  |
| H  | -1.382822000 | 5.138730000  | -0.090970000 |
| H  | -3.571006000 | -3.778340000 | -0.281575000 |
| H  | -3.706511000 | 3.747953000  | -0.285993000 |
| H  | -4.967264000 | -1.460107000 | -0.369334000 |
| H  | 3.782361000  | 3.816046000  | 0.234827000  |
| H  | 1.595627000  | -5.101823000 | -0.027229000 |
| H  | 5.182629000  | 1.500147000  | 0.283689000  |
| H  | 3.920308000  | -3.710033000 | 0.135892000  |
| C  | 0.935021000  | 3.353940000  | -0.046449000 |
| C  | -0.712422000 | -3.316923000 | -0.246007000 |
| C  | 3.451982000  | -0.818410000 | 0.041017000  |
| C  | -3.224739000 | 0.856345000  | -0.394198000 |
| H  | 1.210286000  | 4.407386000  | 0.018859000  |
| H  | -0.993408000 | -4.370368000 | -0.218408000 |
| H  | 4.509256000  | -1.068139000 | 0.133276000  |
| H  | -4.286450000 | 1.102593000  | -0.405652000 |
| O  | 0.008466000  | 0.004266000  | 1.642292000  |
| H  | -0.982101000 | -0.160117000 | 2.102592000  |
| H  | -2.734078000 | -1.268689000 | 2.317504000  |
| H  | -2.027926000 | -0.615140000 | 3.875182000  |
| H  | -2.890609000 | 0.500977000  | 2.713817000  |
| C  | -2.297622000 | -0.409745000 | 2.832402000  |
| N  | 0.242334000  | 0.057577000  | -1.934762000 |

**4a-<sup>2</sup>ts1<sub>(is)</sub>**

|    |              |              |              |
|----|--------------|--------------|--------------|
| Fe | 0.105409000  | 0.005055000  | -0.176481000 |
| N  | 1.984163000  | 0.746575000  | -0.028002000 |
| N  | -0.639053000 | 1.884079000  | -0.198556000 |
| N  | 0.849181000  | -1.882406000 | -0.118075000 |
| N  | -1.771661000 | -0.739669000 | -0.286171000 |
| C  | 3.146576000  | 0.031886000  | 0.015700000  |
| C  | -1.950119000 | 2.246043000  | -0.318362000 |
| C  | 2.341221000  | 2.062954000  | 0.034165000  |
| C  | 0.071980000  | 3.046839000  | -0.106772000 |
| C  | 2.164248000  | -2.242401000 | -0.059948000 |
| C  | -2.930956000 | -0.027145000 | -0.401551000 |
| C  | 0.133435000  | -3.044979000 | -0.118271000 |
| C  | -2.134434000 | -2.057235000 | -0.255815000 |
| C  | 4.285524000  | 0.924210000  | 0.108058000  |
| C  | -2.080533000 | 3.689560000  | -0.299894000 |
| C  | 3.782049000  | 2.192595000  | 0.122547000  |
| C  | -0.817978000 | 4.189363000  | -0.164673000 |
| C  | 2.292623000  | -3.686135000 | -0.029458000 |
| C  | -4.070626000 | -0.918797000 | -0.444914000 |
| C  | 1.023730000  | -4.187613000 | -0.061043000 |
| C  | -3.574221000 | -2.186688000 | -0.347828000 |
| H  | 5.321508000  | 0.601582000  | 0.160052000  |
| H  | -3.021632000 | 4.226728000  | -0.374915000 |
| H  | 4.315688000  | 3.136644000  | 0.185809000  |
| H  | -0.497872000 | 5.225912000  | -0.109055000 |
| H  | 3.235910000  | -4.222661000 | 0.019786000  |
| H  | -5.104750000 | -0.596547000 | -0.523926000 |
| H  | 0.700041000  | -5.224502000 | -0.049305000 |

|   |              |              |              |
|---|--------------|--------------|--------------|
| H | -4.112151000 | -3.130209000 | -0.340682000 |
| C | 3.238711000  | -1.357213000 | -0.013823000 |
| C | -3.019765000 | 1.361857000  | -0.433590000 |
| C | -1.255019000 | -3.132568000 | -0.168168000 |
| C | 1.456199000  | 3.137179000  | 0.009741000  |
| H | 4.237473000  | -1.789820000 | 0.032374000  |
| H | -4.015838000 | 1.794318000  | -0.517645000 |
| H | -1.691075000 | -4.130759000 | -0.155570000 |
| H | 1.885511000  | 4.136630000  | 0.070118000  |
| O | 0.088830000  | -0.029482000 | 1.803416000  |
| H | -0.891647000 | -0.253754000 | 2.218448000  |
| H | -2.553141000 | 0.963736000  | 2.408446000  |
| H | -2.857941000 | -0.828894000 | 2.366441000  |
| H | -2.151354000 | -0.056361000 | 3.871929000  |
| C | -2.255415000 | -0.016231000 | 2.781191000  |
| N | 0.244032000  | 0.005638000  | -1.967035000 |

$[(\text{NH})\text{Fe}^{\text{IV}}(\text{O})(\text{Por}^{\bullet+})]^+$  (**4b**)

${}^6\mathbf{4b}_{(\text{hs})}$  Or  $\mathbf{4b-}{}^6\mathbf{R}_{(\text{hs})}$

|    |              |              |              |
|----|--------------|--------------|--------------|
| Fe | 0.000010000  | 0.007358000  | -0.162646000 |
| N  | 1.470843000  | -1.470596000 | 0.007144000  |
| N  | -1.480111000 | -1.461310000 | 0.006467000  |
| N  | 1.481645000  | 1.473405000  | -0.019632000 |
| N  | -1.472334000 | 1.482737000  | -0.020387000 |
| C  | 2.814148000  | -1.258798000 | 0.018244000  |
| C  | -2.822039000 | -1.240960000 | 0.017836000  |
| C  | 1.249056000  | -2.813414000 | 0.017119000  |
| C  | -1.266864000 | -2.805512000 | 0.016898000  |
| C  | 2.822067000  | 1.254674000  | 0.013596000  |
| C  | -2.814110000 | 1.272502000  | 0.013260000  |
| C  | 1.266267000  | 2.814026000  | 0.014599000  |
| C  | -1.248450000 | 2.821951000  | 0.014414000  |
| C  | 3.495783000  | -2.541942000 | 0.036425000  |
| C  | -3.511792000 | -2.519749000 | 0.036438000  |
| C  | 2.526990000  | -3.504329000 | 0.035716000  |
| C  | -2.549155000 | -3.488295000 | 0.035862000  |
| C  | 3.511946000  | 2.534271000  | 0.058708000  |
| C  | -3.495861000 | 2.556424000  | 0.059074000  |
| C  | 2.547925000  | 3.500135000  | 0.059587000  |
| C  | -2.525720000 | 3.516141000  | 0.059990000  |
| H  | 4.572231000  | -2.673552000 | 0.049450000  |
| H  | -4.589061000 | -2.644473000 | 0.049629000  |
| H  | 2.650887000  | -4.581703000 | 0.048295000  |
| H  | -2.679934000 | -4.564847000 | 0.048777000  |
| H  | 4.588712000  | 2.659664000  | 0.091972000  |
| H  | -4.571793000 | 2.688656000  | 0.092741000  |
| H  | 2.675769000  | 4.576593000  | 0.093662000  |
| H  | -2.646677000 | 4.593383000  | 0.094559000  |
| C  | 3.437961000  | -0.003561000 | 0.020478000  |
| C  | -3.437927000 | 0.018154000  | 0.020075000  |
| C  | 0.010845000  | 3.436291000  | 0.021049000  |
| C  | -0.010842000 | -3.427878000 | 0.022268000  |
| H  | 4.525631000  | -0.007523000 | 0.041653000  |
| H  | -4.525594000 | 0.021022000  | 0.041522000  |
| H  | 0.014251000  | 4.523770000  | 0.052005000  |
| H  | -0.014231000 | -4.515668000 | 0.035208000  |
| O  | 0.000539000  | -0.023067000 | -1.842553000 |
| N  | -0.000526000 | 0.004561000  | 1.828339000  |
| H  | -0.002757000 | -1.004448000 | 2.066412000  |

${}^4\mathbf{4b}_{(\text{hs})}$  Or  $\mathbf{4b-}{}^4\mathbf{R}_{(\text{hs})}$

|    |              |              |              |
|----|--------------|--------------|--------------|
| Fe | 0.008284000  | 0.002775000  | -0.016987000 |
| N  | -1.734071000 | 1.155664000  | 0.002141000  |
| N  | 1.162479000  | 1.742312000  | -0.023847000 |
| N  | -1.144734000 | -1.739993000 | -0.002101000 |
| N  | 1.749938000  | -1.152669000 | -0.022113000 |
| C  | -3.006729000 | 0.674973000  | -0.010654000 |
| C  | 2.519410000  | 1.795351000  | -0.011975000 |
| C  | -1.786431000 | 2.513940000  | 0.008559000  |
| C  | 0.682328000  | 3.013477000  | 0.003500000  |

|   |              |              |              |
|---|--------------|--------------|--------------|
| C | -2.504271000 | -1.794154000 | -0.013037000 |
| C | 3.020031000  | -0.671926000 | -0.010539000 |
| C | -0.663442000 | -3.011280000 | 0.005985000  |
| C | 1.804375000  | -2.510200000 | 0.005253000  |
| C | -3.933862000 | 1.794367000  | -0.008331000 |
| C | 2.939023000  | 3.188146000  | 0.016086000  |
| C | -3.178656000 | 2.932564000  | 0.003507000  |
| C | 1.801469000  | 3.942672000  | 0.025349000  |
| C | -2.921239000 | -3.186575000 | -0.009892000 |
| C | 3.950197000  | -1.790247000 | 0.018192000  |
| C | -1.781889000 | -3.939876000 | 0.001896000  |
| C | 3.197486000  | -2.928965000 | 0.027815000  |
| H | -5.014975000 | 1.707294000  | -0.017057000 |
| H | 3.969000000  | 3.527965000  | 0.029112000  |
| H | -3.519039000 | 3.962397000  | 0.006168000  |
| H | 1.713249000  | 5.023479000  | 0.047819000  |
| H | -3.950624000 | -3.528309000 | -0.017570000 |
| H | 5.031077000  | -1.700662000 | 0.031260000  |
| H | -1.693038000 | -5.020843000 | 0.005497000  |
| H | 3.538405000  | -3.958383000 | 0.050670000  |
| C | -3.360283000 | -0.682682000 | -0.016017000 |
| C | 3.375321000  | 0.684638000  | -0.013543000 |
| C | 0.694148000  | -3.365866000 | 0.013064000  |
| C | -0.673797000 | 3.368923000  | 0.013169000  |
| H | -4.426422000 | -0.899664000 | -0.021478000 |
| H | 4.441550000  | 0.900949000  | -0.001195000 |
| H | 0.910060000  | -4.432161000 | 0.026556000  |
| H | -0.889825000 | 4.435210000  | 0.025898000  |
| O | -0.038229000 | -0.005288000 | -1.825660000 |
| N | -0.039605000 | -0.008039000 | 1.828143000  |
| H | -1.016138000 | -0.191728000 | 2.115361000  |

${}^4\mathbf{4b}_{(\text{is})}$  Or  $\mathbf{4b-}{}^4\mathbf{R}_{(\text{is})}$

|    |              |              |              |
|----|--------------|--------------|--------------|
| Fe | 0.000012214  | 0.009273884  | -0.093065704 |
| N  | 1.436324174  | 1.436151038  | -0.012648012 |
| N  | 1.436876323  | -1.422429747 | -0.001064631 |
| N  | -1.435478052 | 1.437020392  | -0.013174063 |
| N  | -1.437797774 | -1.421545841 | -0.001516574 |
| C  | 1.237355746  | 2.784125102  | 0.004987278  |
| C  | 1.236897087  | -2.773031689 | 0.000380240  |
| C  | 2.786079496  | 1.242045087  | 0.004791170  |
| C  | 2.786968413  | -1.229290841 | 0.004857948  |
| C  | -1.235649821 | 2.784857229  | 0.004660408  |
| C  | -1.238659861 | -2.772274733 | 0.000265038  |
| C  | -2.785334663 | 1.243767750  | 0.004520751  |
| C  | -2.787755400 | -1.227558188 | 0.004717681  |
| C  | 2.509602757  | 3.476953384  | 0.027689193  |
| C  | 2.508473423  | -3.465138946 | 0.009205755  |
| C  | 3.474386932  | 2.516592960  | 0.027715970  |
| C  | 3.473601056  | -2.503966902 | 0.011533364  |
| C  | -2.507445835 | 3.478506651  | 0.027595688  |
| C  | -2.510692126 | -3.463574544 | 0.009355141  |
| C  | -3.472846259 | 2.518770482  | 0.027600763  |
| C  | -3.475198108 | -2.501785655 | 0.011833192  |
| H  | 2.622948687  | 4.555102021  | 0.045598223  |
| H  | 2.622444338  | -4.543360541 | 0.013163712  |
| H  | 4.552053659  | 2.634390256  | 0.044960719  |
| H  | 4.551274260  | -2.622758506 | 0.018303817  |
| H  | -2.620022786 | 4.556731654  | 0.045632558  |
| H  | -2.625415632 | -4.541717536 | 0.013506609  |
| H  | -4.550434768 | 2.637271245  | 0.044969762  |
| H  | -4.552948709 | -2.619844454 | 0.018883983  |
| C  | 0.001039047  | 3.420331000  | 0.007254422  |
| C  | -0.001080369 | -3.407138595 | 0.002164185  |
| C  | -3.424260485 | 0.009457710  | 0.007447534  |
| C  | 3.424231719  | 0.007332357  | 0.007603568  |
| H  | 0.001362517  | 4.507285359  | 0.023096406  |
| H  | -0.001425653 | -4.494257020 | 0.007018000  |
| H  | -4.511248536 | 0.010430517  | 0.018894979  |
| H  | 4.511224443  | 0.007582330  | 0.018811022  |
| O  | 0.000653648  | -0.036646690 | -1.780666488 |
| N  | -0.000558037 | -0.008544035 | 1.882151117  |
| H  | 0.000798498  | -1.013243164 | 2.138889820  |

**<sup>2</sup>4b<sub>(is)</sub> or 4b-<sup>2</sup>R<sub>(is)</sub>**

|    |              |              |              |
|----|--------------|--------------|--------------|
| Fe | 0.006721000  | 0.000247000  | -0.074917000 |
| N  | -1.430543000 | -1.433700000 | 0.001038000  |
| N  | -1.431186000 | 1.433223000  | 0.001309000  |
| N  | 1.440991000  | -1.433438000 | -0.009086000 |
| N  | 1.439926000  | 1.434687000  | -0.008616000 |
| C  | -1.231351000 | -2.783053000 | -0.000693000 |
| C  | -1.232972000 | 2.782753000  | -0.000701000 |
| C  | -2.781550000 | -1.238124000 | 0.003342000  |
| C  | -2.782140000 | 1.236772000  | 0.003335000  |
| C  | 1.243544000  | -2.781598000 | -0.000879000 |
| C  | 1.241820000  | 2.782802000  | -0.000545000 |
| C  | 2.788621000  | -1.235679000 | 0.008146000  |
| C  | 2.787736000  | 1.237667000  | 0.008478000  |
| C  | -2.503865000 | -3.473855000 | 0.001860000  |
| C  | -2.505925000 | 3.472697000  | 0.001544000  |
| C  | -3.468962000 | -2.512344000 | 0.005234000  |
| C  | -3.470366000 | 2.510531000  | 0.004883000  |
| C  | 2.517485000  | -3.472452000 | 0.016261000  |
| C  | 2.515358000  | 3.474307000  | 0.016514000  |
| C  | 3.479764000  | -2.509480000 | 0.021969000  |
| C  | 3.478145000  | 2.511828000  | 0.022291000  |
| H  | -2.619111000 | -4.551973000 | 0.001991000  |
| H  | -2.621892000 | 4.550738000  | 0.001504000  |
| H  | -4.546709000 | -2.630949000 | 0.007759000  |
| H  | -4.548194000 | 2.628370000  | 0.007224000  |
| H  | 2.633789000  | -4.550425000 | 0.025465000  |
| H  | 2.631078000  | 4.552341000  | 0.025643000  |
| H  | 4.557714000  | -2.625239000 | 0.037121000  |
| H  | 4.556033000  | 2.628168000  | 0.037441000  |
| C  | 0.006891000  | -3.417692000 | -0.000872000 |
| C  | 0.004825000  | 3.418222000  | -0.000733000 |
| C  | 3.424320000  | 0.001217000  | 0.013843000  |
| C  | -3.417821000 | -0.000828000 | 0.007848000  |
| H  | 0.007152000  | -4.504823000 | 0.003547000  |
| H  | 0.004412000  | 4.505352000  | 0.003491000  |
| H  | 4.511334000  | 0.001630000  | 0.028322000  |
| H  | -4.504916000 | -0.001071000 | 0.012334000  |
| O  | -0.009889000 | -0.001833000 | -1.757949000 |
| N  | 0.019150000  | -0.002931000 | 1.860200000  |
| H  | -0.986031000 | -0.000930000 | 2.118944000  |

**<sup>2</sup>4b<sub>(is)</sub> or 4b-<sup>2</sup>R<sub>(is)</sub>**

|    |              |              |              |
|----|--------------|--------------|--------------|
| Fe | -0.006454000 | -0.001009000 | -0.056322000 |
| N  | 1.450297000  | 1.414827000  | 0.000554000  |
| N  | 1.420222000  | -1.445330000 | 0.002760000  |
| N  | -1.430887000 | 1.446212000  | -0.008657000 |
| N  | -1.462140000 | -1.414646000 | -0.013036000 |
| C  | 1.262263000  | 2.765736000  | -0.007508000 |
| C  | 1.202752000  | -2.791711000 | -0.005470000 |
| C  | 2.799244000  | 1.207522000  | 0.006161000  |
| C  | 2.773045000  | -1.266874000 | 0.008246000  |
| C  | -1.215274000 | 2.791335000  | -0.005935000 |
| C  | -1.275093000 | -2.763988000 | -0.009009000 |
| C  | -2.780937000 | 1.266531000  | 0.011115000  |
| C  | -2.807848000 | -1.206301000 | 0.008135000  |
| C  | 2.541046000  | 3.445589000  | -0.005219000 |
| C  | 2.466584000  | -3.498865000 | -0.002481000 |
| C  | 3.497897000  | 2.475859000  | 0.004295000  |
| C  | 3.444173000  | -2.549940000 | 0.007025000  |
| C  | -2.480026000 | 3.499325000  | 0.011813000  |
| C  | -2.554735000 | -3.445026000 | 0.009089000  |
| C  | -3.455303000 | 2.549345000  | 0.022849000  |
| C  | -3.509507000 | -2.474562000 | 0.020205000  |
| H  | 2.665805000  | 4.522660000  | -0.009726000 |
| H  | 2.568268000  | -4.578359000 | -0.006912000 |
| H  | 4.576606000  | 2.585477000  | 0.008329000  |
| H  | 4.520256000  | -2.682838000 | 0.011088000  |
| H  | -2.582170000 | 4.578788000  | 0.017107000  |
| H  | -2.679776000 | -4.522068000 | 0.015198000  |
| H  | -4.531561000 | 2.679877000  | 0.039212000  |
| H  | -4.588288000 | -2.582143000 | 0.037455000  |

|   |              |              |              |
|---|--------------|--------------|--------------|
| C | 0.029875000  | 3.412101000  | -0.010648000 |
| C | -0.043437000 | -3.411155000 | -0.011166000 |
| C | -3.431441000 | 0.037010000  | 0.017599000  |
| C | 3.423212000  | -0.036391000 | 0.014949000  |
| H | 0.041532000  | 4.499245000  | -0.010629000 |
| H | -0.055165000 | -4.498306000 | -0.010602000 |
| H | -4.518382000 | 0.048875000  | 0.033996000  |
| H | 4.510230000  | -0.047858000 | 0.021143000  |
| O | 0.029919000  | 0.001339000  | -1.762849000 |
| N | -0.019942000 | -0.007744000 | 1.845922000  |
| H | 0.979310000  | 0.025705000  | 2.124435000  |

**4b-<sup>6</sup>ts1<sub>(hs)</sub>**

|    |              |              |              |
|----|--------------|--------------|--------------|
| Fe | -0.101284000 | -0.000995000 | -0.104219000 |
| N  | -1.349918000 | -1.683198000 | -0.080088000 |
| N  | 1.567611000  | -1.235089000 | -0.225830000 |
| N  | -1.770401000 | 1.242761000  | -0.039872000 |
| N  | 1.147761000  | 1.678241000  | -0.198281000 |
| C  | -2.705573000 | -1.662576000 | -0.023200000 |
| C  | 2.859235000  | -0.827934000 | -0.358485000 |
| C  | -0.938812000 | -2.975166000 | -0.087708000 |
| C  | 1.547087000  | -2.595173000 | -0.216743000 |
| C  | -3.063953000 | 0.829766000  | 0.018862000  |
| C  | 2.502249000  | 1.661439000  | -0.320875000 |
| C  | -1.750205000 | 2.601586000  | 0.000787000  |
| C  | 0.737450000  | 2.974796000  | -0.139281000 |
| C  | -3.200220000 | -3.031668000 | 0.004277000  |
| C  | 3.721758000  | -1.995973000 | -0.418154000 |
| C  | -2.104968000 | -3.845269000 | -0.033880000 |
| C  | 2.909776000  | -3.089922000 | -0.326504000 |
| C  | -3.929418000 | 1.996451000  | 0.096878000  |
| C  | 2.993012000  | 3.029075000  | -0.333733000 |
| C  | -3.116512000 | 3.092983000  | 0.086793000  |
| C  | 1.900475000  | 3.841844000  | -0.219457000 |
| H  | -4.245959000 | -3.316163000 | 0.048929000  |
| H  | 4.801434000  | -1.967833000 | -0.516820000 |
| H  | -2.074517000 | -4.929501000 | -0.026880000 |
| H  | 3.191535000  | -4.137226000 | -0.339860000 |
| H  | -5.012009000 | 1.964599000  | 0.154478000  |
| H  | 4.035701000  | 3.315834000  | -0.417136000 |
| H  | -3.399806000 | 4.138868000  | 0.134662000  |
| H  | 1.871924000  | 4.925779000  | -0.192577000 |
| C  | -3.495075000 | -0.505010000 | 0.017264000  |
| C  | 3.290597000  | 0.504347000  | -0.405029000 |
| C  | -0.596509000 | 3.398092000  | -0.043897000 |
| C  | 0.397856000  | -3.395410000 | -0.141723000 |
| H  | -4.571018000 | -0.659077000 | 0.067894000  |
| H  | 4.363106000  | 0.658994000  | -0.501627000 |
| H  | -0.755795000 | 4.473834000  | -0.008957000 |
| H  | 0.563808000  | -4.470749000 | -0.144127000 |
| O  | -0.105957000 | 0.018152000  | 1.733263000  |
| H  | 0.917961000  | -0.071048000 | 2.176225000  |
| H  | 2.737558000  | 0.698644000  | 2.352583000  |
| H  | 1.997849000  | -0.093189000 | 3.837206000  |
| H  | 2.585217000  | -1.121746000 | 2.431118000  |
| C  | 2.204481000  | -0.156850000 | 2.766436000  |
| N  | -0.211695000 | 0.044145000  | -1.959962000 |
| H  | -0.185853000 | 1.046078000  | -2.219061000 |

**4b-<sup>4</sup>ts1<sub>(hs)</sub>**

|    |              |              |              |
|----|--------------|--------------|--------------|
| Fe | -0.108360000 | 0.006893000  | -0.075172000 |
| N  | -0.990512000 | -1.889524000 | -0.162919000 |
| N  | 1.778310000  | -0.870146000 | -0.261901000 |
| N  | -1.982147000 | 0.899937000  | -0.004057000 |
| N  | 0.804556000  | 1.902595000  | -0.157414000 |
| C  | -2.323101000 | -2.132107000 | -0.055200000 |
| C  | 2.969544000  | -0.214023000 | -0.347248000 |
| C  | -0.333403000 | -3.077949000 | -0.156834000 |
| C  | 2.030196000  | -2.210323000 | -0.262980000 |
| C  | -3.168053000 | 0.242359000  | 0.038659000  |
| C  | 2.132455000  | 2.158721000  | -0.277079000 |
| C  | -2.227690000 | 2.233915000  | 0.010516000  |

|   |              |              |              |
|---|--------------|--------------|--------------|
| C | 0.141145000  | 3.087708000  | -0.130225000 |
| C | -2.537181000 | -3.569793000 | -0.000165000 |
| C | 4.045251000  | -1.186911000 | -0.396888000 |
| C | -1.304714000 | -4.156197000 | -0.061329000 |
| C | 3.464399000  | -2.422982000 | -0.342137000 |
| C | -4.249001000 | 1.216901000  | 0.095688000  |
| C | 2.340464000  | 3.598301000  | -0.313033000 |
| C | -3.666225000 | 2.450941000  | 0.078420000  |
| C | 1.105184000  | 4.173886000  | -0.222914000 |
| H | -3.504707000 | -4.053058000 | 0.083576000  |
| H | 5.100762000  | -0.945117000 | -0.459091000 |
| H | -1.064181000 | -5.213645000 | -0.037661000 |
| H | 3.949808000  | -3.392847000 | -0.358885000 |
| H | -5.305703000 | 0.975212000  | 0.135764000  |
| H | 3.304027000  | 4.088948000  | -0.400009000 |
| H | -4.150037000 | 3.421363000  | 0.107406000  |
| H | 0.857144000  | 5.229924000  | -0.220304000 |
| C | -3.324673000 | -1.151953000 | 0.019986000  |
| C | 3.133364000  | 1.179255000  | -0.361151000 |
| C | -1.251184000 | 3.239663000  | -0.042179000 |
| C | 1.060845000  | -3.224304000 | -0.212228000 |
| H | -4.347261000 | -1.518706000 | 0.083813000  |
| H | 4.156699000  | 1.539980000  | -0.442404000 |
| H | -1.618985000 | 4.263826000  | -0.028542000 |
| H | 1.437607000  | -4.245085000 | -0.209525000 |
| O | -0.141902000 | -0.019807000 | 1.753691000  |
| H | 0.890286000  | -0.083092000 | 2.211714000  |
| H | 2.639833000  | 0.789101000  | 2.392482000  |
| H | 1.993120000  | -0.126741000 | 3.847203000  |
| H | 2.618728000  | -1.037443000 | 2.378732000  |
| C | 2.174083000  | -0.121685000 | 2.769419000  |
| N | -0.272049000 | 0.009726000  | -1.968955000 |
| H | 0.358102000  | -0.762038000 | -2.259202000 |

#### 4b-<sup>4</sup>ts1<sub>(is)</sub>

|    |              |              |              |
|----|--------------|--------------|--------------|
| Fe | -0.100874000 | 0.013091000  | -0.121217000 |
| N  | -1.293896000 | -1.630096000 | -0.085924000 |
| N  | 1.546840000  | -1.150492000 | -0.244601000 |
| N  | -1.755168000 | 1.184017000  | -0.026602000 |
| N  | 1.084976000  | 1.652298000  | -0.183328000 |
| C  | -2.654939000 | -1.662737000 | -0.035202000 |
| C  | 2.842701000  | -0.744737000 | -0.383072000 |
| C  | -0.870767000 | -2.926458000 | -0.050941000 |
| C  | 1.571012000  | -2.515639000 | -0.184672000 |
| C  | -3.055512000 | 0.775987000  | 0.002903000  |
| C  | 2.440373000  | 1.690385000  | -0.340621000 |
| C  | -1.773924000 | 2.544818000  | 0.021630000  |
| C  | 0.666102000  | 2.948439000  | -0.116922000 |
| C  | -3.120254000 | -3.033878000 | 0.021637000  |
| C  | 3.725243000  | -1.890528000 | -0.404777000 |
| C  | -2.008716000 | -3.820927000 | 0.016764000  |
| C  | 2.934194000  | -2.992932000 | -0.274013000 |
| C  | -3.939389000 | 1.923079000  | 0.071849000  |
| C  | 2.904236000  | 3.062087000  | -0.360186000 |
| C  | -3.140624000 | 3.025039000  | 0.088022000  |
| C  | 1.799517000  | 3.845275000  | -0.215615000 |
| H  | -4.162284000 | -3.330050000 | 0.067940000  |
| H  | 4.803852000  | -1.835985000 | -0.499999000 |
| H  | -1.941524000 | -4.902484000 | 0.055239000  |
| H  | 3.224278000  | -4.037283000 | -0.244938000 |
| H  | -5.021660000 | 1.866684000  | 0.106399000  |
| H  | 3.940573000  | 3.361321000  | -0.470035000 |
| H  | -3.425049000 | 4.070306000  | 0.135882000  |
| H  | 1.733078000  | 4.927109000  | -0.184962000 |
| C  | -3.485132000 | -0.545963000 | -0.011160000 |
| C  | 3.267430000  | 0.578560000  | -0.446865000 |
| C  | -0.654820000 | 3.370662000  | -0.005953000 |
| C  | 0.456224000  | -3.343343000 | -0.087464000 |
| H  | -4.557264000 | -0.722558000 | 0.025538000  |
| H  | 4.334123000  | 0.756218000  | -0.557083000 |
| H  | -0.829132000 | 4.443045000  | 0.035752000  |
| H  | 0.638998000  | -4.414662000 | -0.054258000 |
| O  | -0.101124000 | -0.069059000 | 1.721388000  |
| H  | 0.929140000  | -0.074444000 | 2.151802000  |

|   |              |              |              |
|---|--------------|--------------|--------------|
| H | 2.694600000  | 0.808323000  | 2.326801000  |
| H | 2.019756000  | -0.044179000 | 3.807891000  |
| H | 2.668922000  | -1.018586000 | 2.392507000  |
| C | 2.222433000  | -0.084859000 | 2.735220000  |
| N | -0.191679000 | -0.032323000 | -1.983931000 |
| H | -0.108520000 | -1.018498000 | -2.286628000 |

#### 4b-<sup>2</sup>ts1<sub>(is)</sub>

|    |              |              |              |
|----|--------------|--------------|--------------|
| Fe | -0.100063000 | 0.007461000  | -0.128834000 |
| N  | 1.089978000  | -1.634358000 | -0.192936000 |
| N  | 1.551374000  | 1.171662000  | -0.227429000 |
| N  | -1.754449000 | -1.160495000 | -0.039459000 |
| N  | -1.284294000 | 1.651928000  | -0.074951000 |
| C  | 0.671071000  | -2.930814000 | -0.104499000 |
| C  | 1.577323000  | 2.534156000  | -0.182048000 |
| C  | 2.445223000  | -1.672321000 | -0.342491000 |
| C  | 2.845928000  | 0.764415000  | -0.382663000 |
| C  | -1.771825000 | -2.523352000 | 0.029152000  |
| C  | -0.861554000 | 2.946580000  | -0.052902000 |
| C  | -3.052910000 | -0.751163000 | -0.002378000 |
| C  | -2.646515000 | 1.686340000  | -0.040645000 |
| C  | 1.805339000  | -3.826634000 | -0.187655000 |
| C  | 2.940572000  | 3.011969000  | -0.289730000 |
| C  | 2.909871000  | -3.043277000 | -0.341517000 |
| C  | 3.729793000  | 1.909733000  | -0.423060000 |
| C  | -3.137763000 | -3.000413000 | 0.107816000  |
| C  | -1.999585000 | 3.843774000  | -0.003893000 |
| C  | -3.935727000 | -1.897009000 | 0.083849000  |
| C  | -3.111703000 | 3.058817000  | -0.001844000 |
| H  | 1.741421000  | -4.907890000 | -0.137593000 |
| H  | 3.230083000  | 4.056798000  | -0.274352000 |
| H  | 3.947047000  | -3.343201000 | -0.440978000 |
| H  | 4.806967000  | 1.853949000  | -0.532995000 |
| H  | -3.423410000 | -4.044437000 | 0.172315000  |
| H  | -1.931057000 | 4.925647000  | 0.021673000  |
| H  | -5.017642000 | -1.839872000 | 0.126906000  |
| H  | -4.153947000 | 3.356284000  | 0.029314000  |
| C  | -0.652252000 | -3.348736000 | 0.007557000  |
| C  | 0.464474000  | 3.364581000  | -0.084901000 |
| C  | -3.479423000 | 0.573863000  | -0.018093000 |
| C  | 3.270643000  | -0.556790000 | -0.452076000 |
| H  | -0.827534000 | -4.420347000 | 0.064117000  |
| H  | 0.647376000  | 4.436069000  | -0.061107000 |
| H  | -4.551215000 | 0.752843000  | 0.015712000  |
| H  | 4.337024000  | -0.733683000 | -0.567031000 |
| O  | -0.116566000 | -0.059389000 | 1.725770000  |
| H  | 0.923126000  | -0.034737000 | 2.170412000  |
| H  | 2.543896000  | 1.065666000  | 2.398602000  |
| H  | 2.019492000  | 0.006688000  | 3.801346000  |
| H  | 2.748489000  | -0.745377000 | 2.294443000  |
| C  | 2.190820000  | 0.086990000  | 2.724766000  |
| N  | -0.229087000 | -0.087541000 | -1.970376000 |
| H  | -0.331408000 | -1.075910000 | -2.257688000 |

#### 4b-<sup>2</sup>ts1<sub>(ls)</sub>

|    |              |              |              |
|----|--------------|--------------|--------------|
| Fe | 0.096081000  | 0.003069000  | -0.120919000 |
| N  | -1.135119000 | 1.610760000  | -0.194116000 |
| N  | -1.524302000 | -1.205298000 | -0.226753000 |
| N  | 1.721608000  | 1.215166000  | -0.041631000 |
| N  | 1.332288000  | -1.605124000 | -0.087707000 |
| C  | -0.751421000 | 2.916864000  | -0.123229000 |
| C  | -1.511404000 | -2.567341000 | -0.176596000 |
| C  | -2.489232000 | 1.611005000  | -0.353093000 |
| C  | -2.827328000 | -0.834463000 | -0.379714000 |
| C  | 1.700592000  | 2.577859000  | 0.020395000  |
| C  | 0.940949000  | -2.911422000 | -0.051697000 |
| C  | 3.033438000  | 0.843806000  | 0.003646000  |
| C  | 2.695296000  | -1.604560000 | -0.035032000 |
| C  | -1.908458000 | 3.783068000  | -0.221720000 |
| C  | -2.861567000 | -3.083987000 | -0.277032000 |
| C  | -2.990731000 | 2.969464000  | -0.370703000 |
| C  | -3.680697000 | -2.003999000 | -0.411227000 |



|   |              |              |              |
|---|--------------|--------------|--------------|
| C | 3.051706000  | 3.094140000  | 0.105037000  |
| C | 2.100550000  | -3.776651000 | 0.018083000  |
| C | 3.882122000  | 2.014596000  | 0.089735000  |
| C | 3.193355000  | -2.963288000 | 0.022778000  |
| H | -1.872460000 | 4.866249000  | -0.187225000 |
| H | -3.122341000 | -4.136193000 | -0.256247000 |
| H | -4.034798000 | 3.240192000  | -0.480901000 |
| H | -4.759258000 | -1.978014000 | -0.518105000 |
| H | 3.306672000  | 4.146220000  | 0.166049000  |
| H | 2.059917000  | -4.859479000 | 0.057679000  |
| H | 4.964997000  | 1.989478000  | 0.138405000  |
| H | 4.242045000  | -3.234388000 | 0.070786000  |
| C | 0.559013000  | 3.372439000  | -0.009065000 |
| C | -0.374116000 | -3.364391000 | -0.082301000 |
| C | 3.497808000  | -0.467931000 | -0.010747000 |
| C | -3.285943000 | 0.475762000  | -0.455594000 |
| H | 0.704931000  | 4.448750000  | 0.039608000  |
| H | -0.526263000 | -4.440589000 | -0.050883000 |
| H | 4.573773000  | -0.617147000 | 0.031683000  |
| H | -4.356191000 | 0.624901000  | -0.573017000 |
| O | 0.105398000  | -0.010874000 | 1.725933000  |
| H | -0.934133000 | -0.035626000 | 2.170484000  |
| N | 0.175041000  | 0.009154000  | -1.993136000 |
| H | 1.189684000  | -0.052145000 | -2.209019000 |
| H | -2.628056000 | -1.019457000 | 2.410909000  |
| H | -2.028608000 | 0.004002000  | 3.809965000  |
| H | -2.708803000 | 0.800850000  | 2.304340000  |
| C | -2.207099000 | -0.066472000 | 2.733963000  |

$[(\text{NH}_2)\text{Fe}^{\text{IV}}(\text{O})(\text{Por}^{\bullet+})]$  (**4c**)

${}^6\mathbf{4c}_{(\text{hs})}$  or  $\mathbf{4c-}{}^6\mathbf{R}_{(\text{hs})}$

|    |              |              |              |
|----|--------------|--------------|--------------|
| Fe | -0.031601000 | 0.004677000  | -0.205274000 |
| N  | -0.289742000 | -2.048238000 | 0.012317000  |
| N  | -2.066437000 | 0.280605000  | 0.077524000  |
| N  | 2.032108000  | -0.276190000 | 0.006798000  |
| N  | 0.267626000  | 2.051616000  | 0.012778000  |
| C  | 0.690483000  | -2.996795000 | -0.012047000 |
| C  | -2.713716000 | 1.480001000  | 0.063432000  |
| C  | -1.493571000 | -2.695704000 | 0.017389000  |
| C  | -3.010489000 | -0.702325000 | 0.063898000  |
| C  | 2.685180000  | -1.485258000 | -0.001332000 |
| C  | -0.719891000 | 2.996619000  | 0.016847000  |
| C  | 2.984115000  | 0.714928000  | 0.000033000  |
| C  | 1.465286000  | 2.704195000  | -0.010727000 |
| C  | 0.085336000  | -4.312861000 | -0.016909000 |
| C  | -4.144871000 | 1.251587000  | 0.063995000  |
| C  | -1.265984000 | -4.126086000 | 0.000855000  |
| C  | -4.328667000 | -0.100155000 | 0.064329000  |
| C  | 4.110193000  | -1.247879000 | -0.009817000 |
| C  | -0.119075000 | 4.314473000  | 0.000522000  |
| C  | 4.294117000  | 0.105991000  | -0.008930000 |
| C  | 1.233142000  | 4.134049000  | -0.016103000 |
| H  | 0.634309000  | -5.246573000 | -0.031291000 |
| H  | -4.896446000 | 2.031625000  | 0.062161000  |
| H  | -2.047034000 | -4.876632000 | 0.005646000  |
| H  | -5.261096000 | -0.651447000 | 0.062799000  |
| H  | 4.864721000  | -2.024990000 | -0.024677000 |
| H  | -0.671840000 | 5.246051000  | 0.004690000  |
| H  | 5.228489000  | 0.653904000  | -0.023051000 |
| H  | 2.011069000  | 4.887712000  | -0.029953000 |
| C  | 2.065630000  | -2.734754000 | -0.014984000 |
| C  | -2.091335000 | 2.732736000  | 0.045039000  |
| C  | 2.720663000  | 2.084376000  | -0.012747000 |
| C  | -2.745018000 | -2.075640000 | 0.046052000  |
| H  | 2.723335000  | -3.599321000 | -0.029276000 |
| H  | -2.748851000 | 3.597744000  | 0.042172000  |
| H  | 3.585142000  | 2.742221000  | -0.026174000 |
| H  | -3.609213000 | -2.734218000 | 0.043654000  |
| O  | -0.132167000 | 0.018929000  | -1.825363000 |
| N  | 0.374483000  | -0.052655000 | 1.851083000  |
| H  | 0.695126000  | -0.940982000 | 2.243656000  |

|   |             |             |             |
|---|-------------|-------------|-------------|
| H | 0.935794000 | 0.706915000 | 2.243432000 |
|---|-------------|-------------|-------------|

${}^4\mathbf{4c}_{(\text{hs})}$  or  $\mathbf{4c-}{}^4\mathbf{R}_{(\text{hs})}$

|    |              |              |              |
|----|--------------|--------------|--------------|
| Fe | -0.030278000 | 0.000026000  | -0.197031000 |
| N  | -0.018650000 | -2.068119000 | 0.023484000  |
| N  | -2.087260000 | 0.003462000  | 0.053528000  |
| N  | 2.046519000  | -0.003370000 | 0.029884000  |
| N  | -0.011808000 | 2.068172000  | 0.023272000  |
| C  | 1.079125000  | -2.877949000 | -0.009463000 |
| C  | -2.889964000 | 1.104954000  | 0.052845000  |
| C  | -1.125091000 | -2.870568000 | 0.013461000  |
| C  | -2.893614000 | -1.095361000 | 0.052757000  |
| C  | 2.855196000  | -1.113292000 | 0.008204000  |
| C  | -1.115578000 | 2.874291000  | 0.013451000  |
| C  | 2.858873000  | 1.103863000  | 0.008077000  |
| C  | 1.088642000  | 2.874369000  | -0.009630000 |
| C  | 0.654774000  | -4.262698000 | -0.029922000 |
| C  | -4.278174000 | 0.689134000  | 0.067267000  |
| C  | -0.709392000 | -4.257644000 | -0.015780000 |
| C  | -4.280448000 | -0.674925000 | 0.067198000  |
| C  | 4.237009000  | -0.689820000 | -0.010890000 |
| C  | -0.695276000 | 4.259996000  | -0.015677000 |
| C  | 4.239284000  | 0.675794000  | -0.010978000 |
| C  | 0.668898000  | 4.260507000  | -0.029920000 |
| H  | 1.323140000  | -5.114834000 | -0.052109000 |
| H  | -5.126610000 | 1.362493000  | 0.075872000  |
| H  | -1.383750000 | -5.105316000 | -0.023091000 |
| H  | -5.131136000 | -1.345434000 | 0.075751000  |
| H  | 5.087469000  | -1.360415000 | -0.031559000 |
| H  | -1.366789000 | 5.109922000  | -0.022851000 |
| H  | 5.091987000  | 1.343529000  | -0.031736000 |
| H  | 1.340115000  | 5.110402000  | -0.052062000 |
| C  | 2.406888000  | -2.434314000 | -0.009686000 |
| C  | -2.439775000 | 2.429625000  | 0.036567000  |
| C  | 2.414922000  | 2.426362000  | -0.009894000 |
| C  | -2.447798000 | -2.421529000 | 0.036463000  |
| H  | 3.173679000  | -3.203662000 | -0.032521000 |
| H  | -3.206510000 | 3.199567000  | 0.032678000  |
| H  | 3.184280000  | 3.193144000  | -0.032766000 |
| H  | -3.217105000 | -3.188900000 | 0.032445000  |
| O  | -0.050029000 | -0.000094000 | -1.823342000 |
| N  | 0.353276000  | -0.000513000 | 1.879871000  |
| H  | 0.835161000  | -0.829881000 | 2.237343000  |
| H  | 0.837998000  | 0.827266000  | 2.237193000  |

${}^4\mathbf{4c}_{(\text{is})}$  or  $\mathbf{4c-}{}^4\mathbf{R}_{(\text{is})}$

|    |              |              |              |
|----|--------------|--------------|--------------|
| Fe | 0.000080000  | 0.026831000  | -0.144882000 |
| N  | 2.015799000  | 0.012068000  | -0.006113000 |
| N  | -0.004788000 | -1.995504000 | -0.010078000 |
| N  | 0.004908000  | 2.029452000  | 0.038815000  |
| N  | -2.015660000 | 0.021778000  | -0.006205000 |
| C  | 2.841543000  | 1.105057000  | 0.002511000  |
| C  | -1.107142000 | -2.820040000 | -0.016210000 |
| C  | 2.836700000  | -1.082803000 | -0.029131000 |
| C  | 1.093491000  | -2.825470000 | -0.016032000 |
| C  | 1.099988000  | 2.848525000  | 0.040050000  |
| C  | -2.841957000 | -1.069032000 | -0.029375000 |
| C  | -1.086106000 | 2.853912000  | 0.040084000  |
| C  | -2.836011000 | 1.118836000  | 0.002582000  |
| C  | 4.223581000  | 0.688611000  | -0.010660000 |
| C  | -0.691574000 | -4.199474000 | -0.015833000 |
| C  | 4.220912000  | -0.672423000 | -0.030383000 |
| C  | 0.671067000  | -4.202876000 | -0.015700000 |
| C  | 0.690719000  | 4.233393000  | 0.055632000  |
| C  | -4.224162000 | -0.651770000 | -0.030566000 |
| C  | -0.669965000 | 4.236787000  | 0.055671000  |
| C  | -4.220042000 | 0.709258000  | -0.010623000 |
| H  | 5.068594000  | 1.365938000  | -0.003798000 |
| H  | -1.370682000 | -5.043097000 | -0.022917000 |
| H  | 5.062859000  | -1.353504000 | -0.043853000 |
| H  | 1.345883000  | -5.049928000 | -0.022653000 |
| H  | 1.372911000  | 5.074442000  | 0.064155000  |

|   |              |              |              |
|---|--------------|--------------|--------------|
| H | -5.069544000 | -1.328586000 | -0.044116000 |
| H | -1.347887000 | 5.081271000  | 0.064245000  |
| H | -5.061621000 | 1.390855000  | -0.003624000 |
| C | 2.422899000  | 2.427082000  | 0.028481000  |
| C | -2.425832000 | -2.395139000 | -0.032824000 |
| C | -2.411057000 | 2.438802000  | 0.028632000  |
| C | 2.414233000  | -2.406869000 | -0.032502000 |
| H | 3.191130000  | 3.194335000  | 0.033360000  |
| H | -3.196192000 | -3.160085000 | -0.046481000 |
| H | -3.175491000 | 3.209835000  | 0.033551000  |
| H | 3.180816000  | -3.175604000 | -0.046057000 |
| O | 0.000394000  | 0.097278000  | -1.773024000 |
| N | -0.001344000 | -0.358151000 | 1.913309000  |
| H | -0.831481000 | -0.824760000 | 2.289097000  |
| H | 0.825357000  | -0.830650000 | 2.289309000  |

<sup>2</sup>4c<sub>(is)</sub> or 4c-<sup>2</sup>R<sub>(is)</sub>

|    |              |              |              |
|----|--------------|--------------|--------------|
| Fe | -0.034547000 | 0.000062000  | -0.126864000 |
| N  | 1.999191000  | -0.001798000 | -0.001967000 |
| N  | -0.023932000 | -2.015645000 | 0.003900000  |
| N  | -0.020202000 | 2.015689000  | 0.003910000  |
| N  | -2.033281000 | 0.001904000  | 0.022559000  |
| C  | 2.825195000  | 1.097084000  | -0.019749000 |
| C  | -1.118460000 | -2.838643000 | 0.003919000  |
| C  | 2.823204000  | -1.102193000 | -0.019305000 |
| C  | 1.070655000  | -2.838042000 | -0.018206000 |
| C  | 1.075848000  | 2.836137000  | -0.018765000 |
| C  | -2.856499000 | -1.090946000 | 0.023205000  |
| C  | -1.113256000 | 2.840657000  | 0.004446000  |
| C  | -2.854545000 | 1.096212000  | 0.023785000  |
| C  | 4.204230000  | 0.677563000  | -0.034858000 |
| C  | -0.704738000 | -4.221439000 | -0.008524000 |
| C  | 4.203009000  | -0.685171000 | -0.034507000 |
| C  | 0.656441000  | -4.221287000 | -0.022062000 |
| C  | 0.664105000  | 4.220130000  | -0.022493000 |
| C  | -4.239638000 | -0.676563000 | 0.034501000  |
| C  | -0.697062000 | 4.222695000  | -0.008227000 |
| C  | -4.238436000 | 0.684300000  | 0.034909000  |
| H  | 5.050261000  | 1.353583000  | -0.050432000 |
| H  | -1.383631000 | -5.065227000 | -0.007247000 |
| H  | 5.047850000  | -1.362684000 | -0.049753000 |
| H  | 1.335665000  | -5.064758000 | -0.035077000 |
| H  | 1.344793000  | 5.062412000  | -0.035870000 |
| H  | -5.083289000 | -1.355578000 | 0.041147000  |
| H  | -1.374495000 | 5.067657000  | -0.006620000 |
| H  | -5.080904000 | 1.364773000  | 0.041945000  |
| C  | 2.400999000  | 2.416799000  | -0.027788000 |
| C  | -2.439601000 | -2.415385000 | 0.017227000  |
| C  | -2.435171000 | 2.419884000  | 0.018192000  |
| C  | 2.396569000  | -2.421134000 | -0.026940000 |
| H  | 3.166603000  | 3.186480000  | -0.045193000 |
| H  | -3.209586000 | -3.180892000 | 0.017228000  |
| H  | -3.203752000 | 3.186800000  | 0.018630000  |
| H  | 3.160801000  | -3.192186000 | -0.043960000 |
| O  | -0.007479000 | -0.000263000 | -1.752489000 |
| N  | 0.344928000  | -0.000424000 | 1.898813000  |
| H  | 0.790894000  | -0.831992000 | 2.295219000  |
| H  | 0.792816000  | 0.830076000  | 2.295292000  |

<sup>2</sup>4c<sub>(ls)</sub> or 4c-<sup>2</sup>R<sub>(ls)</sub>

|    |              |              |              |
|----|--------------|--------------|--------------|
| Fe | -0.037931000 | 0.000067000  | -0.116046000 |
| N  | 2.001891000  | -0.002847000 | -0.001836000 |
| N  | -0.026363000 | -2.016092000 | 0.004129000  |
| N  | -0.020555000 | 2.016160000  | 0.003958000  |
| N  | -2.033216000 | 0.002949000  | 0.012613000  |
| C  | 2.826802000  | 1.095106000  | -0.020597000 |
| C  | -1.120536000 | -2.838839000 | 0.003852000  |
| C  | 2.823633000  | -1.103177000 | -0.020279000 |
| C  | 1.069027000  | -2.837981000 | -0.015341000 |
| C  | 1.077173000  | 2.834918000  | -0.015744000 |
| C  | -2.857189000 | -1.089976000 | 0.015566000  |
| C  | -1.112364000 | 2.842039000  | 0.004129000  |

|   |              |              |              |
|---|--------------|--------------|--------------|
| C | -2.854069000 | 1.098218000  | 0.015909000  |
| C | 4.206375000  | 0.675239000  | -0.037605000 |
| C | -0.706662000 | -4.221591000 | -0.005248000 |
| C | 4.204392000  | -0.687337000 | -0.037304000 |
| C | 0.654537000  | -4.221243000 | -0.017028000 |
| C | 0.666694000  | 4.219344000  | -0.017161000 |
| C | -4.239761000 | -0.674327000 | 0.027300000  |
| C | -0.694491000 | 4.223626000  | -0.005035000 |
| C | -4.237798000 | 0.686562000  | 0.027625000  |
| H | 5.052634000  | 1.350960000  | -0.053972000 |
| H | -1.385473000 | -5.065436000 | -0.003667000 |
| H | 5.048672000  | -1.365541000 | -0.053394000 |
| H | 1.333824000  | -5.064689000 | -0.027928000 |
| H | 1.348438000  | 5.060807000  | -0.028161000 |
| H | -5.083893000 | -1.352730000 | 0.034661000  |
| H | -1.370854000 | 5.069431000  | -0.003198000 |
| H | -5.079960000 | 1.367409000  | 0.035272000  |
| C | 2.402026000  | 2.415068000  | -0.025795000 |
| C | -2.441615000 | -2.414603000 | 0.012952000  |
| C | -2.434679000 | 2.421629000  | 0.013522000  |
| C | 2.395083000  | -2.421906000 | -0.025224000 |
| H | 3.167537000  | 3.184867000  | -0.042121000 |
| H | -3.212318000 | -3.179356000 | 0.013595000  |
| H | -3.203110000 | 3.188663000  | 0.014479000  |
| H | 3.158352000  | -3.193933000 | -0.041337000 |
| O | 0.025297000  | -0.000223000 | -1.742295000 |
| N | 0.322643000  | -0.000458000 | 1.879595000  |
| H | 0.767851000  | -0.832484000 | 2.275652000  |
| H | 0.771856000  | 0.829482000  | 2.275491000  |

4c-<sup>6</sup>ts1<sub>(hs)</sub>

|    |              |              |              |
|----|--------------|--------------|--------------|
| Fe | 0.066119000  | 0.009473000  | 0.125161000  |
| N  | 1.133400000  | 1.793826000  | -0.089332000 |
| N  | -1.699020000 | 1.032568000  | -0.217583000 |
| N  | 1.871643000  | -1.024290000 | -0.009714000 |
| N  | -0.956900000 | -1.787387000 | -0.184496000 |
| C  | 2.490086000  | 1.942887000  | -0.052744000 |
| C  | -2.938944000 | 0.486500000  | -0.400180000 |
| C  | 0.579527000  | 3.042658000  | -0.128072000 |
| C  | -1.836526000 | 2.392678000  | -0.255606000 |
| C  | 3.126532000  | -0.475250000 | 0.026975000  |
| C  | -2.304700000 | -1.933062000 | -0.353074000 |
| C  | 2.009248000  | -2.388743000 | 0.024851000  |
| C  | -0.405480000 | -3.037043000 | -0.145178000 |
| C  | 2.817758000  | 3.354030000  | -0.072961000 |
| C  | -3.913787000 | 1.546296000  | -0.527950000 |
| C  | 1.635558000  | 4.033981000  | -0.115541000 |
| C  | -3.232368000 | 2.726626000  | -0.432643000 |
| C  | 4.103569000  | -1.537808000 | 0.093809000  |
| C  | -2.628583000 | -3.343379000 | -0.411431000 |
| C  | 3.414308000  | -2.717801000 | 0.095054000  |
| C  | -1.453889000 | -4.026449000 | -0.280293000 |
| H  | 3.823133000  | 3.756900000  | -0.053898000 |
| H  | -4.975823000 | 1.395634000  | -0.679262000 |
| H  | 1.478715000  | 5.105522000  | -0.140749000 |
| H  | -3.624923000 | 3.734329000  | -0.494544000 |
| H  | 5.175578000  | -1.388917000 | 0.139206000  |
| H  | -3.626532000 | -3.744861000 | -0.539716000 |
| H  | 3.811215000  | -3.724699000 | 0.139478000  |
| H  | -1.297674000 | -5.098380000 | -0.281224000 |
| C  | 3.412158000  | 0.892711000  | 0.001105000  |
| C  | -3.221047000 | -0.882241000 | -0.453394000 |
| C  | 0.961771000  | -3.312093000 | -0.031417000 |
| C  | -0.788869000 | 3.317687000  | -0.188987000 |
| H  | 4.462428000  | 1.168470000  | 0.031111000  |
| H  | -4.262659000 | -1.157358000 | -0.593307000 |
| H  | 1.243720000  | -4.360995000 | -0.008922000 |
| H  | -1.069814000 | 4.366607000  | -0.224372000 |
| O  | 0.118908000  | -0.040774000 | 1.990284000  |
| H  | -1.034593000 | 0.053256000  | 2.422439000  |
| H  | -2.760005000 | -0.692417000 | 2.290592000  |
| H  | -2.212999000 | 0.046775000  | 3.874991000  |
| H  | -2.594052000 | 1.116847000  | 2.436046000  |
| C  | -2.258878000 | 0.139552000  | 2.787100000  |

|   |             |              |              |
|---|-------------|--------------|--------------|
| N | 0.432175000 | -0.151434000 | -2.075751000 |
| H | 1.349201000 | 0.279009000  | -2.251216000 |
| H | 0.570967000 | -1.149232000 | -2.281512000 |

#### 4c-<sup>4</sup>ts1<sub>(hs)</sub>

|    |              |              |              |
|----|--------------|--------------|--------------|
| Fe | -0.079854000 | 0.051424000  | -0.032777000 |
| N  | -1.050403000 | -1.823563000 | -0.150047000 |
| N  | 1.718152000  | -0.889050000 | -0.249169000 |
| N  | -1.900839000 | 0.979307000  | -0.008144000 |
| N  | 0.870335000  | 1.909095000  | -0.246069000 |
| C  | -2.400478000 | -2.027958000 | -0.059224000 |
| C  | 2.942772000  | -0.276504000 | -0.320766000 |
| C  | -0.438029000 | -3.046020000 | -0.181975000 |
| C  | 1.934038000  | -2.241298000 | -0.249025000 |
| C  | -3.118812000 | 0.369557000  | 0.088946000  |
| C  | 2.211219000  | 2.121003000  | -0.325604000 |
| C  | -2.105924000 | 2.329800000  | 0.055966000  |
| C  | 0.263102000  | 3.123122000  | -0.170940000 |
| C  | -2.659659000 | -3.452054000 | -0.048392000 |
| C  | 3.978562000  | -1.284579000 | -0.353320000 |
| C  | -1.448639000 | -4.080588000 | -0.123435000 |
| C  | 3.356461000  | -2.498400000 | -0.308182000 |
| C  | -4.150571000 | 1.379333000  | 0.218715000  |
| C  | 2.477108000  | 3.547571000  | -0.325701000 |
| C  | -3.524465000 | 2.589958000  | 0.199174000  |
| C  | 1.266594000  | 4.170074000  | -0.229222000 |
| H  | -3.642294000 | -3.902168000 | 0.025626000  |
| H  | 5.040031000  | -1.076376000 | -0.410424000 |
| H  | -1.247389000 | -5.145083000 | -0.122448000 |
| H  | 3.805159000  | -3.484252000 | -0.321935000 |
| H  | -5.209660000 | 1.171389000  | 0.310445000  |
| H  | 3.460509000  | 3.998216000  | -0.385018000 |
| H  | -3.966649000 | 3.576269000  | 0.270096000  |
| H  | 1.060198000  | 5.233006000  | -0.193935000 |
| C  | -3.350654000 | -1.011721000 | 0.051092000  |
| C  | 3.169873000  | 1.102616000  | -0.364617000 |
| C  | -1.116572000 | 3.313663000  | -0.030672000 |
| C  | 0.944276000  | -3.232556000 | -0.222029000 |
| H  | -4.387882000 | -1.325580000 | 0.130104000  |
| H  | 4.209298000  | 1.414264000  | -0.423299000 |
| H  | -1.460052000 | 4.343095000  | 0.026365000  |
| H  | 1.295812000  | -4.260582000 | -0.232688000 |
| O  | -0.058037000 | 0.080548000  | 1.725114000  |
| H  | 0.926049000  | -0.257471000 | 2.160346000  |
| N  | -0.397058000 | -0.288216000 | -1.993133000 |
| H  | 2.779548000  | 0.250346000  | 2.539899000  |
| H  | 1.838459000  | -0.623305000 | 3.858400000  |
| H  | 2.426950000  | -1.543090000 | 2.374127000  |
| C  | 2.137414000  | -0.587662000 | 2.810114000  |
| H  | -1.374310000 | -0.323580000 | -2.292854000 |
| H  | 0.099714000  | -1.083662000 | -2.401002000 |

#### 4c-<sup>4</sup>ts1<sub>(is)</sub>

|    |              |              |              |
|----|--------------|--------------|--------------|
| Fe | -0.127310000 | 0.000478000  | -0.090898000 |
| N  | -0.621423000 | -1.945691000 | -0.147905000 |
| N  | 1.844926000  | -0.501998000 | -0.211414000 |
| N  | -2.064117000 | 0.501579000  | 0.023488000  |
| N  | 0.385945000  | 1.950242000  | -0.209158000 |
| C  | -1.885943000 | -2.467945000 | -0.098269000 |
| C  | 2.910837000  | 0.352410000  | -0.318894000 |
| C  | 0.237508000  | -3.014667000 | -0.137306000 |
| C  | 2.365713000  | -1.768499000 | -0.193950000 |
| C  | -3.133077000 | -0.349827000 | 0.054152000  |
| C  | 1.650724000  | 2.471965000  | -0.304958000 |
| C  | -2.578808000 | 1.766734000  | 0.094078000  |
| C  | -0.464419000 | 3.017693000  | -0.109759000 |
| C  | -1.827619000 | -3.909541000 | -0.086887000 |
| C  | 4.143822000  | -0.395541000 | -0.349001000 |
| C  | -0.509024000 | -4.249120000 | -0.106160000 |
| C  | 3.805948000  | -1.712919000 | -0.266237000 |
| C  | -4.365441000 | 0.398924000  | 0.162993000  |
| C  | 1.593434000  | 3.913630000  | -0.291525000 |

|   |              |              |              |
|---|--------------|--------------|--------------|
| C | -4.020744000 | 1.713816000  | 0.192167000  |
| C | 0.280079000  | 4.252291000  | -0.166083000 |
| H | -2.694741000 | -4.557556000 | -0.053901000 |
| H | 5.129072000  | 0.048147000  | -0.422410000 |
| H | -0.062161000 | -5.235612000 | -0.094957000 |
| H | 4.454556000  | -2.580311000 | -0.262360000 |
| H | -5.351716000 | -0.046213000 | 0.207637000  |
| H | 2.458309000  | 4.562208000  | -0.357937000 |
| H | -4.662495000 | 2.583330000  | 0.263350000  |
| H | -0.163500000 | 5.238739000  | -0.110490000 |
| C | -3.061164000 | -1.732890000 | -0.018503000 |
| C | 2.827457000  | 1.737154000  | -0.370306000 |
| C | -1.843824000 | 2.941057000  | 0.035967000  |
| C | 1.623740000  | -2.941176000 | -0.148719000 |
| H | -3.994733000 | -2.285957000 | 0.016082000  |
| H | 3.757976000  | 2.291224000  | -0.447192000 |
| H | -2.390349000 | 3.876882000  | 0.101186000  |
| H | 2.171817000  | -3.878361000 | -0.137814000 |
| O | -0.066705000 | 0.021630000  | 1.658640000  |
| H | 0.990433000  | -0.019738000 | 2.126942000  |
| H | 2.610936000  | 0.970775000  | 2.499200000  |
| H | 1.896596000  | -0.064501000 | 3.839461000  |
| H | 2.746533000  | -0.853978000 | 2.412056000  |
| C | 2.195496000  | 0.006146000  | 2.792240000  |
| N | -0.037642000 | -0.033948000 | -1.999836000 |
| H | 0.239022000  | -0.925510000 | -2.415529000 |
| H | 0.486148000  | 0.721496000  | -2.445566000 |

#### 4c-<sup>2</sup>ts1<sub>(is)</sub>

|    |              |              |              |
|----|--------------|--------------|--------------|
| Fe | 0.073760000  | 0.018715000  | -0.081239000 |
| N  | -1.680696000 | 0.966602000  | -0.221515000 |
| N  | -0.887479000 | -1.747751000 | -0.213948000 |
| N  | 1.057930000  | 1.773944000  | -0.121237000 |
| N  | 1.867294000  | -0.953921000 | 0.007698000  |
| C  | -1.877316000 | 2.320815000  | -0.157200000 |
| C  | -0.320656000 | -2.990326000 | -0.089525000 |
| C  | -2.921900000 | 0.410008000  | -0.386858000 |
| C  | -2.232171000 | -1.953430000 | -0.374187000 |
| C  | 0.489072000  | 3.017726000  | -0.076046000 |
| C  | 2.047733000  | -2.306662000 | 0.105256000  |
| C  | 2.413243000  | 1.970098000  | -0.072154000 |
| C  | 3.114555000  | -0.392480000 | 0.041452000  |
| C  | -3.285637000 | 2.626622000  | -0.252876000 |
| C  | -1.338708000 | -4.009604000 | -0.179019000 |
| C  | -3.933691000 | 1.439118000  | -0.406980000 |
| C  | -2.525279000 | -3.366002000 | -0.363901000 |
| C  | 1.513549000  | 4.033513000  | -0.023769000 |
| C  | 3.457137000  | -2.612016000 | 0.209794000  |
| C  | 2.709630000  | 3.382695000  | -0.029458000 |
| C  | 4.119924000  | -1.423771000 | 0.163538000  |
| H  | -3.700070000 | 3.626836000  | -0.222694000 |
| H  | -1.148741000 | -5.073653000 | -0.109187000 |
| H  | -4.994731000 | 1.254794000  | -0.522252000 |
| H  | -3.516232000 | -3.789044000 | -0.474034000 |
| H  | 1.321208000  | 5.098665000  | 0.014721000  |
| H  | 3.863920000  | -3.611552000 | 0.302726000  |
| H  | 3.708779000  | 3.799033000  | 0.008246000  |
| H  | 5.186142000  | -1.240056000 | 0.214012000  |
| C  | -0.875057000 | 3.278339000  | -0.076384000 |
| C  | 1.034548000  | -3.255150000 | 0.072601000  |
| C  | 3.376460000  | 0.969499000  | -0.016398000 |
| C  | -3.185987000 | -0.949199000 | -0.482422000 |
| H  | -1.183077000 | 4.318850000  | -0.035582000 |
| H  | 1.327229000  | -4.297539000 | 0.156421000  |
| H  | 4.415860000  | 1.281287000  | 0.022445000  |
| H  | -4.221286000 | -1.251684000 | -0.607187000 |
| O  | 0.087265000  | -0.023165000 | 1.666383000  |
| H  | -0.943314000 | -0.002784000 | 2.105682000  |
| H  | -2.684898000 | -0.875046000 | 2.278704000  |
| H  | -1.971281000 | -0.076593000 | 3.780704000  |
| H  | -2.643877000 | 0.957084000  | 2.408973000  |
| C  | -2.218677000 | 0.004147000  | 2.721801000  |
| N  | 0.435980000  | -0.156249000 | -1.988024000 |
| H  | 1.255545000  | 0.333614000  | -2.354542000 |

H 0.397121000 -1.095506000 -2.390412000

#### 4c-<sup>2</sup>ts1<sub>(ls)</sub>

Fe -0.070358000 0.003964000 -0.104417000  
N -2.055351000 -0.445453000 0.024635000  
N 0.366302000 -1.955416000 -0.204116000  
N -0.529729000 1.966435000 -0.162489000  
N 1.881337000 0.447408000 -0.198001000  
C -3.094932000 0.439559000 0.074077000  
C 1.611546000 -2.516112000 -0.304479000  
C -2.603448000 -1.694053000 0.104679000  
C -0.520131000 -2.997622000 -0.102795000  
C -1.782517000 2.519917000 -0.092893000  
C 2.923485000 -0.434511000 -0.314713000  
C 0.353837000 3.010931000 -0.166133000  
C 2.437978000 1.700141000 -0.208284000  
C -4.347201000 -0.272610000 0.197872000  
C 1.510096000 -3.954395000 -0.291426000  
C -4.041610000 -1.598283000 0.219913000  
C 0.187155000 -4.253067000 -0.163396000  
C -1.685805000 3.959298000 -0.088018000  
C 4.176445000 0.278900000 -0.365386000  
C -0.358957000 4.264289000 -0.128806000  
C 3.875573000 1.604572000 -0.294133000  
H -5.319085000 0.201320000 0.259528000  
H 2.354465000 -4.628968000 -0.361636000  
H -4.708434000 -2.447832000 0.301260000  
H -0.286371000 -5.225453000 -0.106707000  
H -2.535220000 4.629658000 -0.042523000  
H 5.147321000 -0.193331000 -0.450890000  
H 0.113681000 5.238708000 -0.127605000  
H 4.545928000 2.455017000 -0.312774000  
C -2.977658000 1.820569000 0.005144000  
C 2.808361000 -1.815133000 -0.369556000  
C 1.737476000 2.896123000 -0.182223000  
C -1.895882000 -2.886533000 0.045716000  
H -3.892349000 2.403241000 0.054794000  
H 3.723800000 -2.392398000 -0.453993000  
H 2.315303000 3.815163000 -0.188167000  
H -2.463958000 -3.809108000 0.114772000  
O -0.141295000 -0.013300000 1.645513000  
H 0.910755000 0.026409000 2.152047000  
H 2.529690000 -0.946696000 2.441534000  
H 2.610178000 0.882688000 2.471157000  
H 1.793443000 -0.021562000 3.849557000  
C 2.087747000 -0.016316000 2.798621000  
N -0.336860000 -0.029466000 -1.972726000  
H -0.653421000 -0.923346000 -2.351223000  
H -0.915296000 0.721276000 -2.352200000

#### Methane (CH<sub>4</sub>)

C 0.000000000 0.000000000 0.000000000  
H 0.632031000 0.632031000 0.632031000  
H -0.632031000 -0.632031000 0.632031000  
H -0.632031000 0.632031000 -0.632031000  
H 0.632031000 -0.632031000 -0.632031000

#### Methanol (CH<sub>3</sub>OH)

C -0.683512000 -0.020828000 0.000000000  
H -1.050488000 -0.544843000 0.895391000  
H -1.083543000 0.995255000 -0.000001000  
H -1.050488000 -0.544844000 -0.895390000  
O 0.762888000 0.122484000 0.000000000  
H 1.182485000 -0.760477000 0.000000000

#### Methyl radical (CH<sub>3</sub>·)

H 0.000000000 1.084648000 0.000000000  
H 0.939333000 -0.542324000 0.000000000  
H -0.939333000 -0.542324000 0.000000000  
C 0.000000000 0.000000000 0.000000000
